# Supplementary material for: In Silico Exploration of Potential Natural Inhibitors against SARS-Cov-2 nsp10
Source: MDPI journal article supplement (doi:10.3390/molecules26206151), 2021-10-12
Supplement: s1 [file s1]

## ***In silico* Exploration of Potential Natural Inhibitors Against SARS-Cov-2 nsp10**

Ibrahim. H. Eissa<sup>a\*</sup>, Mohamed M. Khalifa <sup>a</sup>, Eslam B. Elkaeed<sup>b</sup>, Elsayed E. Hafez<sup>c</sup>, Aisha A. Alsfook<sup>d</sup>, Ahmed M. Metwaly<sup>e\*</sup>

<sup>a</sup> Pharmaceutical Medicinal Chemistry & Drug Design Department, Faculty of Pharmacy (Boys), Al-Azhar University, Cairo11884, Egypt.

<sup>b</sup> Department of Pharmaceutical Sciences, College of Pharmacy, Almaarefa University, Ad Diriyah 13713, Riyadh, Saudi Arabia.

<sup>c</sup> Department of Plant Protection and Biomolecular Diagnosis, ALCRI, City of Scientific Research and Technological Applications, New Borg El-Arab City, Alexandria, 21934, Egypt

<sup>d</sup> Department of Pharmaceutical Sciences, College of Pharmacy, Princess Nourah bint Abdulrahman University, Riyadh, Saudi Arabia.

<sup>e</sup> Pharmacognosy and Medicinal Plants Department, Faculty of Pharmacy (Boys), Al-Azhar University, Cairo 11884, Egypt.

| Figure S1. Chemical structures of the examined natural antiviral compounds |                      |
|----------------------------------------------------------------------------|----------------------|
| The most similar compounds with the co-crystallized ligand (SAM)           |                      |
| Method                                                                     | Molecular Similarity |
|                                                                            | Pharmacophore        |
|                                                                            | Docking studies      |
|                                                                            | ADMET studies        |
|                                                                            | Toxicity studies     |
|                                                                            | DFT studies          |
| Toxicity report                                                            |                      |

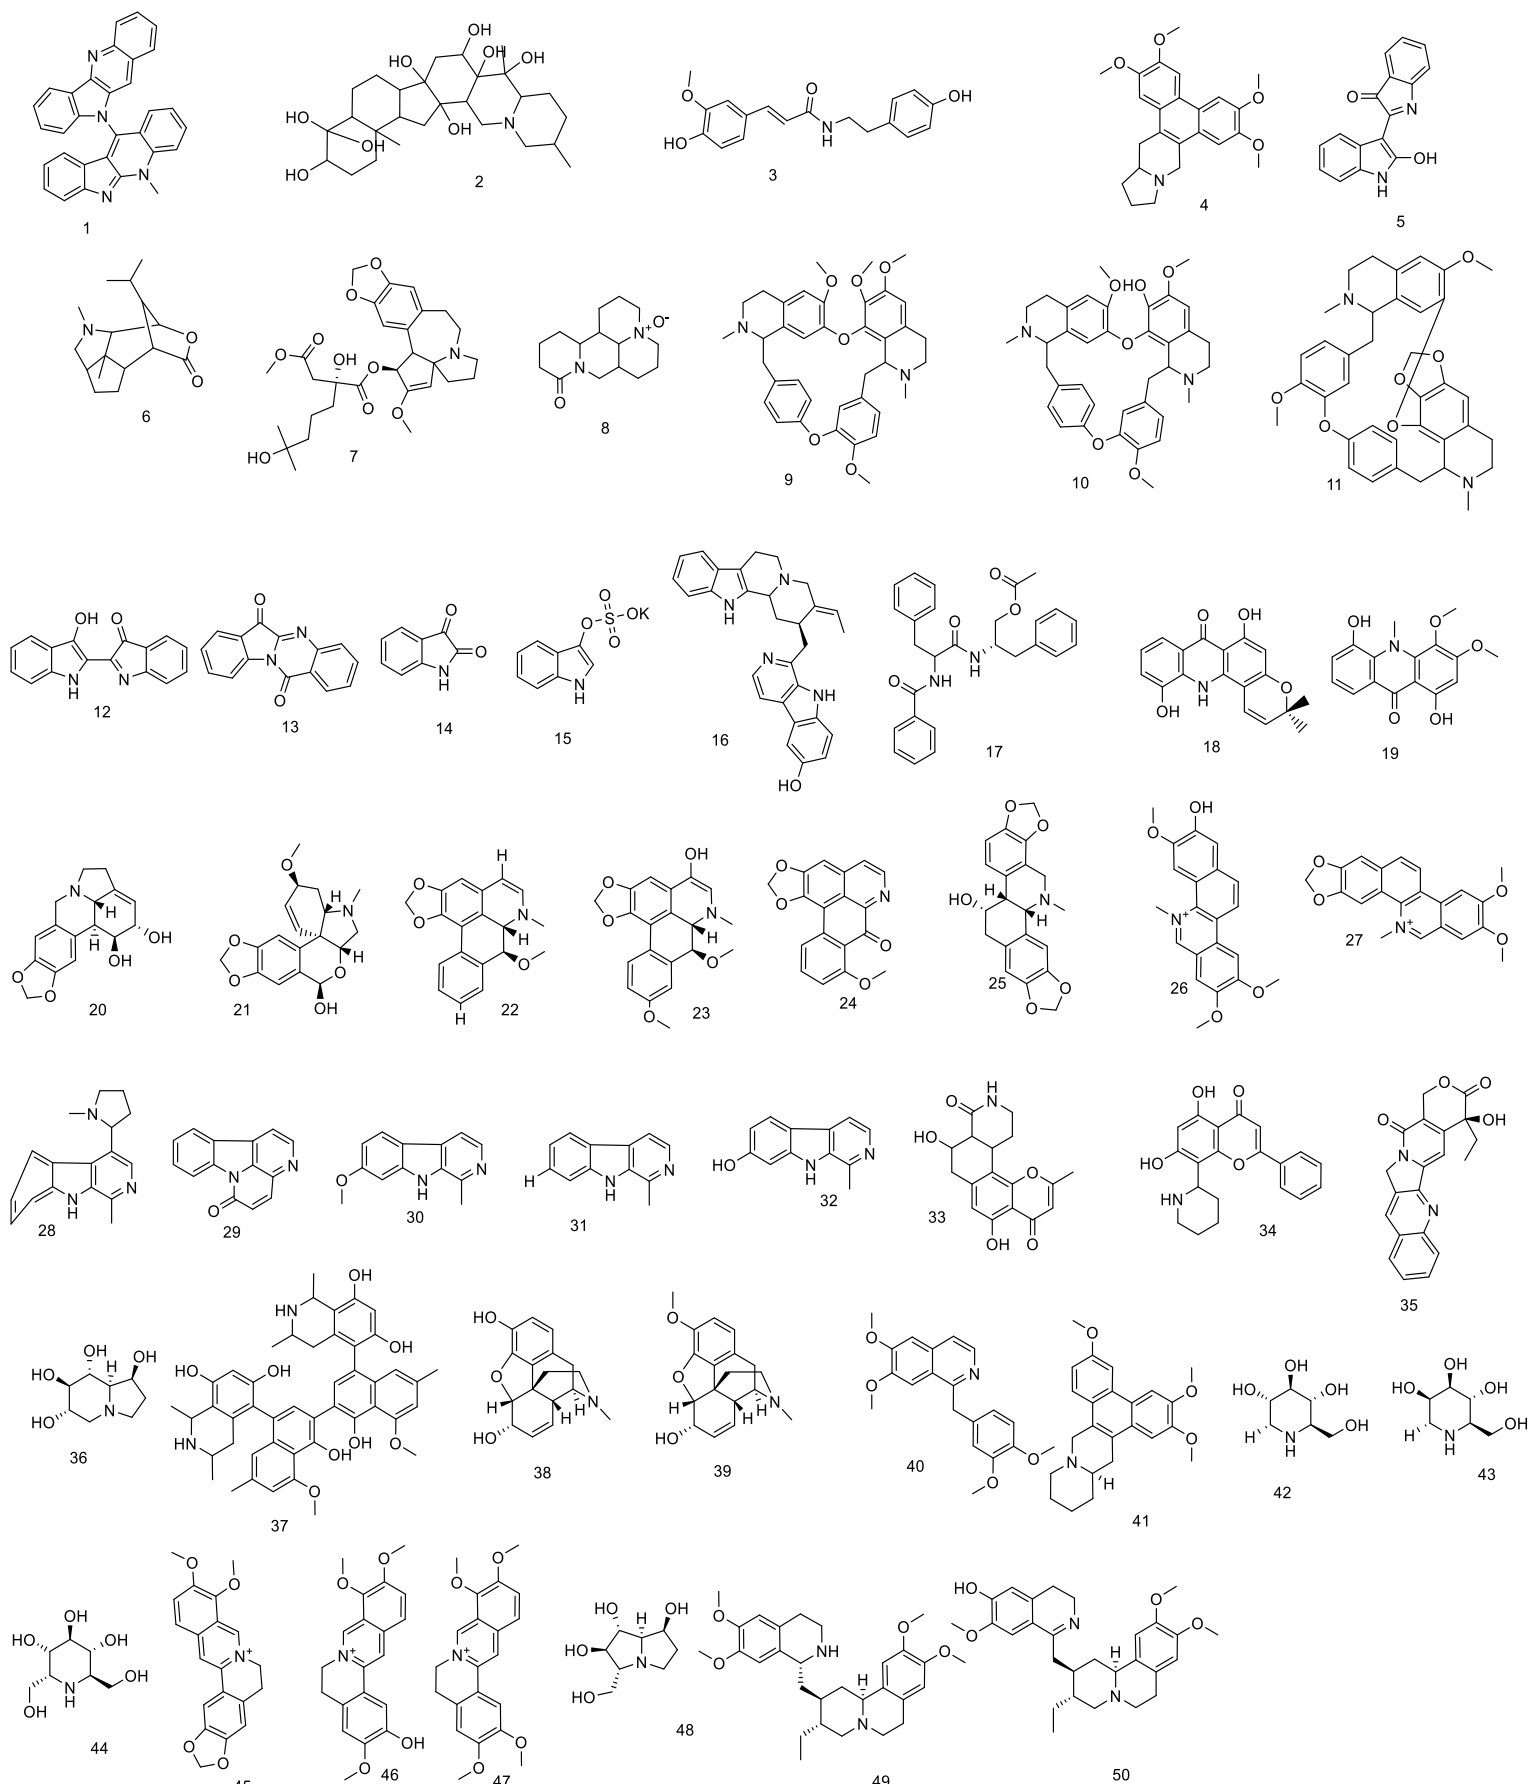

Figure S1. Chemical structures of the examined 310 natural antiviral compounds

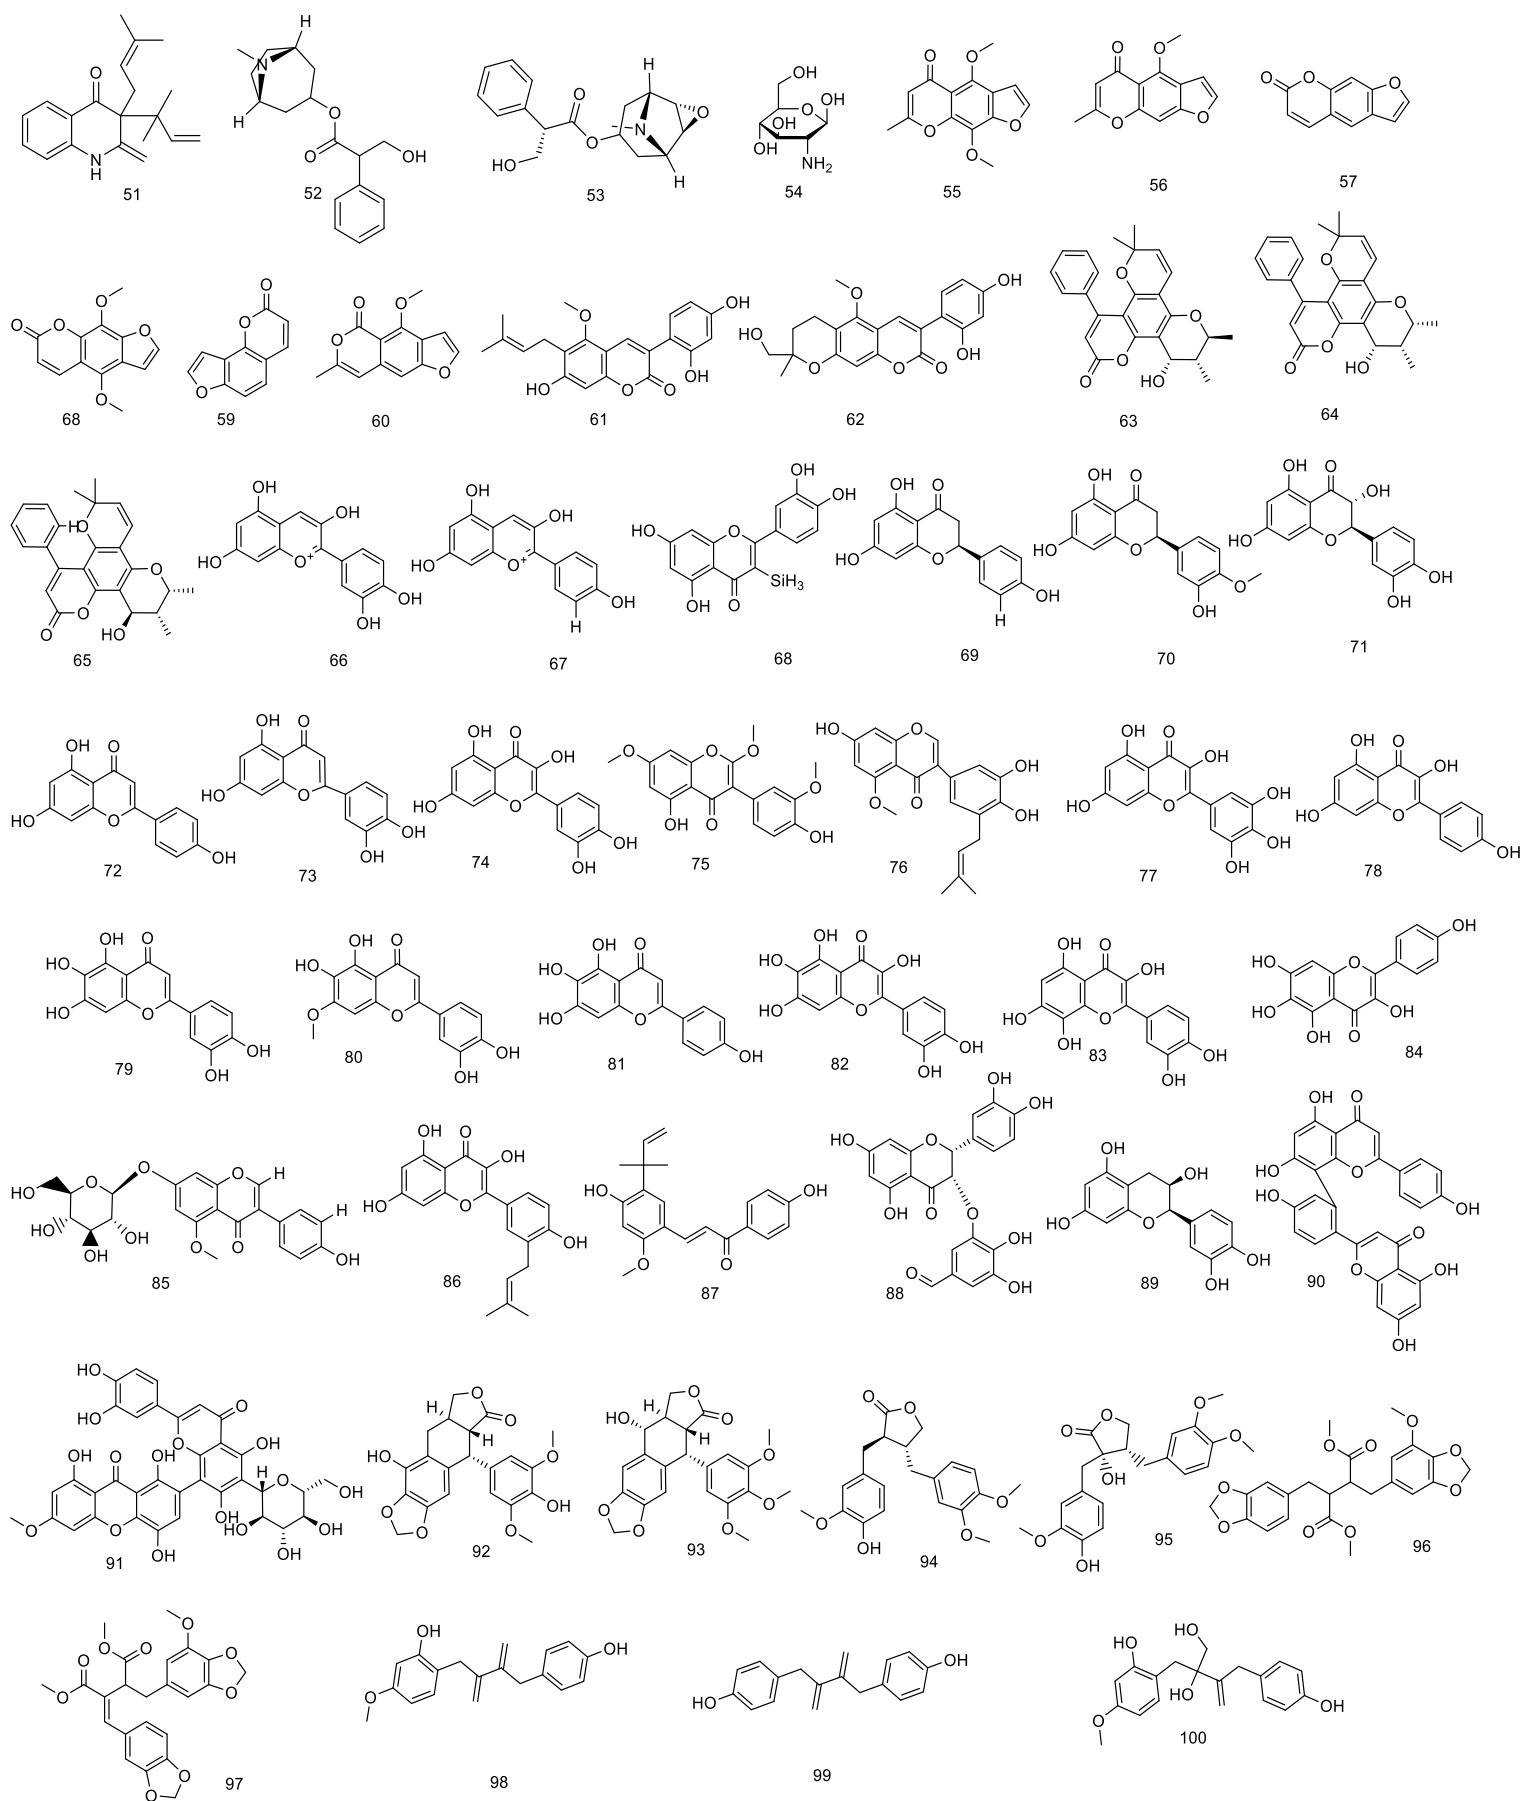

Figure S1. Chemical structures of the examined 310 natural antiviral compounds

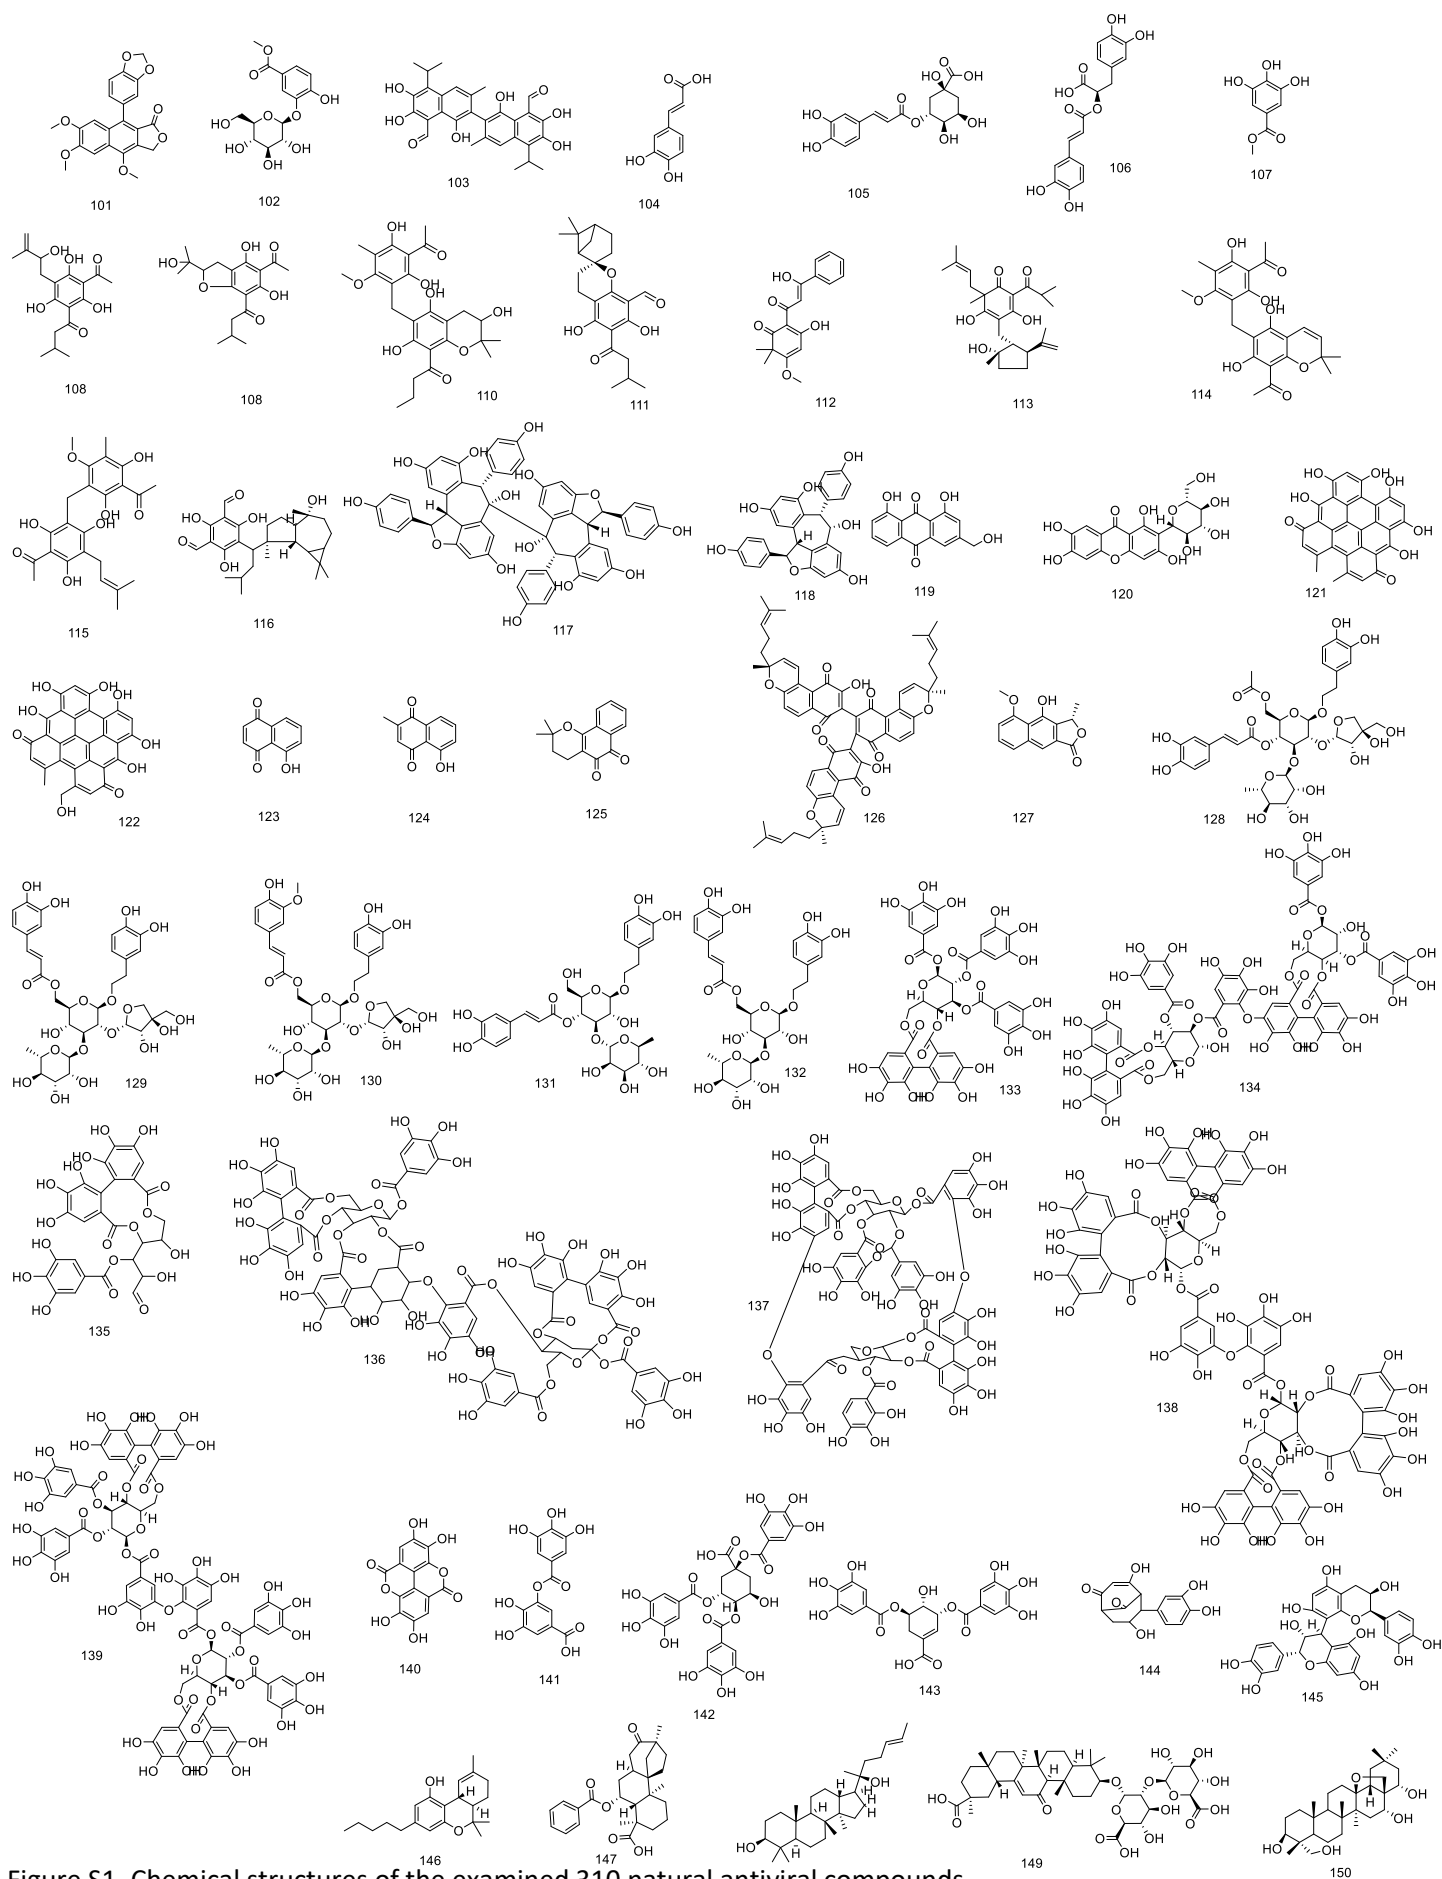

Figure S1. Chemical structures of the examined 310 natural antiviral compounds

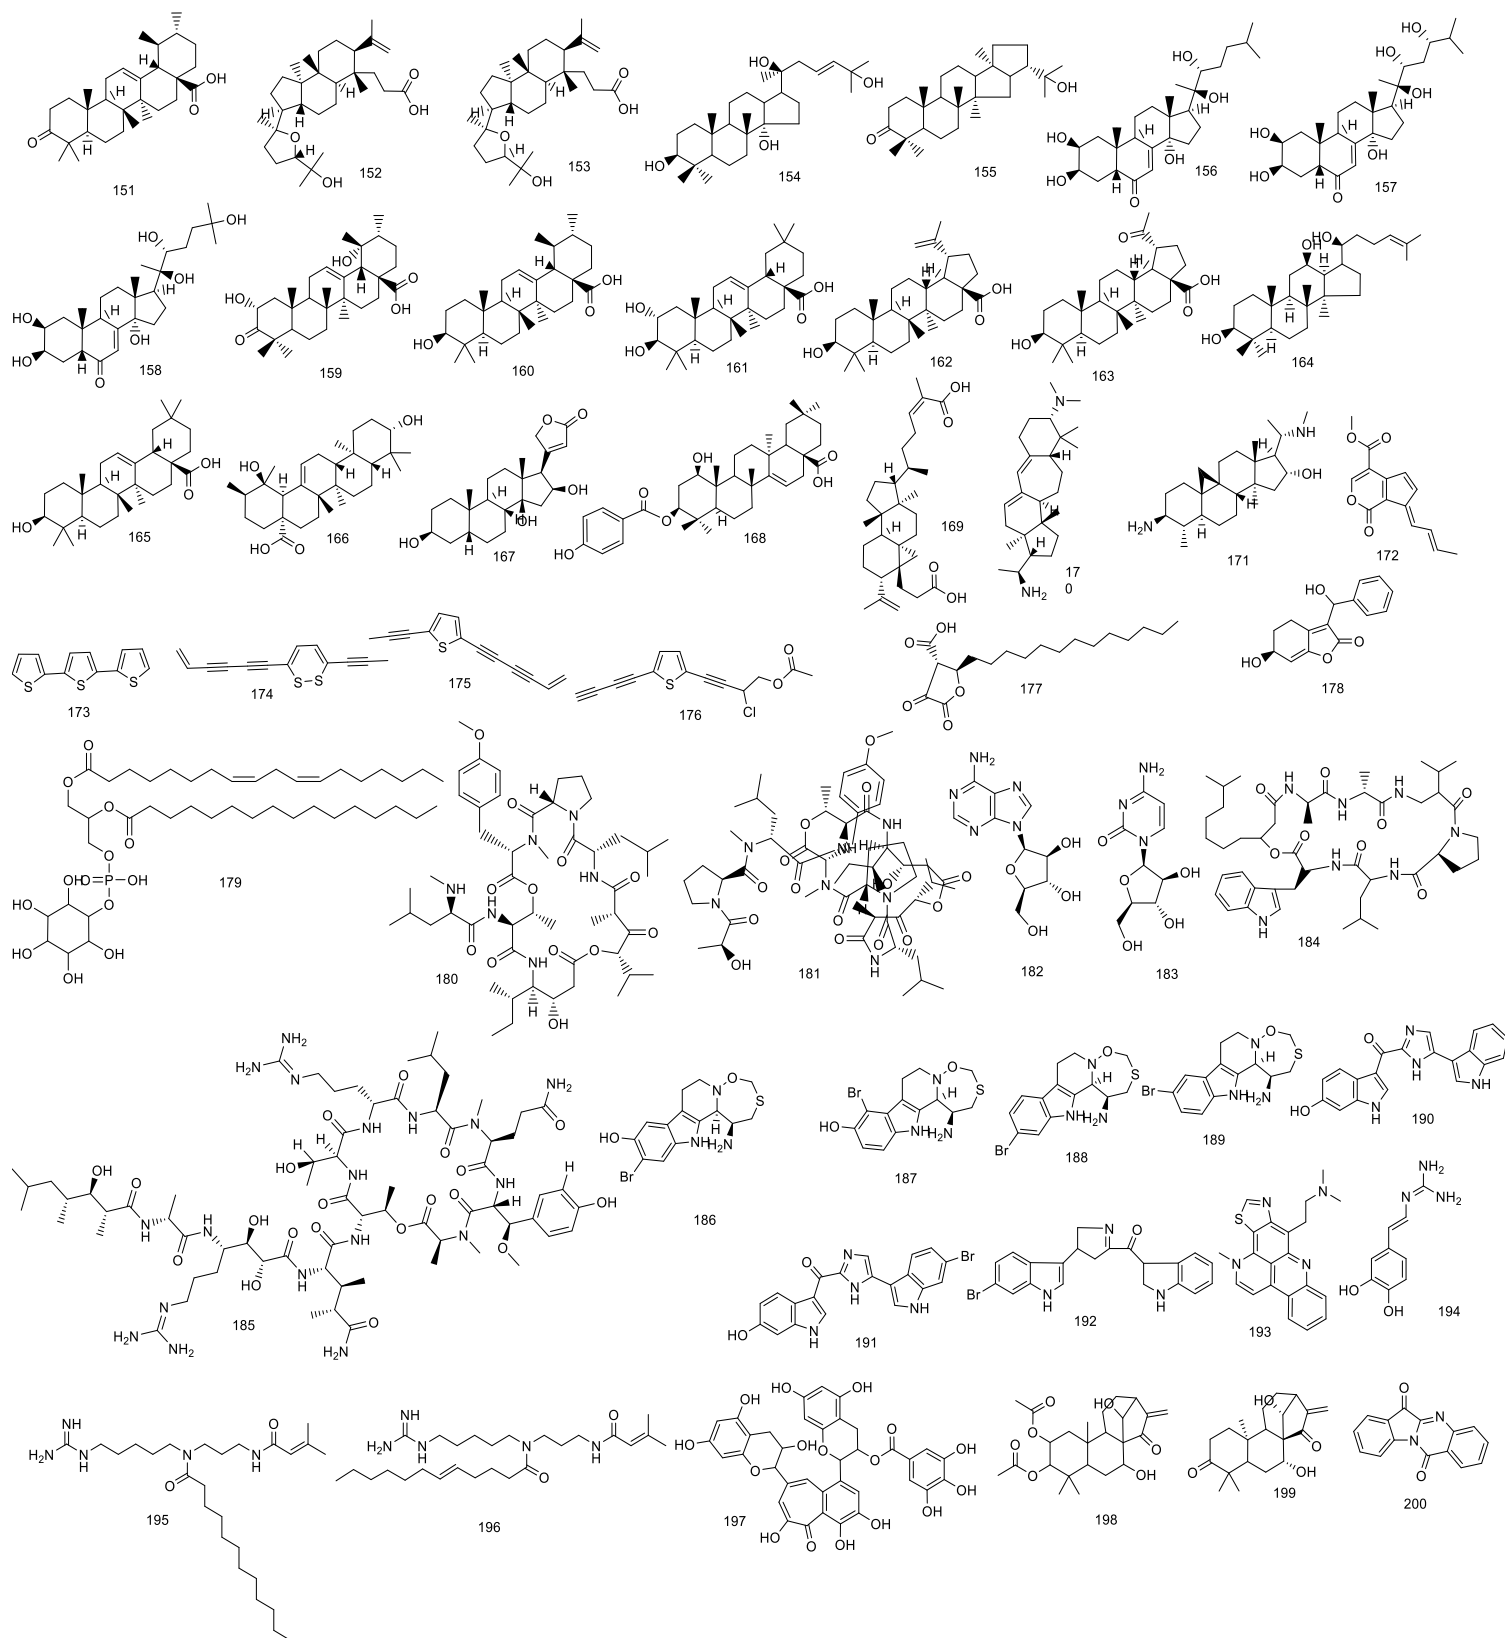

Figure S1. Chemical structures of the examined 310 natural antiviral compounds

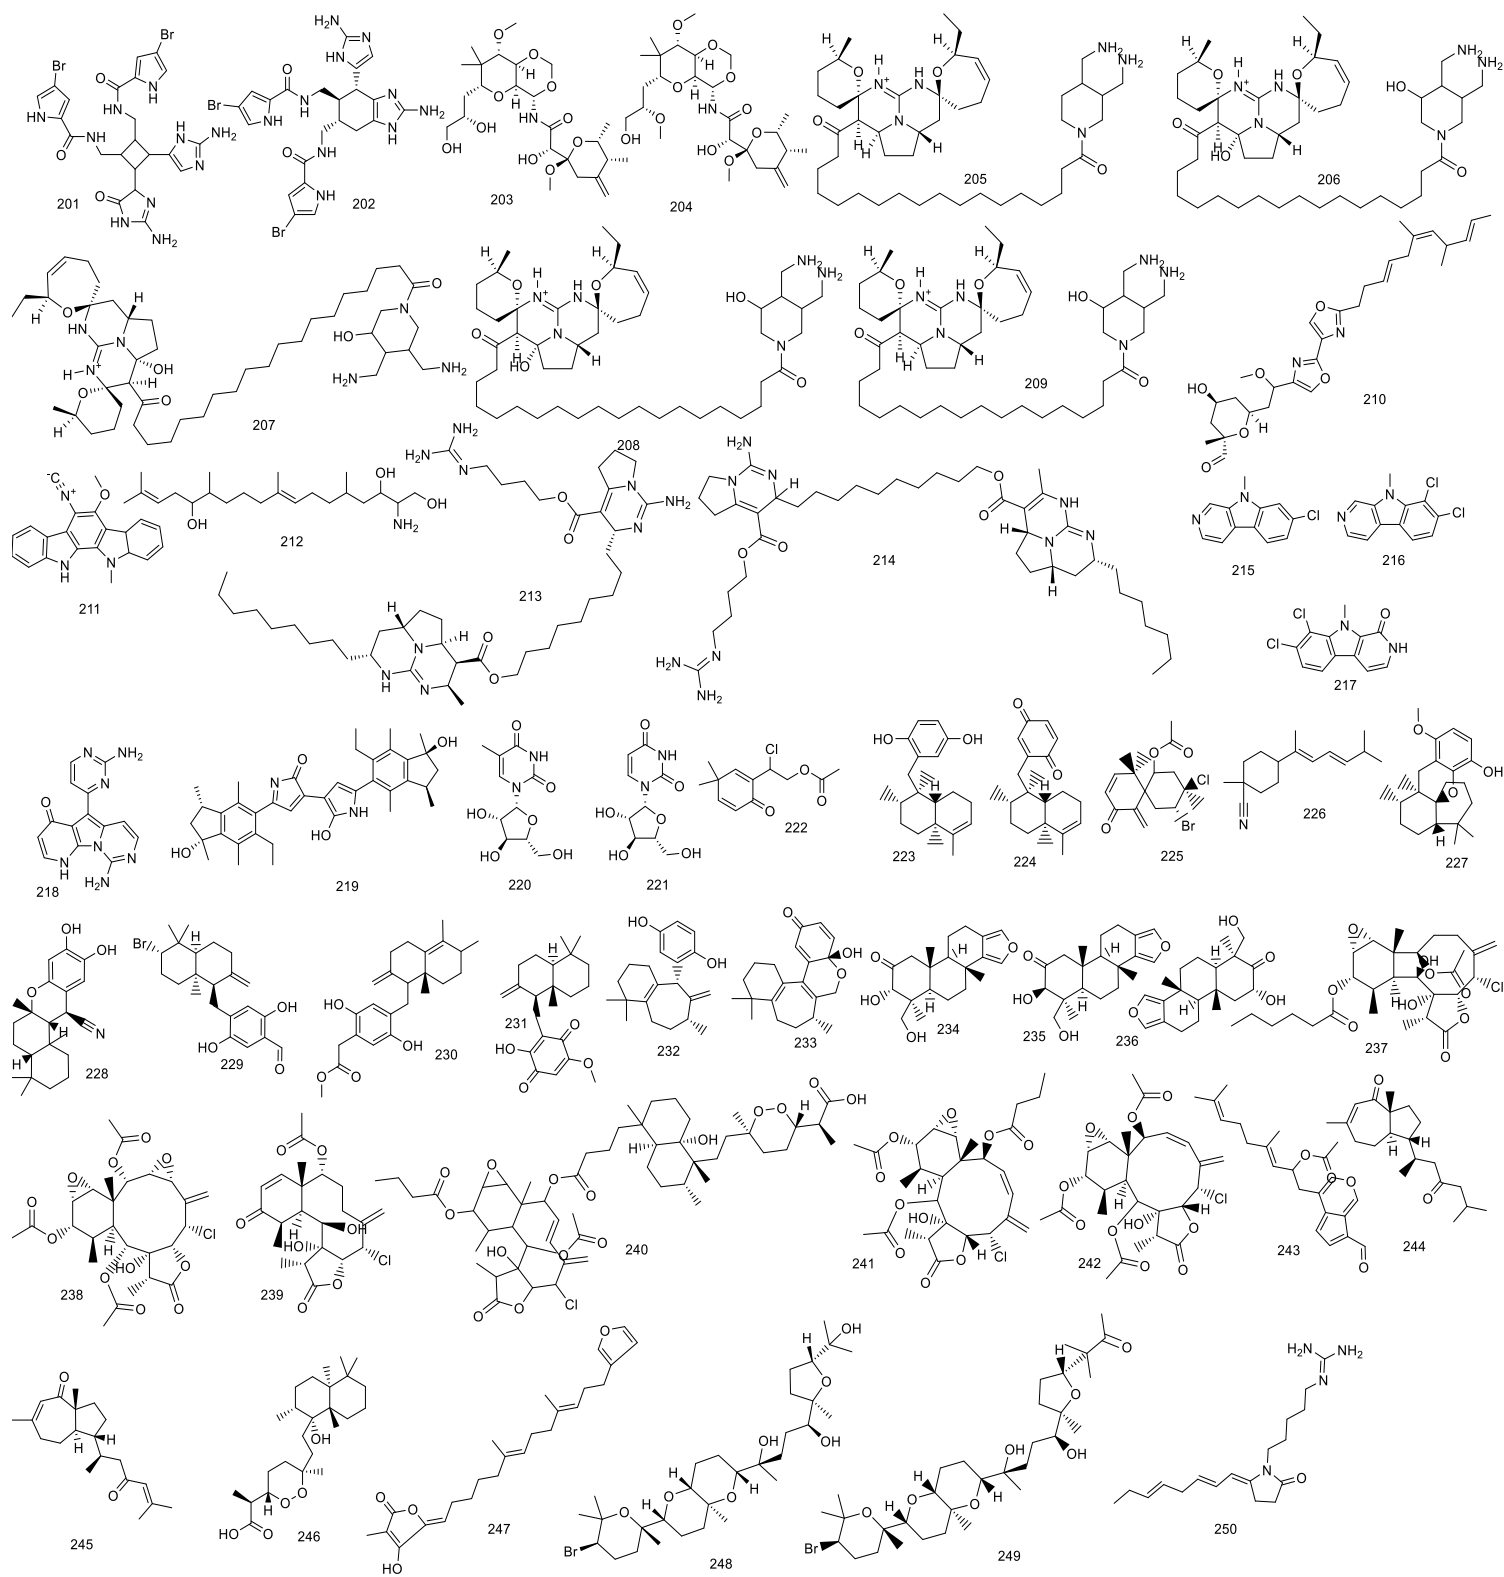

Figure S1. Chemical structures of the examined 310 natural antiviral compounds

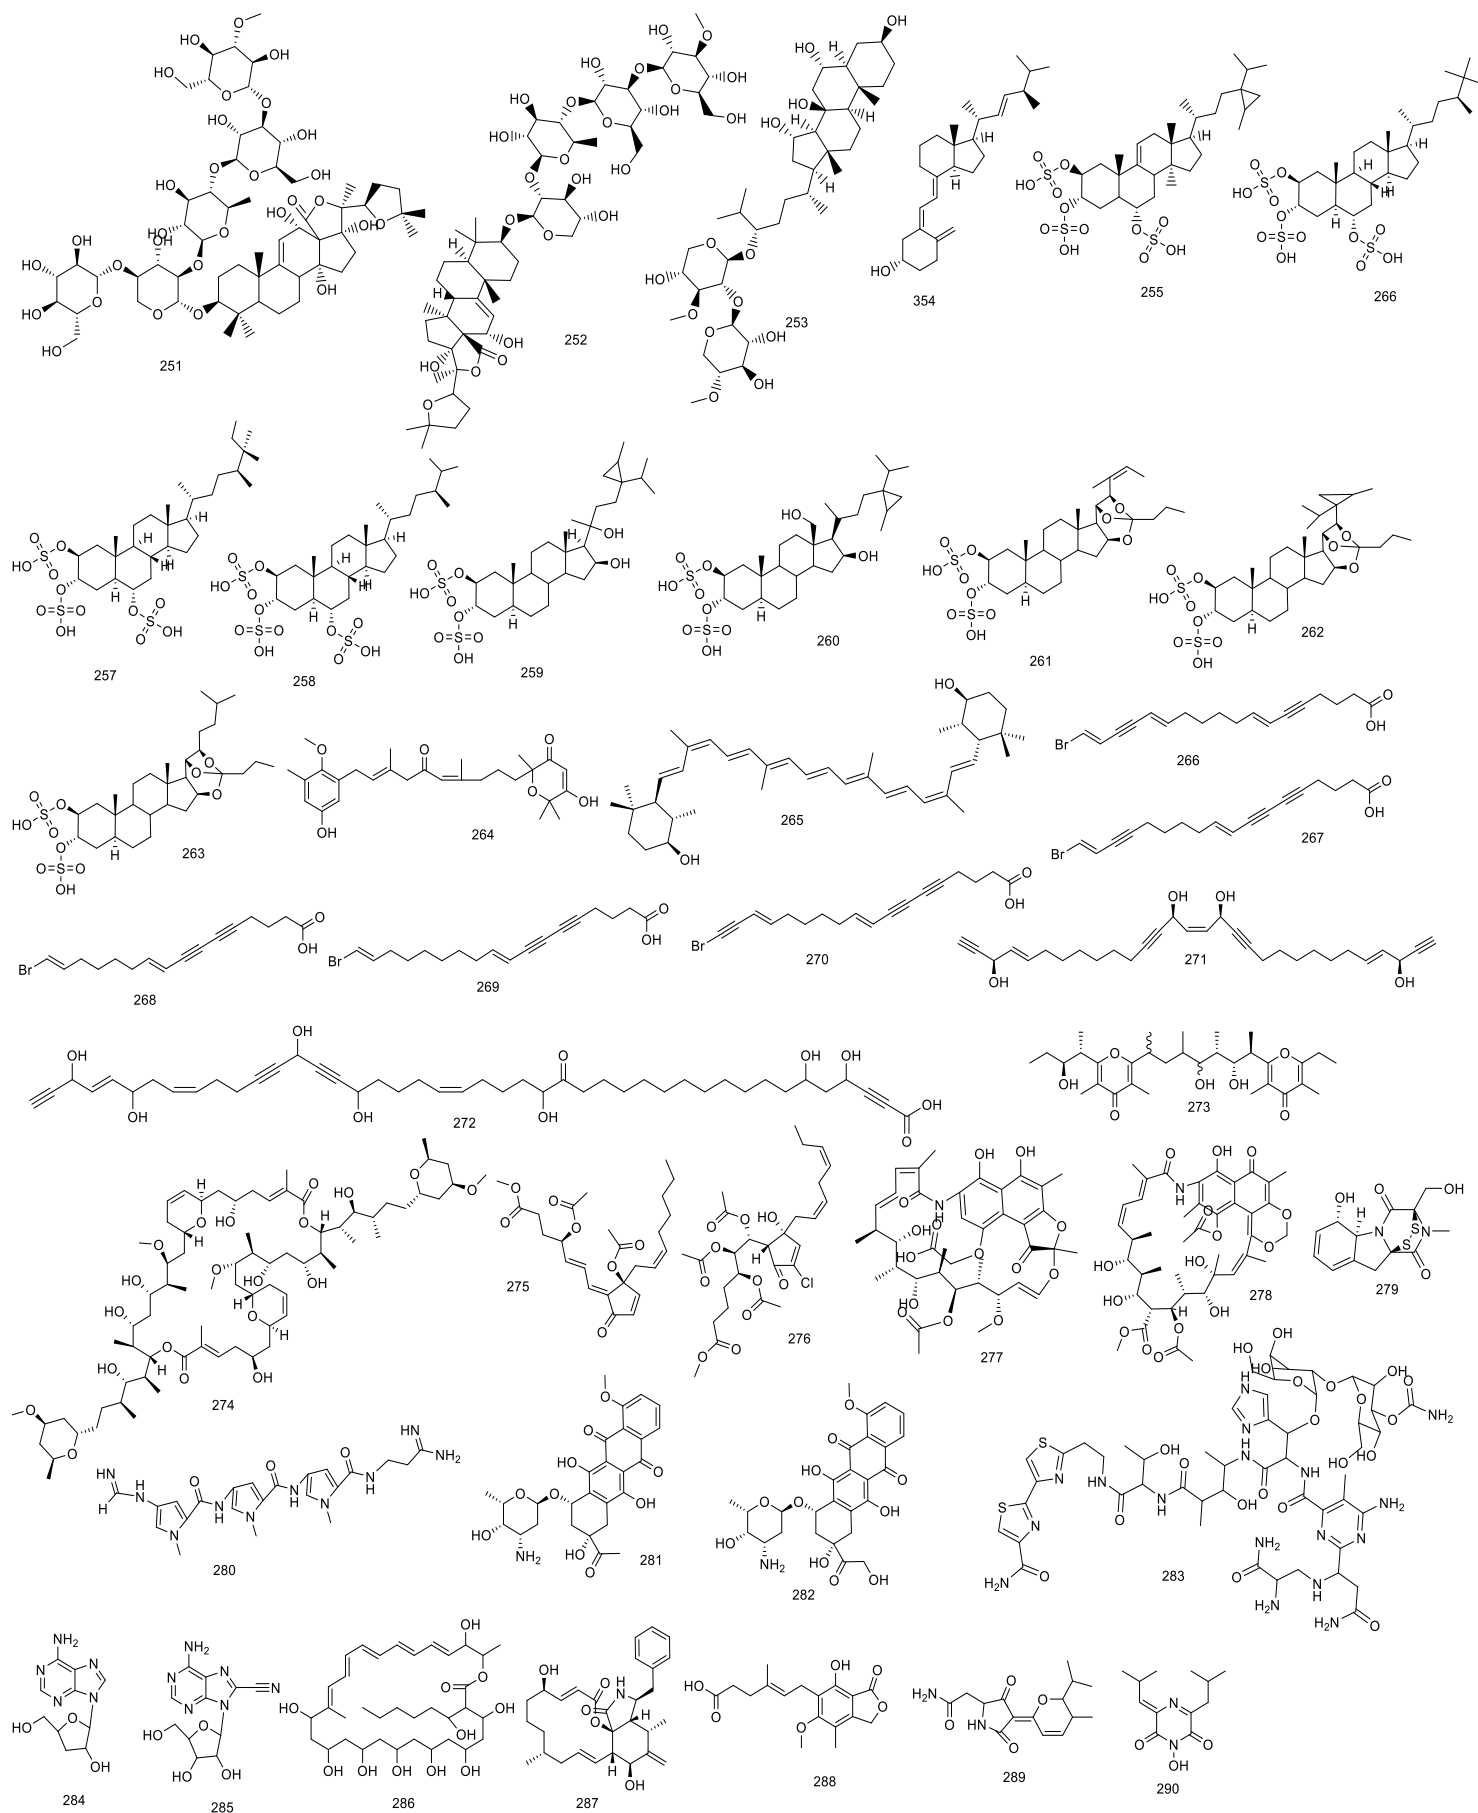

Figure S1. Chemical structures of the examined 310 natural antiviral compounds

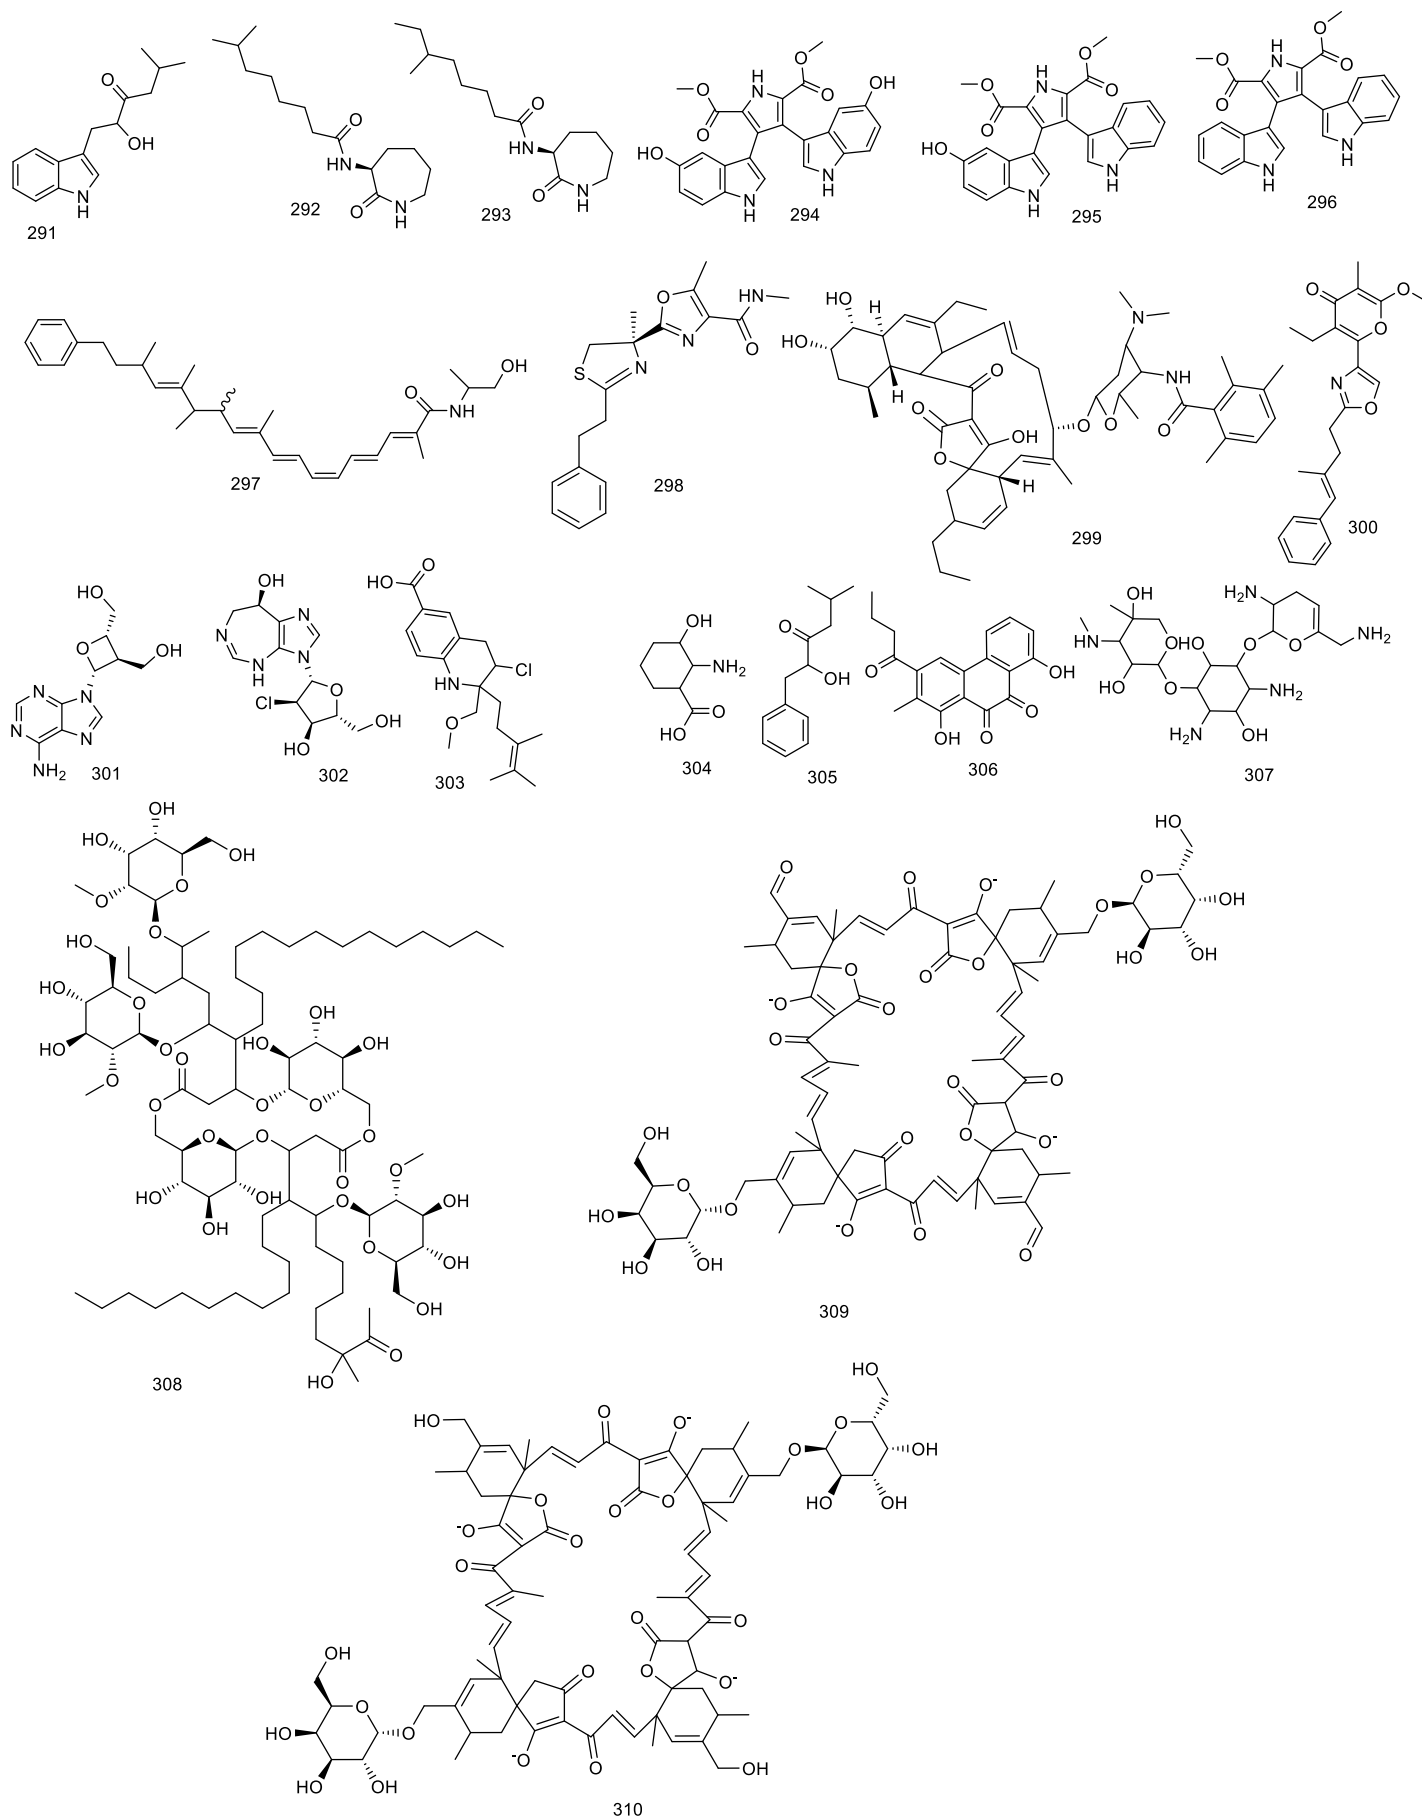

Figure S1. Chemical structures of the examined 310 natural antiviral compounds



The most similar compounds with the co-crystallized ligand (SAM) of SARS-CoV-2 nonstructural protein (nsp10) (PDB ID: 6W4H)

| Comp . No | Name                            | Type                     | Source                                   | Antiviral activity                                                                                                                                                                                                                                                                                      |
|-----------|---------------------------------|--------------------------|------------------------------------------|---------------------------------------------------------------------------------------------------------------------------------------------------------------------------------------------------------------------------------------------------------------------------------------------------------|
| 44        | $\alpha$ -Homonojirimycin       | Azasugar                 | <i>Omphalea diandra</i> [1]              | Anti-HIV-1 activity via being $\alpha$ -glucosidase inhibitors [2,3]                                                                                                                                                                                                                                    |
| 48        | australine                      | Pyrrolizidine alkaloid   | <i>Castanospermum australe</i> [4]       | aAnti-HIV-1 activity via being $\alpha$ -glucosidase inhibitors [2,3]                                                                                                                                                                                                                                   |
| 85        | 5-O-Methylgenistein-7-glucoside | isoflavonoid             | <i>Ulex europaeus</i> [5]                | Exhibited inhibition potential against HSV-1 [5]                                                                                                                                                                                                                                                        |
| 102       | woodorien                       | Benzoic acid derivative  | <i>Woodwardia orientalis</i> [6]         | Exhibited inhibition potential against HSV-1 [6]                                                                                                                                                                                                                                                        |
| 105       | chlorogenic acid                | Phenolic compound        | Several plants including coffee beans[7] | Inhibited effectively HBV ( <i>in vivo</i> and <i>in vitro</i> ) [8], influenza and parainfluenza viruses [9], enterovirus [10]. Surprisingly, it regulated the innate immune against Gama coronavirus through the positive regulation of the signaling pathways of MDA5, TLR7, and NF- $\kappa$ B [11] |
| 220       | Spongothymidine                 | Nucleosides              | <i>Cryptotethya crypta</i> [12]          | The modification of 220 resulted in the sugar-modified nucleoside analog, vidarabine(182) [13]. Vidarabine was very active against HSV [14,15], HBV [16], varicella-zoster [17], human polyomavirus [18], adenovirus [19], and Epstein–Barr [20] virus infections                                       |
| 221       | Spongouridine                   |                          |                                          |                                                                                                                                                                                                                                                                                                         |
| 182       | Vidarabine                      |                          |                                          |                                                                                                                                                                                                                                                                                                         |
| 282       | Doxorubicin                     | Anthracycline glycosides | <i>Streptomyces peucetius</i> [21]       | Was very active against avian myeloblastosis in addition to murine and rauscher leukemia viruses [22,23]                                                                                                                                                                                                |
| 284       | Cordycepin                      | adenosine derivative     | <i>Cordyceps militaris</i> [24].         | Cordycepin showed promising activities against influenza virus ( <i>in vivo</i> ) [25], HIV via inhibition of reverse transcriptase [26] Rotavirus through the induction of type I interferon [27], and Epstein-Barr virus [28]                                                                         |
| 285       | Toyocamycin                     | adenosine derivative     | <i>Streptomyces toyocaensis</i> [29]     | Stopped the replication of vesicular stomatitis virus [30] and stabilized the adenovirus nuclear RNA [31]                                                                                                                                                                                               |
| 301       | Oxetanocin A                    |                          | <i>Bacillus megaterium</i> [32]          | Was active against HIV [33] HBV [34] varicella-zoster virus [35]                                                                                                                                                                                                                                        |
| 302       | Adechlorin                      |                          | <i>Actinomadura</i> sp[36]               | Was active against various viruses through the inhibition of adenosine deaminase [36].                                                                                                                                                                                                                  |

1. Kite, G.C.; Fellows, L.E.; Fleet, G.W.; Liu, P.S.; Scofield, A.M.; Smith, N.G.  $\alpha$ -Homonojirimycin [2, 6-dideoxy-2, 6-imino-d-glycero-l-gulo-heptitol] from *Omphalea diandra* L.: isolation and glucosidase inhibition. *Tetrahedron letters* **1988**, *29*, 6483-6485.
2. Cos, P.; Maes, L.; Vlietinck, A.; Pieters, L. Plant-derived leading compounds for chemotherapy of human immunodeficiency virus (HIV) infection—an update (1998–2007). *Planta medica* **2008**, *74*, 1323-1337.
3. Vlietinck, A.; De Bruyne, T.; Apers, S.; Pieters, L. Plant-derived leading compounds for chemotherapy of human immunodeficiency virus (HIV) infection. *Planta medica* **1998**, *64*, 97-109.
4. Molyneux, R.J.; Benson, M.; Wong, R.Y.; Tropea, J.E.; Elbein, A.D. Australine, a novel pyrrolizidine alkaloid glucosidase inhibitor from *Castanospermum australe*. *Journal of Natural Products* **1988**, *51*, 1198-1206.
5. El Sayed, K.A. Natural products as antiviral agents. In *Studies in Natural Products Chemistry*, Elsevier: 2000; Vol. 24, pp. 473-572.
6. XU, H.-X.; KADOTA, S.; KUROKAWA, M.; SHIRAKI, K.; MATSUMOTO, T.; NAMBA, T. Isolation and structure of woodorien, a new glucoside having antiviral activity, from *Woodwardia orientalis*. *Chemical and pharmaceutical bulletin* **1993**, *41*, 1803-1806.
7. Moores, R.; McDermott, D.L.; Wood, T. Determination of chlorogenic acid in coffee. *Analytical Chemistry* **1948**, *20*, 620-624.
8. Wang, G.-F.; Shi, L.-P.; Ren, Y.-D.; Liu, Q.-F.; Liu, H.-F.; Zhang, R.-J.; Li, Z.; Zhu, F.-H.; He, P.-L.; Tang, W. Anti-hepatitis B virus activity of chlorogenic acid, quinic acid and caffeic acid in vivo and in vitro. *Antiviral research* **2009**, *83*, 186-190.
9. Ding, Y.; Cao, Z.; Cao, L.; Ding, G.; Wang, Z.; Xiao, W. Antiviral activity of chlorogenic acid against influenza A (H1N1/H3N2) virus and its inhibition of neuraminidase. *Scientific reports* **2017**, *7*, 1-11.
10. Li, X.; Liu, Y.; Hou, X.; Peng, H.; Zhang, L.; Jiang, Q.; Shi, M.; Ji, Y.; Wang, Y.; Shi, W. Chlorogenic acid inhibits the replication and viability of enterovirus 71 in vitro. *PloS one* **2013**, *8*, e76007.
11. Abaidullah, M.; Peng, S.; Song, X.; Zou, Y.; Li, L.; Jia, R.; Yin, Z. Chlorogenic acid is a positive regulator of MDA5, TLR7 and NF- $\kappa$ B signaling pathways mediated antiviral responses against Gammacoronavirus infection. *International immunopharmacology* **2021**, *96*, 107671.
12. Stempien, M.; Nigrelli, R.; Pulitzer, G. Further observations on the Caribbean sponge *Cryptotethya crypta* (de Laubenfels). *nature* **1965**, *207*, 217-217.
13. Hong, W.-H.; Chang, T.; Daly, R.E. Vidarabine. In *Analytical Profiles of Drug Substances*, Elsevier: 1986; Vol. 15, pp. 647-672.
14. Whitley, R.J.; Alford, C.A.; Hirsch, M.S.; Schooley, R.T.; Luby, J.P.; Aoki, F.Y.; Hanley, D.; Nahmias, A.J.; Soong, S.-J.; Group\*, N.C.A.S. Vidarabine versus acyclovir therapy in herpes simplex encephalitis. *New England Journal of Medicine* **1986**, *314*, 144-149.
15. Whitley, R.J.; Nahmias, A.J.; Soong, S.-J.; Galasso, G.G.; Fleming, C.L.; Alford, C.A.; Connor, J.; Bryson, Y.; Linnemann, C. Vidarabine therapy of neonatal herpes simplex virus infection. *Pediatrics* **1980**, *66*, 495-501.
16. Pollard, R.B.; Smith, J.L.; Neal, E.A.; Gregory, P.B.; Merigan, T.C.; Robinson, W.S. Effect of vidarabine on chronic hepatitis B virus infection. *Jama* **1978**, *239*, 1648-1650.
17. Miwa, N.; Kurosaki, K.; Yoshida, Y.; Kurokawa, M.; Saito, S.; Shiraki, K. Comparative efficacy of acyclovir and vidarabine on the replication of varicella-zoster virus. *Antiviral research* **2005**, *65*, 49-55.
18. Chapman, C.; Flower, A.; Durrant, S. The use of vidarabine in the treatment of human polyomavirus associated acute haemorrhagic cystitis. *Bone marrow transplantation* **1991**, *7*, 481-483.

19. Kurosaki, K.; Miwa, N.; Yoshida, Y.; Kurokawa, M.; Kurimoto, M.; Endo, S.; Shiraki, K. Therapeutic basis of vidarabine on adenovirus-induced haemorrhagic cystitis. *Antiviral Chemistry and Chemotherapy* **2004**, *15*, 281-285.
20. Kimura, H.; Morita, M.; Tsuge, I.; Hoshino, Y.; Tanaka, N.; Ito, Y.; Morishima, T. Vidarabine therapy for severe chronic active Epstein–Barr virus infection. *Journal of pediatric hematology/oncology* **2001**, *23*, 294-299.
21. Hutchinson, C.; Colombo, A. Genetic engineering of doxorubicin production in *Streptomyces peucetius*: a review. *Journal of Industrial Microbiology and Biotechnology* **1999**, *23*, 647-652.
22. Tomita, Y.; Kuwata, T. Effects of adriamycin on the reverse transcriptase and the production of murine leukemia virus. *Cancer research* **1976**, *36*, 3016-3019.
23. Papas, T.S.; Schafer, M.P. The inhibition of Rauscher leukemia virus and avian myeloblastosis virus DNA polymerases by anthracycline compounds. *Annals of the New York Academy of Sciences* **1977**, *284*, 566-575.
24. Cunningham, K.; Manson, W.; Spring, F.; Hutchinson, S. Cordycepin, a metabolic product isolated from cultures of *Cordyceps militaris* (Linn.) Link. *nature* **1950**, *166*, 949-949.
25. Ohta, Y.; Lee, J.-B.; Hayashi, K.; Fujita, A.; Park, D.K.; Hayashi, T. In vivo anti-influenza virus activity of an immunomodulatory acidic polysaccharide isolated from *Cordyceps militaris* grown on germinated soybeans. *Journal of Agricultural and Food Chemistry* **2007**, *55*, 10194-10199.
26. Mueller, W.E.; Weiler, B.E.; Charubala, R.; Pfeleiderer, W.; Leserman, L.; Sobol, R.W.; Suhadolnik, R.J.; Schroeder, H.C. Cordycepin analogs of 2', 5'-oligoadenylate inhibit human immunodeficiency virus infection via inhibition of reverse transcriptase. *Biochemistry* **1991**, *30*, 2027-2033.
27. Chanda, S.; Banerjee, A.; Nandi, S.; Chakrabarti, S.; Sarkar, M. Cordycepin an adenosine analogue executes anti rotaviral effect by stimulating induction of type I interferon. *J Virol Antivir Res* **2015**, *4*, 2.
28. Ryu, E.; Son, M.; Lee, M.; Lee, K.; Cho, J.Y.; Cho, S.; Lee, S.K.; Lee, Y.M.; Cho, H.; Sung, G.-H. Cordycepin is a novel chemical suppressor of Epstein-Barr virus replication. *Oncoscience* **2014**, *1*, 866.
29. Nishimura, H.; Katagiri, K.; Satō, K.; Mayama, M.; Shimaoka, N. Toyocamycin, a new anti-candida antibiotics. *The Journal of Antibiotics, Series A* **1956**, *9*, 60-62.
30. Moyer, S.A.; Holmes, K.S. The specific inhibition of vesicular stomatitis virus replication by toyocamycin. *Virology* **1979**, *98*, 99-107.
31. Madore, H.P.; Bello, L.J. Stabilization of adenovirus nuclear RNA by intercalating drugs. *Biochimica et Biophysica Acta (BBA)-Nucleic Acids and Protein Synthesis* **1978**, *520*, 404-410.
32. SHIMADA, N.; HASEGAWA, S.; HARADA, T.; TOMISAWA, T.; FUJII, A.; TAKITA, T. Oxetanocin, a novel nucleoside from bacteria. *The Journal of antibiotics* **1986**, *39*, 1623-1625.
33. HOSHINO, H.; SHIMIZU, N.; SHIMADA, N.; TAKITA, T.; TAKEUCHI, T. Inhibition of infectivity of human immunodeficiency virus by oxetanocin. *The Journal of antibiotics* **1987**, *40*, 1077-1078.
34. NAGAHATA, T.; UEDA, K.; TSURIMOTO, T.; CHISAKA, O.; MATSUBARA, K. Anti-hepatitis B virus activities of purine derivatives of oxetanocin A. *The Journal of antibiotics* **1989**, *42*, 644-646.
35. Sakuma, T.; Saijo, M.; Suzutani, T.; Yoshida, I.; Saito, S.; Kitagawa, M.; Hasegawa, S.; Azuma, M. Antiviral activity of oxetanocins against varicella-zoster virus. *Antimicrobial agents and chemotherapy* **1991**, *35*, 1512-1514.
36. OMURA, S.; IMAMURA, N.; KUGA, H.; ISHIKAWA, H.; YAMAZAKI, Y.; OKANO, K.; KIMURA, K.; TAKAHASHI, Y.; TANAKA, H. Adechlorin, a new adenosine deaminase inhibitor containing chlorine production, isolation and properties. *The Journal of antibiotics* **1985**, *38*, 1008-1015.

## Method

### 1- Molecular Similarity

Molecular Similarity of the 310 natural compounds against the co-crystallized ligand (SAM) of SARS-Cov-2 nsp16-nsp10 (**PDB ID: 6W4H**) was carried out calculated using Discovery studio 4.0. At first, the CHARMM force field was applied then the compounds were prepared using prepare ligand protocol. Then, the 310 compounds were used as a test set while the co-crystallized ligand (SAM) was used as a reference compounds. The protocol was adjusted to give 10% output. The default molecular properties were applied. The molecular properties include number of rotatable bonds, number of rings, number of aromatic rings, number of hydrogen bond donors (HBA), number of hydrogen bond acceptors (HBD), partition coefficient (ALog p), molecular weight (M. Wt), and molecular fractional polar surface area (MFPSA).

### 2- Fingerprint study

Fingerprint study of the 30 selected compounds against the co-crystallized ligand (SAM) of SARS-Cov-2 nsp16-nsp10 (**PDB ID: 6W4H**) was carried out calculated using Discovery studio 4.0. At first, the CHARMM force field was applied then the compounds were prepared using prepare ligand protocol. Then, the 30 compounds were used as a test set while the co-crystallized ligand (SAM) was used as a reference compounds. The protocol was adjusted to give the most related compounds to the co-crystallized ligand (40-50%). The default molecular properties were applied. The used fingerprints were based on some parameters related to type of atoms which may be one of the following: charge, hybridization, H-bond acceptor, H-bond donor, Positive ionizable, Negative ionizable, Halogen, Aromatic, or None of the above. In addition, it includes the ALogP category of atoms.

### 3- Docking studies

Crystal structure of SARS-Cov-2 nsp16-nsp10 (**PDB ID: 6W4H**), resolution: 1.80 Å] was obtained from Protein Data Bank. The docking investigation was accomplished using MOE2014 software. At first, the crystal structure of SARS-Cov-2 nsp16-nsp10 was prepared by removing water molecules. Only one chain was retained beside the co-crystallized ligand (SAM). Then, the selected chain was protonated and subjected to minimization of energy process. Next, the active site of the target protein was defined.

Structures of the tested compounds and the co-crystallized ligand were drawn using ChemBioDraw Ultra 14.0 and saved as MDL-SD format. Such file was opened using MOE to display the 3D structures which were protonated and subjected to energy minimization. Formerly, validation of the docking process was performed by docking the co-crystallized ligand against the isolated pocket of active site. The produced RMSD value indicated the validity of process. Finally, docking of the tested compounds was done through the dock option inserted in compute window. For each docked molecule, 30 docked poses were

produced using ASE for scoring function and force field for refinement. The results of the docking process were then visualized using Discovery Studio 4.0 software.

#### **4- ADMET studies**

ADMET descriptors (absorption, distribution, metabolism, excretion and toxicity) of the compounds were determined using Discovery studio 4.0. At first, the CHARMM force field was applied then the tested compounds were prepared and minimized according to the preparation of small molecule protocol. Then ADMET descriptors protocol was applied to carry out these studies.

#### **5- Toxicity studies**

The toxicity parameters of the tested compounds were calculated using Discovery studio 4.0. Ribavirin was used as a reference drug. At first, the CHARMM force field was applied then the compounds were prepared and minimized according to the preparation of small molecule protocol. Then different parameters were calculated from toxicity prediction (extensible) protocol.

#### **6- DFT studies:**

The DFT parameters (total energy, binding energy, HOMO, LUMO, gap energy, dipole moment, and electrostatic potential) were calculated using Discovery studio software. the tested compounds were prepared using prepare ligand protocol. Then, the prepared compounds were subjected to DFT calculation protocol using the default option.

# Toxicity report -48

# TOPKAT\_Aerobic\_Biodegradability

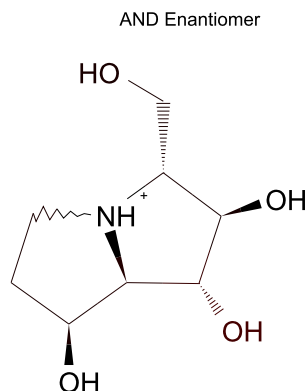

$C_8H_{16}NO_4$   
Molecular Weight: 190.21693  
ALogP: -3.556  
Rotatable Bonds: 1  
Acceptors: 4  
Donors: 5

## Model Prediction

Prediction: Degradable

Probability: 0.551

Enrichment: 1.262

Bayesian Score: 1.265

Mahalanobis Distance: 12.042

Mahalanobis Distance p-value: 0.000264

Prediction: Positive if the Bayesian score is above the estimated best cutoff value from minimizing the false positive and false negative rate.

Probability: The estimated probability that the sample is in the positive category. This assumes that the Bayesian score follows a normal distribution and is different from the prediction using a cutoff.

Enrichment: An estimate of enrichment, that is, the increased likelihood (versus random) of this sample being in the category.

Bayesian Score: The standard Laplacian-modified Bayesian score.

Mahalanobis Distance: The Mahalanobis distance (MD) is the distance to the center of the training data. The larger the MD, the less trustworthy the prediction.

Mahalanobis Distance p-value: The p-value gives the fraction of training data with an MD greater than or equal to the one for the given sample, assuming normally distributed data. The smaller the p-value, the less trustworthy the prediction. For highly non-normal X properties (e.g., fingerprints), the MD p-value is wildly inaccurate.

## Structural Similar Compounds

| Name               | 1,3-Propanediol, 2,2-bis(hydroxymethyl)-                     | 1,2,3-Propanetriol                                           | 1,3,5-Pentanetriol, 3-methyl-                                |
|--------------------|--------------------------------------------------------------|--------------------------------------------------------------|--------------------------------------------------------------|
| Structure          |                                                              |                                                              |                                                              |
| Actual Endpoint    | Non-Degradable                                               | Degradable                                                   | Non-Degradable                                               |
| Predicted Endpoint | Degradable                                                   | Degradable                                                   | Degradable                                                   |
| Distance           | 0.726                                                        | 0.972                                                        | 0.987                                                        |
| Reference          | Environmental Toxicology & Chemistry 18(9), 1763-1768, 1999. | Environmental Toxicology & Chemistry 18(9), 1763-1768, 1999. | Environmental Toxicology & Chemistry 18(9), 1763-1768, 1999. |

## Model Applicability

Unknown features are fingerprint features in the query molecule, but not found in the training set.

1. All properties and OPS components are within expected ranges.

## Feature Contribution

### Top features for positive contribution

| Fingerprint | Bit/Smiles | Feature Structure | Score | Degradable in training set |
|-------------|------------|-------------------|-------|----------------------------|
| SCFP_12     | -424515134 | <br>[*]C([*])O    | 0.648 | 87 out of 111              |

|         |             |                                                                                                                         |       |                |
|---------|-------------|-------------------------------------------------------------------------------------------------------------------------|-------|----------------|
| SCFP_12 | -1272798659 | 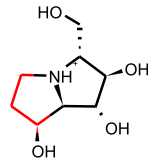<br><chem>[*][C@@H]1[*][*]CC1</chem> | 0.518 | 160 out of 234 |
| SCFP_12 | -711686199  | <br><chem>[*]C([*])CO</chem>         | 0.490 | 106 out of 159 |

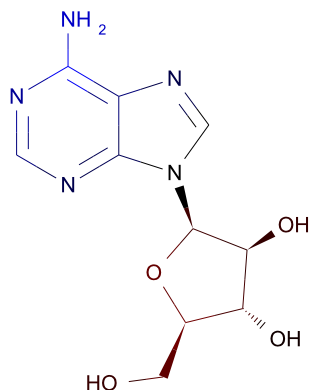

$C_{10}H_{13}N_5O_4$

Molecular Weight: 267.24132

ALogP: -1.881

Rotatable Bonds: 2

Acceptors: 8

Donors: 4

## Model Prediction

Prediction: Non-Degradable

Probability: 0.241

Enrichment: 0.553

Bayesian Score: -5.853

Mahalanobis Distance: 16.343

Mahalanobis Distance p-value: 1.39e-016

Prediction: Positive if the Bayesian score is above the estimated best cutoff value from minimizing the false positive and false negative rate.

Probability: The estimated probability that the sample is in the positive category. This assumes that the Bayesian score follows a normal distribution and is different from the prediction using a cutoff.

Enrichment: An estimate of enrichment, that is, the increased likelihood (versus random) of this sample being in the category.

Bayesian Score: The standard Laplacian-modified Bayesian score.

Mahalanobis Distance: The Mahalanobis distance (MD) is the distance to the center of the training data. The larger the MD, the less trustworthy the prediction.

Mahalanobis Distance p-value: The p-value gives the fraction of training data with an MD greater than or equal to the one for the given sample, assuming normally distributed data. The smaller the p-value, the less trustworthy the prediction. For highly non-normal X properties (e.g., fingerprints), the MD p-value is wildly inaccurate.

## Structural Similar Compounds

| Name               | H_Acid                                                       | Benzenesulfonic acid, 4, 4'-oxybis-, dihydrazide             | Glycine, N,N-bis(carboxymethyl)-                             |
|--------------------|--------------------------------------------------------------|--------------------------------------------------------------|--------------------------------------------------------------|
| Structure          |                                                              |                                                              |                                                              |
| Actual Endpoint    | Non-Degradable                                               | Non-Degradable                                               | Non-Degradable                                               |
| Predicted Endpoint | Non-Degradable                                               | Non-Degradable                                               | Non-Degradable                                               |
| Distance           | 0.700                                                        | 0.751                                                        | 0.852                                                        |
| Reference          | Environmental Toxicology & Chemistry 18(9), 1763-1768, 1999. | Environmental Toxicology & Chemistry 18(9), 1763-1768, 1999. | Environmental Toxicology & Chemistry 18(9), 1763-1768, 1999. |

## Model Applicability

Unknown features are fingerprint features in the query molecule, but not found in the training set.

- OPS PC13 out of range. Value: -4.9079. Training min, max, SD, explained variance: -3.586, 5.704, 1.413, 0.0229.

## Feature Contribution

| Top features for positive contribution |            |                   |       |                            |
|----------------------------------------|------------|-------------------|-------|----------------------------|
| Fingerprint                            | Bit/Smiles | Feature Structure | Score | Degradable in training set |
| SCFP_12                                | -424515134 | <br>[*]C([*])O    | 0.648 | 87 out of 111              |



| SCFP_12                                | -188384666 | 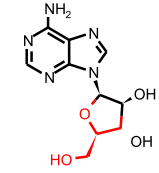<br><chem>[*][C@H]1[*][*][O][C@@H]1CO</chem>            | 0.590  | 3 out of 3                 |
|----------------------------------------|------------|--------------------------------------------------------------------------------------------------------------------------------------------|--------|----------------------------|
| SCFP_12                                | -711686199 | <br><chem>[*]C([*])CO</chem>                            | 0.490  | 106 out of 159             |
| Top Features for negative contribution |            |                                                                                                                                            |        |                            |
| Fingerprint                            | Bit/Smiles | Feature Structure                                                                                                                          | Score  | Degradable in training set |
| SCFP_12                                | 10         | <br><chem>[*]N</chem>                                   | -1.607 | 11 out of 145              |
| SCFP_12                                | 384920865  | <br><chem>[*]:[c]([*])N</chem>                         | -1.364 | 6 out of 65                |
| SCFP_12                                | 112554633  | <br><chem>[*][c]([*]):[c]1:n:[*]:[*]:[c]:1:[*]</chem> | -1.077 | 1 out of 12                |

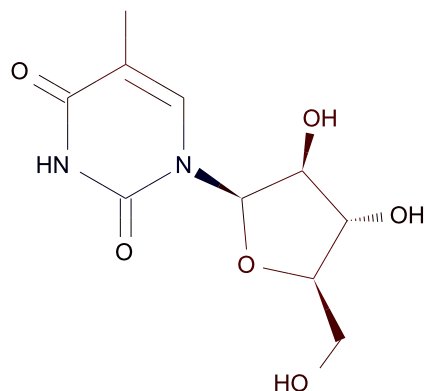

$C_{10}H_{14}N_2O_6$

Molecular Weight: 258.22795

ALogP: -2.005

Rotatable Bonds: 2

Acceptors: 6

Donors: 4

## Model Prediction

Prediction: Degradable

Probability: 0.626

Enrichment: 1.435

Bayesian Score: 2.880

Mahalanobis Distance: 11.416

Mahalanobis Distance p-value: 0.00333

Prediction: Positive if the Bayesian score is above the estimated best cutoff value from minimizing the false positive and false negative rate.

Probability: The estimated probability that the sample is in the positive category. This assumes that the Bayesian score follows a normal distribution and is different from the prediction using a cutoff.

Enrichment: An estimate of enrichment, that is, the increased likelihood (versus random) of this sample being in the category.

Bayesian Score: The standard Laplacian-modified Bayesian score.

Mahalanobis Distance: The Mahalanobis distance (MD) is the distance to the center of the training data. The larger the MD, the less trustworthy the prediction.

Mahalanobis Distance p-value: The p-value gives the fraction of training data with an MD greater than or equal to the one for the given sample, assuming normally distributed data. The smaller the p-value, the less trustworthy the prediction. For highly non-normal X properties (e.g., fingerprints), the MD p-value is wildly inaccurate.

## Structural Similar Compounds

| Name               | 1,3,5-Triazine-2,4,6(1H,3H,5H)-trione, 1,3,5-tris(2-hydroxyethyl)- | Benzenesulfonic acid, 4,4'-oxybis-, dihydrazide              | 1,3-Propanediol, 2,2-bis(hydroxymethyl)-                     |
|--------------------|--------------------------------------------------------------------|--------------------------------------------------------------|--------------------------------------------------------------|
| Structure          |                                                                    |                                                              |                                                              |
| Actual Endpoint    | Non-Degradable                                                     | Non-Degradable                                               | Non-Degradable                                               |
| Predicted Endpoint | Non-Degradable                                                     | Non-Degradable                                               | Degradable                                                   |
| Distance           | 0.690                                                              | 0.766                                                        | 0.784                                                        |
| Reference          | Environmental Toxicology & Chemistry 18(9), 1763-1768, 1999.       | Environmental Toxicology & Chemistry 18(9), 1763-1768, 1999. | Environmental Toxicology & Chemistry 18(9), 1763-1768, 1999. |

## Model Applicability

Unknown features are fingerprint features in the query molecule, but not found in the training set.

1. All properties and OPS components are within expected ranges.

## Feature Contribution

### Top features for positive contribution

| Fingerprint | Bit/Smiles | Feature Structure          | Score | Degradable in training set |
|-------------|------------|----------------------------|-------|----------------------------|
| SCFP_12     | 136627117  | <br><chem>[*]C(=*)C</chem> | 0.662 | 56 out of 70               |

|                                        |            |                                                                                                                              |        |                            |
|----------------------------------------|------------|------------------------------------------------------------------------------------------------------------------------------|--------|----------------------------|
| SCFP_12                                | -424515134 | 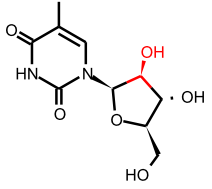<br><chem>[*]C([*])O</chem>               | 0.648  | 87 out of 111              |
| SCFP_12                                | -188384666 | <br><chem>[*]C@H1[*]O[C@@H]1CO</chem>     | 0.590  | 3 out of 3                 |
| Top Features for negative contribution |            |                                                                                                                              |        |                            |
| Fingerprint                            | Bit/Smiles | Feature Structure                                                                                                            | Score  | Degradable in training set |
| SCFP_12                                | 1256786467 | <br><chem>[*]NC(=O)N([*])[*]</chem>       | -0.541 | 1 out of 6                 |
| SCFP_12                                | 399659969  | <br><chem>[*]C([*])N(C=[*])C([*])</chem> | -0.341 | 0 out of 1                 |
| SCFP_12                                | 1631785938 | <br><chem>[*]C(=[*])NC(=[*])[*]</chem>  | -0.271 | 1 out of 4                 |

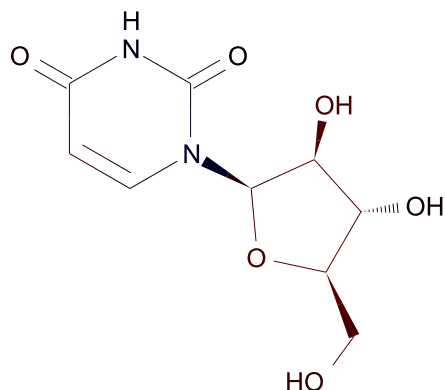

$C_9H_{12}N_2O_6$

Molecular Weight: 244.20137

ALogP: -2.451

Rotatable Bonds: 2

Acceptors: 6

Donors: 4

## Model Prediction

**Prediction:** Degradable

Probability: 0.598

Enrichment: 1.370

Bayesian Score: 2.263

Mahalanobis Distance: 10.792

Mahalanobis Distance p-value: 0.0261

Prediction: Positive if the Bayesian score is above the estimated best cutoff value from minimizing the false positive and false negative rate.

Probability: The estimated probability that the sample is in the positive category. This assumes that the Bayesian score follows a normal distribution and is different from the prediction using a cutoff.

Enrichment: An estimate of enrichment, that is, the increased likelihood (versus random) of this sample being in the category.

Bayesian Score: The standard Laplacian-modified Bayesian score.

Mahalanobis Distance: The Mahalanobis distance (MD) is the distance to the center of the training data. The larger the MD, the less trustworthy the prediction.

Mahalanobis Distance p-value: The p-value gives the fraction of training data with an MD greater than or equal to the one for the given sample, assuming normally distributed data. The smaller the p-value, the less trustworthy the prediction. For highly non-normal X properties (e.g., fingerprints), the MD p-value is wildly inaccurate.

## Structural Similar Compounds

| Name               | 1,3,5-Triazine-2,4,6(1H,3H,5H)-trione, 1,3,5-tris(2-hydroxyethyl)- | 1,3-Propanediol, 2,2-bis(hydroxymethyl)-                     | Benzenesulfonic acid, 4,4'-oxybis-, dihydrazide              |
|--------------------|--------------------------------------------------------------------|--------------------------------------------------------------|--------------------------------------------------------------|
| Structure          |                                                                    |                                                              |                                                              |
| Actual Endpoint    | Non-Degradable                                                     | Non-Degradable                                               | Non-Degradable                                               |
| Predicted Endpoint | Non-Degradable                                                     | Degradable                                                   | Non-Degradable                                               |
| Distance           | 0.708                                                              | 0.772                                                        | 0.787                                                        |
| Reference          | Environmental Toxicology & Chemistry 18(9), 1763-1768, 1999.       | Environmental Toxicology & Chemistry 18(9), 1763-1768, 1999. | Environmental Toxicology & Chemistry 18(9), 1763-1768, 1999. |

## Model Applicability

Unknown features are fingerprint features in the query molecule, but not found in the training set.

- All properties and OPS components are within expected ranges.

## Feature Contribution

### Top features for positive contribution

| Fingerprint | Bit/Smiles | Feature Structure | Score | Degradable in training set |
|-------------|------------|-------------------|-------|----------------------------|
| SCFP_12     | -424515134 | <br>[*]C([*])O    | 0.648 | 87 out of 111              |

| SCFP_12                                | -1971196727 | 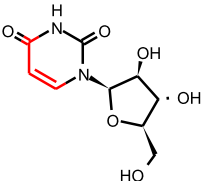<br><chem>[*]C=C/C(=[*])[*]</chem>            | 0.621  | 22 out of 28               |
|----------------------------------------|-------------|----------------------------------------------------------------------------------------------------------------------------------|--------|----------------------------|
| SCFP_12                                | -188384666  | <br><chem>[*][C@H]1[*][*]O[C@@H]1CO</chem>    | 0.590  | 3 out of 3                 |
| Top Features for negative contribution |             |                                                                                                                                  |        |                            |
| Fingerprint                            | Bit/Smiles  | Feature Structure                                                                                                                | Score  | Degradable in training set |
| SCFP_12                                | 1256786467  | <br><chem>[*]NC(=O)N([*])[*]</chem>           | -0.541 | 1 out of 6                 |
| SCFP_12                                | 399659969   | <br><chem>[*]C([*])N(C=[*])C(=[*])[*]</chem> | -0.341 | 0 out of 1                 |
| SCFP_12                                | 1631785938  | <br><chem>[*]C(=[*])NC(=[*])[*]</chem>      | -0.271 | 1 out of 4                 |

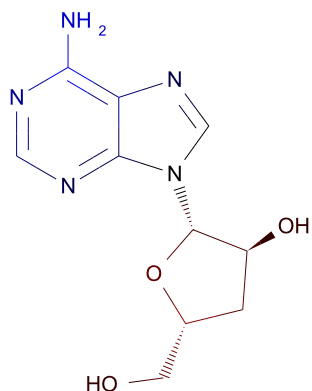
 $C_{10}H_{13}N_5O_3$ 

Molecular Weight: 251.24191

ALogP: -1.308

Rotatable Bonds: 2

Acceptors: 7

Donors: 3

## Model Prediction

Prediction: Non-Degradable

Probability: 0.250

Enrichment: 0.572

Bayesian Score: -5.613

Mahalanobis Distance: 16.522

Mahalanobis Distance p-value: 3.06e-017

Prediction: Positive if the Bayesian score is above the estimated best cutoff value from minimizing the false positive and false negative rate.

Probability: The estimated probability that the sample is in the positive category. This assumes that the Bayesian score follows a normal distribution and is different from the prediction using a cutoff.

Enrichment: An estimate of enrichment, that is, the increased likelihood (versus random) of this sample being in the category.

Bayesian Score: The standard Laplacian-modified Bayesian score.

Mahalanobis Distance: The Mahalanobis distance (MD) is the distance to the center of the training data. The larger the MD, the less trustworthy the prediction.

Mahalanobis Distance p-value: The p-value gives the fraction of training data with an MD greater than or equal to the one for the given sample, assuming normally distributed data. The smaller the p-value, the less trustworthy the prediction. For highly non-normal X properties (e.g., fingerprints), the MD p-value is wildly inaccurate.

## Structural Similar Compounds

| Name               | 1,3,5-Triazine-2,4,6(1H,3H,5H)-trione, 1,3,5-tris(2-hydroxyethyl)- | Glycine, N,N-bis(carboxymethyl)-                             | 2-Naphthalenesulfonic acid, 6-amino-4-hydroxy-               |
|--------------------|--------------------------------------------------------------------|--------------------------------------------------------------|--------------------------------------------------------------|
| Structure          |                                                                    |                                                              |                                                              |
| Actual Endpoint    | Non-Degradable                                                     | Non-Degradable                                               | Non-Degradable                                               |
| Predicted Endpoint | Non-Degradable                                                     | Non-Degradable                                               | Non-Degradable                                               |
| Distance           | 0.656                                                              | 0.769                                                        | 0.773                                                        |
| Reference          | Environmental Toxicology & Chemistry 18(9), 1763-1768, 1999.       | Environmental Toxicology & Chemistry 18(9), 1763-1768, 1999. | Environmental Toxicology & Chemistry 18(9), 1763-1768, 1999. |

## Model Applicability

Unknown features are fingerprint features in the query molecule, but not found in the training set.

- OPS PC13 out of range. Value: -4.9259. Training min, max, SD, explained variance: -3.586, 5.704, 1.413, 0.0229.

## Feature Contribution

### Top features for positive contribution

| Fingerprint | Bit/Smiles | Feature Structure           | Score | Degradable in training set |
|-------------|------------|-----------------------------|-------|----------------------------|
| SCFP_12     | -424515134 | <br><chem>[*]C([*])O</chem> | 0.648 | 87 out of 111              |

| SCFP_12                                | -188384666  | 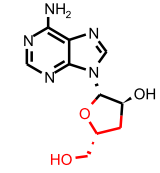<br><chem>[*][C@H]1[*][*]O[C@@H]1CO</chem>              | 0.590  | 3 out of 3                 |
|----------------------------------------|-------------|--------------------------------------------------------------------------------------------------------------------------------------------|--------|----------------------------|
| SCFP_12                                | -1272798659 | <br><chem>[*][C@@H]1[*][*]CC1</chem>                    | 0.518  | 160 out of 234             |
| Top Features for negative contribution |             |                                                                                                                                            |        |                            |
| Fingerprint                            | Bit/Smiles  | Feature Structure                                                                                                                          | Score  | Degradable in training set |
| SCFP_12                                | 10          | <br><chem>[*]N</chem>                                   | -1.607 | 11 out of 145              |
| SCFP_12                                | 384920865   | <br><chem>[*]:[c]([*])N</chem>                         | -1.364 | 6 out of 65                |
| SCFP_12                                | 112554633   | <br><chem>[*][c]([*]):[c]1:n:[*]:[*]:[c]:1:[*]</chem> | -1.077 | 1 out of 12                |

# Ribavirin

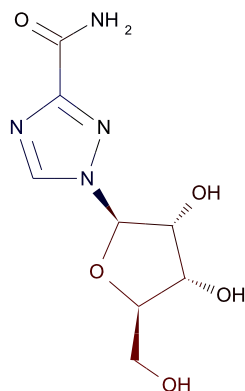

$C_8H_{12}N_4O_5$

Molecular Weight: 244.20467

ALogP: -2.745

Rotatable Bonds: 3

Acceptors: 7

Donors: 4

## Model Prediction

**Prediction: Degradable**

Probability: 0.511

Enrichment: 1.171

Bayesian Score: 0.442

Mahalanobis Distance: 14.890

Mahalanobis Distance p-value: 1.26e-011

Prediction: Positive if the Bayesian score is above the estimated best cutoff value from minimizing the false positive and false negative rate.

Probability: The estimated probability that the sample is in the positive category. This assumes that the Bayesian score follows a normal distribution and is different from the prediction using a cutoff.

Enrichment: An estimate of enrichment, that is, the increased likelihood (versus random) of this sample being in the category.

Bayesian Score: The standard Laplacian-modified Bayesian score.

Mahalanobis Distance: The Mahalanobis distance (MD) is the distance to the center of the training data. The larger the MD, the less trustworthy the prediction.

Mahalanobis Distance p-value: The p-value gives the fraction of training data with an MD greater than or equal to the one for the given sample, assuming normally distributed data. The smaller the p-value, the less trustworthy the prediction. For highly non-normal X properties (e.g., fingerprints), the MD p-value is wildly inaccurate.

# TOPKAT\_Aerobic\_Biodegradability

## Structural Similar Compounds

| Name               | Glycine, _N,N-bis(carboxymethyl)-                            | H_Acid                                                       | Benzenesulfonic acid, _4, 4'-oxybis-,_dihydrazide            |
|--------------------|--------------------------------------------------------------|--------------------------------------------------------------|--------------------------------------------------------------|
| Structure          |                                                              |                                                              |                                                              |
| Actual Endpoint    | Non-Degradable                                               | Non-Degradable                                               | Non-Degradable                                               |
| Predicted Endpoint | Non-Degradable                                               | Non-Degradable                                               | Non-Degradable                                               |
| Distance           | 0.752                                                        | 0.768                                                        | 0.770                                                        |
| Reference          | Environmental Toxicology & Chemistry 18(9), 1763-1768, 1999. | Environmental Toxicology & Chemistry 18(9), 1763-1768, 1999. | Environmental Toxicology & Chemistry 18(9), 1763-1768, 1999. |

## Model Applicability

Unknown features are fingerprint features in the query molecule, but not found in the training set.

- OPS PC13 out of range. Value: -4.125. Training min, max, SD, explained variance: -3.586, 5.704, 1.413, 0.0229.

## Feature Contribution

| Top features for positive contribution |            |                   |       |                            |
|----------------------------------------|------------|-------------------|-------|----------------------------|
| Fingerprint                            | Bit/Smiles | Feature Structure | Score | Degradable in training set |
| SCFP_12                                | -424515134 | <br>[*]C([*])O    | 0.648 | 87 out of 111              |



| SCFP_12                                | -188384666  | 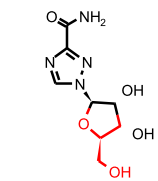<br><chem>[*][C@H]1[*][*]O[C@@H]1CO</chem>  | 0.590  | 3 out of 3                 |
|----------------------------------------|-------------|-------------------------------------------------------------------------------------------------------------------------------|--------|----------------------------|
| SCFP_12                                | -711686199  | <br><chem>[*]C([*])CO</chem>               | 0.490  | 106 out of 159             |
| Top Features for negative contribution |             |                                                                                                                               |        |                            |
| Fingerprint                            | Bit/Smiles  | Feature Structure                                                                                                             | Score  | Degradable in training set |
| SCFP_12                                | -1181430618 | <br><chem>[*]:n:[cH]:n:[*]</chem>          | -0.594 | 0 out of 2                 |
| SCFP_12                                | 1257084377  | <br><chem>[*]:[c](:[*])C(=O)N</chem>      | -0.541 | 1 out of 6                 |
| SCFP_12                                | 149003983   | <br><chem>[*][c](:[*]):n:[cH]:[*]</chem> | -0.497 | 8 out of 34                |

AND Enantiomer

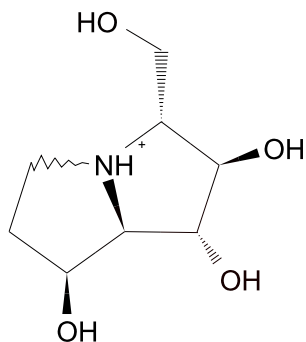 $C_8H_{16}NO_4$ 

Molecular Weight: 190.21693

ALogP: -3.556

Rotatable Bonds: 1

Acceptors: 4

Donors: 5

## Model Prediction

**Prediction: Toxic**

Probability: 0.584

Enrichment: 1.110

Bayesian Score: 0.944

Mahalanobis Distance: 7.814

Mahalanobis Distance p-value: 0.693

Prediction: Positive if the Bayesian score is above the estimated best cutoff value from minimizing the false positive and false negative rate.

Probability: The estimated probability that the sample is in the positive category. This assumes that the Bayesian score follows a normal distribution and is different from the prediction using a cutoff.

Enrichment: An estimate of enrichment, that is, the increased likelihood (versus random) of this sample being in the category.

Bayesian Score: The standard Laplacian-modified Bayesian score.

Mahalanobis Distance: The Mahalanobis distance (MD) is the distance to the center of the training data. The larger the MD, the less trustworthy the prediction.

Mahalanobis Distance p-value: The p-value gives the fraction of training data with an MD greater than or equal to the one for the given sample, assuming normally distributed data. The smaller the p-value, the less trustworthy the prediction. For highly non-normal X properties (e.g., fingerprints), the MD p-value is wildly inaccurate.

## Structural Similar Compounds

| Name               | Bredinin                       | Ribavirin                     | Vidarabine                    |
|--------------------|--------------------------------|-------------------------------|-------------------------------|
| Structure          |                                |                               |                               |
| Actual Endpoint    | Toxic                          | Toxic                         | Non-Toxic                     |
| Predicted Endpoint | Toxic                          | Toxic                         | Non-Toxic                     |
| Distance           | 0.784                          | 0.798                         | 0.827                         |
| Reference          | Oyo Yakuri 26(3):377-381; 1983 | Teratology 17(1):93-101; 1978 | Teratology 15(3):231-41; 1977 |

## Model Applicability

Unknown features are fingerprint features in the query molecule, but not found in the training set.

1. All properties and OPS components are within expected ranges.

## Feature Contribution

### Top features for positive contribution

| Fingerprint | Bit/Smiles | Feature Structure | Score | Toxic in training set |
|-------------|------------|-------------------|-------|-----------------------|
| SCFP_6      | -424515134 | <br>[*]C([*])O    | 0.275 | 39 out of 56          |

| SCFP_6                                 | 1702634808  | 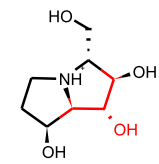<br><chem>[*][C@@H]1[*][*][C@H]([*])[C@H]1O</chem> | 0.159 | 26 out of 42          |
|----------------------------------------|-------------|--------------------------------------------------------------------------------------------------------------------------------------|-------|-----------------------|
| SCFP_6                                 | -1272798659 | <br><chem>[*][C@@H]1[*][*]CC1</chem>              | 0.071 | 44 out of 78          |
| Top Features for negative contribution |             |                                                                                                                                      |       |                       |
| Fingerprint                            | Bit/Smiles  | Feature Structure                                                                                                                    | Score | Toxic in training set |
| SCFP_6                                 | 12          | <br><chem>[*]O</chem>                             | 0.000 | 97 out of 178         |
| SCFP_6                                 | 0           | <br><chem>[*]C([*])[*]</chem>                    | 0.000 | 122 out of 230        |

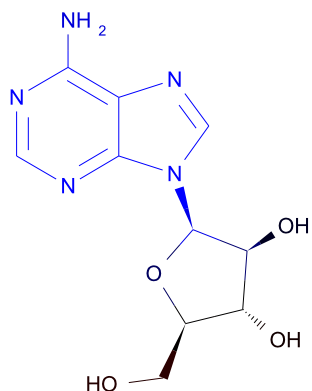

$C_{10}H_{13}N_5O_4$

Molecular Weight: 267.24132

ALogP: -1.881

Rotatable Bonds: 2

Acceptors: 8

Donors: 4

## Model Prediction

Prediction: Non-Toxic

Probability: 0.281

Enrichment: 0.534

Bayesian Score: -9.108

Mahalanobis Distance: 7.347

Mahalanobis Distance p-value: 0.866

Prediction: Positive if the Bayesian score is above the estimated best cutoff value from minimizing the false positive and false negative rate.

Probability: The estimated probability that the sample is in the positive category. This assumes that the Bayesian score follows a normal distribution and is different from the prediction using a cutoff.

Enrichment: An estimate of enrichment, that is, the increased likelihood (versus random) of this sample being in the category.

Bayesian Score: The standard Laplacian-modified Bayesian score.

Mahalanobis Distance: The Mahalanobis distance (MD) is the distance to the center of the training data. The larger the MD, the less trustworthy the prediction.

Mahalanobis Distance p-value: The p-value gives the fraction of training data with an MD greater than or equal to the one for the given sample, assuming normally distributed data. The smaller the p-value, the less trustworthy the prediction. For highly non-normal X properties (e.g., fingerprints), the MD p-value is wildly inaccurate.

## Structural Similar Compounds

| Name               | Vidarabine                    | Bredinin                       | Ribavirin                     |
|--------------------|-------------------------------|--------------------------------|-------------------------------|
| Structure          |                               |                                |                               |
| Actual Endpoint    | Non-Toxic                     | Toxic                          | Toxic                         |
| Predicted Endpoint | Non-Toxic                     | Toxic                          | Toxic                         |
| Distance           | 0.000                         | 0.513                          | 0.527                         |
| Reference          | Teratology 15(3):231-41; 1977 | Oyo Yakuri 26(3):377-381; 1983 | Teratology 17(1):93-101; 1978 |

## Model Applicability

Unknown features are fingerprint features in the query molecule, but not found in the training set.

1. All properties and OPS components are within expected ranges.

## Feature Contribution

### Top features for positive contribution

| Fingerprint | Bit/Smiles  | Feature Structure | Score | Toxic in training set |
|-------------|-------------|-------------------|-------|-----------------------|
| SCFP_6      | -1486266146 |                   | 0.431 | 7 out of 8            |

[\*]C[C@H]1O[C@@H]([\*])  
[C@@H](O)[C@@H]1O

| SCFP_6                                 | -188384666  | 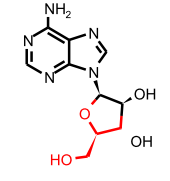<br><chem>[*][C@H]1[*][*]O[C@@H]1CO</chem>                                                     | 0.431  | 7 out of 8            |
|----------------------------------------|-------------|-----------------------------------------------------------------------------------------------------------------------------------------------------------------------------------|--------|-----------------------|
| SCFP_6                                 | -1181430618 | <br><chem>[*]:n:[cH]:n:[*]</chem>                                                              | 0.298  | 6 out of 8            |
| Top Features for negative contribution |             |                                                                                                                                                                                   |        |                       |
| Fingerprint                            | Bit/Smiles  | Feature Structure                                                                                                                                                                 | Score  | Toxic in training set |
| SCFP_6                                 | -572674910  | <br><chem>[*]n1:[*]:[*]:[c](:[*]):[c]:1:n:[*]</chem>                                           | -0.945 | 0 out of 3            |
| SCFP_6                                 | 41215856    | <br><chem>[*][C@H]1O[C@H]([C@@H](O)[C@H]1O)n2:cH]:n:[c]3:c:[c]([*]):[*]:[cH]:n:[c]:2:3</chem> | -0.718 | 0 out of 2            |
| SCFP_6                                 | 1607737603  | <br><chem>[*][C@H]1[*][*]O[C@H]1n2:[cH]:n:[c]([*]):[c]:2:n:[*]</chem>                        | -0.718 | 0 out of 2            |

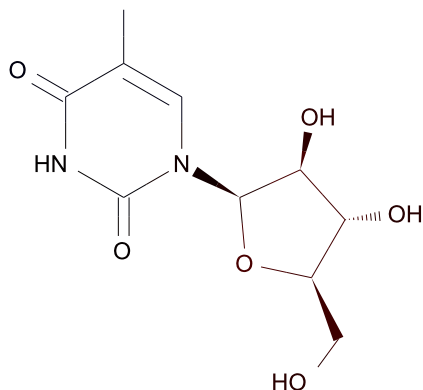

$C_{10}H_{14}N_2O_6$

Molecular Weight: 258.22795

ALogP: -2.005

Rotatable Bonds: 2

Acceptors: 6

Donors: 4

## Model Prediction

Prediction: Toxic

Probability: 0.610

Enrichment: 1.160

Bayesian Score: 1.621

Mahalanobis Distance: 7.635

Mahalanobis Distance p-value: 0.768

Prediction: Positive if the Bayesian score is above the estimated best cutoff value from minimizing the false positive and false negative rate.

Probability: The estimated probability that the sample is in the positive category. This assumes that the Bayesian score follows a normal distribution and is different from the prediction using a cutoff.

Enrichment: An estimate of enrichment, that is, the increased likelihood (versus random) of this sample being in the category.

Bayesian Score: The standard Laplacian-modified Bayesian score.

Mahalanobis Distance: The Mahalanobis distance (MD) is the distance to the center of the training data. The larger the MD, the less trustworthy the prediction.

Mahalanobis Distance p-value: The p-value gives the fraction of training data with an MD greater than or equal to the one for the given sample, assuming normally distributed data. The smaller the p-value, the less trustworthy the prediction. For highly non-normal X properties (e.g., fingerprints), the MD p-value is wildly inaccurate.

## Structural Similar Compounds

| Name               | Vidarabine                    | Ribavirin                     | Bredinin                       |
|--------------------|-------------------------------|-------------------------------|--------------------------------|
| Structure          |                               |                               |                                |
| Actual Endpoint    | Non-Toxic                     | Toxic                         | Toxic                          |
| Predicted Endpoint | Non-Toxic                     | Toxic                         | Toxic                          |
| Distance           | 0.596                         | 0.607                         | 0.634                          |
| Reference          | Teratology 15(3):231-41; 1977 | Teratology 17(1):93-101; 1978 | Oyo Yakuri 26(3):377-381; 1983 |

## Model Applicability

Unknown features are fingerprint features in the query molecule, but not found in the training set.

1. All properties and OPS components are within expected ranges.

## Feature Contribution

### Top features for positive contribution

| Fingerprint | Bit/Smiles | Feature Structure                     | Score | Toxic in training set |
|-------------|------------|---------------------------------------|-------|-----------------------|
| SCFP_6      | -188384666 | <br><chem>[*]C@H1[*]O[C@@H]1CO</chem> | 0.431 | 7 out of 8            |

| SCFP_6                                 | -1486266146 | 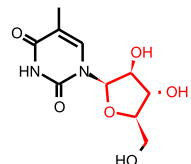<br><chem>[*]C[C@H]1O[C@@H]([*])C@H](O)[C@@H]1O</chem> | 0.431  | 7 out of 8            |
|----------------------------------------|-------------|------------------------------------------------------------------------------------------------------------------------------------------|--------|-----------------------|
| SCFP_6                                 | -1971435055 | <br><chem>[*]N([*])C=C([*])[*]</chem>                 | 0.381  | 2 out of 2            |
| Top Features for negative contribution |             |                                                                                                                                          |        |                       |
| Fingerprint                            | Bit/Smiles  | Feature Structure                                                                                                                        | Score  | Toxic in training set |
| SCFP_6                                 | 399659969   | <br><chem>[*]C([*])N(C=[*])C(=[*])C([*])</chem>       | -0.526 | 3 out of 11           |
| SCFP_6                                 | 1257024795  | <br><chem>[*]NC(=O)C(=[*])[*]</chem>                 | -0.303 | 4 out of 11           |
| SCFP_6                                 | 55464376    | <br><chem>[*]C=C(C)C(=[*])[*]</chem>                | -0.252 | 1 out of 3            |

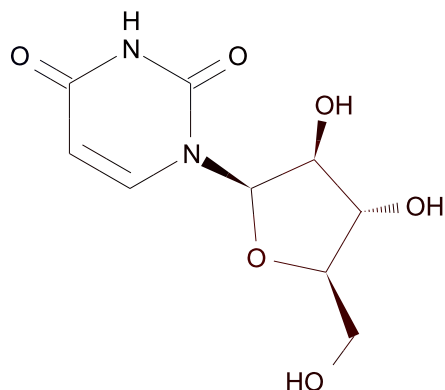

$C_9H_{12}N_2O_6$   
 Molecular Weight: 244.20137  
 ALogP: -2.451  
 Rotatable Bonds: 2  
 Acceptors: 6  
 Donors: 4

## Model Prediction

**Prediction: Toxic**

Probability: 0.641

Enrichment: 1.219

Bayesian Score: 2.411

Mahalanobis Distance: 7.919

Mahalanobis Distance p-value: 0.645

Prediction: Positive if the Bayesian score is above the estimated best cutoff value from minimizing the false positive and false negative rate.

Probability: The estimated probability that the sample is in the positive category. This assumes that the Bayesian score follows a normal distribution and is different from the prediction using a cutoff.

Enrichment: An estimate of enrichment, that is, the increased likelihood (versus random) of this sample being in the category.

Bayesian Score: The standard Laplacian-modified Bayesian score.

Mahalanobis Distance: The Mahalanobis distance (MD) is the distance to the center of the training data. The larger the MD, the less trustworthy the prediction.

Mahalanobis Distance p-value: The p-value gives the fraction of training data with an MD greater than or equal to the one for the given sample, assuming normally distributed data. The smaller the p-value, the less trustworthy the prediction. For highly non-normal X properties (e.g., fingerprints), the MD p-value is wildly inaccurate.

## Structural Similar Compounds

| Name               | Ribavirin                     | Vidarabine                    | Bredinin                       |
|--------------------|-------------------------------|-------------------------------|--------------------------------|
| Structure          |                               |                               |                                |
| Actual Endpoint    | Toxic                         | Non-Toxic                     | Toxic                          |
| Predicted Endpoint | Toxic                         | Non-Toxic                     | Toxic                          |
| Distance           | 0.543                         | 0.586                         | 0.590                          |
| Reference          | Teratology 17(1):93-101; 1978 | Teratology 15(3):231-41; 1977 | Oyo Yakuri 26(3):377-381; 1983 |

## Model Applicability

Unknown features are fingerprint features in the query molecule, but not found in the training set.

1. All properties and OPS components are within expected ranges.

## Feature Contribution

### Top features for positive contribution

| Fingerprint | Bit/Smiles | Feature Structure                     | Score | Toxic in training set |
|-------------|------------|---------------------------------------|-------|-----------------------|
| SCFP_6      | -188384666 | <br><chem>[*]C@H1[*]O[C@@H]1CO</chem> | 0.431 | 7 out of 8            |



| SCFP_6                                 | -1486266146 | 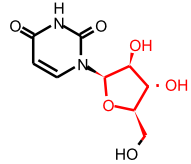<br><chem>[*]C[C@H]1O[C@@H]([*])C@@H](O)[C@@H]1O</chem> | 0.431  | 7 out of 8            |
|----------------------------------------|-------------|--------------------------------------------------------------------------------------------------------------------------------------------|--------|-----------------------|
| SCFP_6                                 | -1971435055 | <br><chem>[*]N([*])C=C([*])[*]</chem>                   | 0.381  | 2 out of 2            |
| Top Features for negative contribution |             |                                                                                                                                            |        |                       |
| Fingerprint                            | Bit/Smiles  | Feature Structure                                                                                                                          | Score  | Toxic in training set |
| SCFP_6                                 | 399659969   | <br><chem>[*]C([*])N(C=[*])C(=[*])[*]</chem>            | -0.526 | 3 out of 11           |
| SCFP_6                                 | 1257024795  | <br><chem>[*]NC(=O)C(=[*])[*]</chem>                   | -0.303 | 4 out of 11           |
| SCFP_6                                 | 0           | <br><chem>[*]C([*])[*]</chem>                         | 0.000  | 122 out of 230        |

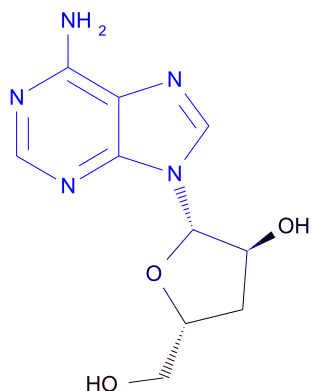

$C_{10}H_{13}N_5O_3$

Molecular Weight: 251.24191

ALogP: -1.308

Rotatable Bonds: 2

Acceptors: 7

Donors: 3

## Model Prediction

Prediction: Non-Toxic

Probability: 0.283

Enrichment: 0.538

Bayesian Score: -9.029

Mahalanobis Distance: 7.929

Mahalanobis Distance p-value: 0.64

Prediction: Positive if the Bayesian score is above the estimated best cutoff value from minimizing the false positive and false negative rate.

Probability: The estimated probability that the sample is in the positive category. This assumes that the Bayesian score follows a normal distribution and is different from the prediction using a cutoff.

Enrichment: An estimate of enrichment, that is, the increased likelihood (versus random) of this sample being in the category.

Bayesian Score: The standard Laplacian-modified Bayesian score.

Mahalanobis Distance: The Mahalanobis distance (MD) is the distance to the center of the training data. The larger the MD, the less trustworthy the prediction.

Mahalanobis Distance p-value: The p-value gives the fraction of training data with an MD greater than or equal to the one for the given sample, assuming normally distributed data. The smaller the p-value, the less trustworthy the prediction. For highly non-normal X properties (e.g., fingerprints), the MD p-value is wildly inaccurate.

## Structural Similar Compounds

| Name               | Vidarabine                    | Ribavirin                     | Bredinin                       |
|--------------------|-------------------------------|-------------------------------|--------------------------------|
| Structure          |                               |                               |                                |
| Actual Endpoint    | Non-Toxic                     | Toxic                         | Toxic                          |
| Predicted Endpoint | Non-Toxic                     | Toxic                         | Toxic                          |
| Distance           | 0.314                         | 0.666                         | 0.713                          |
| Reference          | Teratology 15(3):231-41; 1977 | Teratology 17(1):93-101; 1978 | Oyo Yakuri 26(3):377-381; 1983 |

## Model Applicability

Unknown features are fingerprint features in the query molecule, but not found in the training set.

1. All properties and OPS components are within expected ranges.

## Feature Contribution

### Top features for positive contribution

| Fingerprint | Bit/Smiles | Feature Structure                     | Score | Toxic in training set |
|-------------|------------|---------------------------------------|-------|-----------------------|
| SCFP_6      | -188384666 | <br><chem>[*]C@H1[*]O[C@@H]1CO</chem> | 0.431 | 7 out of 8            |

| SCFP_6                                 | -1181430618 | 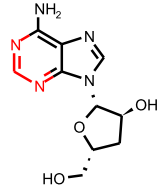<br>[*]:n:[cH]:n:[*]                                                                   | 0.298  | 6 out of 8            |
|----------------------------------------|-------------|---------------------------------------------------------------------------------------------------------------------------------------------------------------------------|--------|-----------------------|
| SCFP_6                                 | -424515134  | <br>[*]C([*])O                                                                         | 0.275  | 39 out of 56          |
| Top Features for negative contribution |             |                                                                                                                                                                           |        |                       |
| Fingerprint                            | Bit/Smiles  | Feature Structure                                                                                                                                                         | Score  | Toxic in training set |
| SCFP_6                                 | -572674910  | <br>[*]n1:[*]:[*]:[c](:[*]):[c]:1:n:[*]                                                | -0.945 | 0 out of 3            |
| SCFP_6                                 | 41215856    | <br>[*][C@H]1O[C@H]([C@H]([C@H]1O)[C@H]([*])n2:[cH]:n:[c]3:[c]([*]):[*][cH]:n:[c]:2:3 | -0.718 | 0 out of 2            |
| SCFP_6                                 | 2142015375  | <br>[*]n1:[cH]:n:[c](:[c]([*]):[*]):[c]:1:[*]                                        | -0.718 | 0 out of 2            |

# Ribavirin

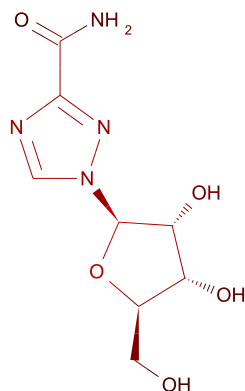

$C_8H_{12}N_4O_5$

Molecular Weight: 244.20467

ALogP: -2.745

Rotatable Bonds: 3

Acceptors: 7

Donors: 4

## Model Prediction

**Prediction: Toxic**

Probability: 0.791

Enrichment: 1.503

Bayesian Score: 6.415

Mahalanobis Distance: 6.567

Mahalanobis Distance p-value: 0.985

Prediction: Positive if the Bayesian score is above the estimated best cutoff value from minimizing the false positive and false negative rate.

Probability: The estimated probability that the sample is in the positive category. This assumes that the Bayesian score follows a normal distribution and is different from the prediction using a cutoff.

Enrichment: An estimate of enrichment, that is, the increased likelihood (versus random) of this sample being in the category.

Bayesian Score: The standard Laplacian-modified Bayesian score.

Mahalanobis Distance: The Mahalanobis distance (MD) is the distance to the center of the training data. The larger the MD, the less trustworthy the prediction.

Mahalanobis Distance p-value: The p-value gives the fraction of training data with an MD greater than or equal to the one for the given sample, assuming normally distributed data. The smaller the p-value, the less trustworthy the prediction. For highly non-normal X properties (e.g., fingerprints), the MD p-value is wildly inaccurate.

# TOPKAT\_Developmental\_Toxicity\_Potential

## Structural Similar Compounds

| Name               | Ribavirin                     | Bredinin                       | Vidarabine                    |
|--------------------|-------------------------------|--------------------------------|-------------------------------|
| Structure          |                               |                                |                               |
| Actual Endpoint    | Toxic                         | Toxic                          | Non-Toxic                     |
| Predicted Endpoint | Toxic                         | Toxic                          | Non-Toxic                     |
| Distance           | 0.000                         | 0.436                          | 0.527                         |
| Reference          | Teratology 17(1):93-101; 1978 | Oyo Yakuri 26(3):377-381; 1983 | Teratology 15(3):231-41; 1977 |

## Model Applicability

Unknown features are fingerprint features in the query molecule, but not found in the training set.

1. All properties and OPS components are within expected ranges.

## Feature Contribution

### Top features for positive contribution

| Fingerprint | Bit/Smiles  | Feature Structure | Score | Toxic in training set |
|-------------|-------------|-------------------|-------|-----------------------|
| SCFP_6      | -1357949052 |                   | 0.453 | 8 out of 9            |

[\*]C(=[\*])N

|                                        |             |                                                                                                                                          |        |                       |
|----------------------------------------|-------------|------------------------------------------------------------------------------------------------------------------------------------------|--------|-----------------------|
| SCFP_6                                 | -1486266146 | 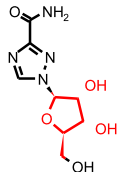 <chem>[*]C[C@H]1O[C@@H]([*])C[C@H](O)[C@@H]1O</chem> | 0.431  | 7 out of 8            |
| SCFP_6                                 | -188384666  |  <chem>[*][C@H]1[*][*]O[C@@H]1CO</chem>               | 0.431  | 7 out of 8            |
| Top Features for negative contribution |             |                                                                                                                                          |        |                       |
| Fingerprint                            | Bit/Smiles  | Feature Structure                                                                                                                        | Score  | Toxic in training set |
| SCFP_6                                 | 149212520   |  <chem>[*]n1:[*]:[*]:[c]([*])n:1</chem>               | -0.448 | 5 out of 16           |
| SCFP_6                                 | -443296553  |  <chem>[*]C([*])n1:[cH]:[*]:[*]:n:1</chem>           | -0.324 | 2 out of 6            |
| SCFP_6                                 | 8           |  <chem>[*]:n:[*]</chem>                             | -0.278 | 24 out of 61          |

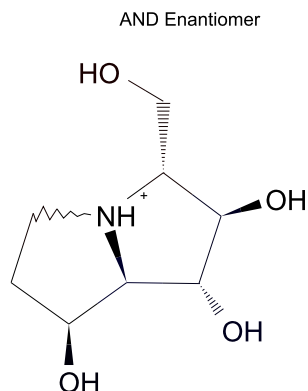

$C_8H_{16}NO_4$   
 Molecular Weight: 190.21693  
 ALogP: -3.556  
 Rotatable Bonds: 1  
 Acceptors: 4  
 Donors: 5

## Model Prediction

Prediction: Non-Carcinogen

Probability: 0.245

Enrichment: 0.765

Bayesian Score: -0.985

Mahalanobis Distance: 9.503

Mahalanobis Distance p-value: 0.674

Prediction: Positive if the Bayesian score is above the estimated best cutoff value from minimizing the false positive and false negative rate.

Probability: The estimated probability that the sample is in the positive category. This assumes that the Bayesian score follows a normal distribution and is different from the prediction using a cutoff.

Enrichment: An estimate of enrichment, that is, the increased likelihood (versus random) of this sample being in the category.

Bayesian Score: The standard Laplacian-modified Bayesian score.

Mahalanobis Distance: The Mahalanobis distance (MD) is the distance to the center of the training data. The larger the MD, the less trustworthy the prediction.

Mahalanobis Distance p-value: The p-value gives the fraction of training data with an MD greater than or equal to the one for the given sample, assuming normally distributed data. The smaller the p-value, the less trustworthy the prediction. For highly non-normal X properties (e.g., fingerprints), the MD p-value is wildly inaccurate.

## Structural Similar Compounds

| Name               | Methyldopa                                                          | Ribavirin                                                           | Ascorbic acid                                                       |
|--------------------|---------------------------------------------------------------------|---------------------------------------------------------------------|---------------------------------------------------------------------|
| Structure          |                                                                     |                                                                     |                                                                     |
| Actual Endpoint    | Non-Carcinogen                                                      | Non-Carcinogen                                                      | Non-Carcinogen                                                      |
| Predicted Endpoint | Non-Carcinogen                                                      | Non-Carcinogen                                                      | Non-Carcinogen                                                      |
| Distance           | 0.749                                                               | 0.831                                                               | 0.832                                                               |
| Reference          | US FDA (Centre for Drug Eval.& Res./Off. Testing & Res.) Sept. 1997 | US FDA (Centre for Drug Eval.& Res./Off. Testing & Res.) Sept. 1997 | US FDA (Centre for Drug Eval.& Res./Off. Testing & Res.) Sept. 1997 |

## Model Applicability

Unknown features are fingerprint features in the query molecule, but not found in the training set.

1. All properties and OPS components are within expected ranges.
2. Unknown ECFP\_2 feature: 1976330679: [\*][NH+]([\*])[\*]
3. Unknown ECFP\_2 feature: -1693770146: [\*][C@H]1[\*][\*][C@H]2[\*][\*][C[NH+]12
4. Unknown ECFP\_2 feature: -1395316370: [\*][C@H]1[\*][\*][NH+2][\*][\*][C@H]([\*])C12
5. Unknown ECFP\_2 feature: -705668329: [\*][C[C@H]1[C@H]([\*])[\*][\*][NH+]1[\*]
6. Unknown ECFP\_2 feature: -244159614: [\*][NH+]1[\*][\*]CC1

## Feature Contribution

### Top features for positive contribution

| Fingerprint | Bit/Smiles | Feature Structure            | Score | Carcinogen in training set |
|-------------|------------|------------------------------|-------|----------------------------|
| ECFP_6      | -85480422  | <br><chem>[*][C](*)CO</chem> | 0.337 | 3 out of 6                 |

| ECFP_6                                 | -1331450522 | 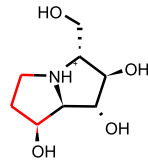<br><chem>[*][C@@H]1[*][*]CC1</chem>               | 0.238  | 25 out of 63               |
|----------------------------------------|-------------|---------------------------------------------------------------------------------------------------------------------------------------|--------|----------------------------|
| ECFP_6                                 | 2022454958  | <br><chem>[*]CO</chem>                             | 0.135  | 9 out of 25                |
| Top Features for negative contribution |             |                                                                                                                                       |        |                            |
| Fingerprint                            | Bit/Smiles  | Feature Structure                                                                                                                     | Score  | Carcinogen in training set |
| ECFP_6                                 | 305695353   | <br><chem>[*][C@@H]1[*][*][C@H]([*])[C@H]1O</chem> | -0.638 | 1 out of 9                 |
| ECFP_6                                 | -329826665  | <br><chem>[*][C@@H]1[*][*][C]C@H1O</chem>         | -0.232 | 2 out of 9                 |
| ECFP_6                                 | 1559650422  | <br><chem>[*]C[*]</chem>                         | -0.164 | 50 out of 191              |

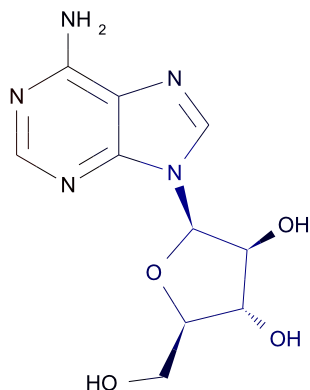

$C_{10}H_{13}N_5O_4$

Molecular Weight: 267.24132

ALogP: -1.881

Rotatable Bonds: 2

Acceptors: 8

Donors: 4

## Model Prediction

Prediction: Non-Carcinogen

Probability: 0.210

Enrichment: 0.654

Bayesian Score: -4.417

Mahalanobis Distance: 9.636

Mahalanobis Distance p-value: 0.614

Prediction: Positive if the Bayesian score is above the estimated best cutoff value from minimizing the false positive and false negative rate.

Probability: The estimated probability that the sample is in the positive category. This assumes that the Bayesian score follows a normal distribution and is different from the prediction using a cutoff.

Enrichment: An estimate of enrichment, that is, the increased likelihood (versus random) of this sample being in the category.

Bayesian Score: The standard Laplacian-modified Bayesian score.

Mahalanobis Distance: The Mahalanobis distance (MD) is the distance to the center of the training data. The larger the MD, the less trustworthy the prediction.

Mahalanobis Distance p-value: The p-value gives the fraction of training data with an MD greater than or equal to the one for the given sample, assuming normally distributed data. The smaller the p-value, the less trustworthy the prediction. For highly non-normal X properties (e.g., fingerprints), the MD p-value is wildly inaccurate.

## Structural Similar Compounds

| Name               | Ribavirin                                                           | Ganciclovir                                                         | Acyclovir                                                           |
|--------------------|---------------------------------------------------------------------|---------------------------------------------------------------------|---------------------------------------------------------------------|
| Structure          |                                                                     |                                                                     |                                                                     |
| Actual Endpoint    | Non-Carcinogen                                                      | Carcinogen                                                          | Non-Carcinogen                                                      |
| Predicted Endpoint | Non-Carcinogen                                                      | Carcinogen                                                          | Carcinogen                                                          |
| Distance           | 0.500                                                               | 0.645                                                               | 0.710                                                               |
| Reference          | US FDA (Centre for Drug Eval.& Res./Off. Testing & Res.) Sept. 1997 | US FDA (Centre for Drug Eval.& Res./Off. Testing & Res.) Sept. 1997 | US FDA (Centre for Drug Eval.& Res./Off. Testing & Res.) Sept. 1997 |

## Model Applicability

Unknown features are fingerprint features in the query molecule, but not found in the training set.

1. All properties and OPS components are within expected ranges.

## Feature Contribution

### Top features for positive contribution

| Fingerprint | Bit/Smiles  | Feature Structure                       | Score | Carcinogen in training set |
|-------------|-------------|-----------------------------------------|-------|----------------------------|
| ECFP_6      | -1448786963 | <br>[*][c]1:[*]:[c]([*])<br>:n:[cH]:n:1 | 0.424 | 1 out of 1                 |



| ECFP_6                                 | -85480422  | 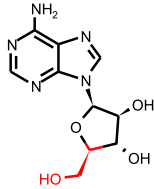<br><chem>[*]C([*])CO</chem>                              | 0.337  | 3 out of 6                 |
|----------------------------------------|------------|----------------------------------------------------------------------------------------------------------------------------------------------|--------|----------------------------|
| ECFP_6                                 | 683445015  | <br><chem>[*]O[*]</chem>                                  | 0.181  | 18 out of 48               |
| Top Features for negative contribution |            |                                                                                                                                              |        |                            |
| Fingerprint                            | Bit/Smiles | Feature Structure                                                                                                                            | Score  | Carcinogen in training set |
| ECFP_6                                 | 305695353  | <br><chem>[*][C@@H]1[*][*][C@H]([*])C@H1O</chem>          | -0.638 | 1 out of 9                 |
| ECFP_6                                 | 1811812564 | <br><chem>[*]C[C@H]1O[C@@H]([*])C@H([*])C@H1O</chem>     | -0.482 | 0 out of 2                 |
| ECFP_6                                 | -763075316 | <br><chem>[*][C@@H]1O[C@H](CO)[C@@H](O)[C@H]1[*]</chem> | -0.482 | 0 out of 2                 |

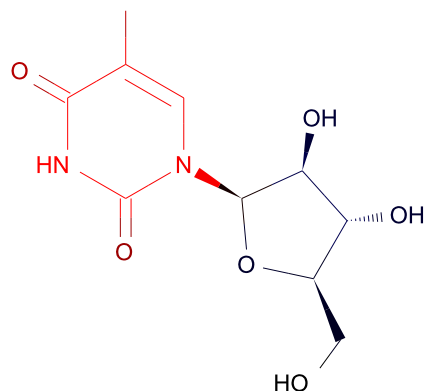
 $C_{10}H_{14}N_2O_6$ 

Molecular Weight: 258.22795

ALogP: -2.005

Rotatable Bonds: 2

Acceptors: 6

Donors: 4

## Model Prediction

**Prediction: Carcinogen**

Probability: 0.458

Enrichment: 1.429

Bayesian Score: 5.731

Mahalanobis Distance: 10.179

Mahalanobis Distance p-value: 0.365

Prediction: Positive if the Bayesian score is above the estimated best cutoff value from minimizing the false positive and false negative rate.

Probability: The estimated probability that the sample is in the positive category. This assumes that the Bayesian score follows a normal distribution and is different from the prediction using a cutoff.

Enrichment: An estimate of enrichment, that is, the increased likelihood (versus random) of this sample being in the category.

Bayesian Score: The standard Laplacian-modified Bayesian score.

Mahalanobis Distance: The Mahalanobis distance (MD) is the distance to the center of the training data. The larger the MD, the less trustworthy the prediction.

Mahalanobis Distance p-value: The p-value gives the fraction of training data with an MD greater than or equal to the one for the given sample, assuming normally distributed data. The smaller the p-value, the less trustworthy the prediction. For highly non-normal X properties (e.g., fingerprints), the MD p-value is wildly inaccurate.

## Structural Similar Compounds

| Name               | Zidovudine                                                          | Methyldopa                                                          | Ribavirin                                                           |
|--------------------|---------------------------------------------------------------------|---------------------------------------------------------------------|---------------------------------------------------------------------|
| Structure          |                                                                     |                                                                     |                                                                     |
| Actual Endpoint    | Carcinogen                                                          | Non-Carcinogen                                                      | Non-Carcinogen                                                      |
| Predicted Endpoint | Carcinogen                                                          | Non-Carcinogen                                                      | Non-Carcinogen                                                      |
| Distance           | 0.528                                                               | 0.597                                                               | 0.603                                                               |
| Reference          | US FDA (Centre for Drug Eval.& Res./Off. Testing & Res.) Sept. 1997 | US FDA (Centre for Drug Eval.& Res./Off. Testing & Res.) Sept. 1997 | US FDA (Centre for Drug Eval.& Res./Off. Testing & Res.) Sept. 1997 |

## Model Applicability

Unknown features are fingerprint features in the query molecule, but not found in the training set.

1. All properties and OPS components are within expected ranges.
2. Unknown ECFP\_2 feature: -627157165: [\*][C@H]1[\*][\*]O[C@H]1N([\*])([\*])

## Feature Contribution

### Top features for positive contribution

| Fingerprint | Bit/Smiles | Feature Structure                   | Score | Carcinogen in training set |
|-------------|------------|-------------------------------------|-------|----------------------------|
| ECFP_6      | 1526392165 | <br><chem>[*]NC(=O)N([*])[*]</chem> | 0.742 | 5 out of 6                 |

| ECFP_6                                 | -3067141   | 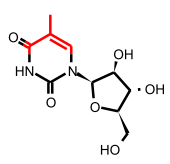<br><chem>[*]C=C(C(C)C(=[*]))[*]</chem>                                    | 0.675  | 4 out of 5                 |
|----------------------------------------|------------|---------------------------------------------------------------------------------------------------------------------------------------------------------------|--------|----------------------------|
| ECFP_6                                 | 1231005866 | <br><chem>[*]N1[*]=C([*])C(=O)N</chem><br><chem>C1=O</chem>                | 0.617  | 2 out of 2                 |
| Top Features for negative contribution |            |                                                                                                                                                               |        |                            |
| Fingerprint                            | Bit/Smiles | Feature Structure                                                                                                                                             | Score  | Carcinogen in training set |
| ECFP_6                                 | 305695353  | <br><chem>[*]C@@H1[*]1[*]C@H1</chem><br><chem>([*])C@H1O</chem>            | -0.638 | 1 out of 9                 |
| ECFP_6                                 | -763075316 | <br><chem>[*]C@@H1O[C@H](CO)[</chem><br><chem>C@@H](O)[C@@H]1[*]</chem>   | -0.482 | 0 out of 2                 |
| ECFP_6                                 | 1811812564 | <br><chem>[*]C[C@H]1O[C@@H]([*]</chem><br><chem>)C@@H](O)[C@@H]1O</chem> | -0.482 | 0 out of 2                 |

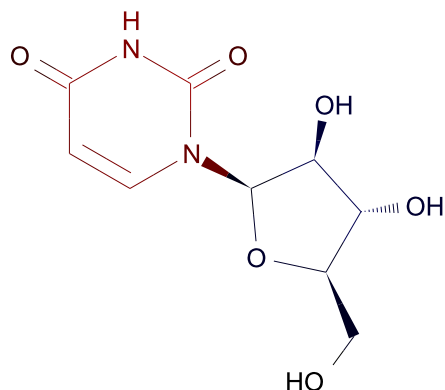

$C_9H_{12}N_2O_6$

Molecular Weight: 244.20137

ALogP: -2.451

Rotatable Bonds: 2

Acceptors: 6

Donors: 4

## Model Prediction

**Prediction: Carcinogen**

Probability: 0.335

Enrichment: 1.045

Bayesian Score: 2.736

Mahalanobis Distance: 9.889

Mahalanobis Distance p-value: 0.497

Prediction: Positive if the Bayesian score is above the estimated best cutoff value from minimizing the false positive and false negative rate.

Probability: The estimated probability that the sample is in the positive category. This assumes that the Bayesian score follows a normal distribution and is different from the prediction using a cutoff.

Enrichment: An estimate of enrichment, that is, the increased likelihood (versus random) of this sample being in the category.

Bayesian Score: The standard Laplacian-modified Bayesian score.

Mahalanobis Distance: The Mahalanobis distance (MD) is the distance to the center of the training data. The larger the MD, the less trustworthy the prediction.

Mahalanobis Distance p-value: The p-value gives the fraction of training data with an MD greater than or equal to the one for the given sample, assuming normally distributed data. The smaller the p-value, the less trustworthy the prediction. For highly non-normal X properties (e.g., fingerprints), the MD p-value is wildly inaccurate.

## Structural Similar Compounds

| Name               | Ribavirin                                                           | Methyldopa                                                          | Ascorbic acid                                                       |
|--------------------|---------------------------------------------------------------------|---------------------------------------------------------------------|---------------------------------------------------------------------|
| Structure          |                                                                     |                                                                     |                                                                     |
| Actual Endpoint    | Non-Carcinogen                                                      | Non-Carcinogen                                                      | Non-Carcinogen                                                      |
| Predicted Endpoint | Non-Carcinogen                                                      | Non-Carcinogen                                                      | Non-Carcinogen                                                      |
| Distance           | 0.542                                                               | 0.626                                                               | 0.645                                                               |
| Reference          | US FDA (Centre for Drug Eval.& Res./Off. Testing & Res.) Sept. 1997 | US FDA (Centre for Drug Eval.& Res./Off. Testing & Res.) Sept. 1997 | US FDA (Centre for Drug Eval.& Res./Off. Testing & Res.) Sept. 1997 |

## Model Applicability

Unknown features are fingerprint features in the query molecule, but not found in the training set.

1. All properties and OPS components are within expected ranges.
2. Unknown ECFP\_2 feature: -627157165: [\*][C@H]1[\*][\*]O[C@H]1N([\*])[\*]

## Feature Contribution

### Top features for positive contribution

| Fingerprint | Bit/Smiles | Feature Structure                   | Score | Carcinogen in training set |
|-------------|------------|-------------------------------------|-------|----------------------------|
| ECFP_6      | 1526392165 | <br><chem>[*]NC(=O)N([*])[*]</chem> | 0.742 | 5 out of 6                 |

| ECFP_6                                 | -867415197 | 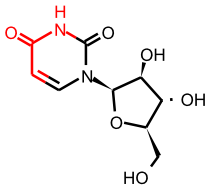<br><chem>[*]NC(=O)C=[*]</chem>                          | 0.581  | 3 out of 4                 |
|----------------------------------------|------------|---------------------------------------------------------------------------------------------------------------------------------------------|--------|----------------------------|
| ECFP_6                                 | 1745066357 | <br><chem>[*]\C=C/C(=[*])[*]</chem>                      | 0.529  | 7 out of 12                |
| Top Features for negative contribution |            |                                                                                                                                             |        |                            |
| Fingerprint                            | Bit/Smiles | Feature Structure                                                                                                                           | Score  | Carcinogen in training set |
| ECFP_6                                 | 305695353  | <br><chem>[*][C@@H]1[*][*][C@H]([*])C@H]1O</chem>        | -0.638 | 1 out of 9                 |
| ECFP_6                                 | 1811812564 | <br><chem>[*]C[C@H]1O[C@@H]([*])C@H]1O</chem>           | -0.482 | 0 out of 2                 |
| ECFP_6                                 | -763075316 | <br><chem>[*][C@@H]1O[C@H](CO)[C@@H]([*])C@H]1O</chem> | -0.482 | 0 out of 2                 |

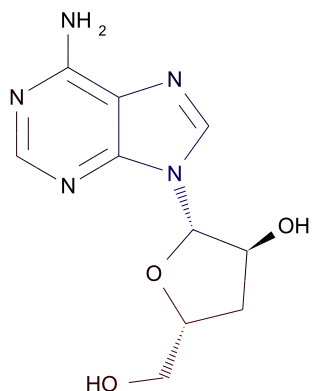
 $C_{10}H_{13}N_5O_3$ 

Molecular Weight: 251.24191

ALogP: -1.308

Rotatable Bonds: 2

Acceptors: 7

Donors: 3

## Model Prediction

**Prediction: Carcinogen**

Probability: 0.252

Enrichment: 0.787

Bayesian Score: -0.575

Mahalanobis Distance: 10.233

Mahalanobis Distance p-value: 0.342

Prediction: Positive if the Bayesian score is above the estimated best cutoff value from minimizing the false positive and false negative rate.

Probability: The estimated probability that the sample is in the positive category. This assumes that the Bayesian score follows a normal distribution and is different from the prediction using a cutoff.

Enrichment: An estimate of enrichment, that is, the increased likelihood (versus random) of this sample being in the category.

Bayesian Score: The standard Laplacian-modified Bayesian score.

Mahalanobis Distance: The Mahalanobis distance (MD) is the distance to the center of the training data. The larger the MD, the less trustworthy the prediction.

Mahalanobis Distance p-value: The p-value gives the fraction of training data with an MD greater than or equal to the one for the given sample, assuming normally distributed data. The smaller the p-value, the less trustworthy the prediction. For highly non-normal X properties (e.g., fingerprints), the MD p-value is wildly inaccurate.

## Structural Similar Compounds

| Name               | Acyclovir                                                           | Zidovudine                                                          | Didanosine                                                          |
|--------------------|---------------------------------------------------------------------|---------------------------------------------------------------------|---------------------------------------------------------------------|
| Structure          |                                                                     |                                                                     |                                                                     |
| Actual Endpoint    | Non-Carcinogen                                                      | Carcinogen                                                          | Non-Carcinogen                                                      |
| Predicted Endpoint | Carcinogen                                                          | Carcinogen                                                          | Non-Carcinogen                                                      |
| Distance           | 0.597                                                               | 0.604                                                               | 0.654                                                               |
| Reference          | US FDA (Centre for Drug Eval.& Res./Off. Testing & Res.) Sept. 1997 | US FDA (Centre for Drug Eval.& Res./Off. Testing & Res.) Sept. 1997 | US FDA (Centre for Drug Eval.& Res./Off. Testing & Res.) Sept. 1997 |

## Model Applicability

Unknown features are fingerprint features in the query molecule, but not found in the training set.

1. All properties and OPS components are within expected ranges.

## Feature Contribution

### Top features for positive contribution

| Fingerprint | Bit/Smiles | Feature Structure      | Score | Carcinogen in training set |
|-------------|------------|------------------------|-------|----------------------------|
| ECFP_6      | 376664744  | <br>OC[C@H]1C[*]1[*]O1 | 0.442 | 2 out of 3                 |

| ECFP_6                                 | -1448786963 | 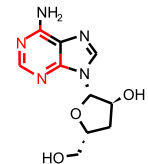<br><chem>[*][c]1:[*]:[c](:[*])<br/>:n:[cH]:n:1</chem>        | 0.424  | 1 out of 1                 |
|----------------------------------------|-------------|--------------------------------------------------------------------------------------------------------------------------------------------------|--------|----------------------------|
| ECFP_6                                 | -554480104  | <br><chem>[*]C[C@H]1C[*][*]O1</chem>                          | 0.364  | 4 out of 8                 |
| Top Features for negative contribution |             |                                                                                                                                                  |        |                            |
| Fingerprint                            | Bit/Smiles  | Feature Structure                                                                                                                                | Score  | Carcinogen in training set |
| ECFP_6                                 | 672362763   | <br><chem>[*]n(:[*]):[*]</chem>                               | -0.410 | 5 out of 26                |
| ECFP_6                                 | -708878603  | <br><chem>[*]n1:[*]:[*]:n:[cH]:<br/>1</chem>                 | -0.384 | 2 out of 11                |
| ECFP_6                                 | 1048320787  | <br><chem>[*][c](:[*]):[c]1:n:[*]<br/>:[*]:[c]:1:[*]</chem> | -0.356 | 1 out of 6                 |

# Ribavirin

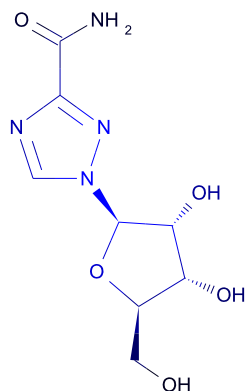

$C_8H_{12}N_4O_5$

Molecular Weight: 244.20467

ALogP: -2.745

Rotatable Bonds: 3

Acceptors: 7

Donors: 4

## Model Prediction

Prediction: Non-Carcinogen

Probability: 0.212

Enrichment: 0.662

Bayesian Score: -8.673

Mahalanobis Distance: 9.227

Mahalanobis Distance p-value: 0.784

Prediction: Positive if the Bayesian score is above the estimated best cutoff value from minimizing the false positive and false negative rate.

Probability: The estimated probability that the sample is in the positive category. This assumes that the Bayesian score follows a normal distribution and is different from the prediction using a cutoff.

Enrichment: An estimate of enrichment, that is, the increased likelihood (versus random) of this sample being in the category.

Bayesian Score: The standard Laplacian-modified Bayesian score.

Mahalanobis Distance: The Mahalanobis distance (MD) is the distance to the center of the training data. The larger the MD, the less trustworthy the prediction.

Mahalanobis Distance p-value: The p-value gives the fraction of training data with an MD greater than or equal to the one for the given sample, assuming normally distributed data. The smaller the p-value, the less trustworthy the prediction. For highly non-normal X properties (e.g., fingerprints), the MD p-value is wildly inaccurate.

# TOPKAT\_Mouse\_Female\_FDA\_None\_vs\_Carcinogen

## Structural Similar Compounds

| Name               | Ribavirin                                                           | Ganciclovir                                                         | Ascorbic acid                                                       |
|--------------------|---------------------------------------------------------------------|---------------------------------------------------------------------|---------------------------------------------------------------------|
| Structure          |                                                                     |                                                                     |                                                                     |
| Actual Endpoint    | Non-Carcinogen                                                      | Carcinogen                                                          | Non-Carcinogen                                                      |
| Predicted Endpoint | Non-Carcinogen                                                      | Carcinogen                                                          | Non-Carcinogen                                                      |
| Distance           | 0.000                                                               | 0.621                                                               | 0.639                                                               |
| Reference          | US FDA (Centre for Drug Eval.& Res./Off. Testing & Res.) Sept. 1997 | US FDA (Centre for Drug Eval.& Res./Off. Testing & Res.) Sept. 1997 | US FDA (Centre for Drug Eval.& Res./Off. Testing & Res.) Sept. 1997 |

## Model Applicability

Unknown features are fingerprint features in the query molecule, but not found in the training set.

1. All properties and OPS components are within expected ranges.

## Feature Contribution

### Top features for positive contribution

| Fingerprint | Bit/Smiles | Feature Structure | Score | Carcinogen in training set |
|-------------|------------|-------------------|-------|----------------------------|
| ECFP_6      | -85480422  | <br>[*]C([*])CO   | 0.337 | 3 out of 6                 |



| ECFP_6                                 | 852414842  | 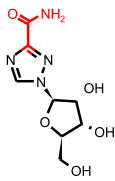<br><chem>[*]:[c](:[*])C(=O)N</chem>                      | 0.234  | 3 out of 7                 |
|----------------------------------------|------------|----------------------------------------------------------------------------------------------------------------------------------------------|--------|----------------------------|
| ECFP_6                                 | 683445015  | <br><chem>[*]O[*]</chem>                                  | 0.181  | 18 out of 48               |
| Top Features for negative contribution |            |                                                                                                                                              |        |                            |
| Fingerprint                            | Bit/Smiles | Feature Structure                                                                                                                            | Score  | Carcinogen in training set |
| ECFP_6                                 | 835630791  | <br><chem>[*]n1:[*]:[*]:[c]([*])n:1</chem>                | -0.657 | 0 out of 3                 |
| ECFP_6                                 | 305695353  | <br><chem>[*][C@@H]1[*][*][C@H]([*])O[C@H]1O</chem>      | -0.638 | 1 out of 9                 |
| ECFP_6                                 | -763075316 | <br><chem>[*][C@@H]1O[C@H](CO)[C@@H](O)[C@H]1[*]</chem> | -0.482 | 0 out of 2                 |

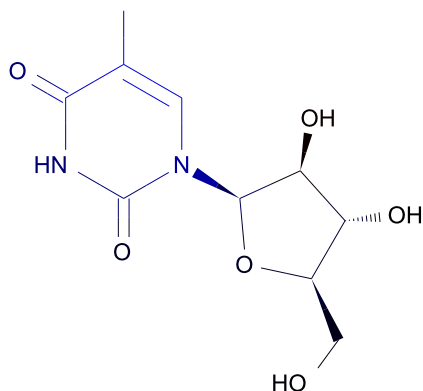
 $C_{10}H_{14}N_2O_6$ 

Molecular Weight: 258.22795

ALogP: -2.005

Rotatable Bonds: 2

Acceptors: 6

Donors: 4

## Model Prediction

Prediction: Single-Carcinogen

Probability: 0.258

Enrichment: 0.630

Bayesian Score: -5.223

Mahalanobis Distance: 11.059

Mahalanobis Distance p-value: 0.00245

Prediction: Positive if the Bayesian score is above the estimated best cutoff value from minimizing the false positive and false negative rate.

Probability: The estimated probability that the sample is in the positive category. This assumes that the Bayesian score follows a normal distribution and is different from the prediction using a cutoff.

Enrichment: An estimate of enrichment, that is, the increased likelihood (versus random) of this sample being in the category.

Bayesian Score: The standard Laplacian-modified Bayesian score.

Mahalanobis Distance: The Mahalanobis distance (MD) is the distance to the center of the training data. The larger the MD, the less trustworthy the prediction.

Mahalanobis Distance p-value: The p-value gives the fraction of training data with an MD greater than or equal to the one for the given sample, assuming normally distributed data. The smaller the p-value, the less trustworthy the prediction. For highly non-normal X properties (e.g., fingerprints), the MD p-value is wildly inaccurate.

## Structural Similar Compounds

| Name               | Zidovudine                                                          | Ganciclovir                                                         | Zalcitabine                                                         |
|--------------------|---------------------------------------------------------------------|---------------------------------------------------------------------|---------------------------------------------------------------------|
| Structure          |                                                                     |                                                                     |                                                                     |
| Actual Endpoint    | Single-Carcinogen                                                   | Multiple-Carcinogen                                                 | Single-Carcinogen                                                   |
| Predicted Endpoint | Single-Carcinogen                                                   | Multiple-Carcinogen                                                 | Single-Carcinogen                                                   |
| Distance           | 0.502                                                               | 0.634                                                               | 0.787                                                               |
| Reference          | US FDA (Centre for Drug Eval.& Res./Off. Testing & Res.) Sept. 1997 | US FDA (Centre for Drug Eval.& Res./Off. Testing & Res.) Sept. 1997 | US FDA (Centre for Drug Eval.& Res./Off. Testing & Res.) Sept. 1997 |

## Model Applicability

Unknown features are fingerprint features in the query molecule, but not found in the training set.

1. ALogP out of range. Value: -2.005. Training min, max, mean, SD: -1.934, 10.955, 2.4263, 2.278.
2. Unknown ECFP\_2 feature: -627157165: [\*][C@H]1[\*][\*]O[C@H]1N(\*)[\*]

## Feature Contribution

### Top features for positive contribution

| Fingerprint | Bit/Smiles | Feature Structure | Score | Multiple-Carcinogen in training set |
|-------------|------------|-------------------|-------|-------------------------------------|
| ECFP_4      | 2024749573 | <br>[*]C(*)O      | 0.494 | 8 out of 11                         |

| ECFP_4                                 | 2022454958 | 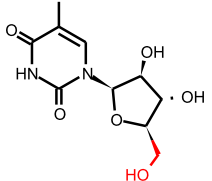<br>[*]CO                        | 0.249  | 5 out of 9                          |
|----------------------------------------|------------|---------------------------------------------------------------------------------------------------------------------|--------|-------------------------------------|
| ECFP_4                                 | -154530762 | <br>[*]N[*]                      | 0.175  | 7 out of 14                         |
| Top Features for negative contribution |            |                                                                                                                     |        |                                     |
| Fingerprint                            | Bit/Smiles | Feature Structure                                                                                                   | Score  | Multiple-Carcinogen in training set |
| ECFP_4                                 | -3067141   | <br>[*]C=C(C)C(=[*])[*]<br>1     | -0.968 | 0 out of 4                          |
| ECFP_4                                 | -812320335 | <br>[*]=C1[*]C=C(C)C(=O)N<br>1 | -0.800 | 0 out of 3                          |
| ECFP_4                                 | 596401564  | <br>[*]N1[*]NC(=O)C(=C1)C      | -0.597 | 0 out of 2                          |



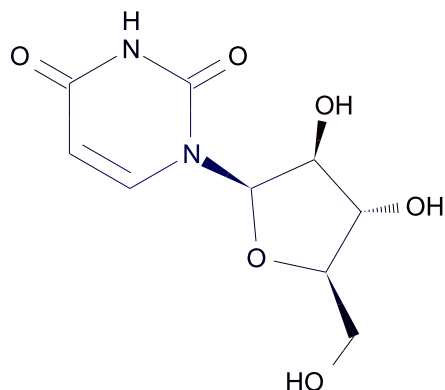

$C_9H_{12}N_2O_6$

Molecular Weight: 244.20137

ALogP: -2.451

Rotatable Bonds: 2

Acceptors: 6

Donors: 4

## Model Prediction

Prediction: Single-Carcinogen

Probability: 0.332

Enrichment: 0.810

Bayesian Score: -1.983

Mahalanobis Distance: 11.480

Mahalanobis Distance p-value: 0.0011

Prediction: Positive if the Bayesian score is above the estimated best cutoff value from minimizing the false positive and false negative rate.

Probability: The estimated probability that the sample is in the positive category. This assumes that the Bayesian score follows a normal distribution and is different from the prediction using a cutoff.

Enrichment: An estimate of enrichment, that is, the increased likelihood (versus random) of this sample being in the category.

Bayesian Score: The standard Laplacian-modified Bayesian score.

Mahalanobis Distance: The Mahalanobis distance (MD) is the distance to the center of the training data. The larger the MD, the less trustworthy the prediction.

Mahalanobis Distance p-value: The p-value gives the fraction of training data with an MD greater than or equal to the one for the given sample, assuming normally distributed data. The smaller the p-value, the less trustworthy the prediction. For highly non-normal X properties (e.g., fingerprints), the MD p-value is wildly inaccurate.

## Structural Similar Compounds

| Name               | Ganciclovir                                                         | Zidovudine                                                          | Zalcitabine                                                         |
|--------------------|---------------------------------------------------------------------|---------------------------------------------------------------------|---------------------------------------------------------------------|
| Structure          |                                                                     |                                                                     |                                                                     |
| Actual Endpoint    | Multiple-Carcinogen                                                 | Single-Carcinogen                                                   | Single-Carcinogen                                                   |
| Predicted Endpoint | Multiple-Carcinogen                                                 | Single-Carcinogen                                                   | Single-Carcinogen                                                   |
| Distance           | 0.640                                                               | 0.641                                                               | 0.776                                                               |
| Reference          | US FDA (Centre for Drug Eval.& Res./Off. Testing & Res.) Sept. 1997 | US FDA (Centre for Drug Eval.& Res./Off. Testing & Res.) Sept. 1997 | US FDA (Centre for Drug Eval.& Res./Off. Testing & Res.) Sept. 1997 |

## Model Applicability

Unknown features are fingerprint features in the query molecule, but not found in the training set.

1. ALogP out of range. Value: -2.451. Training min, max, mean, SD: -1.934, 10.955, 2.4263, 2.278.
2. Unknown ECFP\_2 feature: -627157165: [\*][C@H]1[\*][\*]O[C@H]1N(\*)[\*]

## Feature Contribution

### Top features for positive contribution

| Fingerprint | Bit/Smiles | Feature Structure | Score | Multiple-Carcinogen in training set |
|-------------|------------|-------------------|-------|-------------------------------------|
| ECFP_4      | 2024749573 | <br>[*]C([*])O    | 0.494 | 8 out of 11                         |

| ECFP_4                                 | 1745066357  | 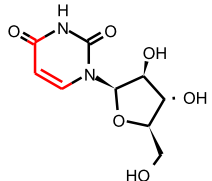<br><chem>[*]C=C/C(=[*])[*]</chem>                | 0.259  | 4 out of 7                          |
|----------------------------------------|-------------|--------------------------------------------------------------------------------------------------------------------------------------|--------|-------------------------------------|
| ECFP_4                                 | 2022454958  | <br><chem>[*]CO</chem>                            | 0.249  | 5 out of 9                          |
| Top Features for negative contribution |             |                                                                                                                                      |        |                                     |
| Fingerprint                            | Bit/Smiles  | Feature Structure                                                                                                                    | Score  | Multiple-Carcinogen in training set |
| ECFP_4                                 | -1811420270 | <br><chem>[*]C([*])N(C=[*])C(=[*])</chem>         | -0.597 | 0 out of 2                          |
| ECFP_4                                 | 305695353   | <br><chem>[*][C@@H]1[*][*][C@@H]([*])C1O</chem> | -0.342 | 0 out of 1                          |
| ECFP_4                                 | -553149446  | <br><chem>[*]C[C@@H]1O[*][*][C@@H]1[*]</chem>   | -0.342 | 0 out of 1                          |



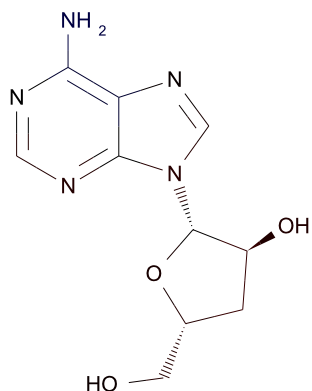
 $C_{10}H_{13}N_5O_3$ 

Molecular Weight: 251.24191

ALogP: -1.308

Rotatable Bonds: 2

Acceptors: 7

Donors: 3

## Model Prediction

**Prediction: Multiple-Carcinogen**

Probability: 0.456

Enrichment: 1.112

Bayesian Score: 1.266

Mahalanobis Distance: 9.452

Mahalanobis Distance p-value: 0.04

Prediction: Positive if the Bayesian score is above the estimated best cutoff value from minimizing the false positive and false negative rate.

Probability: The estimated probability that the sample is in the positive category. This assumes that the Bayesian score follows a normal distribution and is different from the prediction using a cutoff.

Enrichment: An estimate of enrichment, that is, the increased likelihood (versus random) of this sample being in the category.

Bayesian Score: The standard Laplacian-modified Bayesian score.

Mahalanobis Distance: The Mahalanobis distance (MD) is the distance to the center of the training data. The larger the MD, the less trustworthy the prediction.

Mahalanobis Distance p-value: The p-value gives the fraction of training data with an MD greater than or equal to the one for the given sample, assuming normally distributed data. The smaller the p-value, the less trustworthy the prediction. For highly non-normal X properties (e.g., fingerprints), the MD p-value is wildly inaccurate.

## Structural Similar Compounds

| Name               | Zidovudine                                                          | Triamterene                                                         | Zalcitabine                                                         |
|--------------------|---------------------------------------------------------------------|---------------------------------------------------------------------|---------------------------------------------------------------------|
| Structure          |                                                                     |                                                                     |                                                                     |
| Actual Endpoint    | Single-Carcinogen                                                   | Single-Carcinogen                                                   | Single-Carcinogen                                                   |
| Predicted Endpoint | Single-Carcinogen                                                   | Single-Carcinogen                                                   | Single-Carcinogen                                                   |
| Distance           | 0.590                                                               | 0.663                                                               | 0.664                                                               |
| Reference          | US FDA (Centre for Drug Eval.& Res./Off. Testing & Res.) Sept. 1997 | US FDA (Centre for Drug Eval.& Res./Off. Testing & Res.) Sept. 1997 | US FDA (Centre for Drug Eval.& Res./Off. Testing & Res.) Sept. 1997 |

## Model Applicability

Unknown features are fingerprint features in the query molecule, but not found in the training set.

1. All properties and OPS components are within expected ranges.
2. Unknown ECFP\_2 feature: 1049075205: [\*]n1:[\*]:[\*]:[c](:[\*]):[c]:1:n:[\*]
3. Unknown ECFP\_2 feature: -1219098860: [\*]C([\*])n1:[c](:[\*]):[\*]:[\*]:c:1
4. Unknown ECFP\_2 feature: 125442029: [\*][C@H]1[\*][\*]O[C@H]1n(-[\*]):[\*]

## Feature Contribution

### Top features for positive contribution

| Fingerprint | Bit/Smiles | Feature Structure              | Score | Multiple-Carcinogen in training set |
|-------------|------------|--------------------------------|-------|-------------------------------------|
| ECFP_4      | -708878603 | <br>[*]n1:[*]:[*]:n:[cH]:<br>1 | 0.501 | 2 out of 2                          |



|                                        |             |                                                                                                                                             |        |                                     |
|----------------------------------------|-------------|---------------------------------------------------------------------------------------------------------------------------------------------|--------|-------------------------------------|
| ECFP_4                                 | 2024749573  | 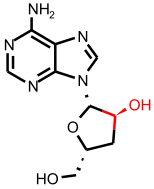<br><chem>[*]C([*])O</chem>                              | 0.494  | 8 out of 11                         |
| ECFP_4                                 | -801490360  | <br><chem>[*][C@@H]1[*][*][C@@H]1([*])C1</chem>          | 0.422  | 8 out of 12                         |
| Top Features for negative contribution |             |                                                                                                                                             |        |                                     |
| Fingerprint                            | Bit/Smiles  | Feature Structure                                                                                                                           | Score  | Multiple-Carcinogen in training set |
| ECFP_4                                 | -1734834311 | <br><chem>[*]:n:[c](N):[c](:[*])</chem>                  | -0.597 | 0 out of 2                          |
| ECFP_4                                 | -938530932  | <br><chem>[*]:[c](:[*])N</chem>                        | -0.352 | 2 out of 8                          |
| ECFP_4                                 | 1048320787  | <br><chem>[*][c](:[*]):[c]1:n:[*]:[*]:[c]:1:[*]</chem> | -0.342 | 0 out of 1                          |



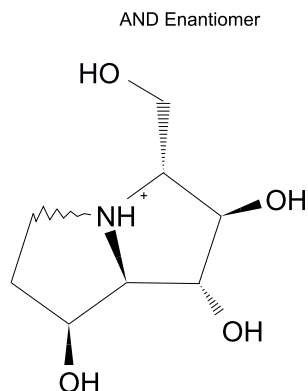

$C_8H_{16}NO_4$   
 Molecular Weight: 190.21693  
 ALogP: -3.556  
 Rotatable Bonds: 1  
 Acceptors: 4  
 Donors: 5

## Model Prediction

Prediction: Carcinogen

Probability: 0.285

Enrichment: 0.969

Bayesian Score: -0.781

Mahalanobis Distance: 7.806

Mahalanobis Distance p-value: 0.993

Prediction: Positive if the Bayesian score is above the estimated best cutoff value from minimizing the false positive and false negative rate.

Probability: The estimated probability that the sample is in the positive category. This assumes that the Bayesian score follows a normal distribution and is different from the prediction using a cutoff.

Enrichment: An estimate of enrichment, that is, the increased likelihood (versus random) of this sample being in the category.

Bayesian Score: The standard Laplacian-modified Bayesian score.

Mahalanobis Distance: The Mahalanobis distance (MD) is the distance to the center of the training data. The larger the MD, the less trustworthy the prediction.

Mahalanobis Distance p-value: The p-value gives the fraction of training data with an MD greater than or equal to the one for the given sample, assuming normally distributed data. The smaller the p-value, the less trustworthy the prediction. For highly non-normal X properties (e.g., fingerprints), the MD p-value is wildly inaccurate.

## Structural Similar Compounds

| Name               | Methyldopa                                                          | Mannitol                                                            | Ascorbic acid                                                       |
|--------------------|---------------------------------------------------------------------|---------------------------------------------------------------------|---------------------------------------------------------------------|
| Structure          |                                                                     |                                                                     |                                                                     |
| Actual Endpoint    | Non-Carcinogen                                                      | Non-Carcinogen                                                      | Non-Carcinogen                                                      |
| Predicted Endpoint | Non-Carcinogen                                                      | Non-Carcinogen                                                      | Non-Carcinogen                                                      |
| Distance           | 0.738                                                               | 0.810                                                               | 0.813                                                               |
| Reference          | US FDA (Centre for Drug Eval.& Res./Off. Testing & Res.) Sept. 1997 | US FDA (Centre for Drug Eval.& Res./Off. Testing & Res.) Sept. 1997 | US FDA (Centre for Drug Eval.& Res./Off. Testing & Res.) Sept. 1997 |

## Model Applicability

Unknown features are fingerprint features in the query molecule, but not found in the training set.

1. All properties and OPS components are within expected ranges.
2. Unknown FCFP\_2 feature: 10: [\*][NH+]([\*])[\*]
3. Unknown FCFP\_2 feature: -1853714334: [\*][C@H]1[\*][\*][C@H]2[\*][\*]C[NH+]12
4. Unknown FCFP\_2 feature: -1817836174: [\*][C@H]1[\*][\*][NH+]2[\*][\*][C@H](1)[\*]C12
5. Unknown FCFP\_2 feature: 1155241219: [\*][NH+]1[\*][\*]CC1

## Feature Contribution

### Top features for positive contribution

| Fingerprint | Bit/Smiles | Feature Structure             | Score | Carcinogen in training set |
|-------------|------------|-------------------------------|-------|----------------------------|
| FCFP_6      | 0          | <br><chem>[*]C([*])[*]</chem> | 0.114 | 90 out of 305              |

| FCFP_6                                 | 3           | 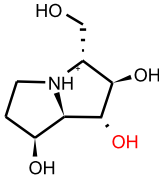<br><chem>[*]O</chem>                               | 0.105  | 62 out of 212              |
|----------------------------------------|-------------|----------------------------------------------------------------------------------------------------------------------------------------|--------|----------------------------|
| FCFP_6                                 | -1272798659 | <br><chem>[*][C@@H]1[*][*]CC1</chem>                | 0.063  | 39 out of 139              |
| Top Features for negative contribution |             |                                                                                                                                        |        |                            |
| Fingerprint                            | Bit/Smiles  | Feature Structure                                                                                                                      | Score  | Carcinogen in training set |
| FCFP_6                                 | -1272709286 | <br><chem>[*]C([*])CO</chem>                        | -0.185 | 16 out of 74               |
| FCFP_6                                 | -1043250487 | <br><chem>[*][C@@H]1[*][*][C@H]([*])[C@H]1O</chem> | -0.073 | 19 out of 78               |
| FCFP_6                                 | 1070061035  | <br><chem>[*]C([*])O</chem>                       | 0.000  | 33 out of 129              |

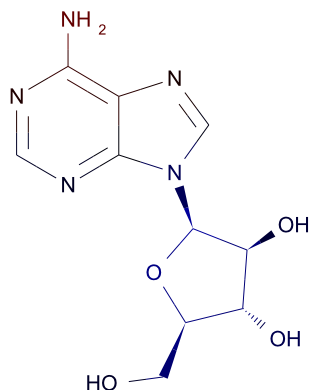

C<sub>10</sub>H<sub>13</sub>N<sub>5</sub>O<sub>4</sub>

Molecular Weight: 267.24132

ALogP: -1.881

Rotatable Bonds: 2

Acceptors: 8

Donors: 4

## Model Prediction

Prediction: Non-Carcinogen

Probability: 0.228

Enrichment: 0.775

Bayesian Score: -3.366

Mahalanobis Distance: 11.464

Mahalanobis Distance p-value: 0.0268

Prediction: Positive if the Bayesian score is above the estimated best cutoff value from minimizing the false positive and false negative rate.

Probability: The estimated probability that the sample is in the positive category. This assumes that the Bayesian score follows a normal distribution and is different from the prediction using a cutoff.

Enrichment: An estimate of enrichment, that is, the increased likelihood (versus random) of this sample being in the category.

Bayesian Score: The standard Laplacian-modified Bayesian score.

Mahalanobis Distance: The Mahalanobis distance (MD) is the distance to the center of the training data. The larger the MD, the less trustworthy the prediction.

Mahalanobis Distance p-value: The p-value gives the fraction of training data with an MD greater than or equal to the one for the given sample, assuming normally distributed data. The smaller the p-value, the less trustworthy the prediction. For highly non-normal X properties (e.g., fingerprints), the MD p-value is wildly inaccurate.

## Structural Similar Compounds

| Name               | Ribavirin                                                           | Ganciclovir                                                         | Acyclovir                                                           |
|--------------------|---------------------------------------------------------------------|---------------------------------------------------------------------|---------------------------------------------------------------------|
| Structure          |                                                                     |                                                                     |                                                                     |
| Actual Endpoint    | Non-Carcinogen                                                      | Carcinogen                                                          | Non-Carcinogen                                                      |
| Predicted Endpoint | Non-Carcinogen                                                      | Carcinogen                                                          | Carcinogen                                                          |
| Distance           | 0.516                                                               | 0.614                                                               | 0.695                                                               |
| Reference          | US FDA (Centre for Drug Eval.& Res./Off. Testing & Res.) Sept. 1997 | US FDA (Centre for Drug Eval.& Res./Off. Testing & Res.) Sept. 1997 | US FDA (Centre for Drug Eval.& Res./Off. Testing & Res.) Sept. 1997 |

## Model Applicability

Unknown features are fingerprint features in the query molecule, but not found in the training set.

1. All properties and OPS components are within expected ranges.

## Feature Contribution

### Top features for positive contribution

| Fingerprint | Bit/Smiles | Feature Structure                            | Score | Carcinogen in training set |
|-------------|------------|----------------------------------------------|-------|----------------------------|
| FCFP_6      | -576794779 | <br>[*]n1:[cH]:n:[c]2:[c](N):n:[*]:n:[c]:1:2 | 0.676 | 2 out of 2                 |

| FCFP_6                                 | -450797925  | 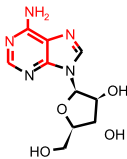<br><chem>N[c]1:n:[cH]:[*]:[c]2</chem><br><chem>:[*]:[*]:n:[c]:1:2</chem> | 0.676  | 2 out of 2                 |
|----------------------------------------|-------------|--------------------------------------------------------------------------------------------------------------------------------------------------------------|--------|----------------------------|
| FCFP_6                                 | -1151884458 | <br><chem>[*]:n:[c](N):[c](:[*]</chem><br><chem>):[*]</chem>              | 0.348  | 6 out of 15                |
| Top Features for negative contribution |             |                                                                                                                                                              |        |                            |
| Fingerprint                            | Bit/Smiles  | Feature Structure                                                                                                                                            | Score  | Carcinogen in training set |
| FCFP_6                                 | -124685461  | <br><chem>[*]:n:[cH]:n:[*]</chem>                                         | -0.731 | 1 out of 12                |
| FCFP_6                                 | 422052003   | <br><chem>[*]C[C@H]1O[C@@H]([*])</chem><br><chem>]C@@H(O)[C@@H]1O</chem> | -0.582 | 0 out of 3                 |
| FCFP_6                                 | 1315416442  | <br><chem>[*]C[C@H]1[*]O[C@H]</chem><br><chem>1n([*]):[*]</chem>        | -0.423 | 0 out of 2                 |

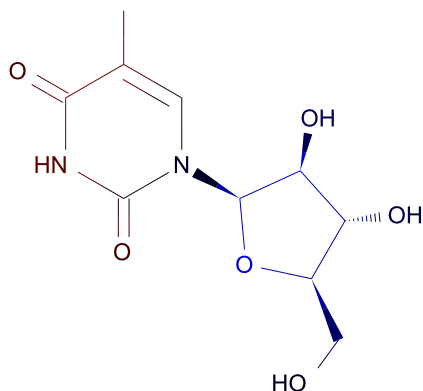

$C_{10}H_{14}N_2O_6$

Molecular Weight: 258.22795

ALogP: -2.005

Rotatable Bonds: 2

Acceptors: 6

Donors: 4

## Model Prediction

**Prediction: Carcinogen**

Probability: 0.267

Enrichment: 0.907

Bayesian Score: -1.535

Mahalanobis Distance: 9.169

Mahalanobis Distance p-value: 0.75

Prediction: Positive if the Bayesian score is above the estimated best cutoff value from minimizing the false positive and false negative rate.

Probability: The estimated probability that the sample is in the positive category. This assumes that the Bayesian score follows a normal distribution and is different from the prediction using a cutoff.

Enrichment: An estimate of enrichment, that is, the increased likelihood (versus random) of this sample being in the category.

Bayesian Score: The standard Laplacian-modified Bayesian score.

Mahalanobis Distance: The Mahalanobis distance (MD) is the distance to the center of the training data. The larger the MD, the less trustworthy the prediction.

Mahalanobis Distance p-value: The p-value gives the fraction of training data with an MD greater than or equal to the one for the given sample, assuming normally distributed data. The smaller the p-value, the less trustworthy the prediction. For highly non-normal X properties (e.g., fingerprints), the MD p-value is wildly inaccurate.

## Structural Similar Compounds

| Name               | Zidovudine                                                          | Methyldopa                                                          | Ribavirin                                                           |
|--------------------|---------------------------------------------------------------------|---------------------------------------------------------------------|---------------------------------------------------------------------|
| Structure          |                                                                     |                                                                     |                                                                     |
| Actual Endpoint    | Non-Carcinogen                                                      | Non-Carcinogen                                                      | Non-Carcinogen                                                      |
| Predicted Endpoint | Non-Carcinogen                                                      | Non-Carcinogen                                                      | Non-Carcinogen                                                      |
| Distance           | 0.489                                                               | 0.589                                                               | 0.615                                                               |
| Reference          | US FDA (Centre for Drug Eval.& Res./Off. Testing & Res.) Sept. 1997 | US FDA (Centre for Drug Eval.& Res./Off. Testing & Res.) Sept. 1997 | US FDA (Centre for Drug Eval.& Res./Off. Testing & Res.) Sept. 1997 |

## Model Applicability

Unknown features are fingerprint features in the query molecule, but not found in the training set.

1. All properties and OPS components are within expected ranges.

## Feature Contribution

### Top features for positive contribution

| Fingerprint | Bit/Smiles | Feature Structure                             | Score | Carcinogen in training set |
|-------------|------------|-----------------------------------------------|-------|----------------------------|
| FCFP_6      | 201733902  | <br><chem>[*]C([*])N1C=([*]C([*])NC1=O</chem> | 0.517 | 2 out of 3                 |

| FCFP_6                                 | 566058135  | 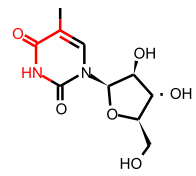<br><chem>[*]NC(=O)C(=[*])[*]</chem>                                                                        | 0.447  | 17 out of 40               |
|----------------------------------------|------------|------------------------------------------------------------------------------------------------------------------------------------------------------------------------------------------------|--------|----------------------------|
| FCFP_6                                 | -548679521 | <br><chem>[*]N1[*]=C([*])C(=O)N</chem><br><chem>C1=O</chem>                                                 | 0.380  | 2 out of 4                 |
| Top Features for negative contribution |            |                                                                                                                                                                                                |        |                            |
| Fingerprint                            | Bit/Smiles | Feature Structure                                                                                                                                                                              | Score  | Carcinogen in training set |
| FCFP_6                                 | 699500266  | <br><chem>[*][C@H]1[*][*][O][C@H]</chem><br><chem>1N([*])[*]</chem>                                         | -0.850 | 1 out of 14                |
| FCFP_6                                 | 422052003  | <br><chem>[*][C[C@H]1O[C@H]([*])</chem><br><chem>][C@H]([*])O[C@H]1O</chem>                                | -0.582 | 0 out of 3                 |
| FCFP_6                                 | -332692398 | <br><chem>[*][C[C@H]1O[C@H]([C@H]</chem><br><chem>)(O)[C@H]1[*])N(C=[</chem><br><chem>*)C(=[*])[*]</chem> | -0.582 | 0 out of 3                 |



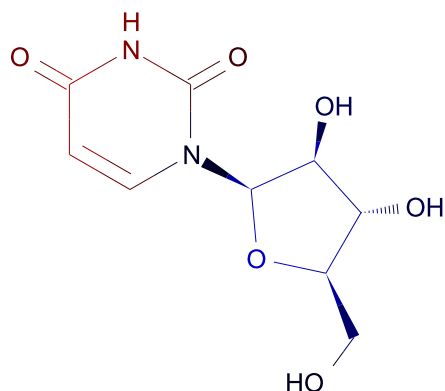

$C_9H_{12}N_2O_6$

Molecular Weight: 244.20137

ALogP: -2.451

Rotatable Bonds: 2

Acceptors: 6

Donors: 4

## Model Prediction

**Prediction: Carcinogen**

Probability: 0.290

Enrichment: 0.986

Bayesian Score: -0.584

Mahalanobis Distance: 8.318

Mahalanobis Distance p-value: 0.961

Prediction: Positive if the Bayesian score is above the estimated best cutoff value from minimizing the false positive and false negative rate.

Probability: The estimated probability that the sample is in the positive category. This assumes that the Bayesian score follows a normal distribution and is different from the prediction using a cutoff.

Enrichment: An estimate of enrichment, that is, the increased likelihood (versus random) of this sample being in the category.

Bayesian Score: The standard Laplacian-modified Bayesian score.

Mahalanobis Distance: The Mahalanobis distance (MD) is the distance to the center of the training data. The larger the MD, the less trustworthy the prediction.

Mahalanobis Distance p-value: The p-value gives the fraction of training data with an MD greater than or equal to the one for the given sample, assuming normally distributed data. The smaller the p-value, the less trustworthy the prediction. For highly non-normal X properties (e.g., fingerprints), the MD p-value is wildly inaccurate.

## Structural Similar Compounds

| Name               | Ribavirin                                                           | Methyldopa                                                          | Ascorbic acid                                                       |
|--------------------|---------------------------------------------------------------------|---------------------------------------------------------------------|---------------------------------------------------------------------|
| Structure          |                                                                     |                                                                     |                                                                     |
| Actual Endpoint    | Non-Carcinogen                                                      | Non-Carcinogen                                                      | Non-Carcinogen                                                      |
| Predicted Endpoint | Non-Carcinogen                                                      | Non-Carcinogen                                                      | Non-Carcinogen                                                      |
| Distance           | 0.555                                                               | 0.620                                                               | 0.621                                                               |
| Reference          | US FDA (Centre for Drug Eval.& Res./Off. Testing & Res.) Sept. 1997 | US FDA (Centre for Drug Eval.& Res./Off. Testing & Res.) Sept. 1997 | US FDA (Centre for Drug Eval.& Res./Off. Testing & Res.) Sept. 1997 |

## Model Applicability

Unknown features are fingerprint features in the query molecule, but not found in the training set.

1. All properties and OPS components are within expected ranges.

## Feature Contribution

### Top features for positive contribution

| Fingerprint | Bit/Smiles | Feature Structure                    | Score | Carcinogen in training set |
|-------------|------------|--------------------------------------|-------|----------------------------|
| FCFP_6      | 1561767715 | <br><chem>[*]=C1[*]C=CC(=O)N1</chem> | 0.891 | 4 out of 4                 |

| FCFP_6                                 | 201733902  | 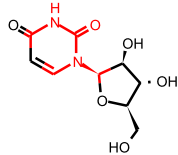<br><chem>[*]C([*])N1C=[*]C(=[*])NC1=O</chem>            | 0.517  | 2 out of 3                 |
|----------------------------------------|------------|---------------------------------------------------------------------------------------------------------------------------------------------|--------|----------------------------|
| FCFP_6                                 | 451847724  | <br><chem>[*]C=C/C(=[*])[*]</chem>                       | 0.479  | 21 out of 48               |
| Top Features for negative contribution |            |                                                                                                                                             |        |                            |
| Fingerprint                            | Bit/Smiles | Feature Structure                                                                                                                           | Score  | Carcinogen in training set |
| FCFP_6                                 | 699500266  | <br><chem>[*]C@H]1[*]C@H]([*])O[C@H]1N([*])C=O</chem>    | -0.850 | 1 out of 14                |
| FCFP_6                                 | 422052003  | <br><chem>[*]C[C@H]1O[C@H]([*])C@H]([*])O[C@H]1O</chem> | -0.582 | 0 out of 3                 |
| FCFP_6                                 | -332692398 | <br><chem>[*]C@H]1O[C@H]([*])C@H]([*])O[C@H]1O</chem>  | -0.582 | 0 out of 3                 |

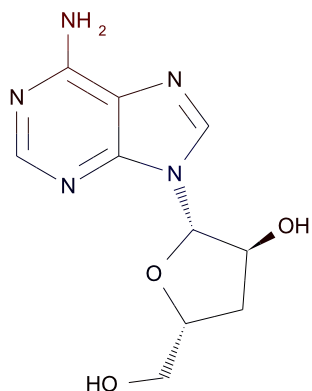
 $C_{10}H_{13}N_5O_3$ 

Molecular Weight: 251.24191

ALogP: -1.308

Rotatable Bonds: 2

Acceptors: 7

Donors: 3

## Model Prediction

**Prediction: Carcinogen**

Probability: 0.287

Enrichment: 0.975

Bayesian Score: -0.722

Mahalanobis Distance: 11.853

Mahalanobis Distance p-value: 0.00991

Prediction: Positive if the Bayesian score is above the estimated best cutoff value from minimizing the false positive and false negative rate.

Probability: The estimated probability that the sample is in the positive category. This assumes that the Bayesian score follows a normal distribution and is different from the prediction using a cutoff.

Enrichment: An estimate of enrichment, that is, the increased likelihood (versus random) of this sample being in the category.

Bayesian Score: The standard Laplacian-modified Bayesian score.

Mahalanobis Distance: The Mahalanobis distance (MD) is the distance to the center of the training data. The larger the MD, the less trustworthy the prediction.

Mahalanobis Distance p-value: The p-value gives the fraction of training data with an MD greater than or equal to the one for the given sample, assuming normally distributed data. The smaller the p-value, the less trustworthy the prediction. For highly non-normal X properties (e.g., fingerprints), the MD p-value is wildly inaccurate.

## Structural Similar Compounds

| Name               | Acyclovir                                                           | Zidovudine                                                          | Didanosine                                                          |
|--------------------|---------------------------------------------------------------------|---------------------------------------------------------------------|---------------------------------------------------------------------|
| Structure          |                                                                     |                                                                     |                                                                     |
| Actual Endpoint    | Non-Carcinogen                                                      | Non-Carcinogen                                                      | Non-Carcinogen                                                      |
| Predicted Endpoint | Carcinogen                                                          | Non-Carcinogen                                                      | Non-Carcinogen                                                      |
| Distance           | 0.581                                                               | 0.607                                                               | 0.639                                                               |
| Reference          | US FDA (Centre for Drug Eval.& Res./Off. Testing & Res.) Sept. 1997 | US FDA (Centre for Drug Eval.& Res./Off. Testing & Res.) Sept. 1997 | US FDA (Centre for Drug Eval.& Res./Off. Testing & Res.) Sept. 1997 |

## Model Applicability

Unknown features are fingerprint features in the query molecule, but not found in the training set.

1. All properties and OPS components are within expected ranges.

## Feature Contribution

### Top features for positive contribution

| Fingerprint | Bit/Smiles | Feature Structure                               | Score | Carcinogen in training set |
|-------------|------------|-------------------------------------------------|-------|----------------------------|
| FCFP_6      | -450797925 | <br>N[c]1:n:[cH]:[*]:[c]2<br>:[*]:[*]:n:[c]:1:2 | 0.676 | 2 out of 2                 |



# Ribavirin

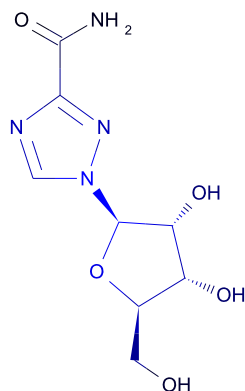

$C_8H_{12}N_4O_5$

Molecular Weight: 244.20467

ALogP: -2.745

Rotatable Bonds: 3

Acceptors: 7

Donors: 4

## Model Prediction

Prediction: Non-Carcinogen

Probability: 0.165

Enrichment: 0.561

Bayesian Score: -7.533

Mahalanobis Distance: 9.864

Mahalanobis Distance p-value: 0.436

Prediction: Positive if the Bayesian score is above the estimated best cutoff value from minimizing the false positive and false negative rate.

Probability: The estimated probability that the sample is in the positive category. This assumes that the Bayesian score follows a normal distribution and is different from the prediction using a cutoff.

Enrichment: An estimate of enrichment, that is, the increased likelihood (versus random) of this sample being in the category.

Bayesian Score: The standard Laplacian-modified Bayesian score.

Mahalanobis Distance: The Mahalanobis distance (MD) is the distance to the center of the training data. The larger the MD, the less trustworthy the prediction.

Mahalanobis Distance p-value: The p-value gives the fraction of training data with an MD greater than or equal to the one for the given sample, assuming normally distributed data. The smaller the p-value, the less trustworthy the prediction. For highly non-normal X properties (e.g., fingerprints), the MD p-value is wildly inaccurate.

# TOPKAT\_Mouse\_Male\_FDA\_None\_vs\_Carcinogen

## Structural Similar Compounds

| Name               | Ribavirin                                                           | Ganciclovir                                                         | Ascorbic acid                                                       |
|--------------------|---------------------------------------------------------------------|---------------------------------------------------------------------|---------------------------------------------------------------------|
| Structure          |                                                                     |                                                                     |                                                                     |
| Actual Endpoint    | Non-Carcinogen                                                      | Carcinogen                                                          | Non-Carcinogen                                                      |
| Predicted Endpoint | Non-Carcinogen                                                      | Carcinogen                                                          | Non-Carcinogen                                                      |
| Distance           | 0.000                                                               | 0.583                                                               | 0.606                                                               |
| Reference          | US FDA (Centre for Drug Eval.& Res./Off. Testing & Res.) Sept. 1997 | US FDA (Centre for Drug Eval.& Res./Off. Testing & Res.) Sept. 1997 | US FDA (Centre for Drug Eval.& Res./Off. Testing & Res.) Sept. 1997 |

## Model Applicability

Unknown features are fingerprint features in the query molecule, but not found in the training set.

1. All properties and OPS components are within expected ranges.

## Feature Contribution

### Top features for positive contribution

| Fingerprint | Bit/Smiles  | Feature Structure                    | Score | Carcinogen in training set |
|-------------|-------------|--------------------------------------|-------|----------------------------|
| FCFP_6      | -2049666792 | <br>[*]C([*])n1:[cH]:[*]:<br>[*]:n:1 | 0.259 | 2 out of 5                 |

| FCFP_6                                 | 1872154524  | 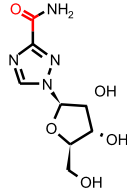<br><chem>[*]C(=O)[*]</chem>                                         | 0.205  | 69 out of 213              |
|----------------------------------------|-------------|---------------------------------------------------------------------------------------------------------------------------------------------------------|--------|----------------------------|
| FCFP_6                                 | -1549103449 | <br><chem>[*]:[c](:[*])C(=O)N</chem>                                 | 0.204  | 7 out of 21                |
| Top Features for negative contribution |             |                                                                                                                                                         |        |                            |
| Fingerprint                            | Bit/Smiles  | Feature Structure                                                                                                                                       | Score  | Carcinogen in training set |
| FCFP_6                                 | -124685461  | <br><chem>[*]:n:[cH]:n:[*]</chem>                                    | -0.731 | 1 out of 12                |
| FCFP_6                                 | 422052003   | <br><chem>[*]C[C@H]1O[C@@H]([C@@H]([C@H](O)[C@@H]1O)C(=O)N)O</chem> | -0.582 | 0 out of 3                 |
| FCFP_6                                 | 659252319   | <br><chem>[*]C([*])n1:[cH]:n:[c]([*]):n:1</chem>                   | -0.582 | 0 out of 3                 |

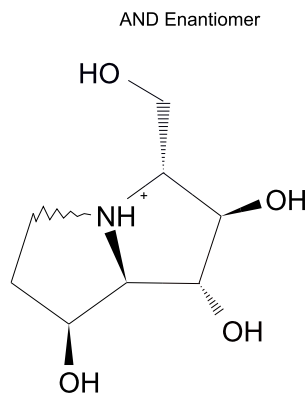

$C_8H_{16}NO_4$   
 Molecular Weight: 190.21693  
 ALogP: -3.556  
 Rotatable Bonds: 1  
 Acceptors: 4  
 Donors: 5

## Model Prediction

Prediction: Multiple-Carcinogen

Probability: 0.261

Enrichment: 0.868

Bayesian Score: 0.047

Mahalanobis Distance: 13.070

Mahalanobis Distance p-value: 8.66e-005

Prediction: Positive if the Bayesian score is above the estimated best cutoff value from minimizing the false positive and false negative rate.

Probability: The estimated probability that the sample is in the positive category. This assumes that the Bayesian score follows a normal distribution and is different from the prediction using a cutoff.

Enrichment: An estimate of enrichment, that is, the increased likelihood (versus random) of this sample being in the category.

Bayesian Score: The standard Laplacian-modified Bayesian score.

Mahalanobis Distance: The Mahalanobis distance (MD) is the distance to the center of the training data. The larger the MD, the less trustworthy the prediction.

Mahalanobis Distance p-value: The p-value gives the fraction of training data with an MD greater than or equal to the one for the given sample, assuming normally distributed data. The smaller the p-value, the less trustworthy the prediction. For highly non-normal X properties (e.g., fingerprints), the MD p-value is wildly inaccurate.

## Structural Similar Compounds

| Name               | Ganciclovir                                                         | Metaproterenol                                                      | Hydrochlorothiazide                                                 |
|--------------------|---------------------------------------------------------------------|---------------------------------------------------------------------|---------------------------------------------------------------------|
| Structure          |                                                                     |                                                                     |                                                                     |
| Actual Endpoint    | Multiple-Carcinogen                                                 | Single-Carcinogen                                                   | Single-Carcinogen                                                   |
| Predicted Endpoint | Multiple-Carcinogen                                                 | Single-Carcinogen                                                   | Single-Carcinogen                                                   |
| Distance           | 0.958                                                               | 0.970                                                               | 1.003                                                               |
| Reference          | US FDA (Centre for Drug Eval.& Res./Off. Testing & Res.) Sept. 1997 | US FDA (Centre for Drug Eval.& Res./Off. Testing & Res.) Sept. 1997 | US FDA (Centre for Drug Eval.& Res./Off. Testing & Res.) Sept. 1997 |

## Model Applicability

Unknown features are fingerprint features in the query molecule, but not found in the training set.

1. ALogP out of range. Value: -3.556. Training min, max, mean, SD: -3.329, 10.955, 2.3788, 2.44.
2. Unknown FCFP\_2 feature: 10: [\*][NH+]([\*])([\*])
3. Unknown FCFP\_2 feature: -1853714334: [\*][C@@H]1[\*][\*][C@H]2[\*][\*]C[NH+]12
4. Unknown FCFP\_2 feature: -1817836174: [\*][C@H]1[\*][\*][NH+]2[\*][\*][C@H]([\*])C12
5. Unknown FCFP\_2 feature: 1155241219: [\*][NH+]1[\*][\*]CC1

## Feature Contribution

### Top features for positive contribution

| Fingerprint | Bit/Smiles | Feature Structure           | Score | Multiple-Carcinogen in training set |
|-------------|------------|-----------------------------|-------|-------------------------------------|
| FCFP_12     | 1070061035 | <br><chem>[*]C([*])O</chem> | 0.135 | 13 out of 33                        |

| FCFP_12                                | -1043250487 | <br><chem>[*][C@@H]1[*][*][C@H]([*])[C@H]1O</chem> | 0.069  | 7 out of 19                         |
|----------------------------------------|-------------|--------------------------------------------------------------------------------------------------------------------------------------|--------|-------------------------------------|
| Top Features for negative contribution |             |                                                                                                                                      |        |                                     |
| Fingerprint                            | Bit/Smiles  | Feature Structure                                                                                                                    | Score  | Multiple-Carcinogen in training set |
| FCFP_12                                | -1272709286 | <br><chem>[*]C([*])CO</chem>                      | -0.254 | 4 out of 16                         |
| FCFP_12                                | 3           | <br><chem>[*]O</chem>                             | -0.100 | 19 out of 62                        |
| FCFP_12                                | 0           | <br><chem>[*]C([*])[*]</chem>                    | -0.087 | 28 out of 90                        |



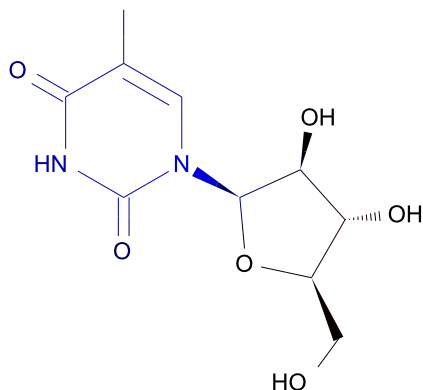

$C_{10}H_{14}N_2O_6$

Molecular Weight: 258.22795

ALogP: -2.005

Rotatable Bonds: 2

Acceptors: 6

Donors: 4

## Model Prediction

Prediction: Single-Carcinogen

Probability: 0.160

Enrichment: 0.532

Bayesian Score: -5.736

Mahalanobis Distance: 10.034

Mahalanobis Distance p-value: 0.0174

Prediction: Positive if the Bayesian score is above the estimated best cutoff value from minimizing the false positive and false negative rate.

Probability: The estimated probability that the sample is in the positive category. This assumes that the Bayesian score follows a normal distribution and is different from the prediction using a cutoff.

Enrichment: An estimate of enrichment, that is, the increased likelihood (versus random) of this sample being in the category.

Bayesian Score: The standard Laplacian-modified Bayesian score.

Mahalanobis Distance: The Mahalanobis distance (MD) is the distance to the center of the training data. The larger the MD, the less trustworthy the prediction.

Mahalanobis Distance p-value: The p-value gives the fraction of training data with an MD greater than or equal to the one for the given sample, assuming normally distributed data. The smaller the p-value, the less trustworthy the prediction. For highly non-normal X properties (e.g., fingerprints), the MD p-value is wildly inaccurate.

## Structural Similar Compounds

| Name               | Ganciclovir                                                         | Hydrochlorothiazide                                                 | Zalcitabine                                                         |
|--------------------|---------------------------------------------------------------------|---------------------------------------------------------------------|---------------------------------------------------------------------|
| Structure          |                                                                     |                                                                     |                                                                     |
| Actual Endpoint    | Multiple-Carcinogen                                                 | Single-Carcinogen                                                   | Single-Carcinogen                                                   |
| Predicted Endpoint | Multiple-Carcinogen                                                 | Single-Carcinogen                                                   | Single-Carcinogen                                                   |
| Distance           | 0.672                                                               | 0.754                                                               | 0.817                                                               |
| Reference          | US FDA (Centre for Drug Eval.& Res./Off. Testing & Res.) Sept. 1997 | US FDA (Centre for Drug Eval.& Res./Off. Testing & Res.) Sept. 1997 | US FDA (Centre for Drug Eval.& Res./Off. Testing & Res.) Sept. 1997 |

## Model Applicability

Unknown features are fingerprint features in the query molecule, but not found in the training set.

1. All properties and OPS components are within expected ranges.

## Feature Contribution

### Top features for positive contribution

| Fingerprint | Bit/Smiles  | Feature Structure                        | Score | Multiple-Carcinogen in training set |
|-------------|-------------|------------------------------------------|-------|-------------------------------------|
| FCFP_12     | -1043310069 | <br><chem>[*]C[C@H]1O[*]1[C@@H]1O</chem> | 0.597 | 7 out of 10                         |

|                                        |             |                                                                                                                                                  |        |                                     |
|----------------------------------------|-------------|--------------------------------------------------------------------------------------------------------------------------------------------------|--------|-------------------------------------|
| FCFP_12                                | 436886043   | 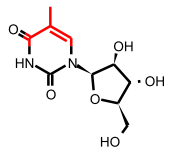<br><chem>[*]C=C(C(C)C(=[*]))[*]</chem>                       | 0.270  | 7 out of 15                         |
| FCFP_12                                | -2091721556 | <br><chem>[*]C@H1[*][*]O[C@@H]1CO</chem>                      | 0.174  | 1 out of 2                          |
| Top Features for negative contribution |             |                                                                                                                                                  |        |                                     |
| Fingerprint                            | Bit/Smiles  | Feature Structure                                                                                                                                | Score  | Multiple-Carcinogen in training set |
| FCFP_12                                | 451877515   | <br><chem>[*]N([*])C=C([*])[*]</chem>                         | -0.704 | 0 out of 3                          |
| FCFP_12                                | 566058135   | <br><chem>[*]NC(=O)C(=[*])[*]</chem>                        | -0.528 | 3 out of 17                         |
| FCFP_12                                | -548679521  | <br><chem>[*]N1[*]=C([*])C(=O)N</chem><br><chem>C1=O</chem> | -0.519 | 0 out of 2                          |



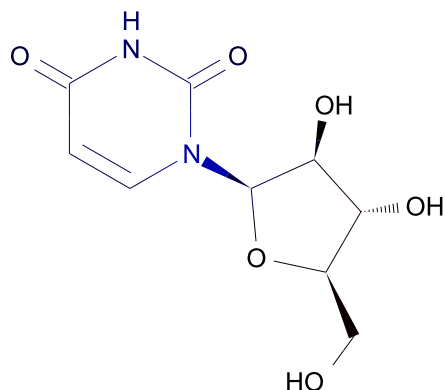

$C_9H_{12}N_2O_6$   
 Molecular Weight: 244.20137  
 ALogP: -2.451  
 Rotatable Bonds: 2  
 Acceptors: 6  
 Donors: 4

### Model Prediction

**Prediction: Multiple-Carcinogen**

Probability: 0.174

Enrichment: 0.577

Bayesian Score: -4.368

Mahalanobis Distance: 8.448

Mahalanobis Distance p-value: 0.162

Prediction: Positive if the Bayesian score is above the estimated best cutoff value from minimizing the false positive and false negative rate.

Probability: The estimated probability that the sample is in the positive category. This assumes that the Bayesian score follows a normal distribution and is different from the prediction using a cutoff.

Enrichment: An estimate of enrichment, that is, the increased likelihood (versus random) of this sample being in the category.

Bayesian Score: The standard Laplacian-modified Bayesian score.

Mahalanobis Distance: The Mahalanobis distance (MD) is the distance to the center of the training data. The larger the MD, the less trustworthy the prediction.

Mahalanobis Distance p-value: The p-value gives the fraction of training data with an MD greater than or equal to the one for the given sample, assuming normally distributed data. The smaller the p-value, the less trustworthy the prediction. For highly non-normal X properties (e.g., fingerprints), the MD p-value is wildly inaccurate.

### Structural Similar Compounds

| Name               | Ganciclovir                                                         | Hydrochlorothiazide                                                 | Zalcitabine                                                         |
|--------------------|---------------------------------------------------------------------|---------------------------------------------------------------------|---------------------------------------------------------------------|
| Structure          |                                                                     |                                                                     |                                                                     |
| Actual Endpoint    | Multiple-Carcinogen                                                 | Single-Carcinogen                                                   | Single-Carcinogen                                                   |
| Predicted Endpoint | Multiple-Carcinogen                                                 | Single-Carcinogen                                                   | Single-Carcinogen                                                   |
| Distance           | 0.670                                                               | 0.768                                                               | 0.807                                                               |
| Reference          | US FDA (Centre for Drug Eval.& Res./Off. Testing & Res.) Sept. 1997 | US FDA (Centre for Drug Eval.& Res./Off. Testing & Res.) Sept. 1997 | US FDA (Centre for Drug Eval.& Res./Off. Testing & Res.) Sept. 1997 |

### Model Applicability

Unknown features are fingerprint features in the query molecule, but not found in the training set.

1. All properties and OPS components are within expected ranges.

### Feature Contribution

#### Top features for positive contribution

| Fingerprint | Bit/Smiles  | Feature Structure                        | Score | Multiple-Carcinogen in training set |
|-------------|-------------|------------------------------------------|-------|-------------------------------------|
| FCFP_12     | -1043310069 | <br><chem>[*]C1C@H1O[*]C1C@@H1[*]</chem> | 0.597 | 7 out of 10                         |

|                                        |            |                                                                                                                                    |        |                                     |
|----------------------------------------|------------|------------------------------------------------------------------------------------------------------------------------------------|--------|-------------------------------------|
| FCFP_12                                | 451847724  | 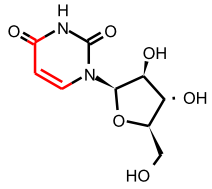<br><chem>[*]C=C/C(=[*])[*]</chem>              | 0.300  | 10 out of 21                        |
| FCFP_12                                | 1561767715 | <br><chem>[*]=C1[*]C=CC(=O)N1</chem>            | 0.239  | 2 out of 4                          |
| Top Features for negative contribution |            |                                                                                                                                    |        |                                     |
| Fingerprint                            | Bit/Smiles | Feature Structure                                                                                                                  | Score  | Multiple-Carcinogen in training set |
| FCFP_12                                | 451877515  | <br><chem>[*]N([*])C=C([*])[*]</chem>           | -0.704 | 0 out of 3                          |
| FCFP_12                                | 566058135  | <br><chem>[*]NC(=O)C(=[*])[*]</chem>          | -0.528 | 3 out of 17                         |
| FCFP_12                                | 201733902  | <br><chem>[*]C([*])N1C=[*]C(=[*])NC1=O</chem> | -0.519 | 0 out of 2                          |



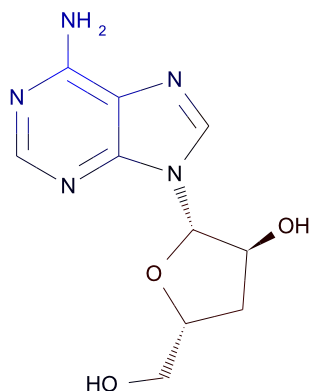
 $C_{10}H_{13}N_5O_3$ 

Molecular Weight: 251.24191

ALogP: -1.308

Rotatable Bonds: 2

Acceptors: 7

Donors: 3

## Model Prediction

Prediction: Multiple-Carcinogen

Probability: 0.172

Enrichment: 0.571

Bayesian Score: -4.515

Mahalanobis Distance: 10.631

Mahalanobis Distance p-value: 0.00656

Prediction: Positive if the Bayesian score is above the estimated best cutoff value from minimizing the false positive and false negative rate.

Probability: The estimated probability that the sample is in the positive category. This assumes that the Bayesian score follows a normal distribution and is different from the prediction using a cutoff.

Enrichment: An estimate of enrichment, that is, the increased likelihood (versus random) of this sample being in the category.

Bayesian Score: The standard Laplacian-modified Bayesian score.

Mahalanobis Distance: The Mahalanobis distance (MD) is the distance to the center of the training data. The larger the MD, the less trustworthy the prediction.

Mahalanobis Distance p-value: The p-value gives the fraction of training data with an MD greater than or equal to the one for the given sample, assuming normally distributed data. The smaller the p-value, the less trustworthy the prediction. For highly non-normal X properties (e.g., fingerprints), the MD p-value is wildly inaccurate.

## Structural Similar Compounds

| Name               | Triamterene                                                         | Ganciclovir                                                         | Hydrochlorothiazide                                                 |
|--------------------|---------------------------------------------------------------------|---------------------------------------------------------------------|---------------------------------------------------------------------|
| Structure          |                                                                     |                                                                     |                                                                     |
| Actual Endpoint    | Single-Carcinogen                                                   | Multiple-Carcinogen                                                 | Single-Carcinogen                                                   |
| Predicted Endpoint | Single-Carcinogen                                                   | Multiple-Carcinogen                                                 | Single-Carcinogen                                                   |
| Distance           | 0.655                                                               | 0.707                                                               | 0.734                                                               |
| Reference          | US FDA (Centre for Drug Eval.& Res./Off. Testing & Res.) Sept. 1997 | US FDA (Centre for Drug Eval.& Res./Off. Testing & Res.) Sept. 1997 | US FDA (Centre for Drug Eval.& Res./Off. Testing & Res.) Sept. 1997 |

## Model Applicability

Unknown features are fingerprint features in the query molecule, but not found in the training set.

1. All properties and OPS components are within expected ranges.
2. Unknown FCFP\_2 feature: 1315416442: [\*][C@H]1[\*][\*]O[C@@H]1n(:[\*]):[\*]

## Feature Contribution

### Top features for positive contribution

| Fingerprint | Bit/Smiles  | Feature Structure               | Score | Multiple-Carcinogen in training set |
|-------------|-------------|---------------------------------|-------|-------------------------------------|
| FCFP_12     | -1043310069 | <br>[*][C@H]1O[*][*][C@@H]1n[*] | 0.597 | 7 out of 10                         |

|                                        |             |                                                                                                                                             |        |                                     |
|----------------------------------------|-------------|---------------------------------------------------------------------------------------------------------------------------------------------|--------|-------------------------------------|
| FCFP_12                                | 355654354   | 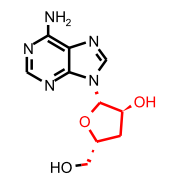<br><chem>[*]C[C@H]1C[C@H](O)C@@H](*)O1</chem>            | 0.579  | 2 out of 2                          |
| FCFP_12                                | -124685461  | <br><chem>[*]:n:[cH]:n:[*]</chem>                        | 0.400  | 1 out of 1                          |
| Top Features for negative contribution |             |                                                                                                                                             |        |                                     |
| Fingerprint                            | Bit/Smiles  | Feature Structure                                                                                                                           | Score  | Multiple-Carcinogen in training set |
| FCFP_12                                | 1069584379  | <br><chem>[*]:[c](:[*])N</chem>                          | -1.112 | 0 out of 6                          |
| FCFP_12                                | -1151884458 | <br><chem>[*]:n:[c](N):[c](:[*])[*]</chem>             | -1.112 | 0 out of 6                          |
| FCFP_12                                | 178336375   | <br><chem>[*][c](:[*]):[c]1:n:[*]:[*]:[c]:1:[*]</chem> | -0.994 | 0 out of 5                          |





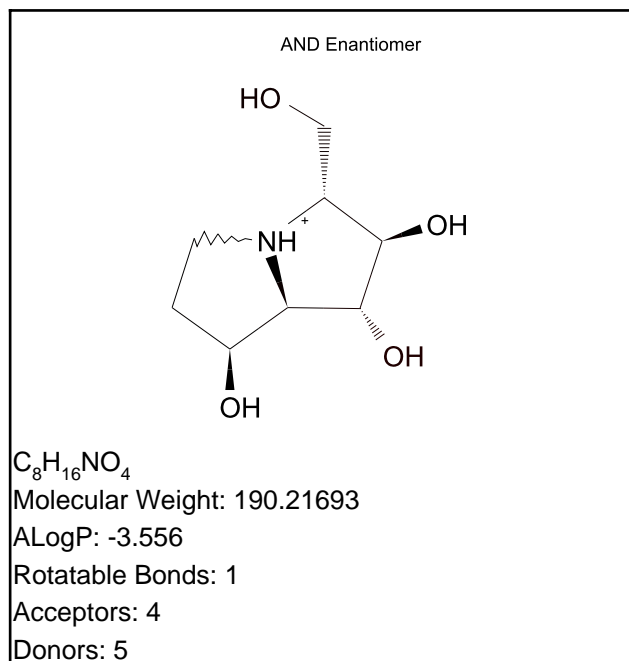

### Model Prediction

Prediction: **Moderate\_Severe**

Probability: 0.835

Enrichment: 1.212

Bayesian Score: 0.895

Mahalanobis Distance: 11.858

Mahalanobis Distance p-value: 0.000128

Prediction: Positive if the Bayesian score is above the estimated best cutoff value from minimizing the false positive and false negative rate.

Probability: The estimated probability that the sample is in the positive category. This assumes that the Bayesian score follows a normal distribution and is different from the prediction using a cutoff.

Enrichment: An estimate of enrichment, that is, the increased likelihood (versus random) of this sample being in the category.

Bayesian Score: The standard Laplacian-modified Bayesian score.

Mahalanobis Distance: The Mahalanobis distance (MD) is the distance to the center of the training data. The larger the MD, the less trustworthy the prediction.

Mahalanobis Distance p-value: The p-value gives the fraction of training data with an MD greater than or equal to the one for the given sample, assuming normally distributed data. The smaller the p-value, the less trustworthy the prediction. For highly non-normal X properties (e.g., fingerprints), the MD p-value is wildly inaccurate.

### Structural Similar Compounds

| Name               | 1;2-Ethanediamine; N-(2-aminoethyl)-N'-(2-((2-aminoethyl)amino)ethyl)-              | TRIETHYLENETETRAMINE                                                                | DIETHYLENETRIAMINE                                                                  |
|--------------------|-------------------------------------------------------------------------------------|-------------------------------------------------------------------------------------|-------------------------------------------------------------------------------------|
| Structure          | 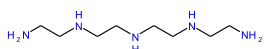 |  |  |
| Actual Endpoint    | Moderate_Severe                                                                     | Moderate_Severe                                                                     | Moderate_Severe                                                                     |
| Predicted Endpoint | Moderate_Severe                                                                     | Moderate_Severe                                                                     | Moderate_Severe                                                                     |
| Distance           | 0.776                                                                               | 0.786                                                                               | 0.966                                                                               |
| Reference          | Prehled Prumyslove Toxikologie; Organické Latky; Marhold; J. -;446;86               | UCDS**12/12/66                                                                      | JIHTAB 31;60;49                                                                     |

### Model Applicability

Unknown features are fingerprint features in the query molecule, but not found in the training set.

1. All properties and OPS components are within expected ranges.
2. Unknown FCFP\_2 feature: 10: [\*][NH+]([\*])[\*]
3. Unknown FCFP\_2 feature: -1853714334: [\*][C@@H]1[\*][\*][C@H]2[\*][\*]C[NH+]12
4. Unknown FCFP\_2 feature: -1817836174: [\*][C@H]1[\*][\*][NH+]2[\*][\*][C@H]([\*])C12
5. Unknown FCFP\_2 feature: 1155241219: [\*][NH+]1[\*][\*]CC1

### Feature Contribution

| Top features for positive contribution |             |                                                                                                      |       |                                 |
|----------------------------------------|-------------|------------------------------------------------------------------------------------------------------|-------|---------------------------------|
| Fingerprint                            | Bit/Smiles  | Feature Structure                                                                                    | Score | Moderate_Severe in training set |
| FCFP_10                                | -1272709286 | 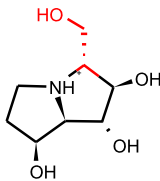<br>[*]C([*])CO | 0.285 | 234 out of 266                  |

|                                        |            |                                                                                                                                                                                                                                                                                                                                                                                                                                                                                                                                                                                                  |       |                                    |
|----------------------------------------|------------|--------------------------------------------------------------------------------------------------------------------------------------------------------------------------------------------------------------------------------------------------------------------------------------------------------------------------------------------------------------------------------------------------------------------------------------------------------------------------------------------------------------------------------------------------------------------------------------------------|-------|------------------------------------|
| FCFP_10                                | 1070061035 | 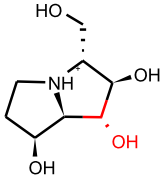 <p>Chemical structure showing a bicyclic molecule with a red bond. The structure consists of a five-membered ring fused to a six-membered ring, with a nitrogen atom in the five-membered ring. The six-membered ring has a hydroxyl group (OH) and a red bond. The five-membered ring has a hydroxyl group (OH) and a nitrogen atom (NH). The red bond is between the carbon atom of the five-membered ring and the carbon atom of the six-membered ring.</p> <p>[*]C([*])O</p>                             | 0.239 | 284 out of 338                     |
| FCFP_10                                | 1043250487 |  <p>Chemical structure showing a bicyclic molecule with a red bond. The structure consists of a five-membered ring fused to a six-membered ring, with a nitrogen atom in the five-membered ring. The six-membered ring has a hydroxyl group (OH) and a red bond. The five-membered ring has a hydroxyl group (OH) and a nitrogen atom (NH). The red bond is between the carbon atom of the five-membered ring and the carbon atom of the six-membered ring.</p> <p>[*][C@@H]1[*][*][C@H]<br/>([*])[C@H]1O</p> | 0.220 | 62 out of 75                       |
| Top Features for negative contribution |            |                                                                                                                                                                                                                                                                                                                                                                                                                                                                                                                                                                                                  |       |                                    |
| Fingerprint                            | Bit/Smiles | Feature Structure                                                                                                                                                                                                                                                                                                                                                                                                                                                                                                                                                                                | Score | Moderate_Severe<br>in training set |
| FCFP_10                                | 0          |  <p>Chemical structure showing a bicyclic molecule with a blue bond. The structure consists of a five-membered ring fused to a six-membered ring, with a nitrogen atom in the five-membered ring. The six-membered ring has a hydroxyl group (OH) and a blue bond. The five-membered ring has a hydroxyl group (OH) and a nitrogen atom (NH). The blue bond is between the carbon atom of the five-membered ring and the carbon atom of the six-membered ring.</p> <p>[*]C([*])[*]</p>                        | 0.000 | 811 out of 1184                    |

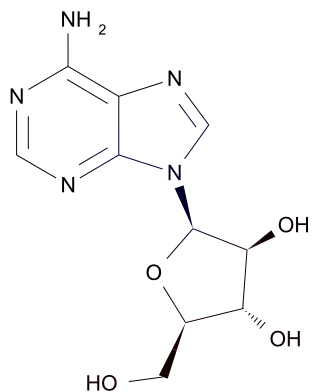

$C_{10}H_{13}N_5O_4$

Molecular Weight: 267.24132

ALogP: -1.881

Rotatable Bonds: 2

Acceptors: 8

Donors: 4

## Model Prediction

Prediction: Moderate\_Severe

Probability: 0.816

Enrichment: 1.185

Bayesian Score: -0.298

Mahalanobis Distance: 10.671

Mahalanobis Distance p-value: 0.0147

Prediction: Positive if the Bayesian score is above the estimated best cutoff value from minimizing the false positive and false negative rate.

Probability: The estimated probability that the sample is in the positive category. This assumes that the Bayesian score follows a normal distribution and is different from the prediction using a cutoff.

Enrichment: An estimate of enrichment, that is, the increased likelihood (versus random) of this sample being in the category.

Bayesian Score: The standard Laplacian-modified Bayesian score.

Mahalanobis Distance: The Mahalanobis distance (MD) is the distance to the center of the training data. The larger the MD, the less trustworthy the prediction.

Mahalanobis Distance p-value: The p-value gives the fraction of training data with an MD greater than or equal to the one for the given sample, assuming normally distributed data. The smaller the p-value, the less trustworthy the prediction. For highly non-normal X properties (e.g., fingerprints), the MD p-value is wildly inaccurate.

## Structural Similar Compounds

| Name               | 2,2'-Biphenyldisulfonic acid; 4,4'-diamino-                             | ANTHRAQUINONE;1;5-DIAMINO-4;8-DIHYDROXY- | ANTHRAQUINONE; 1;8-DIAMINO-4;5-DIHYDROXY- |
|--------------------|-------------------------------------------------------------------------|------------------------------------------|-------------------------------------------|
| Structure          |                                                                         |                                          |                                           |
| Actual Endpoint    | Mild                                                                    | Moderate_Severe                          | Moderate_Severe                           |
| Predicted Endpoint | Mild                                                                    | Mild                                     | Mild                                      |
| Distance           | 0.747                                                                   | 0.810                                    | 0.810                                     |
| Reference          | Prehled Prumyslove Toxikologie; Organické Latky; Marhold; J. pp 1061;86 | 28ZPAK-;103;72                           | 28ZPAK-;103;72                            |

## Model Applicability

Unknown features are fingerprint features in the query molecule, but not found in the training set.

1. All properties and OPS components are within expected ranges.
2. Unknown FCFP\_2 feature: -124685461: [\*]:n:c:n:[\*]
3. Unknown FCFP\_2 feature: -1564473960: [\*]n1:[\*]:[\*]:[c](:[\*]):[c]:1:n:[\*]
4. Unknown FCFP\_2 feature: -1151884458: [\*]:n:[c](N):[c](:[\*]):[\*]
5. Unknown FCFP\_2 feature: 1315416442: [\*][C@H]1[\*][\*]O[C@H]1n(:[\*]):[\*]

## Feature Contribution

### Top features for positive contribution

| Fingerprint | Bit/Smiles | Feature Structure | Score | Moderate_Severe in training set |
|-------------|------------|-------------------|-------|---------------------------------|
|             |            |                   |       |                                 |

|                                        |             |                                                                                                                                    |        |                                    |
|----------------------------------------|-------------|------------------------------------------------------------------------------------------------------------------------------------|--------|------------------------------------|
| FCFP_10                                | -1272709286 | 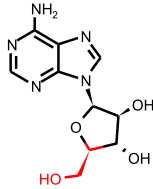<br>[*]C([*])CO                                 | 0.285  | 234 out of 266                     |
| FCFP_10                                | 1070061035  | <br>[*]C([*])O                                  | 0.239  | 284 out of 338                     |
| FCFP_10                                | -1043250487 | <br>[*][C@@H]1[*][*][C@H]<br>([*])[C@H]1O       | 0.220  | 62 out of 75                       |
| Top Features for negative contribution |             |                                                                                                                                    |        |                                    |
| Fingerprint                            | Bit/Smiles  | Feature Structure                                                                                                                  | Score  | Moderate_Severe<br>in training set |
| FCFP_10                                | -306856457  | <br>[*]C([*])n1:[cH]:[*]:<br>[*]:[c]:1:[*]     | -0.842 | 0 out of 2                         |
| FCFP_10                                | 178336375   | <br>[*][c](:[*]):[c]1:n:[*]:<br>[*]:[c]:1:[*] | -0.209 | 10 out of 19                       |

|         |            |                                                                                                                                                                                                                                                                                                                                                                      |        |              |
|---------|------------|----------------------------------------------------------------------------------------------------------------------------------------------------------------------------------------------------------------------------------------------------------------------------------------------------------------------------------------------------------------------|--------|--------------|
| FCFP_10 | 1069584379 | 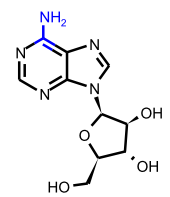 <p>Chemical structure of 2-amino-9-((2R,3R)-2,3-dihydroxybutan-1-yl)-1H-imidazo[4,5-b]pyrimidine. The structure shows a purine-like core with an amino group at position 2 and a (2R,3R)-2,3-dihydroxybutan-1-yl group at position 9. The amino group is highlighted in blue.</p> | -0.196 | 46 out of 85 |
|---------|------------|----------------------------------------------------------------------------------------------------------------------------------------------------------------------------------------------------------------------------------------------------------------------------------------------------------------------------------------------------------------------|--------|--------------|

[\*]:[c](:[\*])N

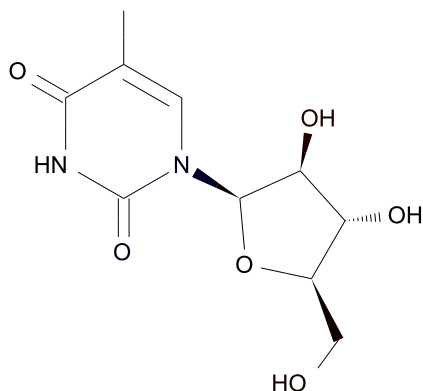
 $C_{10}H_{14}N_2O_6$ 

Molecular Weight: 258.22795

ALogP: -2.005

Rotatable Bonds: 2

Acceptors: 6

Donors: 4

## Model Prediction

Prediction: Moderate\_Severe

Probability: 0.829

Enrichment: 1.204

Bayesian Score: 0.471

Mahalanobis Distance: 15.556

Mahalanobis Distance p-value: 1.42e-015

Prediction: Positive if the Bayesian score is above the estimated best cutoff value from minimizing the false positive and false negative rate.

Probability: The estimated probability that the sample is in the positive category. This assumes that the Bayesian score follows a normal distribution and is different from the prediction using a cutoff.

Enrichment: An estimate of enrichment, that is, the increased likelihood (versus random) of this sample being in the category.

Bayesian Score: The standard Laplacian-modified Bayesian score.

Mahalanobis Distance: The Mahalanobis distance (MD) is the distance to the center of the training data. The larger the MD, the less trustworthy the prediction.

Mahalanobis Distance p-value: The p-value gives the fraction of training data with an MD greater than or equal to the one for the given sample, assuming normally distributed data. The smaller the p-value, the less trustworthy the prediction. For highly non-normal X properties (e.g., fingerprints), the MD p-value is wildly inaccurate.

## Structural Similar Compounds

| Name               | ANTHRAQUINONE;1;5-DIAMINO-4;8-DIHYDROXY- | ANTHRAQUINONE; 1;8-DIAMINO-4;5-DIHYDROXY- | TRIETHYLENETETRAMINE |
|--------------------|------------------------------------------|-------------------------------------------|----------------------|
| Structure          |                                          |                                           |                      |
| Actual Endpoint    | Moderate_Severe                          | Moderate_Severe                           | Moderate_Severe      |
| Predicted Endpoint | Mild                                     | Mild                                      | Moderate_Severe      |
| Distance           | 0.770                                    | 0.771                                     | 0.781                |
| Reference          | 28ZPAK-;103;72                           | 28ZPAK-;103;72                            | UCDS**12/12/66       |

## Model Applicability

Unknown features are fingerprint features in the query molecule, but not found in the training set.

1. All properties and OPS components are within expected ranges.

## Feature Contribution

### Top features for positive contribution

| Fingerprint | Bit/Smiles  | Feature Structure | Score | Moderate_Severe in training set |
|-------------|-------------|-------------------|-------|---------------------------------|
| FCFP_10     | -1272709286 | <br>[*]C([*])CO   | 0.285 | 234 out of 266                  |

|                                        |             |                                                                                                                                       |        |                                    |
|----------------------------------------|-------------|---------------------------------------------------------------------------------------------------------------------------------------|--------|------------------------------------|
| FCFP_10                                | -885550502  | 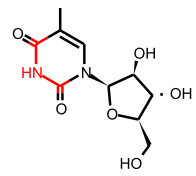<br><chem>[*]C(=[*])NC(=[*])[*]</chem>             | 0.239  | 54 out of 64                       |
| FCFP_10                                | 1070061035  | <br><chem>[*]C([*])O</chem>                        | 0.239  | 284 out of 338                     |
| Top Features for negative contribution |             |                                                                                                                                       |        |                                    |
| Fingerprint                            | Bit/Smiles  | Feature Structure                                                                                                                     | Score  | Moderate_Severe<br>in training set |
| FCFP_10                                | -1986098826 | <br><chem>[*]NC(=O)N([*])[*]</chem>                | -0.361 | 2 out of 5                         |
| FCFP_10                                | 451877515   | <br><chem>[*]N([*])C=C([*])[*]</chem>             | -0.350 | 16 out of 35                       |
| FCFP_10                                | 699500266   | <br><chem>[*][C@H]1[*][*]O[C@H]1N([*])[*]</chem> | -0.103 | 16 out of 27                       |



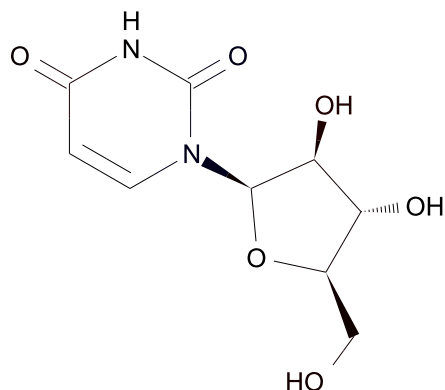

$C_9H_{12}N_2O_6$

Molecular Weight: 244.20137

ALogP: -2.451

Rotatable Bonds: 2

Acceptors: 6

Donors: 4

## Model Prediction

Prediction: Moderate\_Severe

Probability: 0.831

Enrichment: 1.206

Bayesian Score: 0.573

Mahalanobis Distance: 15.956

Mahalanobis Distance p-value: 4.12e-017

Prediction: Positive if the Bayesian score is above the estimated best cutoff value from minimizing the false positive and false negative rate.

Probability: The estimated probability that the sample is in the positive category. This assumes that the Bayesian score follows a normal distribution and is different from the prediction using a cutoff.

Enrichment: An estimate of enrichment, that is, the increased likelihood (versus random) of this sample being in the category.

Bayesian Score: The standard Laplacian-modified Bayesian score.

Mahalanobis Distance: The Mahalanobis distance (MD) is the distance to the center of the training data. The larger the MD, the less trustworthy the prediction.

Mahalanobis Distance p-value: The p-value gives the fraction of training data with an MD greater than or equal to the one for the given sample, assuming normally distributed data. The smaller the p-value, the less trustworthy the prediction. For highly non-normal X properties (e.g., fingerprints), the MD p-value is wildly inaccurate.

## Structural Similar Compounds

| Name               | TRIETHYLENETETRAMIN E | ANTHRAQUINONE;1;5-DIAMINO-4;8-DIHYDROXY- | ANTHRAQUINONE; 1;8-DIAMINO-4;5-DIHYDROXY- |
|--------------------|-----------------------|------------------------------------------|-------------------------------------------|
| Structure          |                       |                                          |                                           |
| Actual Endpoint    | Moderate_Severe       | Moderate_Severe                          | Moderate_Severe                           |
| Predicted Endpoint | Moderate_Severe       | Mild                                     | Mild                                      |
| Distance           | 0.794                 | 0.815                                    | 0.816                                     |
| Reference          | UCDS**12/12/66        | 28ZPAK-;103;72                           | 28ZPAK-;103;72                            |

## Model Applicability

Unknown features are fingerprint features in the query molecule, but not found in the training set.

1. All properties and OPS components are within expected ranges.

## Feature Contribution

### Top features for positive contribution

| Fingerprint | Bit/Smiles  | Feature Structure | Score | Moderate_Severe in training set |
|-------------|-------------|-------------------|-------|---------------------------------|
| FCFP_10     | -1272709286 | <br>[*]C([*])CO   | 0.285 | 234 out of 266                  |

| FCFP_10                                | -885550502  | 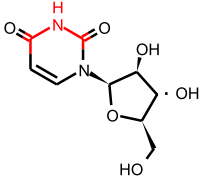<br><chem>[*]C(=[*])NC(=[*])[*]</chem>             | 0.239  | 54 out of 64                       |
|----------------------------------------|-------------|---------------------------------------------------------------------------------------------------------------------------------------|--------|------------------------------------|
| FCFP_10                                | 1070061035  | <br><chem>[*]C([*])O</chem>                        | 0.239  | 284 out of 338                     |
| Top Features for negative contribution |             |                                                                                                                                       |        |                                    |
| Fingerprint                            | Bit/Smiles  | Feature Structure                                                                                                                     | Score  | Moderate_Severe<br>in training set |
| FCFP_10                                | -1986098826 | <br><chem>[*]NC(=O)N([*])[*]</chem>                | -0.361 | 2 out of 5                         |
| FCFP_10                                | 451877515   | <br><chem>[*]N([*])C=C([*])[*]</chem>            | -0.350 | 16 out of 35                       |
| FCFP_10                                | 699500266   | <br><chem>[*][C@H]1[*][*]O[C@H]1N([*])[*]</chem> | -0.103 | 16 out of 27                       |

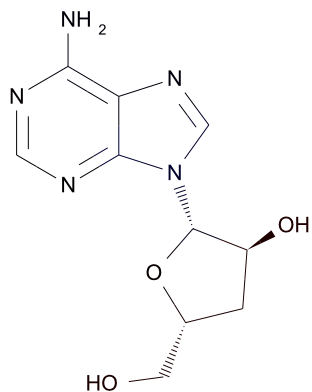
 $C_{10}H_{13}N_5O_3$ 

Molecular Weight: 251.24191

ALogP: -1.308

Rotatable Bonds: 2

Acceptors: 7

Donors: 3

## Model Prediction

Prediction: Moderate\_Severe

Probability: 0.820

Enrichment: 1.190

Bayesian Score: -0.093

Mahalanobis Distance: 9.811

Mahalanobis Distance p-value: 0.144

Prediction: Positive if the Bayesian score is above the estimated best cutoff value from minimizing the false positive and false negative rate.

Probability: The estimated probability that the sample is in the positive category. This assumes that the Bayesian score follows a normal distribution and is different from the prediction using a cutoff.

Enrichment: An estimate of enrichment, that is, the increased likelihood (versus random) of this sample being in the category.

Bayesian Score: The standard Laplacian-modified Bayesian score.

Mahalanobis Distance: The Mahalanobis distance (MD) is the distance to the center of the training data. The larger the MD, the less trustworthy the prediction.

Mahalanobis Distance p-value: The p-value gives the fraction of training data with an MD greater than or equal to the one for the given sample, assuming normally distributed data. The smaller the p-value, the less trustworthy the prediction. For highly non-normal X properties (e.g., fingerprints), the MD p-value is wildly inaccurate.

## Structural Similar Compounds

| Name               | 2-NAPHTHALENESULFONIC ACID; 6-AMINO-5-SULFOMETHYL- | 1;5-NAPHTHALENEDISULFONIC ACID;2-AMINO- | 1;5-NAPHTHALENEDISULFONIC ACID;3-AMINO- |
|--------------------|----------------------------------------------------|-----------------------------------------|-----------------------------------------|
| Structure          |                                                    |                                         |                                         |
| Actual Endpoint    | Mild                                               | Moderate_Severe                         | Moderate_Severe                         |
| Predicted Endpoint | Mild                                               | Mild                                    | Moderate_Severe                         |
| Distance           | 0.718                                              | 0.729                                   | 0.730                                   |
| Reference          | 28ZPAK 190;72                                      | 28ZPAK-;188;72                          | 28ZPAK-;189;72                          |

## Model Applicability

Unknown features are fingerprint features in the query molecule, but not found in the training set.

1. All properties and OPS components are within expected ranges.
2. Unknown FCFP\_2 feature: -124685461: [\*]:n:c:n:[\*]
3. Unknown FCFP\_2 feature: -1564473960: [\*]n1:[\*]:[\*]:[c](:[\*]):[c]:1:n:[\*]
4. Unknown FCFP\_2 feature: -1151884458: [\*]:n:[c](N):[c](:[\*]):[\*]
5. Unknown FCFP\_2 feature: 1315416442: [\*][C@H]1[\*][\*]O[C@H]1n(:[\*]):[\*]

## Feature Contribution

### Top features for positive contribution

| Fingerprint | Bit/Smiles  | Feature Structure | Score | Moderate_Severe in training set |
|-------------|-------------|-------------------|-------|---------------------------------|
| FCFP_10     | -1272709286 | <br>[*]C(*)CO     | 0.285 | 234 out of 266                  |

|                                        |             |                                                                                                                                            |        |                                 |
|----------------------------------------|-------------|--------------------------------------------------------------------------------------------------------------------------------------------|--------|---------------------------------|
| FCFP_10                                | 1070061035  | 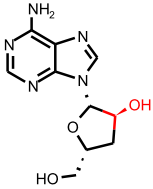<br><chem>[*]C([*])O</chem>                             | 0.239  | 284 out of 338                  |
| FCFP_10                                | -1043250487 | <br><chem>[*][C@@H]1[*][*][C@H]([*])[C@H]1O</chem>      | 0.220  | 62 out of 75                    |
| Top Features for negative contribution |             |                                                                                                                                            |        |                                 |
| Fingerprint                            | Bit/Smiles  | Feature Structure                                                                                                                          | Score  | Moderate_Severe in training set |
| FCFP_10                                | -306856457  | <br><chem>[*]C([*])n1:[cH]:[*]:[*]:[c]:1:[*]</chem>     | -0.842 | 0 out of 2                      |
| FCFP_10                                | 178336375   | <br><chem>[*][c](:[*]):[c]1:n:[*]:[*]:[c]:1:[*]</chem> | -0.209 | 10 out of 19                    |
| FCFP_10                                | 1069584379  | <br><chem>[*]:[c](:[*])N</chem>                       | -0.196 | 46 out of 85                    |

# Ribavirin

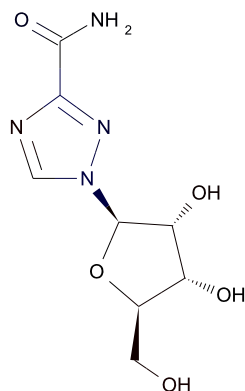

$C_8H_{12}N_4O_5$

Molecular Weight: 244.20467

ALogP: -2.745

Rotatable Bonds: 3

Acceptors: 7

Donors: 4

## Model Prediction

Prediction: Mild

Probability: 0.807

Enrichment: 1.172

Bayesian Score: -0.711

Mahalanobis Distance: 10.957

Mahalanobis Distance p-value: 0.00555

Prediction: Positive if the Bayesian score is above the estimated best cutoff value from minimizing the false positive and false negative rate.

Probability: The estimated probability that the sample is in the positive category. This assumes that the Bayesian score follows a normal distribution and is different from the prediction using a cutoff.

Enrichment: An estimate of enrichment, that is, the increased likelihood (versus random) of this sample being in the category.

Bayesian Score: The standard Laplacian-modified Bayesian score.

Mahalanobis Distance: The Mahalanobis distance (MD) is the distance to the center of the training data. The larger the MD, the less trustworthy the prediction.

Mahalanobis Distance p-value: The p-value gives the fraction of training data with an MD greater than or equal to the one for the given sample, assuming normally distributed data. The smaller the p-value, the less trustworthy the prediction. For highly non-normal X properties (e.g., fingerprints), the MD p-value is wildly inaccurate.

# TOPKAT\_Ocular\_Irritancy\_Mild\_vs\_Moderate\_Severe

## Structural Similar Compounds

| Name               | P-BENZENEDISULFONIC ACID;2-AMINO- | 2;2'-Biphenyldisulfonic acid; 4;4'-diamino-                             | BENZENE-1;3-DICARBOXYLIC ACID;5-SULFO- |
|--------------------|-----------------------------------|-------------------------------------------------------------------------|----------------------------------------|
| Structure          |                                   |                                                                         |                                        |
| Actual Endpoint    | Moderate_Severe                   | Mild                                                                    | Moderate_Severe                        |
| Predicted Endpoint | Mild                              | Mild                                                                    | Moderate_Severe                        |
| Distance           | 0.820                             | 0.842                                                                   | 0.848                                  |
| Reference          | 28ZPAK-;182;72                    | Prehled Prumyslove Toxikologie; Organicke Latky; Marhold; J. pp 1061;86 | 28ZPAK-;184;72                         |

## Model Applicability

Unknown features are fingerprint features in the query molecule, but not found in the training set.

1. All properties and OPS components are within expected ranges.
2. Unknown FCFP\_2 feature: -2049666792: [\*]C([\*])n1:n:[\*]:[\*]:c:1
3. Unknown FCFP\_2 feature: -124685461: [\*]:n:c:n:[\*]
4. Unknown FCFP\_2 feature: 1315416442: [\*][C@H]1[\*][\*]O[C@H]1n(:[\*]):[\*]

## Feature Contribution

| Top features for positive contribution |             |                                      |       |                                 |
|----------------------------------------|-------------|--------------------------------------|-------|---------------------------------|
| Fingerprint                            | Bit/Smiles  | Feature Structure                    | Score | Moderate Severe in training set |
| FCFP_10                                | -1539162406 | <br>[*]C(=[*])[c]1:n:[*]:<br>[*]:n:1 | 0.294 | 3 out of 3                      |

|                                        |             |                                                                                                                               |        |                                 |
|----------------------------------------|-------------|-------------------------------------------------------------------------------------------------------------------------------|--------|---------------------------------|
| FCFP_10                                | -1272709286 | 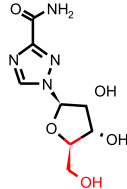<br><chem>[*]C([*])CO</chem>               | 0.285  | 234 out of 266                  |
| FCFP_10                                | 1070061035  | <br><chem>[*]C([*])O</chem>                | 0.239  | 284 out of 338                  |
| Top Features for negative contribution |             |                                                                                                                               |        |                                 |
| Fingerprint                            | Bit/Smiles  | Feature Structure                                                                                                             | Score  | Moderate_Severe in training set |
| FCFP_10                                | 4427049     | <br><chem>[*]n1:[*]:[*]:[c]([*])n:1</chem> | -1.293 | 0 out of 4                      |
| FCFP_10                                | -1549103449 | <br><chem>[*]:[c](:[*])C(=O)N</chem>      | -0.504 | 2 out of 6                      |
| FCFP_10                                | 1872154524  | <br><chem>[*]C(=O)[*]</chem>             | -0.078 | 344 out of 563                  |

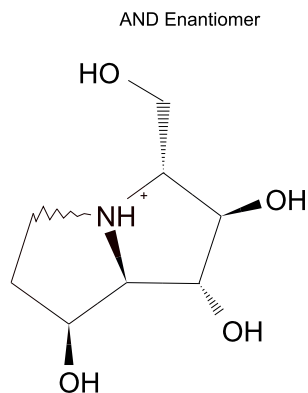
 $C_8H_{16}NO_4$ 

Molecular Weight: 190.21693

ALogP: -3.556

Rotatable Bonds: 1

Acceptors: 4

Donors: 5

## Model Prediction

Prediction: Severe

Probability: 0.693

Enrichment: 1.117

Bayesian Score: 0.037

Mahalanobis Distance: 10.310

Mahalanobis Distance p-value: 0.0173

Prediction: Positive if the Bayesian score is above the estimated best cutoff value from minimizing the false positive and false negative rate.

Probability: The estimated probability that the sample is in the positive category. This assumes that the Bayesian score follows a normal distribution and is different from the prediction using a cutoff.

Enrichment: An estimate of enrichment, that is, the increased likelihood (versus random) of this sample being in the category.

Bayesian Score: The standard Laplacian-modified Bayesian score.

Mahalanobis Distance: The Mahalanobis distance (MD) is the distance to the center of the training data. The larger the MD, the less trustworthy the prediction.

Mahalanobis Distance p-value: The p-value gives the fraction of training data with an MD greater than or equal to the one for the given sample, assuming normally distributed data. The smaller the p-value, the less trustworthy the prediction. For highly non-normal X properties (e.g., fingerprints), the MD p-value is wildly inaccurate.

## Structural Similar Compounds

| Name               | 1;2-Ethanediamine; N-(2-aminoethyl)-N'-(2-((2-aminoethyl)amino)ethyl)- | TRIETHYLENETETRAMIN E | ETHANOL; 2-((2-AMINOETHYL)AMINO)- |
|--------------------|------------------------------------------------------------------------|-----------------------|-----------------------------------|
| Structure          |                                                                        |                       |                                   |
| Actual Endpoint    | Moderate                                                               | Moderate              | Severe                            |
| Predicted Endpoint | Moderate                                                               | Moderate              | Severe                            |
| Distance           | 0.801                                                                  | 0.829                 | 1.004                             |
| Reference          | Prehled Prumyslove Toxikologie; Organické Latky; Marhold; J. -;446;86  | UCDS**12/12/66        | UCDS** 7/19/65                    |

## Model Applicability

Unknown features are fingerprint features in the query molecule, but not found in the training set.

1. All properties and OPS components are within expected ranges.

## Feature Contribution

### Top features for positive contribution

| Fingerprint | Bit/Smiles | Feature Structure    | Score | Severe in training set |
|-------------|------------|----------------------|-------|------------------------|
| SCFP_12     | 11         | <br>[*][NH+]([*])[*] | 0.218 | 1 out of 1             |

| SCFP_12                                | -1396915742 | 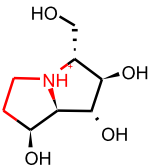<br><chem>[*][NH+]1[*][*]CC1</chem>                | 0.218  | 1 out of 1             |
|----------------------------------------|-------------|---------------------------------------------------------------------------------------------------------------------------------------|--------|------------------------|
| SCFP_12                                | -1272798659 | <br><chem>[*][C@@H]1[*][*]CC1</chem>               | 0.139  | 216 out of 309         |
| Top Features for negative contribution |             |                                                                                                                                       |        |                        |
| Fingerprint                            | Bit/Smiles  | Feature Structure                                                                                                                     | Score  | Severe in training set |
| SCFP_12                                | 1702634808  | <br><chem>[*][C@@H]1[*][*][C@H]([*])[C@H]1O</chem> | -0.072 | 48 out of 85           |
| SCFP_12                                | 0           | <br><chem>[*]C([*])[*]</chem>                     | 0.000  | 463 out of 727         |
| SCFP_12                                | -711686199  | <br><chem>[*]C([*])CO</chem>                     | 0.000  | 173 out of 293         |



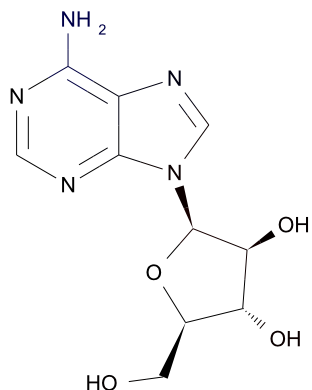
 $C_{10}H_{13}N_5O_4$ 

Molecular Weight: 267.24132

ALogP: -1.881

Rotatable Bonds: 2

Acceptors: 8

Donors: 4

## Model Prediction

Prediction: Moderate

Probability: 0.590

Enrichment: 0.952

Bayesian Score: -2.452

Mahalanobis Distance: 9.737

Mahalanobis Distance p-value: 0.0828

Prediction: Positive if the Bayesian score is above the estimated best cutoff value from minimizing the false positive and false negative rate.

Probability: The estimated probability that the sample is in the positive category. This assumes that the Bayesian score follows a normal distribution and is different from the prediction using a cutoff.

Enrichment: An estimate of enrichment, that is, the increased likelihood (versus random) of this sample being in the category.

Bayesian Score: The standard Laplacian-modified Bayesian score.

Mahalanobis Distance: The Mahalanobis distance (MD) is the distance to the center of the training data. The larger the MD, the less trustworthy the prediction.

Mahalanobis Distance p-value: The p-value gives the fraction of training data with an MD greater than or equal to the one for the given sample, assuming normally distributed data. The smaller the p-value, the less trustworthy the prediction. For highly non-normal X properties (e.g., fingerprints), the MD p-value is wildly inaccurate.

## Structural Similar Compounds

| Name               | ANTHRAQUINONE;1;5-DIAMINO-4;8-DIHYDROXY- | ANTHRAQUINONE; 1;8-DIAMINO-4;5-DIHYDROXY- | 1;5-NAPHTHALENEDISULFONIC ACID;2-AMINO- |
|--------------------|------------------------------------------|-------------------------------------------|-----------------------------------------|
| Structure          |                                          |                                           |                                         |
| Actual Endpoint    | Moderate                                 | Moderate                                  | Moderate                                |
| Predicted Endpoint | Moderate                                 | Moderate                                  | Moderate                                |
| Distance           | 0.826                                    | 0.827                                     | 0.860                                   |
| Reference          | 28ZPAK-;103;72                           | 28ZPAK-;103;72                            | 28ZPAK-;188;72                          |

## Model Applicability

Unknown features are fingerprint features in the query molecule, but not found in the training set.

1. All properties and OPS components are within expected ranges.

## Feature Contribution

### Top features for positive contribution

| Fingerprint | Bit/Smiles | Feature Structure                                                    | Score | Severe in training set |
|-------------|------------|----------------------------------------------------------------------|-------|------------------------|
| SCFP_12     | -443505090 | <br><chem>[*]C([*])n1:[cH]:[*]:</chem><br><chem>[*]:[c]:1:[*]</chem> | 0.218 | 1 out of 1             |

|                                        |             |                                                                                                                                             |        |                        |
|----------------------------------------|-------------|---------------------------------------------------------------------------------------------------------------------------------------------|--------|------------------------|
| SCFP_12                                | -1715619483 | 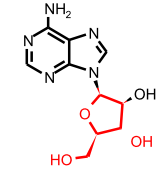<br><chem>[*]C@@H]1O[C@H](CO)[C@@H](O)[C@H]1[*]</chem>   | 0.218  | 1 out of 1             |
| SCFP_12                                | -424515134  | <br><chem>[*]C([*])O</chem>                              | 0.099  | 141 out of 210         |
| Top Features for negative contribution |             |                                                                                                                                             |        |                        |
| Fingerprint                            | Bit/Smiles  | Feature Structure                                                                                                                           | Score  | Severe in training set |
| SCFP_12                                | 384920865   | <br><chem>[*]:[c](:[*])N</chem>                          | -0.968 | 10 out of 46           |
| SCFP_12                                | 10          | <br><chem>[*]N</chem>                                   | -0.451 | 43 out of 112          |
| SCFP_12                                | 112554633   | <br><chem>[*][c](:[*]):[c]1:n:[*]:[*]:[c]:1:[*]</chem> | -0.324 | 5 out of 12            |

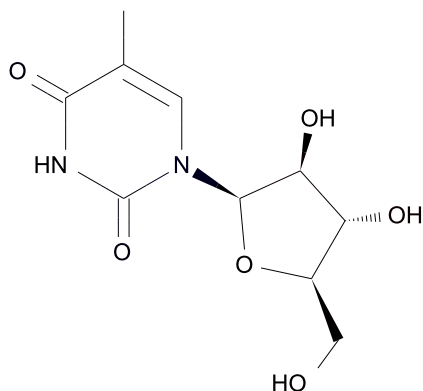
 $C_{10}H_{14}N_2O_6$ 

Molecular Weight: 258.22795

ALogP: -2.005

Rotatable Bonds: 2

Acceptors: 6

Donors: 4

## Model Prediction

Prediction: Moderate

Probability: 0.622

Enrichment: 1.004

Bayesian Score: -1.775

Mahalanobis Distance: 12.021

Mahalanobis Distance p-value: 1.5e-005

Prediction: Positive if the Bayesian score is above the estimated best cutoff value from minimizing the false positive and false negative rate.

Probability: The estimated probability that the sample is in the positive category. This assumes that the Bayesian score follows a normal distribution and is different from the prediction using a cutoff.

Enrichment: An estimate of enrichment, that is, the increased likelihood (versus random) of this sample being in the category.

Bayesian Score: The standard Laplacian-modified Bayesian score.

Mahalanobis Distance: The Mahalanobis distance (MD) is the distance to the center of the training data. The larger the MD, the less trustworthy the prediction.

Mahalanobis Distance p-value: The p-value gives the fraction of training data with an MD greater than or equal to the one for the given sample, assuming normally distributed data. The smaller the p-value, the less trustworthy the prediction. For highly non-normal X properties (e.g., fingerprints), the MD p-value is wildly inaccurate.

## Structural Similar Compounds

| Name               | ANTHRAQUINONE;1;5-DIAMINO-4;8-DIHYDROXY- | ANTHRAQUINONE; 1;8-DIAMINO-4;5-DIHYDROXY- | TRIETHYLENETETRAMINE |
|--------------------|------------------------------------------|-------------------------------------------|----------------------|
| Structure          |                                          |                                           |                      |
| Actual Endpoint    | Moderate                                 | Moderate                                  | Moderate             |
| Predicted Endpoint | Moderate                                 | Moderate                                  | Moderate             |
| Distance           | 0.785                                    | 0.786                                     | 0.813                |
| Reference          | 28ZPAK-;103;72                           | 28ZPAK-;103;72                            | UCDS**12/12/66       |

## Model Applicability

Unknown features are fingerprint features in the query molecule, but not found in the training set.

1. All properties and OPS components are within expected ranges.

## Feature Contribution

### Top features for positive contribution

| Fingerprint | Bit/Smiles  | Feature Structure                          | Score | Severe in training set |
|-------------|-------------|--------------------------------------------|-------|------------------------|
| SCFP_12     | -1715619483 | <br>[*][C@@H]1O[C@H](CO)[C@@H](O)[C@H]1[*] | 0.218 | 1 out of 1             |

| SCFP_12                                | 1631785938  | 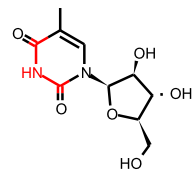<br><chem>[*]C(=[*])NC(=[*])[*]</chem>        | 0.218  | 1 out of 1             |
|----------------------------------------|-------------|----------------------------------------------------------------------------------------------------------------------------------|--------|------------------------|
| SCFP_12                                | -1971435055 | <br><chem>[*]N([*])C=C([*])[*]</chem>         | 0.153  | 3 out of 4             |
| Top Features for negative contribution |             |                                                                                                                                  |        |                        |
| Fingerprint                            | Bit/Smiles  | Feature Structure                                                                                                                | Score  | Severe in training set |
| SCFP_12                                | 9           | <br><chem>[*]N([*])[*]</chem>                 | -0.315 | 29 out of 66           |
| SCFP_12                                | 399659969   | <br><chem>[*]C([*])N(C=[*])C(=[*])[*]</chem> | -0.298 | 2 out of 5             |
| SCFP_12                                | 1257024795  | <br><chem>[*]NC(=O)C(=[*])[*]</chem>        | -0.248 | 5 out of 11            |

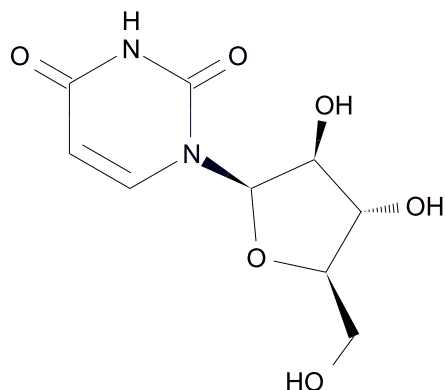

$C_9H_{12}N_2O_6$

Molecular Weight: 244.20137

ALogP: -2.451

Rotatable Bonds: 2

Acceptors: 6

Donors: 4

## Model Prediction

Prediction: Moderate

Probability: 0.625

Enrichment: 1.009

Bayesian Score: -1.707

Mahalanobis Distance: 11.729

Mahalanobis Distance p-value: 6.38e-005

Prediction: Positive if the Bayesian score is above the estimated best cutoff value from minimizing the false positive and false negative rate.

Probability: The estimated probability that the sample is in the positive category. This assumes that the Bayesian score follows a normal distribution and is different from the prediction using a cutoff.

Enrichment: An estimate of enrichment, that is, the increased likelihood (versus random) of this sample being in the category.

Bayesian Score: The standard Laplacian-modified Bayesian score.

Mahalanobis Distance: The Mahalanobis distance (MD) is the distance to the center of the training data. The larger the MD, the less trustworthy the prediction.

Mahalanobis Distance p-value: The p-value gives the fraction of training data with an MD greater than or equal to the one for the given sample, assuming normally distributed data. The smaller the p-value, the less trustworthy the prediction. For highly non-normal X properties (e.g., fingerprints), the MD p-value is wildly inaccurate.

## Structural Similar Compounds

| Name               | TRIETHYLENETETRAMINE | ANTHRAQUINONE;1;5-DIAMINO-4;8-DIHYDROXY- | ANTHRAQUINONE; 1;8-DIAMINO-4;5-DIHYDROXY- |
|--------------------|----------------------|------------------------------------------|-------------------------------------------|
| Structure          |                      |                                          |                                           |
| Actual Endpoint    | Moderate             | Moderate                                 | Moderate                                  |
| Predicted Endpoint | Moderate             | Moderate                                 | Moderate                                  |
| Distance           | 0.830                | 0.833                                    | 0.833                                     |
| Reference          | UCDS**12/12/66       | 28ZPAK-;103;72                           | 28ZPAK-;103;72                            |

## Model Applicability

Unknown features are fingerprint features in the query molecule, but not found in the training set.

1. All properties and OPS components are within expected ranges.

## Feature Contribution

### Top features for positive contribution

| Fingerprint | Bit/Smiles  | Feature Structure                        | Score | Severe in training set |
|-------------|-------------|------------------------------------------|-------|------------------------|
| SCFP_12     | -1715619483 | <br>[*][C@@H]1O[C@H](CO)[C@@H](O)[C@H]1O | 0.218 | 1 out of 1             |

|                                        |             |                                                                                                                                   |        |                        |
|----------------------------------------|-------------|-----------------------------------------------------------------------------------------------------------------------------------|--------|------------------------|
| SCFP_12                                | 1631785938  | 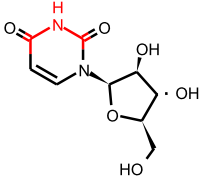<br><chem>[*]C(=[*])NC(=[*])[*]</chem>         | 0.218  | 1 out of 1             |
| SCFP_12                                | -1971435055 | <br><chem>[*]N([*])C=C([*])[*]</chem>          | 0.153  | 3 out of 4             |
| Top Features for negative contribution |             |                                                                                                                                   |        |                        |
| Fingerprint                            | Bit/Smiles  | Feature Structure                                                                                                                 | Score  | Severe in training set |
| SCFP_12                                | 9           | <br><chem>[*]N([*])[*]</chem>                  | -0.315 | 29 out of 66           |
| SCFP_12                                | 399659969   | <br><chem>[*]C([*])N(C=[*])C(=[*])[*]</chem> | -0.298 | 2 out of 5             |
| SCFP_12                                | 1257024795  | <br><chem>[*]NC(=O)C(=[*])[*]</chem>         | -0.248 | 5 out of 11            |

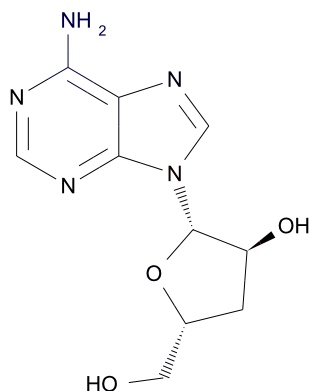
 $C_{10}H_{13}N_5O_3$ 

Molecular Weight: 251.24191

ALogP: -1.308

Rotatable Bonds: 2

Acceptors: 7

Donors: 3

## Model Prediction

Prediction: Moderate

Probability: 0.586

Enrichment: 0.946

Bayesian Score: -2.532

Mahalanobis Distance: 9.549

Mahalanobis Distance p-value: 0.126

Prediction: Positive if the Bayesian score is above the estimated best cutoff value from minimizing the false positive and false negative rate.

Probability: The estimated probability that the sample is in the positive category. This assumes that the Bayesian score follows a normal distribution and is different from the prediction using a cutoff.

Enrichment: An estimate of enrichment, that is, the increased likelihood (versus random) of this sample being in the category.

Bayesian Score: The standard Laplacian-modified Bayesian score.

Mahalanobis Distance: The Mahalanobis distance (MD) is the distance to the center of the training data. The larger the MD, the less trustworthy the prediction.

Mahalanobis Distance p-value: The p-value gives the fraction of training data with an MD greater than or equal to the one for the given sample, assuming normally distributed data. The smaller the p-value, the less trustworthy the prediction. For highly non-normal X properties (e.g., fingerprints), the MD p-value is wildly inaccurate.

## Structural Similar Compounds

| Name               | 1;5-NAPHTHALENEDISULFONIC ACID;2-AMINO- | 1;5-NAPHTHALENEDISULFONIC ACID;3-AMINO- | BENZENE-1;3-DICARBOXYLIC ACID;5-SULFO- |
|--------------------|-----------------------------------------|-----------------------------------------|----------------------------------------|
| Structure          |                                         |                                         |                                        |
| Actual Endpoint    | Moderate                                | Moderate                                | Severe                                 |
| Predicted Endpoint | Moderate                                | Moderate                                | Moderate                               |
| Distance           | 0.752                                   | 0.752                                   | 0.771                                  |
| Reference          | 28ZPAK-;188;72                          | 28ZPAK-;189;72                          | 28ZPAK-;184;72                         |

## Model Applicability

Unknown features are fingerprint features in the query molecule, but not found in the training set.

1. All properties and OPS components are within expected ranges.

## Feature Contribution

### Top features for positive contribution

| Fingerprint | Bit/Smiles | Feature Structure                                                    | Score | Severe in training set |
|-------------|------------|----------------------------------------------------------------------|-------|------------------------|
| SCFP_12     | -443505090 | <br><chem>[*]C([*])n1:[cH]:[*]:</chem><br><chem>[*]:[c]:1:[*]</chem> | 0.218 | 1 out of 1             |

| SCFP_12                                | -1272798659 | 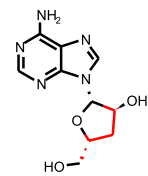<br><chem>[*][C@@H]1[*][*]CC1</chem>                     | 0.139  | 216 out of 309         |
|----------------------------------------|-------------|---------------------------------------------------------------------------------------------------------------------------------------------|--------|------------------------|
| SCFP_12                                | -424515134  | <br><chem>[*]C([*])O</chem>                              | 0.099  | 141 out of 210         |
| Top Features for negative contribution |             |                                                                                                                                             |        |                        |
| Fingerprint                            | Bit/Smiles  | Feature Structure                                                                                                                           | Score  | Severe in training set |
| SCFP_12                                | 384920865   | <br><chem>[*]:[c](:[*])N</chem>                          | -0.968 | 10 out of 46           |
| SCFP_12                                | 10          | <br><chem>[*]N</chem>                                   | -0.451 | 43 out of 112          |
| SCFP_12                                | 112554633   | <br><chem>[*][c](:[*]):[c]1:n:[*]:[*]:[c]:1:[*]</chem> | -0.324 | 5 out of 12            |



AND Enantiomer

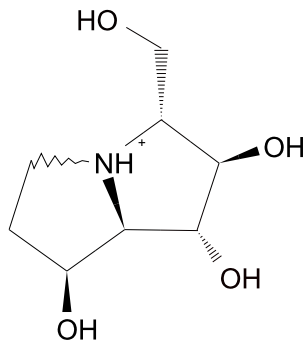 $C_8H_{16}NO_4$ 

Molecular Weight: 190.21693

ALogP: -3.556

Rotatable Bonds: 1

Acceptors: 4

Donors: 5

## Model Prediction

Prediction: Irritant

Probability: 0.976

Enrichment: 1.147

Bayesian Score: 0.277

Mahalanobis Distance: 10.118

Mahalanobis Distance p-value: 0.0704

Prediction: Positive if the Bayesian score is above the estimated best cutoff value from minimizing the false positive and false negative rate.

Probability: The estimated probability that the sample is in the positive category. This assumes that the Bayesian score follows a normal distribution and is different from the prediction using a cutoff.

Enrichment: An estimate of enrichment, that is, the increased likelihood (versus random) of this sample being in the category.

Bayesian Score: The standard Laplacian-modified Bayesian score.

Mahalanobis Distance: The Mahalanobis distance (MD) is the distance to the center of the training data. The larger the MD, the less trustworthy the prediction.

Mahalanobis Distance p-value: The p-value gives the fraction of training data with an MD greater than or equal to the one for the given sample, assuming normally distributed data. The smaller the p-value, the less trustworthy the prediction. For highly non-normal X properties (e.g., fingerprints), the MD p-value is wildly inaccurate.

## Structural Similar Compounds

| Name               | 1;2-Ethanediamine; N-(2-aminoethyl)-N'-(2-((2-aminoethyl)amino)ethyl)- | TRIETHYLENETETRAMIN E | Ethanol; 2;2';2'';2'''-silanetetrayltetrakis-                          |
|--------------------|------------------------------------------------------------------------|-----------------------|------------------------------------------------------------------------|
| Structure          |                                                                        |                       |                                                                        |
| Actual Endpoint    | Irritant                                                               | Irritant              | Non-Irritant                                                           |
| Predicted Endpoint | Irritant                                                               | Irritant              | Non-Irritant                                                           |
| Distance           | 0.755                                                                  | 0.771                 | 0.874                                                                  |
| Reference          | Prehled Prumyslove Toxikologie; Organicke Latky; Marhold; J. -;446;86  | UCDS**12/12/66        | Prehled Prumyslove Toxikologie; Organicke Latky; Marhold; J. -;1232;86 |

## Model Applicability

Unknown features are fingerprint features in the query molecule, but not found in the training set.

1. All properties and OPS components are within expected ranges.
2. Unknown FCFP\_2 feature: 10: [\*][NH+]([\*])[\*]
3. Unknown FCFP\_2 feature: -1853714334: [\*][C@@H]1[\*][\*][C@H]2[\*][\*][C][NH+]12
4. Unknown FCFP\_2 feature: -1817836174: [\*][C@H]1[\*][\*][NH+]2[\*][\*][C@H]([\*])C12
5. Unknown FCFP\_2 feature: 1155241219: [\*][NH+]1[\*][\*][\*]CC1

## Feature Contribution

### Top features for positive contribution

| Fingerprint | Bit/Smiles | Feature Structure | Score | Irritant in training set |
|-------------|------------|-------------------|-------|--------------------------|
|             |            |                   |       |                          |

| FCFP_12                                | 1070061035  | 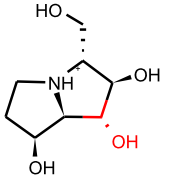<br><chem>[*]C([*])O</chem>            | 0.107 | 338 out of 376           |
|----------------------------------------|-------------|---------------------------------------------------------------------------------------------------------------------------|-------|--------------------------|
| FCFP_12                                | 3           | <br><chem>[*]O</chem>                  | 0.105 | 491 out of 547           |
| FCFP_12                                | -1272709286 | <br><chem>[*]C([*])CO</chem>           | 0.103 | 266 out of 297           |
| Top Features for negative contribution |             |                                                                                                                           |       |                          |
| Fingerprint                            | Bit/Smiles  | Feature Structure                                                                                                         | Score | Irritant in training set |
| FCFP_12                                | 0           | <br><chem>[*]C([*])[*]</chem>         | 0.000 | 1184 out of 1397         |
| FCFP_12                                | -1272798659 | <br><chem>[*][C@@H]1[*][*]CC1</chem> | 0.000 | 517 out of 643           |

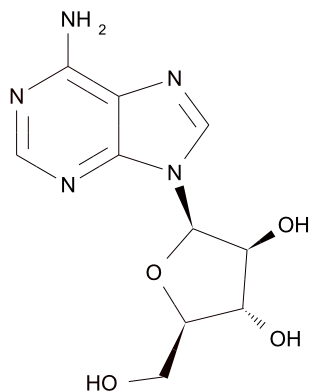
 $C_{10}H_{13}N_5O_4$ 

Molecular Weight: 267.24132

ALogP: -1.881

Rotatable Bonds: 2

Acceptors: 8

Donors: 4

## Model Prediction

**Prediction: Irritant**

Probability: 1.000

Enrichment: 1.176

Bayesian Score: 1.388

Mahalanobis Distance: 9.789

Mahalanobis Distance p-value: 0.15

Prediction: Positive if the Bayesian score is above the estimated best cutoff value from minimizing the false positive and false negative rate.

Probability: The estimated probability that the sample is in the positive category. This assumes that the Bayesian score follows a normal distribution and is different from the prediction using a cutoff.

Enrichment: An estimate of enrichment, that is, the increased likelihood (versus random) of this sample being in the category.

Bayesian Score: The standard Laplacian-modified Bayesian score.

Mahalanobis Distance: The Mahalanobis distance (MD) is the distance to the center of the training data. The larger the MD, the less trustworthy the prediction.

Mahalanobis Distance p-value: The p-value gives the fraction of training data with an MD greater than or equal to the one for the given sample, assuming normally distributed data. The smaller the p-value, the less trustworthy the prediction. For highly non-normal X properties (e.g., fingerprints), the MD p-value is wildly inaccurate.

## Structural Similar Compounds

| Name               | 2:2'-Biphenyldisulfonic acid; 4:4'-diamino-                             | 2:7-Naphthalenedisulfonic acid; 4-amino-5-hydroxy-                      | ANTHRAQUINONE;1;5-DIAMINO-4;8-DIHYDROXY- |
|--------------------|-------------------------------------------------------------------------|-------------------------------------------------------------------------|------------------------------------------|
| Structure          |                                                                         |                                                                         |                                          |
| Actual Endpoint    | Irritant                                                                | Non-Irritant                                                            | Irritant                                 |
| Predicted Endpoint | Irritant                                                                | Non-Irritant                                                            | Irritant                                 |
| Distance           | 0.718                                                                   | 0.729                                                                   | 0.777                                    |
| Reference          | Prehled Prumyslove Toxikologie; Organicke Latky; Marhold; J. pp 1061;86 | Prehled Prumyslove Toxikologie; Organicke Latky; Marhold; J. pp 1058;86 | 28ZPAK-;103;72                           |

## Model Applicability

Unknown features are fingerprint features in the query molecule, but not found in the training set.

1. All properties and OPS components are within expected ranges.
2. Unknown FCFP\_2 feature: -124685461: [\*]:n:c:n:[\*]
3. Unknown FCFP\_2 feature: -1564473960: [\*]n1:[\*]:[\*]:[c](:[\*]):[c]:1:n:[\*]
4. Unknown FCFP\_2 feature: -1151884458: [\*]:n:[c](N):[c](:[\*]):[\*]
5. Unknown FCFP\_2 feature: 1315416442: [\*][C@H]1[\*][\*]O[C@H]1n(:[\*]):[\*]

## Feature Contribution

### Top features for positive contribution

| Fingerprint | Bit/Smiles | Feature Structure | Score | Irritant in training set |
|-------------|------------|-------------------|-------|--------------------------|
|             |            |                   |       |                          |

|                                        |             |                                                                                                                                           |       |                          |
|----------------------------------------|-------------|-------------------------------------------------------------------------------------------------------------------------------------------|-------|--------------------------|
| FCFP_12                                | 1747237384  | 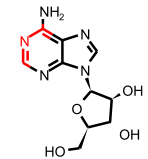<br><chem>[*][c](:[*]):n:[cH]:[*]</chem>               | 0.208 | 44 out of 44             |
| FCFP_12                                | 178336375   | <br><chem>[*][c](:[*]):[c]1:n:[*]:[*]:[c]:1:[*]</chem> | 0.202 | 19 out of 19             |
| FCFP_12                                | 17          | <br><chem>[*]:n:[*]</chem>                             | 0.189 | 48 out of 49             |
| Top Features for negative contribution |             |                                                                                                                                           |       |                          |
| Fingerprint                            | Bit/Smiles  | Feature Structure                                                                                                                         | Score | Irritant in training set |
| FCFP_12                                | -1143715940 | <br><chem>[*][C@@H]1[*][*][C@H]([*])O1</chem>         | 0.000 | 454 out of 590           |
| FCFP_12                                | 1069584379  | <br><chem>[*]:[c](:[*])N</chem>                      | 0.000 | 85 out of 101            |
|                                        |             |                                                                                                                                           |       |                          |

|         |   |                                                                                                                                                                 |       |                 |
|---------|---|-----------------------------------------------------------------------------------------------------------------------------------------------------------------|-------|-----------------|
| FCFP_12 | 1 | 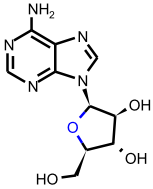<br><chem>Nc1ncnc2c1n(c2)[C@@H]3O[C@H](CO)[C@@H](O)[C@H]3O</chem><br>[*]O[*] | 0.000 | 872 out of 1051 |
|---------|---|-----------------------------------------------------------------------------------------------------------------------------------------------------------------|-------|-----------------|

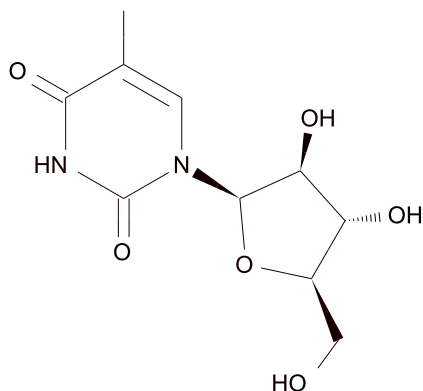
 $C_{10}H_{14}N_2O_6$ 

Molecular Weight: 258.22795

ALogP: -2.005

Rotatable Bonds: 2

Acceptors: 6

Donors: 4

## Model Prediction

**Prediction: Irritant**

Probability: 1.000

Enrichment: 1.176

Bayesian Score: 1.530

Mahalanobis Distance: 13.987

Mahalanobis Distance p-value: 2.54e-010

Prediction: Positive if the Bayesian score is above the estimated best cutoff value from minimizing the false positive and false negative rate.

Probability: The estimated probability that the sample is in the positive category. This assumes that the Bayesian score follows a normal distribution and is different from the prediction using a cutoff.

Enrichment: An estimate of enrichment, that is, the increased likelihood (versus random) of this sample being in the category.

Bayesian Score: The standard Laplacian-modified Bayesian score.

Mahalanobis Distance: The Mahalanobis distance (MD) is the distance to the center of the training data. The larger the MD, the less trustworthy the prediction.

Mahalanobis Distance p-value: The p-value gives the fraction of training data with an MD greater than or equal to the one for the given sample, assuming normally distributed data. The smaller the p-value, the less trustworthy the prediction. For highly non-normal X properties (e.g., fingerprints), the MD p-value is wildly inaccurate.

## Structural Similar Compounds

| Name               | ANTHRAQUINONE;1;5-DIAMINO-4;8-DIHYDROXY- | ANTHRAQUINONE; 1;8-DIAMINO-4;5-DIHYDROXY- | TRIETHYLENETETRAMINE |
|--------------------|------------------------------------------|-------------------------------------------|----------------------|
| Structure          |                                          |                                           |                      |
| Actual Endpoint    | Irritant                                 | Irritant                                  | Irritant             |
| Predicted Endpoint | Irritant                                 | Irritant                                  | Irritant             |
| Distance           | 0.733                                    | 0.733                                     | 0.765                |
| Reference          | 28ZPAK-;103;72                           | 28ZPAK-;103;72                            | UCDS**12/12/66       |

## Model Applicability

Unknown features are fingerprint features in the query molecule, but not found in the training set.

1. All properties and OPS components are within expected ranges.

## Feature Contribution

### Top features for positive contribution

| Fingerprint | Bit/Smiles  | Feature Structure         | Score | Irritant in training set |
|-------------|-------------|---------------------------|-------|--------------------------|
| FCFP_12     | -2091721556 | <br>[*]C@H]1[*]O[C@@H]1CO | 0.187 | 8 out of 8               |

|                                        |             |                                                                                                                                  |       |                          |
|----------------------------------------|-------------|----------------------------------------------------------------------------------------------------------------------------------|-------|--------------------------|
| FCFP_12                                | -885550502  | 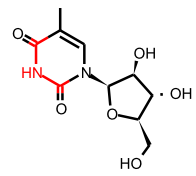<br><chem>[*]C(=[*])NC(=[*])[*]</chem>        | 0.180 | 64 out of 66             |
| FCFP_12                                | -1986098826 | <br><chem>[*]NC(=O)N([*])[*]</chem>           | 0.175 | 5 out of 5               |
| Top Features for negative contribution |             |                                                                                                                                  |       |                          |
| Fingerprint                            | Bit/Smiles  | Feature Structure                                                                                                                | Score | Irritant in training set |
| FCFP_12                                | 0           | <br><chem>[*]C([*])[*]</chem>                 | 0.000 | 1184 out of 1397         |
| FCFP_12                                | -1143715940 | <br><chem>[*][C@@H]1[*][*][C@H](1*)O1</chem> | 0.000 | 454 out of 590           |
| FCFP_12                                | 1872154524  | <br><chem>[*]C(=O)[*]</chem>                | 0.000 | 563 out of 690           |

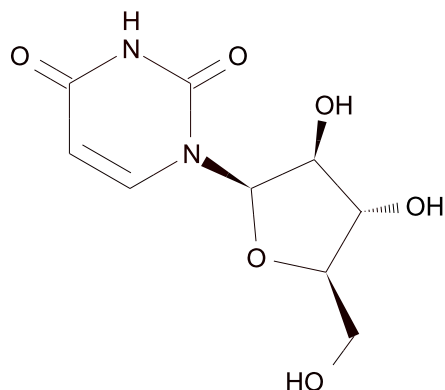

$C_9H_{12}N_2O_6$

Molecular Weight: 244.20137

ALogP: -2.451

Rotatable Bonds: 2

Acceptors: 6

Donors: 4

## Model Prediction

**Prediction: Irritant**

Probability: 1.000

Enrichment: 1.176

Bayesian Score: 1.631

Mahalanobis Distance: 12.548

Mahalanobis Distance p-value: 3.04e-006

Prediction: Positive if the Bayesian score is above the estimated best cutoff value from minimizing the false positive and false negative rate.

Probability: The estimated probability that the sample is in the positive category. This assumes that the Bayesian score follows a normal distribution and is different from the prediction using a cutoff.

Enrichment: An estimate of enrichment, that is, the increased likelihood (versus random) of this sample being in the category.

Bayesian Score: The standard Laplacian-modified Bayesian score.

Mahalanobis Distance: The Mahalanobis distance (MD) is the distance to the center of the training data. The larger the MD, the less trustworthy the prediction.

Mahalanobis Distance p-value: The p-value gives the fraction of training data with an MD greater than or equal to the one for the given sample, assuming normally distributed data. The smaller the p-value, the less trustworthy the prediction. For highly non-normal X properties (e.g., fingerprints), the MD p-value is wildly inaccurate.

## Structural Similar Compounds

| Name               | ANTHRAQUINONE;1;5-DIAMINO-4;8-DIHYDROXY- | ANTHRAQUINONE; 1;8-DIAMINO-4;5-DIHYDROXY- | TRIETHYLENETETRAMINE |
|--------------------|------------------------------------------|-------------------------------------------|----------------------|
| Structure          |                                          |                                           |                      |
| Actual Endpoint    | Irritant                                 | Irritant                                  | Irritant             |
| Predicted Endpoint | Irritant                                 | Irritant                                  | Irritant             |
| Distance           | 0.772                                    | 0.773                                     | 0.781                |
| Reference          | 28ZPAK-;103;72                           | 28ZPAK-;103;72                            | UCDS**12/12/66       |

## Model Applicability

Unknown features are fingerprint features in the query molecule, but not found in the training set.

1. All properties and OPS components are within expected ranges.

## Feature Contribution

### Top features for positive contribution

| Fingerprint | Bit/Smiles  | Feature Structure        | Score | Irritant in training set |
|-------------|-------------|--------------------------|-------|--------------------------|
| FCFP_12     | -2091721556 | <br>[*]C@H1[*]O[C@@H]1CO | 0.187 | 8 out of 8               |



|                                        |             |                                                                                                                                   |       |                          |
|----------------------------------------|-------------|-----------------------------------------------------------------------------------------------------------------------------------|-------|--------------------------|
| FCFP_12                                | -885550502  | 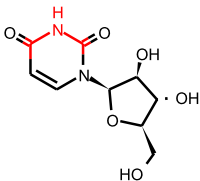<br><chem>[*]C(=[*])NC(=[*])[*]</chem>         | 0.180 | 64 out of 66             |
| FCFP_12                                | -1986098826 | <br><chem>[*]NC(=O)N([*])[*]</chem>            | 0.175 | 5 out of 5               |
| Top Features for negative contribution |             |                                                                                                                                   |       |                          |
| Fingerprint                            | Bit/Smiles  | Feature Structure                                                                                                                 | Score | Irritant in training set |
| FCFP_12                                | 1           | <br><chem>[*]O[*]</chem>                       | 0.000 | 872 out of 1051          |
| FCFP_12                                | 0           | <br><chem>[*]C([*])[*]</chem>                 | 0.000 | 1184 out of 1397         |
| FCFP_12                                | -1143715940 | <br><chem>[*][C@@H]1[*][*][C@H](1*)O1</chem> | 0.000 | 454 out of 590           |

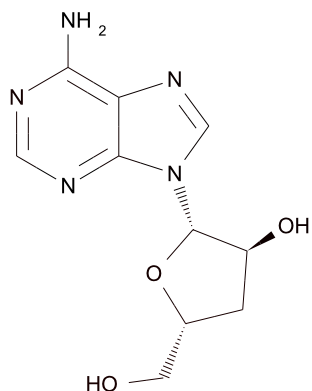
 $C_{10}H_{13}N_5O_3$ 

Molecular Weight: 251.24191

ALogP: -1.308

Rotatable Bonds: 2

Acceptors: 7

Donors: 3

## Model Prediction

**Prediction: Irritant**

Probability: 1.000

Enrichment: 1.176

Bayesian Score: 1.663

Mahalanobis Distance: 9.406

Mahalanobis Distance p-value: 0.3

Prediction: Positive if the Bayesian score is above the estimated best cutoff value from minimizing the false positive and false negative rate.

Probability: The estimated probability that the sample is in the positive category. This assumes that the Bayesian score follows a normal distribution and is different from the prediction using a cutoff.

Enrichment: An estimate of enrichment, that is, the increased likelihood (versus random) of this sample being in the category. Bayesian Score: The standard Laplacian-modified Bayesian score.

Mahalanobis Distance: The Mahalanobis distance (MD) is the distance to the center of the training data. The larger the MD, the less trustworthy the prediction.

Mahalanobis Distance p-value: The p-value gives the fraction of training data with an MD greater than or equal to the one for the given sample, assuming normally distributed data. The smaller the p-value, the less trustworthy the prediction. For highly non-normal X properties (e.g., fingerprints), the MD p-value is wildly inaccurate.

## Structural Similar Compounds

| Name               | 2-NAPHTHALENESULFONIC ACID; 6-AMINO-5-SULFOMETHYL- | HC Red #3                            | 1;5-NAPHTHALENEDISULFONIC ACID;2-AMINO- |
|--------------------|----------------------------------------------------|--------------------------------------|-----------------------------------------|
| Structure          |                                                    |                                      |                                         |
| Actual Endpoint    | Irritant                                           | Non-Irritant                         | Irritant                                |
| Predicted Endpoint | Irritant                                           | Non-Irritant                         | Irritant                                |
| Distance           | 0.695                                              | 0.705                                | 0.710                                   |
| Reference          | 28ZPAK 190;72                                      | J. Am. Coll. Toxicol. 11(4):509;1992 | 28ZPAK-;188;72                          |

## Model Applicability

Unknown features are fingerprint features in the query molecule, but not found in the training set.

1. All properties and OPS components are within expected ranges.
2. Unknown FCFP\_2 feature: -124685461: [\*]:n:c:n:[\*]
3. Unknown FCFP\_2 feature: -1564473960: [\*]n1:[\*]:[\*]:[c]([\*]):[c]:1:n:[\*]
4. Unknown FCFP\_2 feature: -1151884458: [\*]:n:[c](N):[c]([\*]):[\*]
5. Unknown FCFP\_2 feature: 1315416442: [\*][C@H]1[\*][\*]O[C@H]1n([\*]):[\*]

## Feature Contribution

| Top features for positive contribution |            |                                         |       |                          |
|----------------------------------------|------------|-----------------------------------------|-------|--------------------------|
| Fingerprint                            | Bit/Smiles | Feature Structure                       | Score | Irritant in training set |
| FCFP_12                                | 1747237384 | <br><chem>[*][c]([*]):n:[cH]:[*]</chem> | 0.208 | 44 out of 44             |

|                                        |            |                                                                                                                                           |       |                          |
|----------------------------------------|------------|-------------------------------------------------------------------------------------------------------------------------------------------|-------|--------------------------|
| FCFP_12                                | 178336375  | 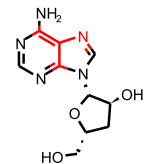<br><chem>[*][c](:[*]):[c]1:n:[*]:[*]:[c]:1:[*]</chem> | 0.202 | 19 out of 19             |
| FCFP_12                                | 17         | <br><chem>[*]:n:[*]</chem>                             | 0.189 | 48 out of 49             |
| Top Features for negative contribution |            |                                                                                                                                           |       |                          |
| Fingerprint                            | Bit/Smiles | Feature Structure                                                                                                                         | Score | Irritant in training set |
| FCFP_12                                | 1069584379 | <br><chem>[*]:[c](:[*])N</chem>                        | 0.000 | 85 out of 101            |
| FCFP_12                                | 0          | <br><chem>[*]C([*])[*]</chem>                         | 0.000 | 1184 out of 1397         |
| FCFP_12                                | 1          | <br><chem>[*]O[*]</chem>                             | 0.000 | 872 out of 1051          |

# Ribavirin

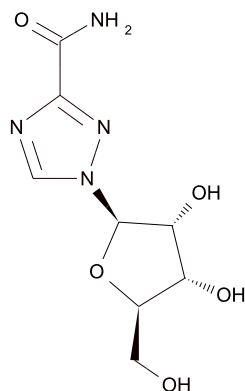

$C_8H_{12}N_4O_5$

Molecular Weight: 244.20467

ALogP: -2.745

Rotatable Bonds: 3

Acceptors: 7

Donors: 4

## Model Prediction

**Prediction: Irritant**

Probability: 1.000

Enrichment: 1.176

Bayesian Score: 1.535

Mahalanobis Distance: 9.704

Mahalanobis Distance p-value: 0.177

Prediction: Positive if the Bayesian score is above the estimated best cutoff value from minimizing the false positive and false negative rate.

Probability: The estimated probability that the sample is in the positive category. This assumes that the Bayesian score follows a normal distribution and is different from the prediction using a cutoff.

Enrichment: An estimate of enrichment, that is, the increased likelihood (versus random) of this sample being in the category.

Bayesian Score: The standard Laplacian-modified Bayesian score.

Mahalanobis Distance: The Mahalanobis distance (MD) is the distance to the center of the training data. The larger the MD, the less trustworthy the prediction.

Mahalanobis Distance p-value: The p-value gives the fraction of training data with an MD greater than or equal to the one for the given sample, assuming normally distributed data. The smaller the p-value, the less trustworthy the prediction. For highly non-normal X properties (e.g., fingerprints), the MD p-value is wildly inaccurate.

# TOPKAT\_Ocular\_Irritancy\_None\_vs\_Irritant

## Structural Similar Compounds

| Name               | 2;7-Naphthalenedisulfonic acid; 4-amino-5-hydroxy-                      | P-BENZENEDISULFONIC ACID;2-AMINO- | 2;2'-Biphenyldisulfonic acid; 4;4'-diamino-                             |
|--------------------|-------------------------------------------------------------------------|-----------------------------------|-------------------------------------------------------------------------|
| Structure          |                                                                         |                                   |                                                                         |
| Actual Endpoint    | Non-Irritant                                                            | Irritant                          | Irritant                                                                |
| Predicted Endpoint | Non-Irritant                                                            | Irritant                          | Irritant                                                                |
| Distance           | 0.786                                                                   | 0.799                             | 0.801                                                                   |
| Reference          | Prehled Prumyslove Toxikologie; Organické Latky; Marhold; J. pp 1058;86 | 28ZPAK-;182;72                    | Prehled Prumyslove Toxikologie; Organické Latky; Marhold; J. pp 1061;86 |

## Model Applicability

Unknown features are fingerprint features in the query molecule, but not found in the training set.

1. All properties and OPS components are within expected ranges.
2. Unknown FCFP\_2 feature: -2049666792: [\*]C([\*])n1:n:[\*]:[\*]:c:1
3. Unknown FCFP\_2 feature: -124685461: [\*]:n:c:n:[\*]
4. Unknown FCFP\_2 feature: 1315416442: [\*][C@H]1[\*][\*]O[C@H]1n(:[\*]):[\*]

## Feature Contribution

| Top features for positive contribution |            |                                 |       |                          |
|----------------------------------------|------------|---------------------------------|-------|--------------------------|
| Fingerprint                            | Bit/Smiles | Feature Structure               | Score | Irritant in training set |
| FCFP_12                                | 1747237384 | <p>[*][c](:[*]):n:[cH]:[*]]</p> | 0.208 | 44 out of 44             |

|                                        |             |                                                                                                                                |       |                          |
|----------------------------------------|-------------|--------------------------------------------------------------------------------------------------------------------------------|-------|--------------------------|
| FCFP_12                                | 17          | 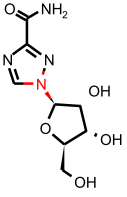<br><chem>[*]:n:[*]</chem>                  | 0.189 | 48 out of 49             |
| FCFP_12                                | -2091721556 | <br><chem>[*][C@@H]1[*][*]O[C@@H]1CO</chem> | 0.187 | 8 out of 8               |
| Top Features for negative contribution |             |                                                                                                                                |       |                          |
| Fingerprint                            | Bit/Smiles  | Feature Structure                                                                                                              | Score | Irritant in training set |
| FCFP_12                                | -1143715940 | <br><chem>[*][C@@H]1[*][*][C@H]1O</chem>    | 0.000 | 454 out of 590           |
| FCFP_12                                | 1872154524  | <br><chem>[*]C(=O)[*]</chem>               | 0.000 | 563 out of 690           |
| FCFP_12                                | 1           | <br><chem>[*]O[*]</chem>                  | 0.000 | 872 out of 1051          |

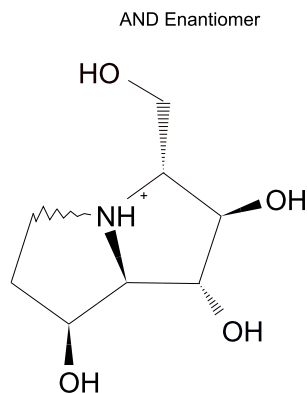

$C_8H_{16}NO_4$   
 Molecular Weight: 190.21693  
 ALogP: -3.556  
 Rotatable Bonds: 1  
 Acceptors: 4  
 Donors: 5

## Model Prediction

Prediction: Carcinogen

Probability: 0.291

Enrichment: 0.904

Bayesian Score: -0.382

Mahalanobis Distance: 8.675

Mahalanobis Distance p-value: 0.909

Prediction: Positive if the Bayesian score is above the estimated best cutoff value from minimizing the false positive and false negative rate.

Probability: The estimated probability that the sample is in the positive category. This assumes that the Bayesian score follows a normal distribution and is different from the prediction using a cutoff.

Enrichment: An estimate of enrichment, that is, the increased likelihood (versus random) of this sample being in the category.

Bayesian Score: The standard Laplacian-modified Bayesian score.

Mahalanobis Distance: The Mahalanobis distance (MD) is the distance to the center of the training data. The larger the MD, the less trustworthy the prediction.

Mahalanobis Distance p-value: The p-value gives the fraction of training data with an MD greater than or equal to the one for the given sample, assuming normally distributed data. The smaller the p-value, the less trustworthy the prediction. For highly non-normal X properties (e.g., fingerprints), the MD p-value is wildly inaccurate.

## Structural Similar Compounds

| Name               | Methyldopa                                                          | Ribavirin                                                           | Ascorbic acid                                                       |
|--------------------|---------------------------------------------------------------------|---------------------------------------------------------------------|---------------------------------------------------------------------|
| Structure          |                                                                     |                                                                     |                                                                     |
| Actual Endpoint    | Non-Carcinogen                                                      | Carcinogen                                                          | Non-Carcinogen                                                      |
| Predicted Endpoint | Non-Carcinogen                                                      | Carcinogen                                                          | Non-Carcinogen                                                      |
| Distance           | 0.755                                                               | 0.845                                                               | 0.855                                                               |
| Reference          | US FDA (Centre for Drug Eval.& Res./Off. Testing & Res.) Sept. 1997 | US FDA (Centre for Drug Eval.& Res./Off. Testing & Res.) Sept. 1997 | US FDA (Centre for Drug Eval.& Res./Off. Testing & Res.) Sept. 1997 |

## Model Applicability

Unknown features are fingerprint features in the query molecule, but not found in the training set.

1. All properties and OPS components are within expected ranges.
2. Unknown ECFP\_2 feature: 1976330679: [\*][NH+]([\*])[\*]
3. Unknown ECFP\_2 feature: -1693770146: [\*][C@H]1[\*][\*][C@H]2[\*][\*][C[NH+]]12
4. Unknown ECFP\_2 feature: -1395316370: [\*][C@H]1[\*][\*][NH+][2][\*][\*][C@H]([\*])C12
5. Unknown ECFP\_2 feature: -705668329: [\*][C][C@H]1[C@H]([\*])[\*][\*][NH+][1][\*]
6. Unknown ECFP\_2 feature: -244159614: [\*][NH+][1][\*][\*]CC1

## Feature Contribution

### Top features for positive contribution

| Fingerprint | Bit/Smiles | Feature Structure              | Score | Carcinogen in training set |
|-------------|------------|--------------------------------|-------|----------------------------|
| ECFP_12     | -85480422  | <br><chem>[*][C]([*])CO</chem> | 0.330 | 3 out of 6                 |

| ECFP_12                                | -1331450522 | 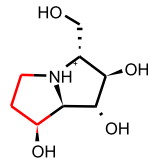<br><chem>[*][C@@H]1[*][*]CC1</chem>             | 0.097  | 28 out of 81               |
|----------------------------------------|-------------|-------------------------------------------------------------------------------------------------------------------------------------|--------|----------------------------|
| ECFP_12                                | -329826665  | <br><chem>[*][C@@H]1[*][*]C[C@@H]1O</chem>       | 0.051  | 4 out of 12                |
| Top Features for negative contribution |             |                                                                                                                                     |        |                            |
| Fingerprint                            | Bit/Smiles  | Feature Structure                                                                                                                   | Score  | Carcinogen in training set |
| ECFP_12                                | 305695353   | <br><chem>[*][C@@H]1[*][*][C@H]([*])C@H1O</chem> | -0.154 | 2 out of 8                 |
| ECFP_12                                | 1559650422  | <br><chem>[*]C[*]</chem>                        | -0.112 | 63 out of 226              |
| ECFP_12                                | -1884411803 | <br><chem>[*]O</chem>                          | -0.106 | 55 out of 196              |

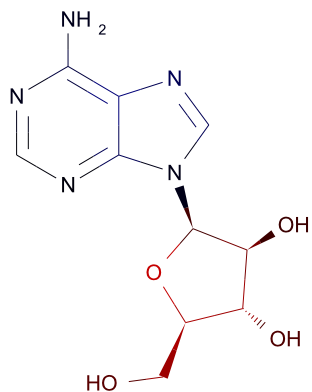

$C_{10}H_{13}N_5O_4$

Molecular Weight: 267.24132

ALogP: -1.881

Rotatable Bonds: 2

Acceptors: 8

Donors: 4

## Model Prediction

**Prediction: Carcinogen**

Probability: 0.345

Enrichment: 1.072

Bayesian Score: 2.069

Mahalanobis Distance: 9.415

Mahalanobis Distance p-value: 0.649

Prediction: Positive if the Bayesian score is above the estimated best cutoff value from minimizing the false positive and false negative rate.

Probability: The estimated probability that the sample is in the positive category. This assumes that the Bayesian score follows a normal distribution and is different from the prediction using a cutoff.

Enrichment: An estimate of enrichment, that is, the increased likelihood (versus random) of this sample being in the category.

Bayesian Score: The standard Laplacian-modified Bayesian score.

Mahalanobis Distance: The Mahalanobis distance (MD) is the distance to the center of the training data. The larger the MD, the less trustworthy the prediction.

Mahalanobis Distance p-value: The p-value gives the fraction of training data with an MD greater than or equal to the one for the given sample, assuming normally distributed data. The smaller the p-value, the less trustworthy the prediction. For highly non-normal X properties (e.g., fingerprints), the MD p-value is wildly inaccurate.

## Structural Similar Compounds

| Name               | Ribavirin                                                           | Streptozocin                                                        | Acyclovir                                                           |
|--------------------|---------------------------------------------------------------------|---------------------------------------------------------------------|---------------------------------------------------------------------|
| Structure          |                                                                     |                                                                     |                                                                     |
| Actual Endpoint    | Carcinogen                                                          | Carcinogen                                                          | Non-Carcinogen                                                      |
| Predicted Endpoint | Carcinogen                                                          | Carcinogen                                                          | Non-Carcinogen                                                      |
| Distance           | 0.526                                                               | 0.603                                                               | 0.684                                                               |
| Reference          | US FDA (Centre for Drug Eval.& Res./Off. Testing & Res.) Sept. 1997 | US FDA (Centre for Drug Eval.& Res./Off. Testing & Res.) Sept. 1997 | US FDA (Centre for Drug Eval.& Res./Off. Testing & Res.) Sept. 1997 |

## Model Applicability

Unknown features are fingerprint features in the query molecule, but not found in the training set.

1. All properties and OPS components are within expected ranges.

## Feature Contribution

### Top features for positive contribution

| Fingerprint | Bit/Smiles | Feature Structure              | Score | Carcinogen in training set |
|-------------|------------|--------------------------------|-------|----------------------------|
| ECFP_12     | -553149446 | <br>[*]C[C@H]1O[*]1[*]C@@H1[*] | 0.575 | 3 out of 4                 |



| ECFP_12                                | 370123836   | 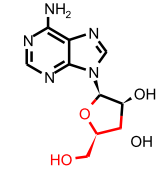<br><chem>[*][C@@H]1[*][*]O[C@@H]1CO</chem>                       | 0.575  | 3 out of 4                 |
|----------------------------------------|-------------|------------------------------------------------------------------------------------------------------------------------------------------------------|--------|----------------------------|
| ECFP_12                                | -763075316  | <br><chem>[*][C@@H]1O[C@H](CO)[C@@H](O)[C@@H](O)[C@@H]1[*]</chem> | 0.437  | 2 out of 3                 |
| Top Features for negative contribution |             |                                                                                                                                                      |        |                            |
| Fingerprint                            | Bit/Smiles  | Feature Structure                                                                                                                                    | Score  | Carcinogen in training set |
| ECFP_12                                | -1734834311 | <br><chem>[*]:n:[c](N):[c](:[*]):[*]</chem>                       | -0.560 | 1 out of 8                 |
| ECFP_12                                | 615197788   | <br><chem>[*]n1:[cH]:n:[c](:[c]([*]):[*]):[c]:1:[*]</chem>       | -0.485 | 0 out of 2                 |
| ECFP_12                                | -1219098860 | <br><chem>[*]C([*])n1:[cH]:[*]:[*]:[c]:1:[*]</chem>             | -0.272 | 0 out of 1                 |

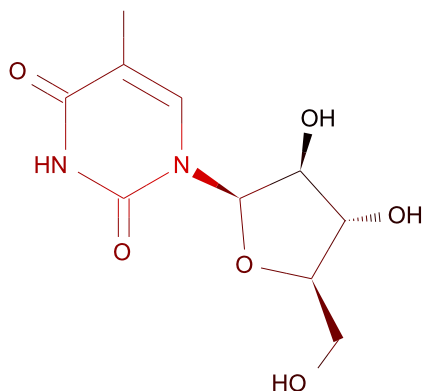

$C_{10}H_{14}N_2O_6$

Molecular Weight: 258.22795

ALogP: -2.005

Rotatable Bonds: 2

Acceptors: 6

Donors: 4

## Model Prediction

**Prediction: Carcinogen**

Probability: 0.467

Enrichment: 1.451

Bayesian Score: 6.219

Mahalanobis Distance: 9.201

Mahalanobis Distance p-value: 0.743

Prediction: Positive if the Bayesian score is above the estimated best cutoff value from minimizing the false positive and false negative rate.

Probability: The estimated probability that the sample is in the positive category. This assumes that the Bayesian score follows a normal distribution and is different from the prediction using a cutoff.

Enrichment: An estimate of enrichment, that is, the increased likelihood (versus random) of this sample being in the category.

Bayesian Score: The standard Laplacian-modified Bayesian score.

Mahalanobis Distance: The Mahalanobis distance (MD) is the distance to the center of the training data. The larger the MD, the less trustworthy the prediction.

Mahalanobis Distance p-value: The p-value gives the fraction of training data with an MD greater than or equal to the one for the given sample, assuming normally distributed data. The smaller the p-value, the less trustworthy the prediction. For highly non-normal X properties (e.g., fingerprints), the MD p-value is wildly inaccurate.

## Structural Similar Compounds

| Name               | Zidovudine                                                          | Methyldopa                                                          | Ribavirin                                                           |
|--------------------|---------------------------------------------------------------------|---------------------------------------------------------------------|---------------------------------------------------------------------|
| Structure          |                                                                     |                                                                     |                                                                     |
| Actual Endpoint    | Carcinogen                                                          | Non-Carcinogen                                                      | Carcinogen                                                          |
| Predicted Endpoint | Carcinogen                                                          | Non-Carcinogen                                                      | Carcinogen                                                          |
| Distance           | 0.566                                                               | 0.605                                                               | 0.617                                                               |
| Reference          | US FDA (Centre for Drug Eval.& Res./Off. Testing & Res.) Sept. 1997 | US FDA (Centre for Drug Eval.& Res./Off. Testing & Res.) Sept. 1997 | US FDA (Centre for Drug Eval.& Res./Off. Testing & Res.) Sept. 1997 |

## Model Applicability

Unknown features are fingerprint features in the query molecule, but not found in the training set.

1. All properties and OPS components are within expected ranges.
2. Unknown ECFP\_2 feature: -627157165: [\*][C@H]1[\*][\*]O[C@H]1N([\*])[\*]

## Feature Contribution

### Top features for positive contribution

| Fingerprint | Bit/Smiles | Feature Structure                   | Score | Carcinogen in training set |
|-------------|------------|-------------------------------------|-------|----------------------------|
| ECFP_12     | 1526392165 | <br><chem>[*]NC(=O)N([*])[*]</chem> | 0.851 | 5 out of 5                 |

| ECFP_12                                | 370123836  | 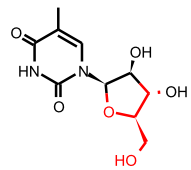<br><chem>[*][C@H]1[*][*]O[C@@H]1CO</chem>    | 0.575  | 3 out of 4                 |
|----------------------------------------|------------|---------------------------------------------------------------------------------------------------------------------------------|--------|----------------------------|
| ECFP_12                                | -553149446 | <br><chem>[*]C[C@H]1O[*][*][C@@H]1[*]</chem> | 0.575  | 3 out of 4                 |
| Top Features for negative contribution |            |                                                                                                                                 |        |                            |
| Fingerprint                            | Bit/Smiles | Feature Structure                                                                                                               | Score  | Carcinogen in training set |
| ECFP_12                                | -3067141   | <br><chem>[*]C=C(C)C(=[*])[*]</chem>         | -0.248 | 1 out of 5                 |
| ECFP_12                                | -154530762 | <br><chem>[*]N[*]</chem>                    | -0.203 | 9 out of 36                |
| ECFP_12                                | 305695353  | <br><chem>[*][C@@H]1[*][*][C@H]1O</chem>   | -0.154 | 2 out of 8                 |

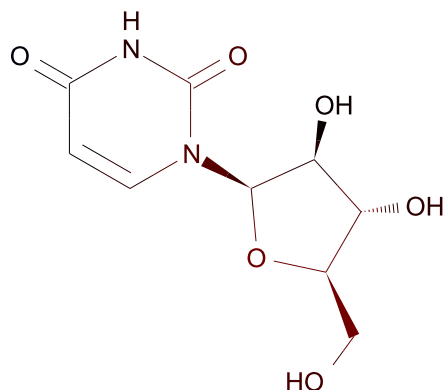

$C_9H_{12}N_2O_6$

Molecular Weight: 244.20137

ALogP: -2.451

Rotatable Bonds: 2

Acceptors: 6

Donors: 4

## Model Prediction

Prediction: Carcinogen

Probability: 0.410

Enrichment: 1.274

Bayesian Score: 4.440

Mahalanobis Distance: 8.233

Mahalanobis Distance p-value: 0.973

Prediction: Positive if the Bayesian score is above the estimated best cutoff value from minimizing the false positive and false negative rate.

Probability: The estimated probability that the sample is in the positive category. This assumes that the Bayesian score follows a normal distribution and is different from the prediction using a cutoff.

Enrichment: An estimate of enrichment, that is, the increased likelihood (versus random) of this sample being in the category.

Bayesian Score: The standard Laplacian-modified Bayesian score.

Mahalanobis Distance: The Mahalanobis distance (MD) is the distance to the center of the training data. The larger the MD, the less trustworthy the prediction.

Mahalanobis Distance p-value: The p-value gives the fraction of training data with an MD greater than or equal to the one for the given sample, assuming normally distributed data. The smaller the p-value, the less trustworthy the prediction. For highly non-normal X properties (e.g., fingerprints), the MD p-value is wildly inaccurate.

## Structural Similar Compounds

| Name               | Ribavirin                                                           | Methyldopa                                                          | Ascorbic acid                                                       |
|--------------------|---------------------------------------------------------------------|---------------------------------------------------------------------|---------------------------------------------------------------------|
| Structure          |                                                                     |                                                                     |                                                                     |
| Actual Endpoint    | Carcinogen                                                          | Non-Carcinogen                                                      | Non-Carcinogen                                                      |
| Predicted Endpoint | Carcinogen                                                          | Non-Carcinogen                                                      | Non-Carcinogen                                                      |
| Distance           | 0.557                                                               | 0.633                                                               | 0.664                                                               |
| Reference          | US FDA (Centre for Drug Eval.& Res./Off. Testing & Res.) Sept. 1997 | US FDA (Centre for Drug Eval.& Res./Off. Testing & Res.) Sept. 1997 | US FDA (Centre for Drug Eval.& Res./Off. Testing & Res.) Sept. 1997 |

## Model Applicability

Unknown features are fingerprint features in the query molecule, but not found in the training set.

1. All properties and OPS components are within expected ranges.
2. Unknown ECFP\_2 feature: -627157165: [\*][C@H]1[\*][\*]O[C@H]1N([\*])([\*])

## Feature Contribution

### Top features for positive contribution

| Fingerprint | Bit/Smiles | Feature Structure                     | Score | Carcinogen in training set |
|-------------|------------|---------------------------------------|-------|----------------------------|
| ECFP_12     | 1526392165 | <br><chem>[*]NC(=O)N([*])([*])</chem> | 0.851 | 5 out of 5                 |

|                                        |            |                                                                                                                                        |        |                            |
|----------------------------------------|------------|----------------------------------------------------------------------------------------------------------------------------------------|--------|----------------------------|
| ECFP_12                                | -553149446 | 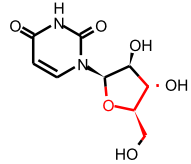<br><chem>[*]C[C@H]1O[*]C[C@@H]1O</chem>            | 0.575  | 3 out of 4                 |
| ECFP_12                                | 370123836  | <br><chem>[*]C[C@H]1[*]O[C@@H]1CO</chem>            | 0.575  | 3 out of 4                 |
| Top Features for negative contribution |            |                                                                                                                                        |        |                            |
| Fingerprint                            | Bit/Smiles | Feature Structure                                                                                                                      | Score  | Carcinogen in training set |
| ECFP_12                                | -867415197 | <br><chem>[*]NC(=O)C=[*]</chem>                     | -0.272 | 0 out of 1                 |
| ECFP_12                                | -154530762 | <br><chem>[*]N[*]</chem>                           | -0.203 | 9 out of 36                |
| ECFP_12                                | 305695353  | <br><chem>[*]C[C@H]1[*]C[C@H]([*])C[C@H]1O</chem> | -0.154 | 2 out of 8                 |

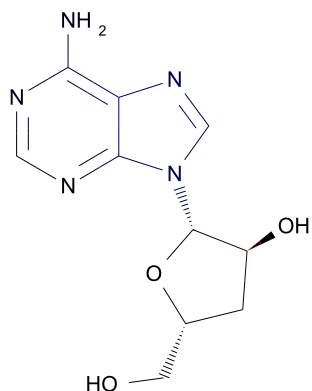

C<sub>10</sub>H<sub>13</sub>N<sub>5</sub>O<sub>3</sub>

Molecular Weight: 251.24191

ALogP: -1.308

Rotatable Bonds: 2

Acceptors: 7

Donors: 3

## Model Prediction

Prediction: Non-Carcinogen

Probability: 0.256

Enrichment: 0.796

Bayesian Score: -2.359

Mahalanobis Distance: 9.986

Mahalanobis Distance p-value: 0.375

Prediction: Positive if the Bayesian score is above the estimated best cutoff value from minimizing the false positive and false negative rate.

Probability: The estimated probability that the sample is in the positive category. This assumes that the Bayesian score follows a normal distribution and is different from the prediction using a cutoff.

Enrichment: An estimate of enrichment, that is, the increased likelihood (versus random) of this sample being in the category.

Bayesian Score: The standard Laplacian-modified Bayesian score.

Mahalanobis Distance: The Mahalanobis distance (MD) is the distance to the center of the training data. The larger the MD, the less trustworthy the prediction.

Mahalanobis Distance p-value: The p-value gives the fraction of training data with an MD greater than or equal to the one for the given sample, assuming normally distributed data. The smaller the p-value, the less trustworthy the prediction. For highly non-normal X properties (e.g., fingerprints), the MD p-value is wildly inaccurate.

## Structural Similar Compounds

| Name               | Acyclovir                                                           | Didanosine                                                          | Zidovudine                                                          |
|--------------------|---------------------------------------------------------------------|---------------------------------------------------------------------|---------------------------------------------------------------------|
| Structure          |                                                                     |                                                                     |                                                                     |
| Actual Endpoint    | Non-Carcinogen                                                      | Non-Carcinogen                                                      | Carcinogen                                                          |
| Predicted Endpoint | Non-Carcinogen                                                      | Non-Carcinogen                                                      | Carcinogen                                                          |
| Distance           | 0.580                                                               | 0.595                                                               | 0.617                                                               |
| Reference          | US FDA (Centre for Drug Eval.& Res./Off. Testing & Res.) Sept. 1997 | US FDA (Centre for Drug Eval.& Res./Off. Testing & Res.) Sept. 1997 | US FDA (Centre for Drug Eval.& Res./Off. Testing & Res.) Sept. 1997 |

## Model Applicability

Unknown features are fingerprint features in the query molecule, but not found in the training set.

1. All properties and OPS components are within expected ranges.

## Feature Contribution

### Top features for positive contribution

| Fingerprint | Bit/Smiles  | Feature Structure                        | Score | Carcinogen in training set |
|-------------|-------------|------------------------------------------|-------|----------------------------|
| ECFP_12     | -1448786963 | <br>[*][c]1:[*]:[c](:[*])<br>:n:[cH]:n:1 | 0.437 | 2 out of 3                 |

|                                        |             |                                                                                                                                                |        |                            |
|----------------------------------------|-------------|------------------------------------------------------------------------------------------------------------------------------------------------|--------|----------------------------|
| ECFP_12                                | 125442029   | 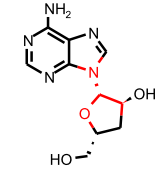<br><chem>*[C@H]1[*][*]O[C@H]1n(*)[*]</chem>                | 0.421  | 1 out of 1                 |
| ECFP_12                                | -801490360  | <br><chem>*[C@@H]1[*][*][C@@H]1[*]C1</chem>                 | 0.339  | 14 out of 31               |
| Top Features for negative contribution |             |                                                                                                                                                |        |                            |
| Fingerprint                            | Bit/Smiles  | Feature Structure                                                                                                                              | Score  | Carcinogen in training set |
| ECFP_12                                | -1734834311 | <br><chem>[*]:n:[c](N):[c](:[*])[*]</chem>                  | -0.560 | 1 out of 8                 |
| ECFP_12                                | 615197788   | <br><chem>[*]n1:[cH]:n:[c](:[c]([*]):[*]):[c]:1:[*]</chem> | -0.485 | 0 out of 2                 |
| ECFP_12                                | 376664744   | <br><chem>OC[C@H]1C[*][*]O1</chem>                        | -0.485 | 0 out of 2                 |

# Ribavirin

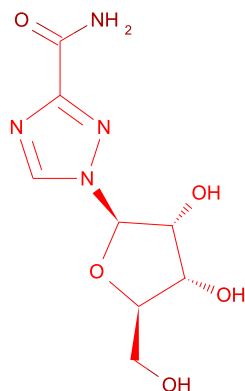

$C_8H_{12}N_4O_5$

Molecular Weight: 244.20467

ALogP: -2.745

Rotatable Bonds: 3

Acceptors: 7

Donors: 4

## Model Prediction

**Prediction: Carcinogen**

Probability: 0.758

Enrichment: 2.353

Bayesian Score: 14.116

Mahalanobis Distance: 9.133

Mahalanobis Distance p-value: 0.77

Prediction: Positive if the Bayesian score is above the estimated best cutoff value from minimizing the false positive and false negative rate.

Probability: The estimated probability that the sample is in the positive category. This assumes that the Bayesian score follows a normal distribution and is different from the prediction using a cutoff.

Enrichment: An estimate of enrichment, that is, the increased likelihood (versus random) of this sample being in the category.

Bayesian Score: The standard Laplacian-modified Bayesian score.

Mahalanobis Distance: The Mahalanobis distance (MD) is the distance to the center of the training data. The larger the MD, the less trustworthy the prediction.

Mahalanobis Distance p-value: The p-value gives the fraction of training data with an MD greater than or equal to the one for the given sample, assuming normally distributed data. The smaller the p-value, the less trustworthy the prediction. For highly non-normal X properties (e.g., fingerprints), the MD p-value is wildly inaccurate.

# TOPKAT\_Rat\_Female\_FDA\_None\_vs\_Carcinogen

## Structural Similar Compounds

| Name               | Ribavirin                                                           | Streptozocin                                                        | Ascorbic acid                                                       |
|--------------------|---------------------------------------------------------------------|---------------------------------------------------------------------|---------------------------------------------------------------------|
| Structure          |                                                                     |                                                                     |                                                                     |
| Actual Endpoint    | Carcinogen                                                          | Carcinogen                                                          | Non-Carcinogen                                                      |
| Predicted Endpoint | Carcinogen                                                          | Carcinogen                                                          | Non-Carcinogen                                                      |
| Distance           | 0.000                                                               | 0.590                                                               | 0.665                                                               |
| Reference          | US FDA (Centre for Drug Eval.& Res./Off. Testing & Res.) Sept. 1997 | US FDA (Centre for Drug Eval.& Res./Off. Testing & Res.) Sept. 1997 | US FDA (Centre for Drug Eval.& Res./Off. Testing & Res.) Sept. 1997 |

## Model Applicability

Unknown features are fingerprint features in the query molecule, but not found in the training set.

1. All properties and OPS components are within expected ranges.

## Feature Contribution

### Top features for positive contribution

| Fingerprint | Bit/Smiles | Feature Structure              | Score | Carcinogen in training set |
|-------------|------------|--------------------------------|-------|----------------------------|
| ECFP_12     | -553149446 | <br>[*]C[C@H]1O[*]1[*]C@@H1[*] | 0.575 | 3 out of 4                 |



| ECFP_12                                | 370123836  | 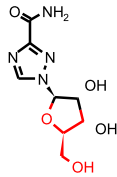<br><chem>[*][C@H]1[*][*][O][C@@H]1CO</chem>        | 0.575  | 3 out of 4                 |
|----------------------------------------|------------|----------------------------------------------------------------------------------------------------------------------------------------|--------|----------------------------|
| ECFP_12                                | 835630791  | <br><chem>[*]n1:[*]:[*]:[c]([*])n:1</chem>          | 0.437  | 2 out of 3                 |
| Top Features for negative contribution |            |                                                                                                                                        |        |                            |
| Fingerprint                            | Bit/Smiles | Feature Structure                                                                                                                      | Score  | Carcinogen in training set |
| ECFP_12                                | 672362763  | <br><chem>[*]n(:[*]):[*]</chem>                     | -0.198 | 7 out of 28                |
| ECFP_12                                | 305695353  | <br><chem>[*][C@@H]1[*][*][C@H]([*])[C@H]1O</chem> | -0.154 | 2 out of 8                 |
| ECFP_12                                | 1559650422 | <br><chem>[*]C[*]</chem>                          | -0.112 | 63 out of 226              |

AND Enantiomer

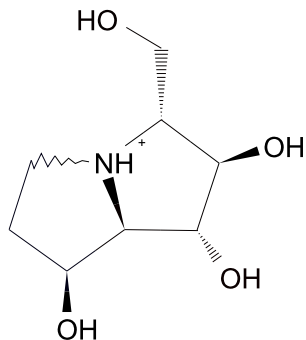 $C_8H_{16}NO_4$ 

Molecular Weight: 190.21693

ALogP: -3.556

Rotatable Bonds: 1

Acceptors: 4

Donors: 5

## Model Prediction

**Prediction: Multiple-Carcinogen**

Probability: 0.512

Enrichment: 1.370

Bayesian Score: 0.156

Mahalanobis Distance: 13.368

Mahalanobis Distance p-value: 0.000104

Prediction: Positive if the Bayesian score is above the estimated best cutoff value from minimizing the false positive and false negative rate.

Probability: The estimated probability that the sample is in the positive category. This assumes that the Bayesian score follows a normal distribution and is different from the prediction using a cutoff.

Enrichment: An estimate of enrichment, that is, the increased likelihood (versus random) of this sample being in the category.

Bayesian Score: The standard Laplacian-modified Bayesian score.

Mahalanobis Distance: The Mahalanobis distance (MD) is the distance to the center of the training data. The larger the MD, the less trustworthy the prediction.

Mahalanobis Distance p-value: The p-value gives the fraction of training data with an MD greater than or equal to the one for the given sample, assuming normally distributed data. The smaller the p-value, the less trustworthy the prediction. For highly non-normal X properties (e.g., fingerprints), the MD p-value is wildly inaccurate.

## Structural Similar Compounds

| Name               | Ribavirin                                                           | Streptozocin                                                        | Zidovudine                                                          |
|--------------------|---------------------------------------------------------------------|---------------------------------------------------------------------|---------------------------------------------------------------------|
| Structure          |                                                                     |                                                                     |                                                                     |
| Actual Endpoint    | Multiple-Carcinogen                                                 | Multiple-Carcinogen                                                 | Single-Carcinogen                                                   |
| Predicted Endpoint | Multiple-Carcinogen                                                 | Multiple-Carcinogen                                                 | Single-Carcinogen                                                   |
| Distance           | 0.868                                                               | 0.914                                                               | 0.991                                                               |
| Reference          | US FDA (Centre for Drug Eval.& Res./Off. Testing & Res.) Sept. 1997 | US FDA (Centre for Drug Eval.& Res./Off. Testing & Res.) Sept. 1997 | US FDA (Centre for Drug Eval.& Res./Off. Testing & Res.) Sept. 1997 |

## Model Applicability

Unknown features are fingerprint features in the query molecule, but not found in the training set.

1. All properties and OPS components are within expected ranges.

## Feature Contribution

### Top features for positive contribution

| Fingerprint | Bit/Smiles | Feature Structure             | Score | Multiple-Carcinogen in training set |
|-------------|------------|-------------------------------|-------|-------------------------------------|
| SCFP_4      | 0          | <br><chem>[*]C([*])[*]</chem> | 0.155 | 41 out of 111                       |

|                                        |             |                                                                                                                                         |        |                                     |
|----------------------------------------|-------------|-----------------------------------------------------------------------------------------------------------------------------------------|--------|-------------------------------------|
| SCFP_4                                 | -424515134  | 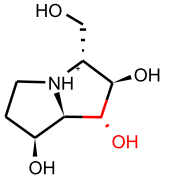<br><chem>[*]C([*])O</chem>                          | 0.131  | 12 out of 33                        |
| SCFP_4                                 | -711686199  | <br><chem>[*]C([*])CO</chem>                         | 0.119  | 9 out of 25                         |
| Top Features for negative contribution |             |                                                                                                                                         |        |                                     |
| Fingerprint                            | Bit/Smiles  | Feature Structure                                                                                                                       | Score  | Multiple-Carcinogen in training set |
| SCFP_4                                 | -1272798659 | <br><chem>[*][C@@H]1[*][*]CC1</chem>                 | -0.421 | 10 out of 50                        |
| SCFP_4                                 | 1702634808  | <br><chem>[*][C@@H]1[*][*][C@H]([*])[C@H]1O</chem> | 0.000  | 7 out of 21                         |

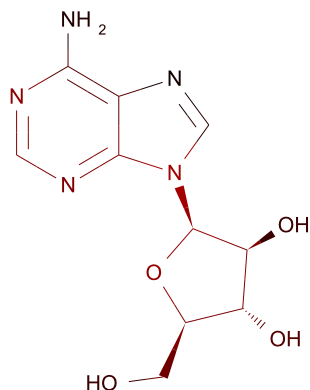

C<sub>10</sub>H<sub>13</sub>N<sub>5</sub>O<sub>4</sub>

Molecular Weight: 267.24132

ALogP: -1.881

Rotatable Bonds: 2

Acceptors: 8

Donors: 4

## Model Prediction

**Prediction: Multiple-Carcinogen**

Probability: 0.785

Enrichment: 2.098

Bayesian Score: 7.794

Mahalanobis Distance: 10.001

Mahalanobis Distance p-value: 0.0611

Prediction: Positive if the Bayesian score is above the estimated best cutoff value from minimizing the false positive and false negative rate.

Probability: The estimated probability that the sample is in the positive category. This assumes that the Bayesian score follows a normal distribution and is different from the prediction using a cutoff.

Enrichment: An estimate of enrichment, that is, the increased likelihood (versus random) of this sample being in the category.

Bayesian Score: The standard Laplacian-modified Bayesian score.

Mahalanobis Distance: The Mahalanobis distance (MD) is the distance to the center of the training data. The larger the MD, the less trustworthy the prediction.

Mahalanobis Distance p-value: The p-value gives the fraction of training data with an MD greater than or equal to the one for the given sample, assuming normally distributed data. The smaller the p-value, the less trustworthy the prediction. For highly non-normal X properties (e.g., fingerprints), the MD p-value is wildly inaccurate.

## Structural Similar Compounds

| Name               | Ribavirin                                                           | Streptozocin                                                        | Zidovudine                                                          |
|--------------------|---------------------------------------------------------------------|---------------------------------------------------------------------|---------------------------------------------------------------------|
| Structure          |                                                                     |                                                                     |                                                                     |
| Actual Endpoint    | Multiple-Carcinogen                                                 | Multiple-Carcinogen                                                 | Single-Carcinogen                                                   |
| Predicted Endpoint | Multiple-Carcinogen                                                 | Multiple-Carcinogen                                                 | Single-Carcinogen                                                   |
| Distance           | 0.500                                                               | 0.614                                                               | 0.775                                                               |
| Reference          | US FDA (Centre for Drug Eval.& Res./Off. Testing & Res.) Sept. 1997 | US FDA (Centre for Drug Eval.& Res./Off. Testing & Res.) Sept. 1997 | US FDA (Centre for Drug Eval.& Res./Off. Testing & Res.) Sept. 1997 |

## Model Applicability

Unknown features are fingerprint features in the query molecule, but not found in the training set.

1. All properties and OPS components are within expected ranges.

## Feature Contribution

### Top features for positive contribution

| Fingerprint | Bit/Smiles  | Feature Structure                        | Score | Multiple-Carcinogen in training set |
|-------------|-------------|------------------------------------------|-------|-------------------------------------|
| SCFP_4      | -1065373877 | <br>[*][c]1:[*]:[c](:[*])<br>:n:[cH]:n:1 | 0.721 | 3 out of 3                          |

|                                        |             |                                                                                                                                                     |        |                                     |
|----------------------------------------|-------------|-----------------------------------------------------------------------------------------------------------------------------------------------------|--------|-------------------------------------|
| SCFP_4                                 | -1181430618 | 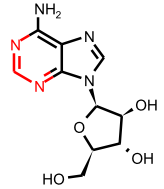<br>[*]:n:[cH]:n:[*]                                             | 0.663  | 4 out of 5                          |
| SCFP_4                                 | 2142983647  | <br>[*]n1:[*]:[*]:[c]2:[*]<br>]:n:[cH]:n:[c]:1:2                 | 0.610  | 2 out of 2                          |
| Top Features for negative contribution |             |                                                                                                                                                     |        |                                     |
| Fingerprint                            | Bit/Smiles  | Feature Structure                                                                                                                                   | Score  | Multiple-Carcinogen in training set |
| SCFP_4                                 | 1785884858  | <br>[*]C([*])n1:[cH]:n:[c]<br>]2:[c]([*]):[*]:[cH]<br>:n:[c]:1:2 | -0.274 | 0 out of 1                          |
| SCFP_4                                 | 276193969   | <br>[*][C@@H]1[*][*][C@H]<br>([*])O1                           | -0.079 | 4 out of 14                         |
| SCFP_4                                 | 1334878018  | <br>[*]:n:[c](N):[c](:[*]<br>):[*]                             | -0.066 | 2 out of 7                          |



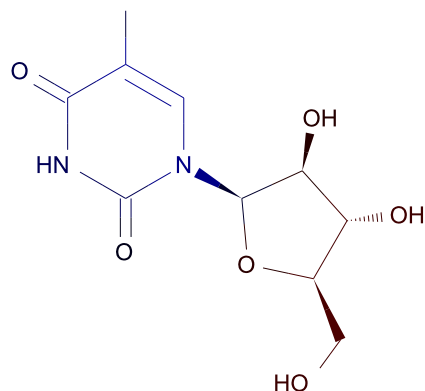
 $C_{10}H_{14}N_2O_6$ 

Molecular Weight: 258.22795

ALogP: -2.005

Rotatable Bonds: 2

Acceptors: 6

Donors: 4

## Model Prediction

Prediction: Single-Carcinogen

Probability: 0.432

Enrichment: 1.156

Bayesian Score: -2.416

Mahalanobis Distance: 10.191

Mahalanobis Distance p-value: 0.0455

Prediction: Positive if the Bayesian score is above the estimated best cutoff value from minimizing the false positive and false negative rate.

Probability: The estimated probability that the sample is in the positive category. This assumes that the Bayesian score follows a normal distribution and is different from the prediction using a cutoff.

Enrichment: An estimate of enrichment, that is, the increased likelihood (versus random) of this sample being in the category.

Bayesian Score: The standard Laplacian-modified Bayesian score.

Mahalanobis Distance: The Mahalanobis distance (MD) is the distance to the center of the training data. The larger the MD, the less trustworthy the prediction.

Mahalanobis Distance p-value: The p-value gives the fraction of training data with an MD greater than or equal to the one for the given sample, assuming normally distributed data. The smaller the p-value, the less trustworthy the prediction. For highly non-normal X properties (e.g., fingerprints), the MD p-value is wildly inaccurate.

## Structural Similar Compounds

| Name               | Zidovudine                                                          | Ribavirin                                                           | Streptozocin                                                        |
|--------------------|---------------------------------------------------------------------|---------------------------------------------------------------------|---------------------------------------------------------------------|
| Structure          |                                                                     |                                                                     |                                                                     |
| Actual Endpoint    | Single-Carcinogen                                                   | Multiple-Carcinogen                                                 | Multiple-Carcinogen                                                 |
| Predicted Endpoint | Single-Carcinogen                                                   | Multiple-Carcinogen                                                 | Multiple-Carcinogen                                                 |
| Distance           | 0.458                                                               | 0.573                                                               | 0.650                                                               |
| Reference          | US FDA (Centre for Drug Eval.& Res./Off. Testing & Res.) Sept. 1997 | US FDA (Centre for Drug Eval.& Res./Off. Testing & Res.) Sept. 1997 | US FDA (Centre for Drug Eval.& Res./Off. Testing & Res.) Sept. 1997 |

## Model Applicability

Unknown features are fingerprint features in the query molecule, but not found in the training set.

1. All properties and OPS components are within expected ranges.

## Feature Contribution

### Top features for positive contribution

| Fingerprint | Bit/Smiles  | Feature Structure                                      | Score | Multiple-Carcinogen in training set |
|-------------|-------------|--------------------------------------------------------|-------|-------------------------------------|
| SCFP_4      | -1486266146 | <br><chem>[*]C[C@H]1O[C@@H]([*])C@H]([O])C@H]1O</chem> | 0.610 | 2 out of 2                          |

|                                        |             |                                                                                                                                           |        |                                     |
|----------------------------------------|-------------|-------------------------------------------------------------------------------------------------------------------------------------------|--------|-------------------------------------|
| SCFP_4                                 | -1715619483 | 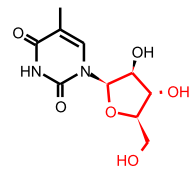<br><chem>[*][C@@H]1O[C@H](CO)[C@@H](O)[C@H]1[*]</chem> | 0.610  | 2 out of 2                          |
| SCFP_4                                 | -188384666  | <br><chem>[*][C@H]1[*][*]O[C@@H]1CO</chem>             | 0.433  | 2 out of 3                          |
| Top Features for negative contribution |             |                                                                                                                                           |        |                                     |
| Fingerprint                            | Bit/Smiles  | Feature Structure                                                                                                                         | Score  | Multiple-Carcinogen in training set |
| SCFP_4                                 | 1257024795  | <br><chem>[*]NC(=O)C(=[*])[*]</chem>                   | -0.666 | 0 out of 3                          |
| SCFP_4                                 | 399659969   | <br><chem>[*]C([*])N(C=[*])C(=[*])[*]</chem>         | -0.666 | 0 out of 3                          |
| SCFP_4                                 | -1971435055 | <br><chem>[*]N([*])C=C([*])[*]</chem>                | -0.489 | 0 out of 2                          |





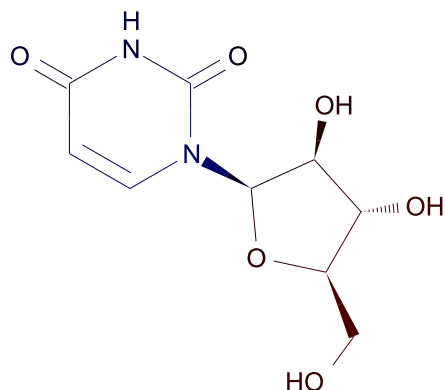

$C_9H_{12}N_2O_6$

Molecular Weight: 244.20137

ALogP: -2.451

Rotatable Bonds: 2

Acceptors: 6

Donors: 4

## Model Prediction

Prediction: Single-Carcinogen

Probability: 0.486

Enrichment: 1.300

Bayesian Score: -0.901

Mahalanobis Distance: 9.758

Mahalanobis Distance p-value: 0.0874

Prediction: Positive if the Bayesian score is above the estimated best cutoff value from minimizing the false positive and false negative rate.

Probability: The estimated probability that the sample is in the positive category. This assumes that the Bayesian score follows a normal distribution and is different from the prediction using a cutoff.

Enrichment: An estimate of enrichment, that is, the increased likelihood (versus random) of this sample being in the category.

Bayesian Score: The standard Laplacian-modified Bayesian score.

Mahalanobis Distance: The Mahalanobis distance (MD) is the distance to the center of the training data. The larger the MD, the less trustworthy the prediction.

Mahalanobis Distance p-value: The p-value gives the fraction of training data with an MD greater than or equal to the one for the given sample, assuming normally distributed data. The smaller the p-value, the less trustworthy the prediction. For highly non-normal X properties (e.g., fingerprints), the MD p-value is wildly inaccurate.

## Structural Similar Compounds

| Name               | Ribavirin                                                           | Zidovudine                                                          | Streptozocin                                                        |
|--------------------|---------------------------------------------------------------------|---------------------------------------------------------------------|---------------------------------------------------------------------|
| Structure          |                                                                     |                                                                     |                                                                     |
| Actual Endpoint    | Multiple-Carcinogen                                                 | Single-Carcinogen                                                   | Multiple-Carcinogen                                                 |
| Predicted Endpoint | Multiple-Carcinogen                                                 | Single-Carcinogen                                                   | Multiple-Carcinogen                                                 |
| Distance           | 0.519                                                               | 0.573                                                               | 0.630                                                               |
| Reference          | US FDA (Centre for Drug Eval.& Res./Off. Testing & Res.) Sept. 1997 | US FDA (Centre for Drug Eval.& Res./Off. Testing & Res.) Sept. 1997 | US FDA (Centre for Drug Eval.& Res./Off. Testing & Res.) Sept. 1997 |

## Model Applicability

Unknown features are fingerprint features in the query molecule, but not found in the training set.

1. All properties and OPS components are within expected ranges.

## Feature Contribution

### Top features for positive contribution

| Fingerprint | Bit/Smiles  | Feature Structure                                       | Score | Multiple-Carcinogen in training set |
|-------------|-------------|---------------------------------------------------------|-------|-------------------------------------|
| SCFP_4      | -1715619483 | <br><chem>[*][C@@H]1O[C@H](CO)[C@@H](O)[C@H]1[*]</chem> | 0.610 | 2 out of 2                          |

|                                        |             |                                                                                                                                            |        |                                     |
|----------------------------------------|-------------|--------------------------------------------------------------------------------------------------------------------------------------------|--------|-------------------------------------|
| SCFP_4                                 | -1486266146 | 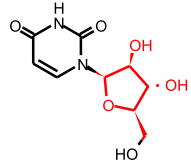<br><chem>[*]C[C@H]1O[C@@H]([*])C@@H](O)[C@@H]1O</chem> | 0.610  | 2 out of 2                          |
| SCFP_4                                 | -188384666  | <br><chem>[*][C@H]1[*][*]O[C@@H]1CO</chem>              | 0.433  | 2 out of 3                          |
| Top Features for negative contribution |             |                                                                                                                                            |        |                                     |
| Fingerprint                            | Bit/Smiles  | Feature Structure                                                                                                                          | Score  | Multiple-Carcinogen in training set |
| SCFP_4                                 | 399659969   | <br><chem>[*]C([*])N(C=[*])C(=[*])[*]</chem>            | -0.666 | 0 out of 3                          |
| SCFP_4                                 | 1257024795  | <br><chem>[*]NC(=O)C(=[*])[*]</chem>                  | -0.666 | 0 out of 3                          |
| SCFP_4                                 | -1971435055 | <br><chem>[*]N([*])C=C([*])[*]</chem>                 | -0.489 | 0 out of 2                          |



# Ribavirin

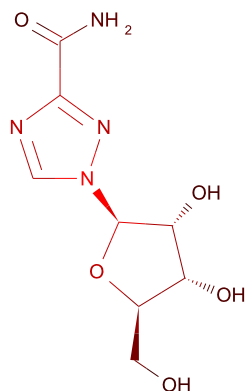

$C_8H_{12}N_4O_5$

Molecular Weight: 244.20467

ALogP: -2.745

Rotatable Bonds: 3

Acceptors: 7

Donors: 4

## Model Prediction

**Prediction: Multiple-Carcinogen**

Probability: 0.836

Enrichment: 2.236

Bayesian Score: 9.443

Mahalanobis Distance: 7.485

Mahalanobis Distance p-value: 0.76

Prediction: Positive if the Bayesian score is above the estimated best cutoff value from minimizing the false positive and false negative rate.

Probability: The estimated probability that the sample is in the positive category. This assumes that the Bayesian score follows a normal distribution and is different from the prediction using a cutoff.

Enrichment: An estimate of enrichment, that is, the increased likelihood (versus random) of this sample being in the category.

Bayesian Score: The standard Laplacian-modified Bayesian score.

Mahalanobis Distance: The Mahalanobis distance (MD) is the distance to the center of the training data. The larger the MD, the less trustworthy the prediction.

Mahalanobis Distance p-value: The p-value gives the fraction of training data with an MD greater than or equal to the one for the given sample, assuming normally distributed data. The smaller the p-value, the less trustworthy the prediction. For highly non-normal X properties (e.g., fingerprints), the MD p-value is wildly inaccurate.

# TOPKAT\_Rat\_Female\_FDA\_Single\_vs\_Multiple

## Structural Similar Compounds

| Name               | Ribavirin                                                           | Streptozocin                                                        | Zidovudine                                                          |
|--------------------|---------------------------------------------------------------------|---------------------------------------------------------------------|---------------------------------------------------------------------|
| Structure          |                                                                     |                                                                     |                                                                     |
| Actual Endpoint    | Multiple-Carcinogen                                                 | Multiple-Carcinogen                                                 | Single-Carcinogen                                                   |
| Predicted Endpoint | Multiple-Carcinogen                                                 | Multiple-Carcinogen                                                 | Single-Carcinogen                                                   |
| Distance           | 0.000                                                               | 0.582                                                               | 0.765                                                               |
| Reference          | US FDA (Centre for Drug Eval.& Res./Off. Testing & Res.) Sept. 1997 | US FDA (Centre for Drug Eval.& Res./Off. Testing & Res.) Sept. 1997 | US FDA (Centre for Drug Eval.& Res./Off. Testing & Res.) Sept. 1997 |

## Model Applicability

Unknown features are fingerprint features in the query molecule, but not found in the training set.

1. All properties and OPS components are within expected ranges.

## Feature Contribution

### Top features for positive contribution

| Fingerprint | Bit/Smiles  | Feature Structure    | Score | Multiple-Carcinogen in training set |
|-------------|-------------|----------------------|-------|-------------------------------------|
| SCFP_4      | -1181430618 | <br>[*]:n:[cH]:n:[*] | 0.663 | 4 out of 5                          |

| SCFP_4                                 | -1486266146 | 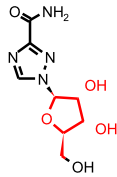<br><chem>[*]C[C@H]1O[C@@H]([*])C@@H](O)[C@@H]1O</chem>  | 0.610  | 2 out of 2                          |
|----------------------------------------|-------------|---------------------------------------------------------------------------------------------------------------------------------------------|--------|-------------------------------------|
| SCFP_4                                 | -1715619483 | <br><chem>[*][C@@H]1O[C@H](CO)[C@@H](O)[C@@H]1[*]</chem> | 0.610  | 2 out of 2                          |
| Top Features for negative contribution |             |                                                                                                                                             |        |                                     |
| Fingerprint                            | Bit/Smiles  | Feature Structure                                                                                                                           | Score  | Multiple-Carcinogen in training set |
| SCFP_4                                 | 276193969   | <br><chem>[*][C@@H]1[*][*][C@H]([*])O1</chem>            | -0.079 | 4 out of 14                         |
| SCFP_4                                 | 1702634808  | <br><chem>[*][C@@H]1[*][*][C@H]([*])C@H]1O</chem>      | 0.000  | 7 out of 21                         |

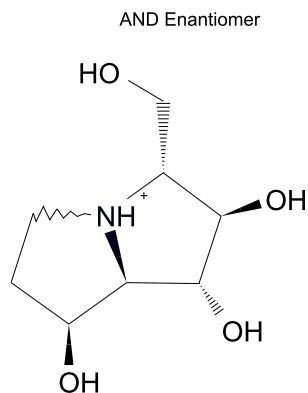

$C_8H_{16}NO_4$   
 Molecular Weight: 190.21693  
 ALogP: -3.556  
 Rotatable Bonds: 1  
 Acceptors: 4  
 Donors: 5

## Model Prediction

Prediction: Non-Carcinogen

Probability: 0.320

Enrichment: 0.957

Bayesian Score: -1.335

Mahalanobis Distance: 8.333

Mahalanobis Distance p-value: 0.995

Prediction: Positive if the Bayesian score is above the estimated best cutoff value from minimizing the false positive and false negative rate.

Probability: The estimated probability that the sample is in the positive category. This assumes that the Bayesian score follows a normal distribution and is different from the prediction using a cutoff.

Enrichment: An estimate of enrichment, that is, the increased likelihood (versus random) of this sample being in the category.

Bayesian Score: The standard Laplacian-modified Bayesian score.

Mahalanobis Distance: The Mahalanobis distance (MD) is the distance to the center of the training data. The larger the MD, the less trustworthy the prediction.

Mahalanobis Distance p-value: The p-value gives the fraction of training data with an MD greater than or equal to the one for the given sample, assuming normally distributed data. The smaller the p-value, the less trustworthy the prediction. For highly non-normal X properties (e.g., fingerprints), the MD p-value is wildly inaccurate.

## Structural Similar Compounds

| Name               | Methyldopa                                                          | Mannitol                                                            | Ascorbic acid                                                       |
|--------------------|---------------------------------------------------------------------|---------------------------------------------------------------------|---------------------------------------------------------------------|
| Structure          |                                                                     |                                                                     |                                                                     |
| Actual Endpoint    | Non-Carcinogen                                                      | Non-Carcinogen                                                      | Non-Carcinogen                                                      |
| Predicted Endpoint | Non-Carcinogen                                                      | Non-Carcinogen                                                      | Non-Carcinogen                                                      |
| Distance           | 0.749                                                               | 0.811                                                               | 0.816                                                               |
| Reference          | US FDA (Centre for Drug Eval.& Res./Off. Testing & Res.) Sept. 1997 | US FDA (Centre for Drug Eval.& Res./Off. Testing & Res.) Sept. 1997 | US FDA (Centre for Drug Eval.& Res./Off. Testing & Res.) Sept. 1997 |

## Model Applicability

Unknown features are fingerprint features in the query molecule, but not found in the training set.

1. All properties and OPS components are within expected ranges.

## Feature Contribution

### Top features for positive contribution

| Fingerprint | Bit/Smiles | Feature Structure                        | Score | Carcinogen in training set |
|-------------|------------|------------------------------------------|-------|----------------------------|
| SCFP_6      | 1702634808 | <br><chem>*[C@@H]1[C@H]([C@H]1O)O</chem> | 0.117 | 25 out of 69               |

### Top Features for negative contribution

| Fingerprint | Bit/Smiles | Feature Structure | Score | Carcinogen in training set |
|-------------|------------|-------------------|-------|----------------------------|
|-------------|------------|-------------------|-------|----------------------------|

|        |             |                                                                                                                                                              |        |               |
|--------|-------------|--------------------------------------------------------------------------------------------------------------------------------------------------------------|--------|---------------|
| SCFP_6 | -1688753455 | <br><chem>[*][C@H]1[*][*][NH+2</chem><br><chem>[*][*][C@H]([*])C12</chem> | -0.278 | 0 out of 1    |
| SCFP_6 | 11          | <br><chem>[*][NH+][(*)][*]</chem>                                         | -0.278 | 0 out of 1    |
| SCFP_6 | -424515134  | <br><chem>[*]C([*])O</chem>                                               | -0.157 | 30 out of 110 |



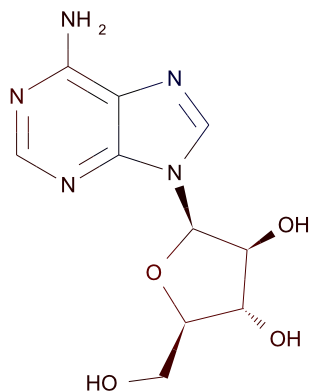

$C_{10}H_{13}N_5O_4$

Molecular Weight: 267.24132

ALogP: -1.881

Rotatable Bonds: 2

Acceptors: 8

Donors: 4

## Model Prediction

Prediction: Carcinogen

Probability: 0.427

Enrichment: 1.277

Bayesian Score: 2.266

Mahalanobis Distance: 10.667

Mahalanobis Distance p-value: 0.342

Prediction: Positive if the Bayesian score is above the estimated best cutoff value from minimizing the false positive and false negative rate.

Probability: The estimated probability that the sample is in the positive category. This assumes that the Bayesian score follows a normal distribution and is different from the prediction using a cutoff.

Enrichment: An estimate of enrichment, that is, the increased likelihood (versus random) of this sample being in the category.

Bayesian Score: The standard Laplacian-modified Bayesian score.

Mahalanobis Distance: The Mahalanobis distance (MD) is the distance to the center of the training data. The larger the MD, the less trustworthy the prediction.

Mahalanobis Distance p-value: The p-value gives the fraction of training data with an MD greater than or equal to the one for the given sample, assuming normally distributed data. The smaller the p-value, the less trustworthy the prediction. For highly non-normal X properties (e.g., fingerprints), the MD p-value is wildly inaccurate.

## Structural Similar Compounds

| Name               | Ribavirin                                                           | Streptozocin                                                        | Acyclovir                                                           |
|--------------------|---------------------------------------------------------------------|---------------------------------------------------------------------|---------------------------------------------------------------------|
| Structure          |                                                                     |                                                                     |                                                                     |
| Actual Endpoint    | Carcinogen                                                          | Carcinogen                                                          | Non-Carcinogen                                                      |
| Predicted Endpoint | Carcinogen                                                          | Carcinogen                                                          | Non-Carcinogen                                                      |
| Distance           | 0.539                                                               | 0.606                                                               | 0.708                                                               |
| Reference          | US FDA (Centre for Drug Eval.& Res./Off. Testing & Res.) Sept. 1997 | US FDA (Centre for Drug Eval.& Res./Off. Testing & Res.) Sept. 1997 | US FDA (Centre for Drug Eval.& Res./Off. Testing & Res.) Sept. 1997 |

## Model Applicability

Unknown features are fingerprint features in the query molecule, but not found in the training set.

1. All properties and OPS components are within expected ranges.

## Feature Contribution

### Top features for positive contribution

| Fingerprint | Bit/Smiles  | Feature Structure                       | Score | Carcinogen in training set |
|-------------|-------------|-----------------------------------------|-------|----------------------------|
| SCFP_6      | -1065373877 | <br>[*][c]1:[*]:[c]([*])<br>:n:[cH]:n:1 | 0.429 | 3 out of 5                 |

| SCFP_6                                 | -1559337158 | 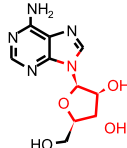<br><chem>*[C@H]1O[C@@H]([C@@H](O)[C@H]1O)n(*)</chem>       | 0.415  | 1 out of 1                 |
|----------------------------------------|-------------|------------------------------------------------------------------------------------------------------------------------------------------------|--------|----------------------------|
| SCFP_6                                 | -2147171373 | <br><chem>*:[c]1:[*]:n:[cH]:n:[c]:1N</chem>                 | 0.415  | 1 out of 1                 |
| Top Features for negative contribution |             |                                                                                                                                                |        |                            |
| Fingerprint                            | Bit/Smiles  | Feature Structure                                                                                                                              | Score  | Carcinogen in training set |
| SCFP_6                                 | -1519771906 | <br><chem>*[C](*)n1:[cH]:n:[c](:[*]):[c]:1:[*]</chem>       | -0.484 | 1 out of 7                 |
| SCFP_6                                 | 194135988   | <br><chem>N[c]1:n:[cH]:[*]:[c]2:[*]:[*]:n:[c]:1:2</chem>   | -0.278 | 0 out of 1                 |
| SCFP_6                                 | -430442553  | <br><chem>*[n]1:[cH]:n:[c]2:[c](N):n:[*]:n:[c]:1:2</chem> | -0.278 | 0 out of 1                 |

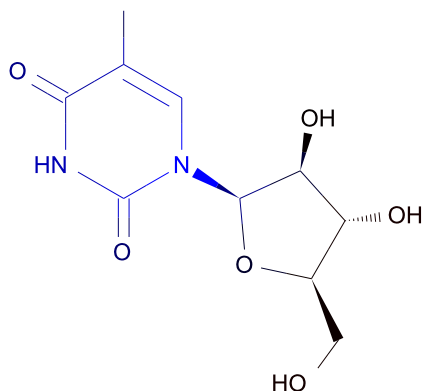

$C_{10}H_{14}N_2O_6$

Molecular Weight: 258.22795

ALogP: -2.005

Rotatable Bonds: 2

Acceptors: 6

Donors: 4

## Model Prediction

Prediction: Non-Carcinogen

Probability: 0.202

Enrichment: 0.603

Bayesian Score: -7.231

Mahalanobis Distance: 10.401

Mahalanobis Distance p-value: 0.463

Prediction: Positive if the Bayesian score is above the estimated best cutoff value from minimizing the false positive and false negative rate.

Probability: The estimated probability that the sample is in the positive category. This assumes that the Bayesian score follows a normal distribution and is different from the prediction using a cutoff.

Enrichment: An estimate of enrichment, that is, the increased likelihood (versus random) of this sample being in the category.

Bayesian Score: The standard Laplacian-modified Bayesian score.

Mahalanobis Distance: The Mahalanobis distance (MD) is the distance to the center of the training data. The larger the MD, the less trustworthy the prediction.

Mahalanobis Distance p-value: The p-value gives the fraction of training data with an MD greater than or equal to the one for the given sample, assuming normally distributed data. The smaller the p-value, the less trustworthy the prediction. For highly non-normal X properties (e.g., fingerprints), the MD p-value is wildly inaccurate.

## Structural Similar Compounds

| Name               | Zidovudine                                                          | Methyldopa                                                          | Ribavirin                                                           |
|--------------------|---------------------------------------------------------------------|---------------------------------------------------------------------|---------------------------------------------------------------------|
| Structure          |                                                                     |                                                                     |                                                                     |
| Actual Endpoint    | Non-Carcinogen                                                      | Non-Carcinogen                                                      | Carcinogen                                                          |
| Predicted Endpoint | Non-Carcinogen                                                      | Non-Carcinogen                                                      | Carcinogen                                                          |
| Distance           | 0.481                                                               | 0.602                                                               | 0.611                                                               |
| Reference          | US FDA (Centre for Drug Eval.& Res./Off. Testing & Res.) Sept. 1997 | US FDA (Centre for Drug Eval.& Res./Off. Testing & Res.) Sept. 1997 | US FDA (Centre for Drug Eval.& Res./Off. Testing & Res.) Sept. 1997 |

## Model Applicability

Unknown features are fingerprint features in the query molecule, but not found in the training set.

1. All properties and OPS components are within expected ranges.

## Feature Contribution

### Top features for positive contribution

| Fingerprint | Bit/Smiles | Feature Structure                             | Score | Carcinogen in training set |
|-------------|------------|-----------------------------------------------|-------|----------------------------|
| SCFP_6      | 55464376   | <br><chem>[*]C=C(C(C)/C(=[*])[*]<br/>]</chem> | 0.345 | 14 out of 30               |

| SCFP_6                                 | -1715619483 | 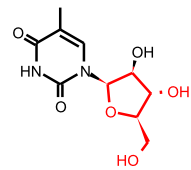<br><chem>[*][C@@H]1O[C@H](CO)[C@@H](O)[C@H]1[*]</chem> | 0.273  | 2 out of 4                 |
|----------------------------------------|-------------|-------------------------------------------------------------------------------------------------------------------------------------------|--------|----------------------------|
| SCFP_6                                 | 136627117   | <br><chem>[*]C(=[*])C</chem>                           | 0.167  | 18 out of 47               |
| Top Features for negative contribution |             |                                                                                                                                           |        |                            |
| Fingerprint                            | Bit/Smiles  | Feature Structure                                                                                                                         | Score  | Carcinogen in training set |
| SCFP_6                                 | -1971435055 | <br><chem>[*]N([*])C=C([*])[*]</chem>                  | -0.825 | 0 out of 4                 |
| SCFP_6                                 | 399659969   | <br><chem>[*]C([*])N(C=[*])C(=[*])[*]</chem>          | -0.578 | 1 out of 8                 |
| SCFP_6                                 | -628337057  | <br><chem>[*]=C1[*]C=C(C)C(=O)N1</chem>              | -0.496 | 0 out of 2                 |

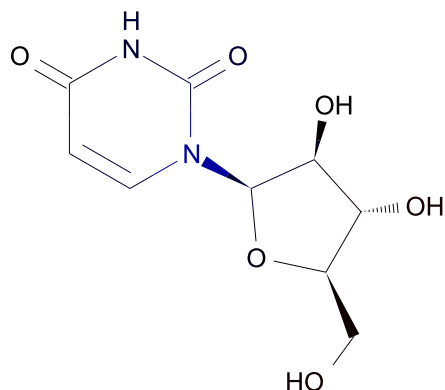

$C_9H_{12}N_2O_6$

Molecular Weight: 244.20137

ALogP: -2.451

Rotatable Bonds: 2

Acceptors: 6

Donors: 4

## Model Prediction

Prediction: Non-Carcinogen

Probability: 0.257

Enrichment: 0.769

Bayesian Score: -4.047

Mahalanobis Distance: 9.470

Mahalanobis Distance p-value: 0.855

Prediction: Positive if the Bayesian score is above the estimated best cutoff value from minimizing the false positive and false negative rate.

Probability: The estimated probability that the sample is in the positive category. This assumes that the Bayesian score follows a normal distribution and is different from the prediction using a cutoff.

Enrichment: An estimate of enrichment, that is, the increased likelihood (versus random) of this sample being in the category.

Bayesian Score: The standard Laplacian-modified Bayesian score.

Mahalanobis Distance: The Mahalanobis distance (MD) is the distance to the center of the training data. The larger the MD, the less trustworthy the prediction.

Mahalanobis Distance p-value: The p-value gives the fraction of training data with an MD greater than or equal to the one for the given sample, assuming normally distributed data. The smaller the p-value, the less trustworthy the prediction. For highly non-normal X properties (e.g., fingerprints), the MD p-value is wildly inaccurate.

## Structural Similar Compounds

| Name               | Ribavirin                                                           | Methyldopa                                                          | Ascorbic acid                                                       |
|--------------------|---------------------------------------------------------------------|---------------------------------------------------------------------|---------------------------------------------------------------------|
| Structure          |                                                                     |                                                                     |                                                                     |
| Actual Endpoint    | Carcinogen                                                          | Non-Carcinogen                                                      | Non-Carcinogen                                                      |
| Predicted Endpoint | Carcinogen                                                          | Non-Carcinogen                                                      | Non-Carcinogen                                                      |
| Distance           | 0.551                                                               | 0.623                                                               | 0.625                                                               |
| Reference          | US FDA (Centre for Drug Eval.& Res./Off. Testing & Res.) Sept. 1997 | US FDA (Centre for Drug Eval.& Res./Off. Testing & Res.) Sept. 1997 | US FDA (Centre for Drug Eval.& Res./Off. Testing & Res.) Sept. 1997 |

## Model Applicability

Unknown features are fingerprint features in the query molecule, but not found in the training set.

1. All properties and OPS components are within expected ranges.

## Feature Contribution

### Top features for positive contribution

| Fingerprint | Bit/Smiles | Feature Structure                    | Score | Carcinogen in training set |
|-------------|------------|--------------------------------------|-------|----------------------------|
| SCFP_6      | 1225693839 | <br><chem>[*]=C1[*]C=CC(=O)N1</chem> | 0.425 | 2 out of 3                 |

| SCFP_6                                 | -1971196727 | 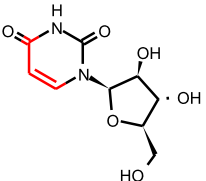<br><chem>[*]C=C/C(=[*])[*]</chem>                     | 0.361  | 17 out of 36               |
|----------------------------------------|-------------|-------------------------------------------------------------------------------------------------------------------------------------------|--------|----------------------------|
| SCFP_6                                 | -1715619483 | <br><chem>[*]C@@H]1O[C@H](CO)[C@@H](O)[C@H]1[*]</chem> | 0.273  | 2 out of 4                 |
| Top Features for negative contribution |             |                                                                                                                                           |        |                            |
| Fingerprint                            | Bit/Smiles  | Feature Structure                                                                                                                         | Score  | Carcinogen in training set |
| SCFP_6                                 | -1971435055 | <br><chem>[*]N([*])C=C([*])[*]</chem>                  | -0.825 | 0 out of 4                 |
| SCFP_6                                 | 399659969   | <br><chem>[*]C([*])N(C=[*])C(=[*])[*]</chem>          | -0.578 | 1 out of 8                 |
| SCFP_6                                 | 1061310967  | <br><chem>[*]N1[*]=C([*])C(=O)N1C=O</chem>           | -0.496 | 0 out of 2                 |

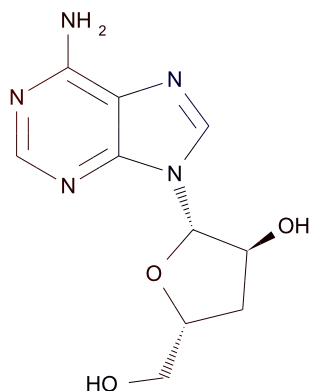
 $C_{10}H_{13}N_5O_3$ 

Molecular Weight: 251.24191

ALogP: -1.308

Rotatable Bonds: 2

Acceptors: 7

Donors: 3

## Model Prediction

**Prediction: Carcinogen**

Probability: 0.414

Enrichment: 1.239

Bayesian Score: 1.879

Mahalanobis Distance: 10.643

Mahalanobis Distance p-value: 0.352

Prediction: Positive if the Bayesian score is above the estimated best cutoff value from minimizing the false positive and false negative rate.

Probability: The estimated probability that the sample is in the positive category. This assumes that the Bayesian score follows a normal distribution and is different from the prediction using a cutoff.

Enrichment: An estimate of enrichment, that is, the increased likelihood (versus random) of this sample being in the category.

Bayesian Score: The standard Laplacian-modified Bayesian score.

Mahalanobis Distance: The Mahalanobis distance (MD) is the distance to the center of the training data. The larger the MD, the less trustworthy the prediction.

Mahalanobis Distance p-value: The p-value gives the fraction of training data with an MD greater than or equal to the one for the given sample, assuming normally distributed data. The smaller the p-value, the less trustworthy the prediction. For highly non-normal X properties (e.g., fingerprints), the MD p-value is wildly inaccurate.

## Structural Similar Compounds

| Name               | Acyclovir                                                           | Zidovudine                                                          | Didanosine                                                          |
|--------------------|---------------------------------------------------------------------|---------------------------------------------------------------------|---------------------------------------------------------------------|
| Structure          |                                                                     |                                                                     |                                                                     |
| Actual Endpoint    | Non-Carcinogen                                                      | Non-Carcinogen                                                      | Non-Carcinogen                                                      |
| Predicted Endpoint | Non-Carcinogen                                                      | Non-Carcinogen                                                      | Non-Carcinogen                                                      |
| Distance           | 0.592                                                               | 0.617                                                               | 0.652                                                               |
| Reference          | US FDA (Centre for Drug Eval.& Res./Off. Testing & Res.) Sept. 1997 | US FDA (Centre for Drug Eval.& Res./Off. Testing & Res.) Sept. 1997 | US FDA (Centre for Drug Eval.& Res./Off. Testing & Res.) Sept. 1997 |

## Model Applicability

Unknown features are fingerprint features in the query molecule, but not found in the training set.

1. All properties and OPS components are within expected ranges.

## Feature Contribution

### Top features for positive contribution

| Fingerprint | Bit/Smiles  | Feature Structure | Score | Carcinogen in training set |
|-------------|-------------|-------------------|-------|----------------------------|
| SCFP_6      | -1905051945 |                   | 0.561 | 3 out of 4                 |

[\*]C[C@H]1C[C@H](O)[C@@H](O)O1

| SCFP_6                                 | -1065373877 | 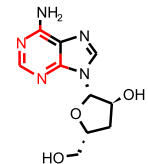<br><chem>[*][c]1:[*]:[c]([*])<br/>:n:[cH]:n:1</chem>           | 0.429  | 3 out of 5                 |
|----------------------------------------|-------------|----------------------------------------------------------------------------------------------------------------------------------------------------|--------|----------------------------|
| SCFP_6                                 | -2147171373 | <br><chem>[*]:[c]1:[*]:n:[cH]:n<br/>:[c]:1N</chem>              | 0.415  | 1 out of 1                 |
| Top Features for negative contribution |             |                                                                                                                                                    |        |                            |
| Fingerprint                            | Bit/Smiles  | Feature Structure                                                                                                                                  | Score  | Carcinogen in training set |
| SCFP_6                                 | -1519771906 | <br><chem>[*]C([*])n1:[cH]:n:[c]<br/>](:[*]):[c]:1:[*]</chem>   | -0.484 | 1 out of 7                 |
| SCFP_6                                 | -1618236862 | <br><chem>[*][C@H]1C[C@H](CO)O1<br/>C@@H1[*]</chem>            | -0.278 | 0 out of 1                 |
| SCFP_6                                 | 194135988   | <br><chem>N[c]1:n:[cH]:[*]:[c]2<br/>:[*]:[*]:n:[c]:1:2</chem> | -0.278 | 0 out of 1                 |



# Ribavirin

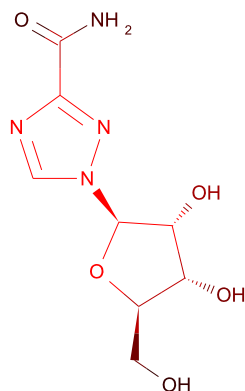

$C_8H_{12}N_4O_5$

Molecular Weight: 244.20467

ALogP: -2.745

Rotatable Bonds: 3

Acceptors: 7

Donors: 4

## Model Prediction

**Prediction: Carcinogen**

Probability: 0.695

Enrichment: 2.080

Bayesian Score: 9.565

Mahalanobis Distance: 8.604

Mahalanobis Distance p-value: 0.986

Prediction: Positive if the Bayesian score is above the estimated best cutoff value from minimizing the false positive and false negative rate.

Probability: The estimated probability that the sample is in the positive category. This assumes that the Bayesian score follows a normal distribution and is different from the prediction using a cutoff.

Enrichment: An estimate of enrichment, that is, the increased likelihood (versus random) of this sample being in the category.

Bayesian Score: The standard Laplacian-modified Bayesian score.

Mahalanobis Distance: The Mahalanobis distance (MD) is the distance to the center of the training data. The larger the MD, the less trustworthy the prediction.

Mahalanobis Distance p-value: The p-value gives the fraction of training data with an MD greater than or equal to the one for the given sample, assuming normally distributed data. The smaller the p-value, the less trustworthy the prediction. For highly non-normal X properties (e.g., fingerprints), the MD p-value is wildly inaccurate.

# TOPKAT\_Rat\_Male\_FDA\_None\_vs\_Carcinogen

## Structural Similar Compounds

| Name               | Ribavirin                                                           | Streptozocin                                                        | Ascorbic acid                                                       |
|--------------------|---------------------------------------------------------------------|---------------------------------------------------------------------|---------------------------------------------------------------------|
| Structure          |                                                                     |                                                                     |                                                                     |
| Actual Endpoint    | Carcinogen                                                          | Carcinogen                                                          | Non-Carcinogen                                                      |
| Predicted Endpoint | Carcinogen                                                          | Carcinogen                                                          | Non-Carcinogen                                                      |
| Distance           | 0.000                                                               | 0.578                                                               | 0.614                                                               |
| Reference          | US FDA (Centre for Drug Eval.& Res./Off. Testing & Res.) Sept. 1997 | US FDA (Centre for Drug Eval.& Res./Off. Testing & Res.) Sept. 1997 | US FDA (Centre for Drug Eval.& Res./Off. Testing & Res.) Sept. 1997 |

## Model Applicability

Unknown features are fingerprint features in the query molecule, but not found in the training set.

1. All properties and OPS components are within expected ranges.

## Feature Contribution

### Top features for positive contribution

| Fingerprint | Bit/Smiles | Feature Structure                   | Score | Carcinogen in training set |
|-------------|------------|-------------------------------------|-------|----------------------------|
| SCFP_6      | 599957850  | <br>[*]C([*])n1:[cH]:n:[c]([*]):n:1 | 0.712 | 3 out of 3                 |

|                                        |            |                                                                                                                                  |        |                            |
|----------------------------------------|------------|----------------------------------------------------------------------------------------------------------------------------------|--------|----------------------------|
| SCFP_6                                 | -443296553 | 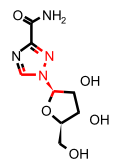<br><chem>[*]C([*])n1:[cH]:[*]:[*]:n:1</chem> | 0.653  | 4 out of 5                 |
| SCFP_6                                 | 149212520  | <br><chem>[*]n1:[*]:[*]:[c]([*]) :n:1</chem>  | 0.543  | 9 out of 15                |
| Top Features for negative contribution |            |                                                                                                                                  |        |                            |
| Fingerprint                            | Bit/Smiles | Feature Structure                                                                                                                | Score  | Carcinogen in training set |
| SCFP_6                                 | 1257084377 | <br><chem>[*]:[c](:[*])C(=O)N</chem>          | -0.436 | 4 out of 21                |
| SCFP_6                                 | -424515134 | <br><chem>[*]C([*])O</chem>                  | -0.157 | 30 out of 110              |
| SCFP_6                                 | 9          | <br><chem>[*]N([*])[*]</chem>               | -0.055 | 40 out of 132              |

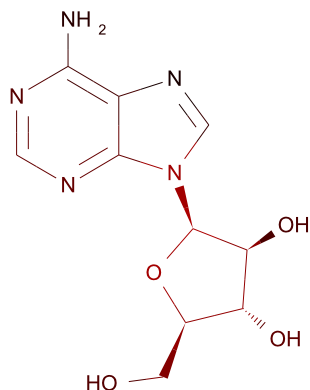

$C_{10}H_{13}N_5O_4$

Molecular Weight: 267.24132

ALogP: -1.881

Rotatable Bonds: 2

Acceptors: 8

Donors: 4

## Model Prediction

**Prediction: Multiple-Carcinogen**

Probability: 0.647

Enrichment: 1.563

Bayesian Score: 7.633

Mahalanobis Distance: 13.760

Mahalanobis Distance p-value: 0.000142

Prediction: Positive if the Bayesian score is above the estimated best cutoff value from minimizing the false positive and false negative rate.

Probability: The estimated probability that the sample is in the positive category. This assumes that the Bayesian score follows a normal distribution and is different from the prediction using a cutoff.

Enrichment: An estimate of enrichment, that is, the increased likelihood (versus random) of this sample being in the category.

Bayesian Score: The standard Laplacian-modified Bayesian score.

Mahalanobis Distance: The Mahalanobis distance (MD) is the distance to the center of the training data. The larger the MD, the less trustworthy the prediction.

Mahalanobis Distance p-value: The p-value gives the fraction of training data with an MD greater than or equal to the one for the given sample, assuming normally distributed data. The smaller the p-value, the less trustworthy the prediction. For highly non-normal X properties (e.g., fingerprints), the MD p-value is wildly inaccurate.

## Structural Similar Compounds

| Name               | Ribavirin                                                           | Streptozocin                                                        | Cimetidine                                                          |
|--------------------|---------------------------------------------------------------------|---------------------------------------------------------------------|---------------------------------------------------------------------|
| Structure          |                                                                     |                                                                     |                                                                     |
| Actual Endpoint    | Multiple-Carcinogen                                                 | Multiple-Carcinogen                                                 | Multiple-Carcinogen                                                 |
| Predicted Endpoint | Multiple-Carcinogen                                                 | Multiple-Carcinogen                                                 | Multiple-Carcinogen                                                 |
| Distance           | 0.562                                                               | 0.654                                                               | 0.966                                                               |
| Reference          | US FDA (Centre for Drug Eval.& Res./Off. Testing & Res.) Sept. 1997 | US FDA (Centre for Drug Eval.& Res./Off. Testing & Res.) Sept. 1997 | US FDA (Centre for Drug Eval.& Res./Off. Testing & Res.) Sept. 1997 |

## Model Applicability

Unknown features are fingerprint features in the query molecule, but not found in the training set.

1. All properties and OPS components are within expected ranges.

## Feature Contribution

### Top features for positive contribution

| Fingerprint | Bit/Smiles | Feature Structure                     | Score | Multiple-Carcinogen in training set |
|-------------|------------|---------------------------------------|-------|-------------------------------------|
| SCFP_8      | -188384666 | <br><chem>[*]C@H1[*]O[C@@H]1CO</chem> | 0.649 | 3 out of 3                          |

|                                        |             |                                                                                                                                                           |        |                                     |
|----------------------------------------|-------------|-----------------------------------------------------------------------------------------------------------------------------------------------------------|--------|-------------------------------------|
| SCFP_8                                 | -1065373877 | 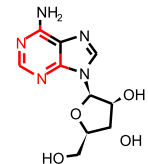<br><chem>*[c]1:[*]:[c](:[*])</chem><br><chem>:n:[cH]:n:1</chem>       | 0.649  | 3 out of 3                          |
| SCFP_8                                 | -1715619483 | <br><chem>*[C@@H]1O[C@H](CO)[</chem><br><chem>C@@H](O)[C@H]1[*]</chem> | 0.553  | 2 out of 2                          |
| Top Features for negative contribution |             |                                                                                                                                                           |        |                                     |
| Fingerprint                            | Bit/Smiles  | Feature Structure                                                                                                                                         | Score  | Multiple-Carcinogen in training set |
| SCFP_8                                 | 112554633   | <br><chem>*[c](:[*]):[c]1:n:[</chem><br><chem>*]:[*]:[c]:1:[*]</chem>  | -0.292 | 3 out of 12                         |
| SCFP_8                                 | 8           | <br><chem>[*]:n:[*]</chem>                                            | -0.154 | 12 out of 39                        |
| SCFP_8                                 | 276193969   | <br><chem>*[C@@H]1[*][*][C@H]</chem><br><chem>([*])O1</chem>         | -0.072 | 5 out of 15                         |



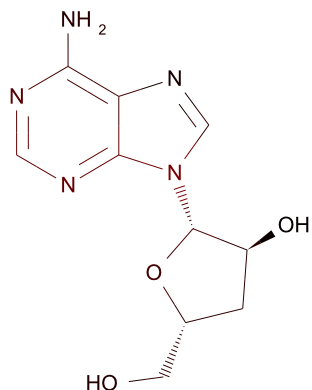

$C_{10}H_{13}N_5O_3$

Molecular Weight: 251.24191

ALogP: -1.308

Rotatable Bonds: 2

Acceptors: 7

Donors: 3

## Model Prediction

**Prediction: Multiple-Carcinogen**

Probability: 0.596

Enrichment: 1.440

Bayesian Score: 5.549

Mahalanobis Distance: 15.349

Mahalanobis Distance p-value: 5.22e-006

Prediction: Positive if the Bayesian score is above the estimated best cutoff value from minimizing the false positive and false negative rate.

Probability: The estimated probability that the sample is in the positive category. This assumes that the Bayesian score follows a normal distribution and is different from the prediction using a cutoff.

Enrichment: An estimate of enrichment, that is, the increased likelihood (versus random) of this sample being in the category.

Bayesian Score: The standard Laplacian-modified Bayesian score.

Mahalanobis Distance: The Mahalanobis distance (MD) is the distance to the center of the training data. The larger the MD, the less trustworthy the prediction.

Mahalanobis Distance p-value: The p-value gives the fraction of training data with an MD greater than or equal to the one for the given sample, assuming normally distributed data. The smaller the p-value, the less trustworthy the prediction. For highly non-normal X properties (e.g., fingerprints), the MD p-value is wildly inaccurate.

## Structural Similar Compounds

| Name               | Ribavirin                                                           | Dacarbazine                                                         | Monocrotaline                                                       |
|--------------------|---------------------------------------------------------------------|---------------------------------------------------------------------|---------------------------------------------------------------------|
| Structure          |                                                                     |                                                                     |                                                                     |
| Actual Endpoint    | Multiple-Carcinogen                                                 | Multiple-Carcinogen                                                 | Single-Carcinogen                                                   |
| Predicted Endpoint | Multiple-Carcinogen                                                 | Multiple-Carcinogen                                                 | Single-Carcinogen                                                   |
| Distance           | 0.709                                                               | 0.777                                                               | 0.822                                                               |
| Reference          | US FDA (Centre for Drug Eval.& Res./Off. Testing & Res.) Sept. 1997 | US FDA (Centre for Drug Eval.& Res./Off. Testing & Res.) Sept. 1997 | US FDA (Centre for Drug Eval.& Res./Off. Testing & Res.) Sept. 1997 |

## Model Applicability

Unknown features are fingerprint features in the query molecule, but not found in the training set.

1. All properties and OPS components are within expected ranges.

## Feature Contribution

### Top features for positive contribution

| Fingerprint | Bit/Smiles | Feature Structure                     | Score | Multiple-Carcinogen in training set |
|-------------|------------|---------------------------------------|-------|-------------------------------------|
| SCFP_8      | -188384666 | <br><chem>[*]C@H1[*]O[C@@H]1CO</chem> | 0.649 | 3 out of 3                          |

|                                        |             |                                                                                                                                                               |        |                                     |
|----------------------------------------|-------------|---------------------------------------------------------------------------------------------------------------------------------------------------------------|--------|-------------------------------------|
| SCFP_8                                 | -1065373877 | 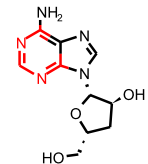<br><chem>[*][c]1:[*]:[c](:[*])</chem><br><chem>:n:[cH]:n:1</chem>         | 0.649  | 3 out of 3                          |
| SCFP_8                                 | -1181430618 | <br><chem>[*]:n:[cH]:n:[*]</chem>                                          | 0.453  | 4 out of 6                          |
| Top Features for negative contribution |             |                                                                                                                                                               |        |                                     |
| Fingerprint                            | Bit/Smiles  | Feature Structure                                                                                                                                             | Score  | Multiple-Carcinogen in training set |
| SCFP_8                                 | 112554633   | <br><chem>[*][c](:[*]):[c]1:n:[*]</chem><br><chem>[*]:[*]:[c]:1:[*]</chem> | -0.292 | 3 out of 12                         |
| SCFP_8                                 | 8           | <br><chem>[*]:n:[*]</chem>                                               | -0.154 | 12 out of 39                        |
| SCFP_8                                 | -1272798659 | <br><chem>[*][C@@H]1[*][*][C@@H]1[*]C1</chem>                            | -0.100 | 16 out of 49                        |





# Ribavirin

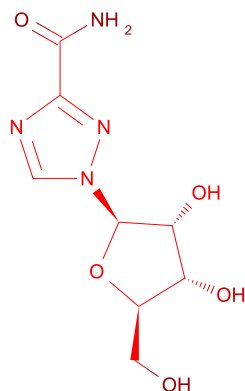

$C_8H_{12}N_4O_5$

Molecular Weight: 244.20467

ALogP: -2.745

Rotatable Bonds: 3

Acceptors: 7

Donors: 4

## Model Prediction

**Prediction: Multiple-Carcinogen**

Probability: 0.733

Enrichment: 1.771

Bayesian Score: 12.770

Mahalanobis Distance: 8.323

Mahalanobis Distance p-value: 0.587

Prediction: Positive if the Bayesian score is above the estimated best cutoff value from minimizing the false positive and false negative rate.

Probability: The estimated probability that the sample is in the positive category. This assumes that the Bayesian score follows a normal distribution and is different from the prediction using a cutoff.

Enrichment: An estimate of enrichment, that is, the increased likelihood (versus random) of this sample being in the category.

Bayesian Score: The standard Laplacian-modified Bayesian score.

Mahalanobis Distance: The Mahalanobis distance (MD) is the distance to the center of the training data. The larger the MD, the less trustworthy the prediction.

Mahalanobis Distance p-value: The p-value gives the fraction of training data with an MD greater than or equal to the one for the given sample, assuming normally distributed data. The smaller the p-value, the less trustworthy the prediction. For highly non-normal X properties (e.g., fingerprints), the MD p-value is wildly inaccurate.

# TOPKAT\_Rat\_Male\_FDA\_Single\_vs\_Multiple

## Structural Similar Compounds

| Name               | Ribavirin                                                           | Streptozocin                                                        | Azaserine                                                           |
|--------------------|---------------------------------------------------------------------|---------------------------------------------------------------------|---------------------------------------------------------------------|
| Structure          |                                                                     |                                                                     |                                                                     |
| Actual Endpoint    | Multiple-Carcinogen                                                 | Multiple-Carcinogen                                                 | Single-Carcinogen                                                   |
| Predicted Endpoint | Multiple-Carcinogen                                                 | Multiple-Carcinogen                                                 | Single-Carcinogen                                                   |
| Distance           | 0.000                                                               | 0.631                                                               | 0.902                                                               |
| Reference          | US FDA (Centre for Drug Eval.& Res./Off. Testing & Res.) Sept. 1997 | US FDA (Centre for Drug Eval.& Res./Off. Testing & Res.) Sept. 1997 | US FDA (Centre for Drug Eval.& Res./Off. Testing & Res.) Sept. 1997 |

## Model Applicability

Unknown features are fingerprint features in the query molecule, but not found in the training set.

1. All properties and OPS components are within expected ranges.

## Feature Contribution

### Top features for positive contribution

| Fingerprint | Bit/Smiles | Feature Structure | Score | Multiple-Carcinogen in training set |
|-------------|------------|-------------------|-------|-------------------------------------|
| SCFP_8      | -188384666 |                   | 0.649 | 3 out of 3                          |

|                                        |             |                                                                                                                                          |        |                                     |
|----------------------------------------|-------------|------------------------------------------------------------------------------------------------------------------------------------------|--------|-------------------------------------|
| SCFP_8                                 | -1715619483 | 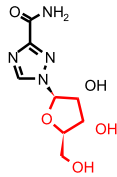<br><chem>[*]C@@H1O[C@H](CO)[C@@H](O)[C@H]1[*]</chem> | 0.553  | 2 out of 2                          |
| SCFP_8                                 | -1486266146 | <br><chem>[*]C[C@H]1O[C@@H]([*])C@@H(O)[C@H]1O</chem> | 0.553  | 2 out of 2                          |
| Top Features for negative contribution |             |                                                                                                                                          |        |                                     |
| Fingerprint                            | Bit/Smiles  | Feature Structure                                                                                                                        | Score  | Multiple-Carcinogen in training set |
| SCFP_8                                 | -443296553  | <br><chem>[*]C([*])n1:[cH]:[*]:[*]:n:1</chem>         | -0.204 | 1 out of 4                          |
| SCFP_8                                 | 8           | <br><chem>[*]:n:[*]</chem>                          | -0.154 | 12 out of 39                        |
| SCFP_8                                 | 276193969   | <br><chem>[*]C@@H1[*]C@H([*])O1</chem>              | -0.072 | 5 out of 15                         |



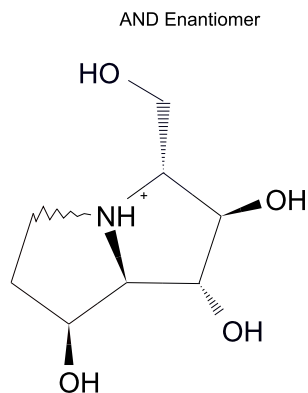

$C_8H_{16}NO_4$

Molecular Weight: 190.21693

ALogP: -3.556

Rotatable Bonds: 1

Acceptors: 4

Donors: 5

## Model Prediction

Prediction: Mild

Probability: 0.225

Enrichment: 0.612

Bayesian Score: -4.500

Mahalanobis Distance: 10.706

Mahalanobis Distance p-value: 0.0029

Prediction: Positive if the Bayesian score is above the estimated best cutoff value from minimizing the false positive and false negative rate.

Probability: The estimated probability that the sample is in the positive category. This assumes that the Bayesian score follows a normal distribution and is different from the prediction using a cutoff.

Enrichment: An estimate of enrichment, that is, the increased likelihood (versus random) of this sample being in the category.

Bayesian Score: The standard Laplacian-modified Bayesian score.

Mahalanobis Distance: The Mahalanobis distance (MD) is the distance to the center of the training data. The larger the MD, the less trustworthy the prediction.

Mahalanobis Distance p-value: The p-value gives the fraction of training data with an MD greater than or equal to the one for the given sample, assuming normally distributed data. The smaller the p-value, the less trustworthy the prediction. For highly non-normal X properties (e.g., fingerprints), the MD p-value is wildly inaccurate.

## Structural Similar Compounds

| Name               | Ethanol, 2,2',2'',2'''-silanetetrayltetakis-                                                                                                       | Propionamidine, 2,2'-azobis(2-methyl-, dihydrochloride                                                                                                                                                           | Glycerol                                                                                                                                          |
|--------------------|----------------------------------------------------------------------------------------------------------------------------------------------------|------------------------------------------------------------------------------------------------------------------------------------------------------------------------------------------------------------------|---------------------------------------------------------------------------------------------------------------------------------------------------|
| Structure          |                                                                                                                                                    |                                                                                                                                                                                                                  |                                                                                                                                                   |
| Actual Endpoint    | Mild                                                                                                                                               | Mild                                                                                                                                                                                                             | Mild                                                                                                                                              |
| Predicted Endpoint | Mild                                                                                                                                               | Mild                                                                                                                                                                                                             | Mild                                                                                                                                              |
| Distance           | 0.930                                                                                                                                              | 0.945                                                                                                                                                                                                            | 0.958                                                                                                                                             |
| Reference          | 85JCAE "Prehled Prumyslove Toxikologie; Organické Latky," Marhold, J., Prague, Czechoslovakia, Avicenum, 1986 Volume(issue)/page/year: -,1232,1986 | EPASR* United States Environmental Protection Agency, Office of Pesticides and Toxic Substances. (U.S. Environmental Protection Agency, 401 M St., SW, Washington, DC 20460) History unknown. Volume(issue)/page | 85JCAE "Prehled Prumyslove Toxikologie; Organické Latky," Marhold, J., Prague, Czechoslovakia, Avicenum, 1986 Volume(issue)/page/year: -,207,1986 |

## Model Applicability

Unknown features are fingerprint features in the query molecule, but not found in the training set.

1. OPS PC1 out of range. Value: -3.8188. Training min, max, SD, explained variance: -3.7938, 19.107, 3.41, 0.1570.
2. Unknown FCFP\_2 feature: 10: [\*][NH+]([\*])[\*]
3. Unknown FCFP\_2 feature: -1853714334: [\*][C@@H]1[\*][\*][C@H]2[\*][\*]C[NH+]12
4. Unknown FCFP\_2 feature: -1817836174: [\*][C@H]1[\*][\*][NH+]2[\*][\*][C@H]([\*])C12
5. Unknown FCFP\_2 feature: 1155241219: [\*][NH+]1[\*][\*]CC1

## Feature Contribution

| Top features for positive contribution |            |                   |       |                                 |
|----------------------------------------|------------|-------------------|-------|---------------------------------|
| Fingerprint                            | Bit/Smiles | Feature Structure | Score | Moderate_Severe in training set |
|                                        |            |                   |       |                                 |

| FCFP_12                                | -1272798659 | 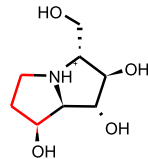<br><chem>[*][C@@H]1[*][*]CC1</chem>               | 0.204  | 227 out of 513                     |
|----------------------------------------|-------------|---------------------------------------------------------------------------------------------------------------------------------------|--------|------------------------------------|
| FCFP_12                                | -1043250487 | <br><chem>[*][C@@H]1[*][*][C@H]([*])[C@H]1O</chem> | 0.060  | 15 out of 39                       |
| Top Features for negative contribution |             |                                                                                                                                       |        |                                    |
| Fingerprint                            | Bit/Smiles  | Feature Structure                                                                                                                     | Score  | Moderate_Severe<br>in training set |
| FCFP_12                                | -1272709286 | <br><chem>[*]C([*])CO</chem>                       | -0.475 | 18 out of 82                       |
| FCFP_12                                | 3           | <br><chem>[*]O</chem>                             | -0.234 | 58 out of 204                      |
| FCFP_12                                | 1070061035  | <br><chem>[*]C([*])O</chem>                      | -0.144 | 47 out of 151                      |

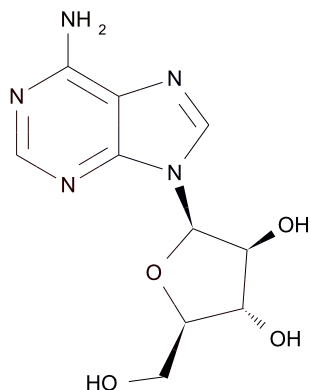

C<sub>10</sub>H<sub>13</sub>N<sub>5</sub>O<sub>4</sub>

Molecular Weight: 267.24132

ALogP: -1.881

Rotatable Bonds: 2

Acceptors: 8

Donors: 4

## Model Prediction

Prediction: Mild

Probability: 0.201

Enrichment: 0.545

Bayesian Score: -5.137

Mahalanobis Distance: 10.534

Mahalanobis Distance p-value: 0.00545

Prediction: Positive if the Bayesian score is above the estimated best cutoff value from minimizing the false positive and false negative rate.

Probability: The estimated probability that the sample is in the positive category. This assumes that the Bayesian score follows a normal distribution and is different from the prediction using a cutoff.

Enrichment: An estimate of enrichment, that is, the increased likelihood (versus random) of this sample being in the category.

Bayesian Score: The standard Laplacian-modified Bayesian score.

Mahalanobis Distance: The Mahalanobis distance (MD) is the distance to the center of the training data. The larger the MD, the less trustworthy the prediction.

Mahalanobis Distance p-value: The p-value gives the fraction of training data with an MD greater than or equal to the one for the given sample, assuming normally distributed data. The smaller the p-value, the less trustworthy the prediction. For highly non-normal X properties (e.g., fingerprints), the MD p-value is wildly inaccurate.

## Structural Similar Compounds

| Name               | Citric acid                                                                                                                                       | Benzene-1,3-dicarboxylic acid, 5-sulfo-                                                                                                            | 1,5-Naphthalenedisulfonic acid, 2-amino-                                                                                                           |
|--------------------|---------------------------------------------------------------------------------------------------------------------------------------------------|----------------------------------------------------------------------------------------------------------------------------------------------------|----------------------------------------------------------------------------------------------------------------------------------------------------|
| Structure          |                                                                                                                                                   |                                                                                                                                                    |                                                                                                                                                    |
| Actual Endpoint    | Mild                                                                                                                                              | Mild                                                                                                                                               | Mild                                                                                                                                               |
| Predicted Endpoint | Mild                                                                                                                                              | Mild                                                                                                                                               | Mild                                                                                                                                               |
| Distance           | 0.767                                                                                                                                             | 0.807                                                                                                                                              | 0.810                                                                                                                                              |
| Reference          | 85JCAE "Prehled Prumyslove Toxikologie; Organické Latky," Marhold, J., Prague, Czechoslovakia, Avicenum, 1986 Volume(issue)/page/year: -,658,1986 | 85JCAE "Prehled Prumyslove Toxikologie; Organické Latky," Marhold, J., Prague, Czechoslovakia, Avicenum, 1986 Volume(issue)/page/year: -,1056,1986 | 85JCAE "Prehled Prumyslove Toxikologie; Organické Latky," Marhold, J., Prague, Czechoslovakia, Avicenum, 1986 Volume(issue)/page/year: -,1058,1986 |

## Model Applicability

Unknown features are fingerprint features in the query molecule, but not found in the training set.

1. All properties and OPS components are within expected ranges.
2. Unknown FCFP\_2 feature: -1564473960: [\*]n1:[\*]:[\*]:[c]([\*]):[c]:1:n:[\*]
3. Unknown FCFP\_2 feature: 1315416442: [\*][C@H]1[\*][\*]O[C@H]1n([\*]):[\*]

## Feature Contribution

### Top features for positive contribution

| Fingerprint | Bit/Smiles | Feature Structure | Score | Moderate_Severe in training set |
|-------------|------------|-------------------|-------|---------------------------------|
|             |            |                   |       |                                 |

|                                        |             |                                                                                                                                                              |        |                                    |
|----------------------------------------|-------------|--------------------------------------------------------------------------------------------------------------------------------------------------------------|--------|------------------------------------|
| FCFP_12                                | -1151884458 | 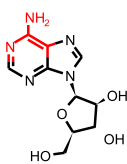<br><chem>[*]:n:[c](N):[c](:[*])</chem>                                   | 0.385  | 1 out of 1                         |
| FCFP_12                                | 76292238    | <br><chem>[*]:[c]1:[*]:n:[cH]:n</chem><br><chem>: [c]:1N</chem>           | 0.385  | 1 out of 1                         |
| FCFP_12                                | -2091721556 | <br><chem>[*]C@H1[*]O[C@@H</chem><br><chem>]1CO</chem>                    | 0.365  | 2 out of 3                         |
| Top Features for negative contribution |             |                                                                                                                                                              |        |                                    |
| Fingerprint                            | Bit/Smiles  | Feature Structure                                                                                                                                            | Score  | Moderate_Severe<br>in training set |
| FCFP_12                                | -1272709286 | <br><chem>[*]C([*])CO</chem>                                             | -0.475 | 18 out of 82                       |
| FCFP_12                                | 178336375   | <br><chem>[*][c](:[*]):[c]1:n:[</chem><br><chem>*]:[*]:[c]:1:[*]</chem> | -0.413 | 3 out of 14                        |

|         |            |                                                                                                                    |        |             |
|---------|------------|--------------------------------------------------------------------------------------------------------------------|--------|-------------|
| FCFP_12 | 1069584379 | 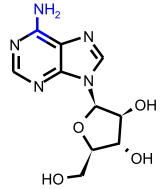<br><chem>[*]:[c](:[*])N</chem> | -0.360 | 8 out of 33 |
|---------|------------|--------------------------------------------------------------------------------------------------------------------|--------|-------------|



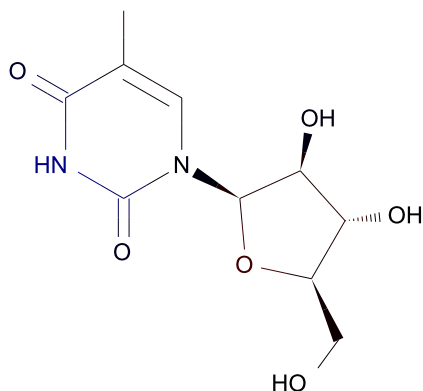

$C_{10}H_{14}N_2O_6$

Molecular Weight: 258.22795

ALogP: -2.005

Rotatable Bonds: 2

Acceptors: 6

Donors: 4

## Model Prediction

Prediction: Mild

Probability: 0.165

Enrichment: 0.448

Bayesian Score: -6.135

Mahalanobis Distance: 14.296

Mahalanobis Distance p-value: 3.17e-012

Prediction: Positive if the Bayesian score is above the estimated best cutoff value from minimizing the false positive and false negative rate.

Probability: The estimated probability that the sample is in the positive category. This assumes that the Bayesian score follows a normal distribution and is different from the prediction using a cutoff.

Enrichment: An estimate of enrichment, that is, the increased likelihood (versus random) of this sample being in the category.

Bayesian Score: The standard Laplacian-modified Bayesian score.

Mahalanobis Distance: The Mahalanobis distance (MD) is the distance to the center of the training data. The larger the MD, the less trustworthy the prediction.

Mahalanobis Distance p-value: The p-value gives the fraction of training data with an MD greater than or equal to the one for the given sample, assuming normally distributed data. The smaller the p-value, the less trustworthy the prediction. For highly non-normal X properties (e.g., fingerprints), the MD p-value is wildly inaccurate.

## Structural Similar Compounds

| Name               | Propionamidine, 2,2'-azobis(2-methyl-, dihydrochloride                                                                                                                                                           | Glutamic acid, N-(p-(methylamino)benzoyl)-, sodium salt                                                                                                        | Citric acid                                                                                                                                       |
|--------------------|------------------------------------------------------------------------------------------------------------------------------------------------------------------------------------------------------------------|----------------------------------------------------------------------------------------------------------------------------------------------------------------|---------------------------------------------------------------------------------------------------------------------------------------------------|
| Structure          |                                                                                                                                                                                                                  |                                                                                                                                                                |                                                                                                                                                   |
| Actual Endpoint    | Mild                                                                                                                                                                                                             | Mild                                                                                                                                                           | Mild                                                                                                                                              |
| Predicted Endpoint | Mild                                                                                                                                                                                                             | Mild                                                                                                                                                           | Mild                                                                                                                                              |
| Distance           | 0.780                                                                                                                                                                                                            | 0.805                                                                                                                                                          | 0.808                                                                                                                                             |
| Reference          | EPASR* United States Environmental Protection Agency, Office of Pesticides and Toxic Substances. (U.S. Environmental Protection Agency, 401 M St., SW, Washington, DC 20460) History unknown. Volume(issue)/page | FCTOD7 Food and Chemical Toxicology. (Pergamon Press Inc., Maxwell House, Fairview Park, Elmsford, NY 10523) V.20- 1982- Volume(issue)/page/year: 20,563, 1982 | 85JCAE "Prehled Prumyslove Toxikologie; Organické Latky," Marhold, J., Prague, Czechoslovakia, Avicenum, 1986 Volume(issue)/page/year: -,658,1986 |

## Model Applicability

Unknown features are fingerprint features in the query molecule, but not found in the training set.

1. All properties and OPS components are within expected ranges.

## Feature Contribution

### Top features for positive contribution

| Fingerprint | Bit/Smiles | Feature Structure | Score | Moderate Severe in training set |
|-------------|------------|-------------------|-------|---------------------------------|
|-------------|------------|-------------------|-------|---------------------------------|

|                                        |             |                                                                                                                                     |        |                                 |
|----------------------------------------|-------------|-------------------------------------------------------------------------------------------------------------------------------------|--------|---------------------------------|
| FCFP_12                                | 436886043   | 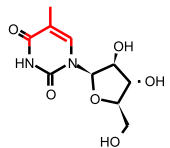<br><chem>[*]C=C(C(C)C)C(=[*])[*]</chem>         | 0.503  | 68 out of 113                   |
| FCFP_12                                | 699500266   | <br><chem>[*][C@H]1[*][*]O[C@H]1N([*])[*]</chem> | 0.441  | 14 out of 24                    |
| FCFP_12                                | -2091721556 | <br><chem>[*][C@H]1[*][*]O[C@@H]1CO</chem>       | 0.365  | 2 out of 3                      |
| Top Features for negative contribution |             |                                                                                                                                     |        |                                 |
| Fingerprint                            | Bit/Smiles  | Feature Structure                                                                                                                   | Score  | Moderate_Severe in training set |
| FCFP_12                                | -885550502  | <br><chem>[*]C(=[*])NC(=[*])[*]</chem>          | -1.050 | 2 out of 21                     |
| FCFP_12                                | 566058135   | <br><chem>[*]NC(=O)C(=[*])[*]</chem>           | -0.909 | 1 out of 11                     |

|         |             |                                                                                                                        |        |            |
|---------|-------------|------------------------------------------------------------------------------------------------------------------------|--------|------------|
| FCFP_12 | -1986098826 | 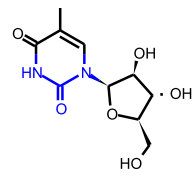<br><chem>[*]NC(=O)N([*])[*]</chem> | -0.733 | 0 out of 3 |
|---------|-------------|------------------------------------------------------------------------------------------------------------------------|--------|------------|

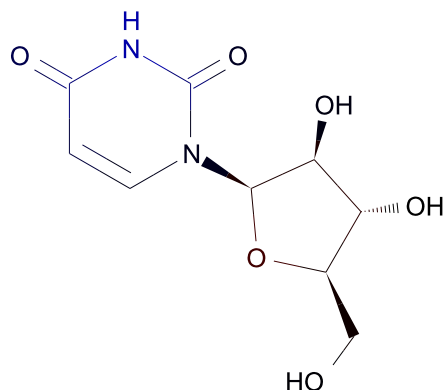

$C_9H_{12}N_2O_6$

Molecular Weight: 244.20137

ALogP: -2.451

Rotatable Bonds: 2

Acceptors: 6

Donors: 4

## Model Prediction

Prediction: Mild

Probability: 0.131

Enrichment: 0.356

Bayesian Score: -7.203

Mahalanobis Distance: 13.737

Mahalanobis Distance p-value: 1.84e-010

Prediction: Positive if the Bayesian score is above the estimated best cutoff value from minimizing the false positive and false negative rate.

Probability: The estimated probability that the sample is in the positive category. This assumes that the Bayesian score follows a normal distribution and is different from the prediction using a cutoff.

Enrichment: An estimate of enrichment, that is, the increased likelihood (versus random) of this sample being in the category.

Bayesian Score: The standard Laplacian-modified Bayesian score.

Mahalanobis Distance: The Mahalanobis distance (MD) is the distance to the center of the training data. The larger the MD, the less trustworthy the prediction.

Mahalanobis Distance p-value: The p-value gives the fraction of training data with an MD greater than or equal to the one for the given sample, assuming normally distributed data. The smaller the p-value, the less trustworthy the prediction. For highly non-normal X properties (e.g., fingerprints), the MD p-value is wildly inaccurate.

## Structural Similar Compounds

| Name               | Citric acid                                                                                                                                       | Propionamidine, 2,2'-azobis(2-methyl-, dihydrochloride                                                                                                                                                          | Benzenesulfonic acid, 2,4-diamino-                                                                                                                                                                               |
|--------------------|---------------------------------------------------------------------------------------------------------------------------------------------------|-----------------------------------------------------------------------------------------------------------------------------------------------------------------------------------------------------------------|------------------------------------------------------------------------------------------------------------------------------------------------------------------------------------------------------------------|
| Structure          |                                                                                                                                                   |                                                                                                                                                                                                                 |                                                                                                                                                                                                                  |
| Actual Endpoint    | Mild                                                                                                                                              | Mild                                                                                                                                                                                                            | Moderate_Severe                                                                                                                                                                                                  |
| Predicted Endpoint | Mild                                                                                                                                              | Mild                                                                                                                                                                                                            | Mild                                                                                                                                                                                                             |
| Distance           | 0.762                                                                                                                                             | 0.818                                                                                                                                                                                                           | 0.821                                                                                                                                                                                                            |
| Reference          | 85JCAE "Prehled Prumyslove Toxikologie; Organické Latky," Marhold, J., Prague, Czechoslovakia, Avicenum, 1986 Volume(issue)/page/year: -,658,1986 | EPASR* United States Environmental Protection Agency, Office of Pesticides and Toxic Substances. (U.S. Environmental Protection Agency, 401 M St., SW, Washington, DC 20460) History unknown. Volume(issue)/pag | 28ZPAK "Sbornik Vysledku Toxikologickeho Vysetreni Latek A Pripravku," Marhold, J.V., Institut Pro Vychovu Vedoucich Pracovniku Chemickeho Prumyслу Praha, Czechoslovakia, 1972 Volume(issue)/page/year: -,180,1 |

## Model Applicability

Unknown features are fingerprint features in the query molecule, but not found in the training set.

1. All properties and OPS components are within expected ranges.

## Feature Contribution

### Top features for positive contribution

| Fingerprint | Bit/Smiles | Feature Structure | Score | Moderate_Severe in training set |
|-------------|------------|-------------------|-------|---------------------------------|
|-------------|------------|-------------------|-------|---------------------------------|

| FCFP_12                                | 699500266   | 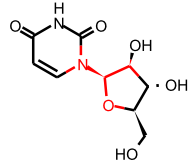<br><chem>[*][C@H]1[*][*]O[C@H]1N(*)[*]</chem> | 0.441  | 14 out of 24                       |
|----------------------------------------|-------------|-----------------------------------------------------------------------------------------------------------------------------------|--------|------------------------------------|
| FCFP_12                                | -2091721556 | <br><chem>[*][C@H]1[*][*]O[C@@H]1CO</chem>     | 0.365  | 2 out of 3                         |
| FCFP_12                                | 451847724   | <br><chem>[*]\C=C/C(=[*])[*]</chem>            | 0.257  | 101 out of 216                     |
| Top Features for negative contribution |             |                                                                                                                                   |        |                                    |
| Fingerprint                            | Bit/Smiles  | Feature Structure                                                                                                                 | Score  | Moderate_Severe<br>in training set |
| FCFP_12                                | -885550502  | <br><chem>[*]C(=[*])NC(=[*])[*]</chem>        | -1.050 | 2 out of 21                        |
| FCFP_12                                | 566058135   | <br><chem>[*]NC(=O)C(=[*])[*]</chem>         | -0.909 | 1 out of 11                        |

|         |             |                                                                                                                        |        |            |
|---------|-------------|------------------------------------------------------------------------------------------------------------------------|--------|------------|
| FCFP_12 | -1986098826 | 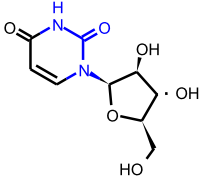<br><chem>[*]NC(=O)N([*])[*]</chem> | -0.733 | 0 out of 3 |
|---------|-------------|------------------------------------------------------------------------------------------------------------------------|--------|------------|

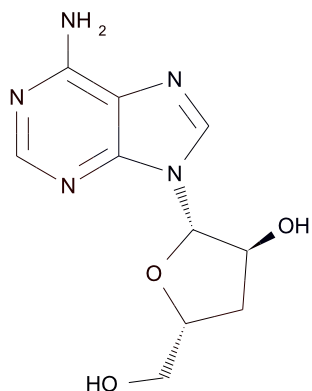
 $C_{10}H_{13}N_5O_3$ 

Molecular Weight: 251.24191

ALogP: -1.308

Rotatable Bonds: 2

Acceptors: 7

Donors: 3

## Model Prediction

Prediction: Mild

Probability: 0.208

Enrichment: 0.566

Bayesian Score: -4.933

Mahalanobis Distance: 9.932

Mahalanobis Distance p-value: 0.0366

Prediction: Positive if the Bayesian score is above the estimated best cutoff value from minimizing the false positive and false negative rate.

Probability: The estimated probability that the sample is in the positive category. This assumes that the Bayesian score follows a normal distribution and is different from the prediction using a cutoff.

Enrichment: An estimate of enrichment, that is, the increased likelihood (versus random) of this sample being in the category.

Bayesian Score: The standard Laplacian-modified Bayesian score.

Mahalanobis Distance: The Mahalanobis distance (MD) is the distance to the center of the training data. The larger the MD, the less trustworthy the prediction.

Mahalanobis Distance p-value: The p-value gives the fraction of training data with an MD greater than or equal to the one for the given sample, assuming normally distributed data. The smaller the p-value, the less trustworthy the prediction. For highly non-normal X properties (e.g., fingerprints), the MD p-value is wildly inaccurate.

## Structural Similar Compounds

| Name               | C.I. Fluorescent Brightening Agent 24                                                                     | Glutamic acid, N-(p-(methylamino)benzoyl)-, sodium salt                                                                                                       | Benzene-1,3-dicarboxylic acid, 5-sulfo-                                                                                                            |
|--------------------|-----------------------------------------------------------------------------------------------------------|---------------------------------------------------------------------------------------------------------------------------------------------------------------|----------------------------------------------------------------------------------------------------------------------------------------------------|
| Structure          |                                                                                                           |                                                                                                                                                               |                                                                                                                                                    |
| Actual Endpoint    | Mild                                                                                                      | Mild                                                                                                                                                          | Mild                                                                                                                                               |
| Predicted Endpoint | Mild                                                                                                      | Mild                                                                                                                                                          | Mild                                                                                                                                               |
| Distance           | 0.734                                                                                                     | 0.738                                                                                                                                                         | 0.741                                                                                                                                              |
| Reference          | MVCRB3 MVC-Report. (Stockholm, Sweden) No.1-2, 1972-73. Discontinued. Volume(issue)/page/year: 2,193,1973 | FCTOD7 Food and Chemical Toxicology. (Pergamon Press Inc., Maxwell House, Fairview Park, Elmsford, NY 10523) V.20- 1982- Volume(issue)/page/year: 20,563,1982 | 85JCAE "Prehled Prumyslove Toxikologie; Organické Latky," Marhold, J., Prague, Czechoslovakia, Avicenum, 1986 Volume(issue)/page/year: -,1056,1986 |

## Model Applicability

Unknown features are fingerprint features in the query molecule, but not found in the training set.

1. All properties and OPS components are within expected ranges.
2. Unknown FCFP\_2 feature: -1564473960: [\*]n1:[\*]:[\*]:[c](:[\*]):[c]:1:n:[\*]
3. Unknown FCFP\_2 feature: 1315416442: [\*][C@H]1[\*][\*]O[C@H]1n(:[\*]):[\*]

## Feature Contribution

### Top features for positive contribution

| Fingerprint | Bit/Smiles | Feature Structure | Score | Moderate Severe in training set |
|-------------|------------|-------------------|-------|---------------------------------|
|-------------|------------|-------------------|-------|---------------------------------|

|                                        |             |                                                                                                                                                             |        |                                    |
|----------------------------------------|-------------|-------------------------------------------------------------------------------------------------------------------------------------------------------------|--------|------------------------------------|
| FCFP_12                                | 76292238    | 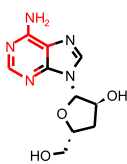<br><chem>[*]:[c]1:[*]:n:[cH]:n</chem><br><chem>: [c]:1N</chem>          | 0.385  | 1 out of 1                         |
| FCFP_12                                | -1151884458 | <br><chem>[*]:n:[c](N):[c](:[*])</chem><br><chem>):[*]</chem>            | 0.385  | 1 out of 1                         |
| FCFP_12                                | -2091721556 | <br><chem>[*]C@H1[*]O[C@@H</chem><br><chem>]1CO</chem>                   | 0.365  | 2 out of 3                         |
| Top Features for negative contribution |             |                                                                                                                                                             |        |                                    |
| Fingerprint                            | Bit/Smiles  | Feature Structure                                                                                                                                           | Score  | Moderate_Severe<br>in training set |
| FCFP_12                                | -1272709286 | <br><chem>[*]C([*])CO</chem>                                            | -0.475 | 18 out of 82                       |
| FCFP_12                                | 178336375   | <br><chem>[*][c](:[*]):[c]1:n:[</chem><br><chem>*)[*]:[c]:1:[*]</chem> | -0.413 | 3 out of 14                        |



|         |            |                                                                                                                                                                                                                                                                                                                |        |             |
|---------|------------|----------------------------------------------------------------------------------------------------------------------------------------------------------------------------------------------------------------------------------------------------------------------------------------------------------------|--------|-------------|
| FCFP_12 | 1069584379 | 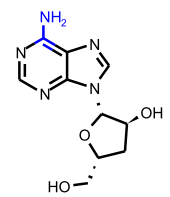 <p>Chemical structure showing a 1,3,4-oxadiazole ring with an amino group (NH<sub>2</sub>) at position 2, and two hydroxymethyl groups (CH<sub>2</sub>OH) at positions 5 and 6. The amino group is highlighted in blue.</p> | -0.360 | 8 out of 33 |
|---------|------------|----------------------------------------------------------------------------------------------------------------------------------------------------------------------------------------------------------------------------------------------------------------------------------------------------------------|--------|-------------|

[\*]:[c](:[\*])N

# Ribavirin

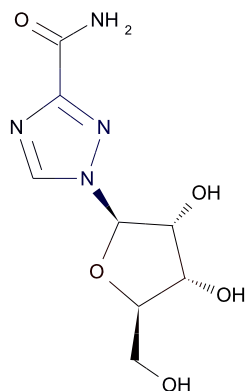

$C_8H_{12}N_4O_5$

Molecular Weight: 244.20467

ALogP: -2.745

Rotatable Bonds: 3

Acceptors: 7

Donors: 4

## Model Prediction

Prediction: Mild

Probability: 0.157

Enrichment: 0.425

Bayesian Score: -6.393

Mahalanobis Distance: 10.379

Mahalanobis Distance p-value: 0.00931

Prediction: Positive if the Bayesian score is above the estimated best cutoff value from minimizing the false positive and false negative rate.

Probability: The estimated probability that the sample is in the positive category. This assumes that the Bayesian score follows a normal distribution and is different from the prediction using a cutoff.

Enrichment: An estimate of enrichment, that is, the increased likelihood (versus random) of this sample being in the category.

Bayesian Score: The standard Laplacian-modified Bayesian score.

Mahalanobis Distance: The Mahalanobis distance (MD) is the distance to the center of the training data. The larger the MD, the less trustworthy the prediction.

Mahalanobis Distance p-value: The p-value gives the fraction of training data with an MD greater than or equal to the one for the given sample, assuming normally distributed data. The smaller the p-value, the less trustworthy the prediction. For highly non-normal X properties (e.g., fingerprints), the MD p-value is wildly inaccurate.

# TOPKAT\_Skin\_Irritancy\_Mild\_vs\_Moderate\_Severe

## Structural Similar Compounds

| Name               | Citric acid                                                                                                                                        | p-Benzenedisulfonic acid, 2-amino-                                                                                                                  | Benzene-1,3-dicarboxylic acid, 5-sulfo-                                                                                                             |
|--------------------|----------------------------------------------------------------------------------------------------------------------------------------------------|-----------------------------------------------------------------------------------------------------------------------------------------------------|-----------------------------------------------------------------------------------------------------------------------------------------------------|
| Structure          |                                                                                                                                                    |                                                                                                                                                     |                                                                                                                                                     |
| Actual Endpoint    | Mild                                                                                                                                               | Mild                                                                                                                                                | Mild                                                                                                                                                |
| Predicted Endpoint | Mild                                                                                                                                               | Mild                                                                                                                                                | Mild                                                                                                                                                |
| Distance           | 0.675                                                                                                                                              | 0.793                                                                                                                                               | 0.811                                                                                                                                               |
| Reference          | 85JCAE "Prehled Prumyslove Toxikologie; Organicke Latky," Marhold, J., Prague , Czechoslovakia, Avicenum, 1986 Volume(issue)/page/year: -,658,1986 | 85JCAE "Prehled Prumyslove Toxikologie; Organicke Latky," Marhold, J., Prague , Czechoslovakia, Avicenum, 1986 Volume(issue)/page/year: -,1052,1986 | 85JCAE "Prehled Prumyslove Toxikologie; Organicke Latky," Marhold, J., Prague , Czechoslovakia, Avicenum, 1986 Volume(issue)/page/year: -,1056,1986 |

## Model Applicability

Unknown features are fingerprint features in the query molecule, but not found in the training set.

- All properties and OPS components are within expected ranges.
- Unknown FCFP\_2 feature: 1315416442: [\*][C@H]1[\*][\*]O[C@H]1n(:[\*]):[\*]

## Feature Contribution

| Top features for positive contribution |             |                   |       |                                 |
|----------------------------------------|-------------|-------------------|-------|---------------------------------|
| Fingerprint                            | Bit/Smiles  | Feature Structure | Score | Moderate_Severe in training set |
| FCFP_12                                | -2091721556 |                   | 0.365 | 2 out of 3                      |

| FCFP_12                                | -1549103449 | 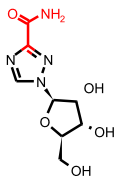<br><chem>[*]:[c](:[*])C(=O)N</chem>              | 0.206  | 2 out of 4                         |
|----------------------------------------|-------------|--------------------------------------------------------------------------------------------------------------------------------------|--------|------------------------------------|
| FCFP_12                                | -124685461  | <br><chem>[*]:n:[cH]:n:[*]</chem>                 | 0.206  | 2 out of 4                         |
| Top Features for negative contribution |             |                                                                                                                                      |        |                                    |
| Fingerprint                            | Bit/Smiles  | Feature Structure                                                                                                                    | Score  | Moderate_Severe<br>in training set |
| FCFP_12                                | 4427049     | <br><chem>[*]n1:[*]:[*]:[c]([*])<br/>):n:1</chem> | -0.893 | 0 out of 4                         |
| FCFP_12                                | -1272709286 | <br><chem>[*]C([*])CO</chem>                     | -0.475 | 18 out of 82                       |
| FCFP_12                                | 17          | <br><chem>[*]:n:[*]</chem>                      | -0.332 | 8 out of 32                        |

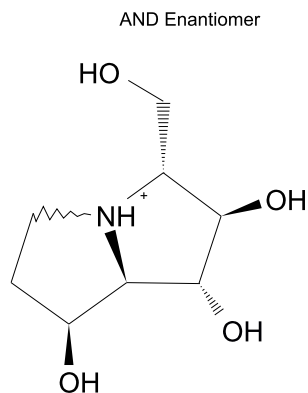

$C_8H_{16}NO_4$   
 Molecular Weight: 190.21693  
 ALogP: -3.556  
 Rotatable Bonds: 1  
 Acceptors: 4  
 Donors: 5

## Model Prediction

Prediction: Irritant

Probability: 0.973

Enrichment: 1.057

Bayesian Score: -0.731

Mahalanobis Distance: 10.663

Mahalanobis Distance p-value: 0.00854

Prediction: Positive if the Bayesian score is above the estimated best cutoff value from minimizing the false positive and false negative rate.

Probability: The estimated probability that the sample is in the positive category. This assumes that the Bayesian score follows a normal distribution and is different from the prediction using a cutoff.

Enrichment: An estimate of enrichment, that is, the increased likelihood (versus random) of this sample being in the category.

Bayesian Score: The standard Laplacian-modified Bayesian score.

Mahalanobis Distance: The Mahalanobis distance (MD) is the distance to the center of the training data. The larger the MD, the less trustworthy the prediction.

Mahalanobis Distance p-value: The p-value gives the fraction of training data with an MD greater than or equal to the one for the given sample, assuming normally distributed data. The smaller the p-value, the less trustworthy the prediction. For highly non-normal X properties (e.g., fingerprints), the MD p-value is wildly inaccurate.

## Structural Similar Compounds

| Name               | 2-Imidazolidinone, 1,3-bis(hydroxymethyl)-4,5-dihydroxy-                                                                                                                                                          | Triethylenetetramine                                                                                                                                 | 1,2-Ethanediamine, N-(2-aminoethyl)-N'-(2-((2-aminoethyl)amino)ethyl)-                                                                               |
|--------------------|-------------------------------------------------------------------------------------------------------------------------------------------------------------------------------------------------------------------|------------------------------------------------------------------------------------------------------------------------------------------------------|------------------------------------------------------------------------------------------------------------------------------------------------------|
| Structure          |                                                                                                                                                                                                                   |                                                                                                                                                      |                                                                                                                                                      |
| Actual Endpoint    | Irritant                                                                                                                                                                                                          | Irritant                                                                                                                                             | Irritant                                                                                                                                             |
| Predicted Endpoint | Irritant                                                                                                                                                                                                          | Irritant                                                                                                                                             | Irritant                                                                                                                                             |
| Distance           | 0.771                                                                                                                                                                                                             | 0.828                                                                                                                                                | 0.895                                                                                                                                                |
| Reference          | 28ZPAK "Sbornik Vysledku Toxologickeho Vysetreni Latek A Pripravku," Marhol d, J.V., Institut Pro Vychovu Vedoucich Pracovniku Chemickeho Prumyclu Praha, Cechoslovakia, 1972<br>Volume(issue)/page/year: -,269,1 | 85JCAE "Prehled Prumyslove Toxikologie; Organické Latky," Marhold, J., Prague, Czechoslovakia, Avicenum, 1986<br>Volume(issue)/page/year: -,443,1986 | 85JCAE "Prehled Prumyslove Toxikologie; Organické Latky," Marhold, J., Prague, Czechoslovakia, Avicenum, 1986<br>Volume(issue)/page/year: -,446,1986 |

## Model Applicability

Unknown features are fingerprint features in the query molecule, but not found in the training set.

1. All properties and OPS components are within expected ranges.
2. Unknown FCFP\_2 feature: -1853714334: [\*][C@@H]1[\*][\*][C@H]2[\*][\*]C[NH+]12
3. Unknown FCFP\_2 feature: -1817836174: [\*][C@H]1[\*][\*][NH+]2[\*][\*][C@H]([\*])C12
4. Unknown FCFP\_2 feature: 1155241219: [\*][NH+]1[\*][\*]CC1

## Feature Contribution

| Top Features for negative contribution |            |                   |       |                          |
|----------------------------------------|------------|-------------------|-------|--------------------------|
| Fingerprint                            | Bit/Smiles | Feature Structure | Score | Irritant in training set |
|                                        |            |                   |       |                          |

|         |             |                                                                                                                                   |        |                |
|---------|-------------|-----------------------------------------------------------------------------------------------------------------------------------|--------|----------------|
| FCFP_12 | 3           | 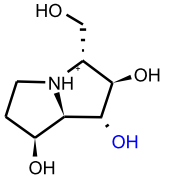 <p>[*]O</p>                                   | -0.081 | 291 out of 345 |
| FCFP_12 | -1272798659 |  <p>[*][C@@H]1[*][*]CC1</p>                    | 0.000  | 630 out of 658 |
| FCFP_12 | -1043250487 |  <p>[*][C@@H]1[*][*][C@H]<br/>([*])[C@H]1O</p> | 0.000  | 55 out of 61   |

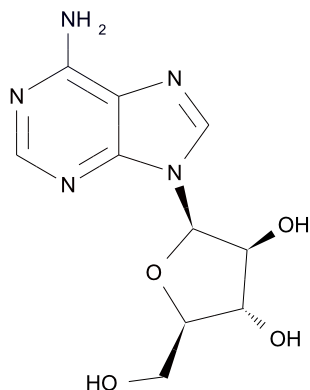
 $C_{10}H_{13}N_5O_4$ 

Molecular Weight: 267.24132

ALogP: -1.881

Rotatable Bonds: 2

Acceptors: 8

Donors: 4

## Model Prediction

**Prediction: Irritant**

Probability: 0.974

Enrichment: 1.058

Bayesian Score: -0.690

Mahalanobis Distance: 10.365

Mahalanobis Distance p-value: 0.0225

Prediction: Positive if the Bayesian score is above the estimated best cutoff value from minimizing the false positive and false negative rate.

Probability: The estimated probability that the sample is in the positive category. This assumes that the Bayesian score follows a normal distribution and is different from the prediction using a cutoff.

Enrichment: An estimate of enrichment, that is, the increased likelihood (versus random) of this sample being in the category.

Bayesian Score: The standard Laplacian-modified Bayesian score.

Mahalanobis Distance: The Mahalanobis distance (MD) is the distance to the center of the training data. The larger the MD, the less trustworthy the prediction.

Mahalanobis Distance p-value: The p-value gives the fraction of training data with an MD greater than or equal to the one for the given sample, assuming normally distributed data. The smaller the p-value, the less trustworthy the prediction. For highly non-normal X properties (e.g., fingerprints), the MD p-value is wildly inaccurate.

## Structural Similar Compounds

| Name               | Citric acid                                                                                                                                       | Benzene-1,3-dicarboxylic acid, 5-sulfo-                                                                                                            | 2,2'-Benzidine disulfonic acid |
|--------------------|---------------------------------------------------------------------------------------------------------------------------------------------------|----------------------------------------------------------------------------------------------------------------------------------------------------|--------------------------------|
| Structure          |                                                                                                                                                   |                                                                                                                                                    |                                |
| Actual Endpoint    | Irritant                                                                                                                                          | Irritant                                                                                                                                           | Non-Irritant                   |
| Predicted Endpoint | Irritant                                                                                                                                          | Non-Irritant                                                                                                                                       | Non-Irritant                   |
| Distance           | 0.771                                                                                                                                             | 0.804                                                                                                                                              | 0.808                          |
| Reference          | 85JCAE "Prehled Prumyslove Toxikologie; Organické Latky," Marhold, J., Prague, Czechoslovakia, Avicenum, 1986 Volume(issue)/page/year: -,658,1986 | 85JCAE "Prehled Prumyslove Toxikologie; Organické Latky," Marhold, J., Prague, Czechoslovakia, Avicenum, 1986 Volume(issue)/page/year: -,1056,1986 | 28ZPAK -,191,72                |

## Model Applicability

Unknown features are fingerprint features in the query molecule, but not found in the training set.

1. All properties and OPS components are within expected ranges.

## Feature Contribution

### Top features for positive contribution

| Fingerprint | Bit/Smiles | Feature Structure    | Score | Irritant in training set |
|-------------|------------|----------------------|-------|--------------------------|
| FCFP_12     | -124685461 | <br>[*]:n:[cH]:n:[*] | 0.073 | 5 out of 5               |

| FCFP_12                                | -475316933  | 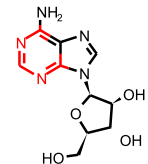<br><chem>[*][c]1:[*]:[c](:[*])<br/>:n:[cH]:n:1</chem> | 0.070  | 4 out of 4               |
|----------------------------------------|-------------|-------------------------------------------------------------------------------------------------------------------------------------------|--------|--------------------------|
| FCFP_12                                | -2091721556 | <br><chem>[*][C@H]1[*][*]O[C@@H<br/>]1CO</chem>        | 0.070  | 4 out of 4               |
| Top Features for negative contribution |             |                                                                                                                                           |        |                          |
| Fingerprint                            | Bit/Smiles  | Feature Structure                                                                                                                         | Score  | Irritant in training set |
| FCFP_12                                | 1069584379  | <br><chem>[*]:[c](:[*])N</chem>                        | -0.439 | 38 out of 65             |
| FCFP_12                                | 16          | <br><chem>[*]:[cH]:[*]</chem>                         | -0.084 | 423 out of 503           |
| FCFP_12                                | 3           | <br><chem>[*]O</chem>                                | -0.081 | 291 out of 345           |

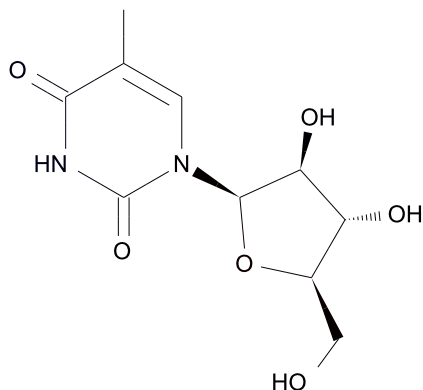
 $C_{10}H_{14}N_2O_6$ 

Molecular Weight: 258.22795

ALogP: -2.005

Rotatable Bonds: 2

Acceptors: 6

Donors: 4

## Model Prediction

**Prediction:** Irritant

Probability: 0.975

Enrichment: 1.058

Bayesian Score: -0.618

Mahalanobis Distance: 14.458

Mahalanobis Distance p-value: 2.7e-012

Prediction: Positive if the Bayesian score is above the estimated best cutoff value from minimizing the false positive and false negative rate.

Probability: The estimated probability that the sample is in the positive category. This assumes that the Bayesian score follows a normal distribution and is different from the prediction using a cutoff.

Enrichment: An estimate of enrichment, that is, the increased likelihood (versus random) of this sample being in the category.

Bayesian Score: The standard Laplacian-modified Bayesian score.

Mahalanobis Distance: The Mahalanobis distance (MD) is the distance to the center of the training data. The larger the MD, the less trustworthy the prediction.

Mahalanobis Distance p-value: The p-value gives the fraction of training data with an MD greater than or equal to the one for the given sample, assuming normally distributed data. The smaller the p-value, the less trustworthy the prediction. For highly non-normal X properties (e.g., fingerprints), the MD p-value is wildly inaccurate.

## Structural Similar Compounds

| Name               | 2-Imidazolidinone, 1,3-bis(hydroxymethyl)-4,5-dihydroxy-                                                                                                                                                              | Anthraquinone, 1,5-diamino-4,8-dihydroxy- | Propionamidine, 2,2'-azobis(2-methyl-, dihydrochloride                                                                                                                                                                |
|--------------------|-----------------------------------------------------------------------------------------------------------------------------------------------------------------------------------------------------------------------|-------------------------------------------|-----------------------------------------------------------------------------------------------------------------------------------------------------------------------------------------------------------------------|
| Structure          |                                                                                                                                                                                                                       |                                           |                                                                                                                                                                                                                       |
| Actual Endpoint    | Irritant                                                                                                                                                                                                              | Non-Irritant                              | Irritant                                                                                                                                                                                                              |
| Predicted Endpoint | Irritant                                                                                                                                                                                                              | Non-Irritant                              | Irritant                                                                                                                                                                                                              |
| Distance           | 0.680                                                                                                                                                                                                                 | 0.755                                     | 0.792                                                                                                                                                                                                                 |
| Reference          | 28ZPAK "Sbornik Vysledku Toxikologickeho Vysetreni Latek A Pripravku," Marhol d, J.V., Institut Pro Vychovu Vedoucich Pracovniku Chemickeho Prumyclu Praha, Cz echoslovakia, 1972<br>Volume(issue)/page/year: -,269,1 | 28ZPAK -,103,72                           | EPASR* United States Environmental Protection Agency, Office of Pesticides and Toxic Substances. (U.S. Environmental Protection Agency, 401 M St., SW, Washington, DC 20460)<br>History unknown.<br>Volume(issue)/pag |

## Model Applicability

Unknown features are fingerprint features in the query molecule, but not found in the training set.

1. All properties and OPS components are within expected ranges.

## Feature Contribution

### Top features for positive contribution

| Fingerprint | Bit/Smiles | Feature Structure | Score | Irritant in training set |
|-------------|------------|-------------------|-------|--------------------------|
|-------------|------------|-------------------|-------|--------------------------|



|                                        |            |                                                                                                                                    |        |                          |
|----------------------------------------|------------|------------------------------------------------------------------------------------------------------------------------------------|--------|--------------------------|
| FCFP_12                                | 699500266  | 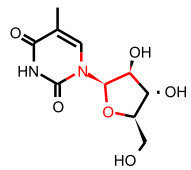<br><chem>[*][C@H]1[*][*]O[C@H]1N([*])[*]</chem> | 0.085  | 25 out of 25             |
| FCFP_12                                | 451877515  | <br><chem>[*]N([*])C=C([*])[*]</chem>           | 0.082  | 13 out of 13             |
| FCFP_12                                | 436886043  | <br><chem>[*]C=C([C])C(=[*])[*]</chem>          | 0.080  | 129 out of 130           |
| Top Features for negative contribution |            |                                                                                                                                    |        |                          |
| Fingerprint                            | Bit/Smiles | Feature Structure                                                                                                                  | Score  | Irritant in training set |
| FCFP_12                                | 566058135  | <br><chem>[*]NC(=O)C(=[*])[*]</chem>           | -0.367 | 13 out of 21             |
| FCFP_12                                | 3          | <br><chem>[*]O</chem>                         | -0.081 | 291 out of 345           |

|         |             |                                                                                                                        |        |            |
|---------|-------------|------------------------------------------------------------------------------------------------------------------------|--------|------------|
| FCFP_12 | -1986098826 | 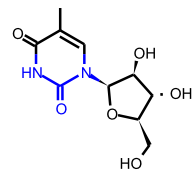<br><chem>[*]NC(=O)N([*])[*]</chem> | -0.079 | 5 out of 6 |
|---------|-------------|------------------------------------------------------------------------------------------------------------------------|--------|------------|

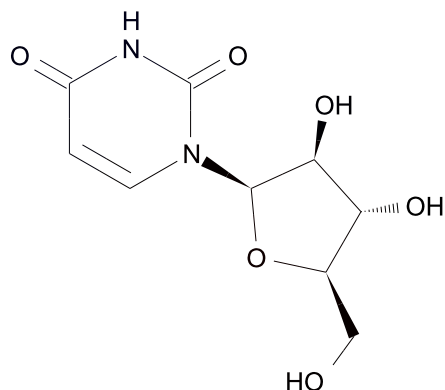

$C_9H_{12}N_2O_6$

Molecular Weight: 244.20137

ALogP: -2.451

Rotatable Bonds: 2

Acceptors: 6

Donors: 4

## Model Prediction

Prediction: Irritant

Probability: 0.974

Enrichment: 1.058

Bayesian Score: -0.671

Mahalanobis Distance: 13.834

Mahalanobis Distance p-value: 2.98e-010

Prediction: Positive if the Bayesian score is above the estimated best cutoff value from minimizing the false positive and false negative rate.

Probability: The estimated probability that the sample is in the positive category. This assumes that the Bayesian score follows a normal distribution and is different from the prediction using a cutoff.

Enrichment: An estimate of enrichment, that is, the increased likelihood (versus random) of this sample being in the category.

Bayesian Score: The standard Laplacian-modified Bayesian score.

Mahalanobis Distance: The Mahalanobis distance (MD) is the distance to the center of the training data. The larger the MD, the less trustworthy the prediction.

Mahalanobis Distance p-value: The p-value gives the fraction of training data with an MD greater than or equal to the one for the given sample, assuming normally distributed data. The smaller the p-value, the less trustworthy the prediction. For highly non-normal X properties (e.g., fingerprints), the MD p-value is wildly inaccurate.

## Structural Similar Compounds

| Name               | 2-Imidazolidinone, 1,3-bis(hydroxymethyl)-4,5-dihydroxy-                                                                                                                                                            | Citric acid                                                                                                                                          | Anthraquinone, 1,5-diamino-4,8-dihydroxy- |
|--------------------|---------------------------------------------------------------------------------------------------------------------------------------------------------------------------------------------------------------------|------------------------------------------------------------------------------------------------------------------------------------------------------|-------------------------------------------|
| Structure          |                                                                                                                                                                                                                     |                                                                                                                                                      |                                           |
| Actual Endpoint    | Irritant                                                                                                                                                                                                            | Irritant                                                                                                                                             | Non-Irritant                              |
| Predicted Endpoint | Irritant                                                                                                                                                                                                            | Irritant                                                                                                                                             | Non-Irritant                              |
| Distance           | 0.636                                                                                                                                                                                                               | 0.765                                                                                                                                                | 0.795                                     |
| Reference          | 28ZPAK "Sbornik Vysledku Toxikologickeho Vysetreni Latek A Pripravku," Marhol d, J.V., Institut Pro Vychovu Vedoucich Pracovniku Chemickeho Prumyclu Praha, Cechoslovakia, 1972<br>Volume(issue)/page/year: -,269,1 | 85JCAE "Prehled Prumyslove Toxikologie; Organické Latky," Marhold, J., Prague, Czechoslovakia, Avicenum, 1986<br>Volume(issue)/page/year: -,658,1986 | 28ZPAK -,103,72                           |

## Model Applicability

Unknown features are fingerprint features in the query molecule, but not found in the training set.

1. All properties and OPS components are within expected ranges.

## Feature Contribution

### Top features for positive contribution

| Fingerprint | Bit/Smiles | Feature Structure | Score | Irritant in training set |
|-------------|------------|-------------------|-------|--------------------------|
|-------------|------------|-------------------|-------|--------------------------|

|                                        |            |                                                                                                                                     |        |                          |
|----------------------------------------|------------|-------------------------------------------------------------------------------------------------------------------------------------|--------|--------------------------|
| FCFP_12                                | 699500266  | 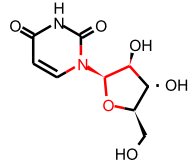<br><chem>[*][C@H]1[*][*]O[C@H]1N([*])[*]</chem> | 0.085  | 25 out of 25             |
| FCFP_12                                | 451877515  | <br><chem>[*]N([*])C=C([*])[*]</chem>            | 0.082  | 13 out of 13             |
| FCFP_12                                | 451847724  | <br><chem>[*]\C=C/C(=[*])[*]</chem>              | 0.074  | 270 out of 274           |
| Top Features for negative contribution |            |                                                                                                                                     |        |                          |
| Fingerprint                            | Bit/Smiles | Feature Structure                                                                                                                   | Score  | Irritant in training set |
| FCFP_12                                | 566058135  | <br><chem>[*]NC(=O)C(=[*])[*]</chem>            | -0.367 | 13 out of 21             |
| FCFP_12                                | 3          | <br><chem>[*]O</chem>                          | -0.081 | 291 out of 345           |

|         |             |                                                                                                                        |        |            |
|---------|-------------|------------------------------------------------------------------------------------------------------------------------|--------|------------|
| FCFP_12 | -1986098826 | 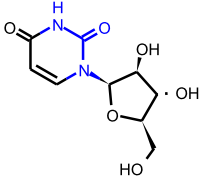<br><chem>[*]NC(=O)N([*])[*]</chem> | -0.079 | 5 out of 6 |
|---------|-------------|------------------------------------------------------------------------------------------------------------------------|--------|------------|

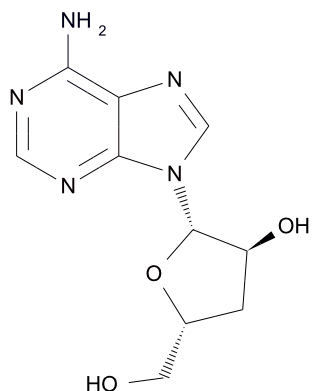
 $C_{10}H_{13}N_5O_3$ 

Molecular Weight: 251.24191

ALogP: -1.308

Rotatable Bonds: 2

Acceptors: 7

Donors: 3

## Model Prediction

**Prediction: Irritant**

Probability: 0.974

Enrichment: 1.058

Bayesian Score: -0.690

Mahalanobis Distance: 9.741

Mahalanobis Distance p-value: 0.117

Prediction: Positive if the Bayesian score is above the estimated best cutoff value from minimizing the false positive and false negative rate.

Probability: The estimated probability that the sample is in the positive category. This assumes that the Bayesian score follows a normal distribution and is different from the prediction using a cutoff.

Enrichment: An estimate of enrichment, that is, the increased likelihood (versus random) of this sample being in the category. Bayesian Score: The standard Laplacian-modified Bayesian score.

Mahalanobis Distance: The Mahalanobis distance (MD) is the distance to the center of the training data. The larger the MD, the less trustworthy the prediction.

Mahalanobis Distance p-value: The p-value gives the fraction of training data with an MD greater than or equal to the one for the given sample, assuming normally distributed data. The smaller the p-value, the less trustworthy the prediction. For highly non-normal X properties (e.g., fingerprints), the MD p-value is wildly inaccurate.

## Structural Similar Compounds

| Name               | C.I. Fluorescent Brightening Agent 24                                                                     | Benzene-1,3-dicarboxylic acid, 5-sulfo-                                                                                                            | Glutamic acid, N-(p-(methylamino)benzoyl)-, sodium salt                                                                                                       |
|--------------------|-----------------------------------------------------------------------------------------------------------|----------------------------------------------------------------------------------------------------------------------------------------------------|---------------------------------------------------------------------------------------------------------------------------------------------------------------|
| Structure          |                                                                                                           |                                                                                                                                                    |                                                                                                                                                               |
| Actual Endpoint    | Irritant                                                                                                  | Irritant                                                                                                                                           | Irritant                                                                                                                                                      |
| Predicted Endpoint | Non-Irritant                                                                                              | Non-Irritant                                                                                                                                       | Non-Irritant                                                                                                                                                  |
| Distance           | 0.740                                                                                                     | 0.741                                                                                                                                              | 0.744                                                                                                                                                         |
| Reference          | MVCRB3 MVC-Report. (Stockholm, Sweden) No.1-2, 1972-73. Discontinued. Volume(issue)/page/year: 2,193,1973 | 85JCAE "Prehled Prumyslove Toxikologie; Organické Latky," Marhold, J., Prague, Czechoslovakia, Avicenum, 1986 Volume(issue)/page/year: -,1056,1986 | FCTOD7 Food and Chemical Toxicology. (Pergamon Press Inc., Maxwell House, Fairview Park, Elmsford, NY 10523) V.20- 1982- Volume(issue)/page/year: 20,563,1982 |

## Model Applicability

Unknown features are fingerprint features in the query molecule, but not found in the training set.

1. All properties and OPS components are within expected ranges.

## Feature Contribution

### Top features for positive contribution

| Fingerprint | Bit/Smiles | Feature Structure                 | Score | Irritant in training set |
|-------------|------------|-----------------------------------|-------|--------------------------|
| FCFP_12     | -124685461 | <br><chem>[*]:n:[cH]:n:[*]</chem> | 0.073 | 5 out of 5               |

| FCFP_12                                | -2091721556 | 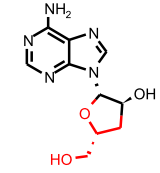<br><chem>[*][C@H]1[*][*]O[C@@H]1CO</chem>         | 0.070  | 4 out of 4               |
|----------------------------------------|-------------|---------------------------------------------------------------------------------------------------------------------------------------|--------|--------------------------|
| FCFP_12                                | -475316933  | <br><chem>[*][c]1:[*]:[c](:[*]) :n:[cH]:n:1</chem> | 0.070  | 4 out of 4               |
| Top Features for negative contribution |             |                                                                                                                                       |        |                          |
| Fingerprint                            | Bit/Smiles  | Feature Structure                                                                                                                     | Score  | Irritant in training set |
| FCFP_12                                | 1069584379  | <br><chem>[*]:[c](:[*])N</chem>                    | -0.439 | 38 out of 65             |
| FCFP_12                                | 16          | <br><chem>[*]:[cH]:[*]</chem>                     | -0.084 | 423 out of 503           |
| FCFP_12                                | 3           | <br><chem>[*]O</chem>                            | -0.081 | 291 out of 345           |

# Ribavirin

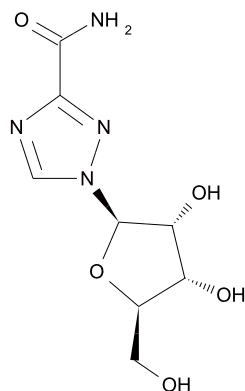

$C_8H_{12}N_4O_5$

Molecular Weight: 244.20467

ALogP: -2.745

Rotatable Bonds: 3

Acceptors: 7

Donors: 4

## Model Prediction

**Prediction: Irritant**

Probability: 0.977

Enrichment: 1.061

Bayesian Score: -0.345

Mahalanobis Distance: 10.393

Mahalanobis Distance p-value: 0.0206

Prediction: Positive if the Bayesian score is above the estimated best cutoff value from minimizing the false positive and false negative rate.

Probability: The estimated probability that the sample is in the positive category. This assumes that the Bayesian score follows a normal distribution and is different from the prediction using a cutoff.

Enrichment: An estimate of enrichment, that is, the increased likelihood (versus random) of this sample being in the category.

Bayesian Score: The standard Laplacian-modified Bayesian score.

Mahalanobis Distance: The Mahalanobis distance (MD) is the distance to the center of the training data. The larger the MD, the less trustworthy the prediction.

Mahalanobis Distance p-value: The p-value gives the fraction of training data with an MD greater than or equal to the one for the given sample, assuming normally distributed data. The smaller the p-value, the less trustworthy the prediction. For highly non-normal X properties (e.g., fingerprints), the MD p-value is wildly inaccurate.

# TOPKAT\_Skin\_Irritancy\_None\_vs\_Irritant

## Structural Similar Compounds

| Name               | Citric acid                                                                                                                                        | 2-Imidazolidinone, 1,3-bis(hydroxymethyl)-4,5-dihydroxy-                                                                                                                                                           | p-Benzenedisulfonic acid, 2-amino-                                                                                                                  |
|--------------------|----------------------------------------------------------------------------------------------------------------------------------------------------|--------------------------------------------------------------------------------------------------------------------------------------------------------------------------------------------------------------------|-----------------------------------------------------------------------------------------------------------------------------------------------------|
| Structure          |                                                                                                                                                    |                                                                                                                                                                                                                    |                                                                                                                                                     |
| Actual Endpoint    | Irritant                                                                                                                                           | Irritant                                                                                                                                                                                                           | Irritant                                                                                                                                            |
| Predicted Endpoint | Irritant                                                                                                                                           | Irritant                                                                                                                                                                                                           | Non-Irritant                                                                                                                                        |
| Distance           | 0.679                                                                                                                                              | 0.782                                                                                                                                                                                                              | 0.789                                                                                                                                               |
| Reference          | 85JCAE "Prehled Prumyslove Toxikologie; Organicke Latky," Marhold, J., Prague , Czechoslovakia, Avicenum, 1986 Volume(issue)/page/year: -,658,1986 | 28ZPAK "Sbornik Vysledku Toxikologickeho Vysetreni Latek A Pripravku," Marhol d, J.V., Institut Pro Vychovu Vedoucicn Pracovniku Chemickeho Prumyclu Praha, Cz echoslovakia, 1972 Volume(issue)/page/year: -,269,1 | 85JCAE "Prehled Prumyslove Toxikologie; Organicke Latky," Marhold, J., Prague , Czechoslovakia, Avicenum, 1986 Volume(issue)/page/year: -,1052,1986 |

## Model Applicability

Unknown features are fingerprint features in the query molecule, but not found in the training set.

1. All properties and OPS components are within expected ranges.

## Feature Contribution

### Top features for positive contribution

| Fingerprint | Bit/Smiles | Feature Structure | Score | Irritant in training set |
|-------------|------------|-------------------|-------|--------------------------|
|-------------|------------|-------------------|-------|--------------------------|



|                                        |             |                                                                                                                                 |        |                          |
|----------------------------------------|-------------|---------------------------------------------------------------------------------------------------------------------------------|--------|--------------------------|
| FCFP_12                                | -1549103449 | 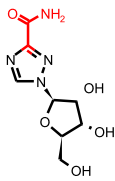<br><chem>[*]:[c](:[*])C(=O)N</chem>         | 0.073  | 5 out of 5               |
| FCFP_12                                | -124685461  | <br><chem>[*]:n:[cH]:n:[*]</chem>            | 0.073  | 5 out of 5               |
| FCFP_12                                | 4427049     | <br><chem>[*]n1:[*]:[*]:[c]([*]) :n:1</chem> | 0.073  | 5 out of 5               |
| Top Features for negative contribution |             |                                                                                                                                 |        |                          |
| Fingerprint                            | Bit/Smiles  | Feature Structure                                                                                                               | Score  | Irritant in training set |
| FCFP_12                                | 16          | <br><chem>[*]:[cH]:[*]</chem>               | -0.084 | 423 out of 503           |
| FCFP_12                                | 3           | <br><chem>[*]O</chem>                      | -0.081 | 291 out of 345           |

|         |            |                                                                                                               |       |                |
|---------|------------|---------------------------------------------------------------------------------------------------------------|-------|----------------|
| FCFP_12 | 1070061035 | 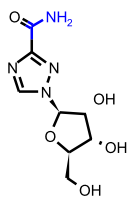<br><chem>[*]C([*])O</chem> | 0.000 | 215 out of 237 |
|---------|------------|---------------------------------------------------------------------------------------------------------------|-------|----------------|

AND Enantiomer

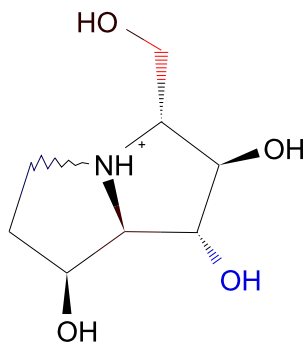 $C_8H_{16}NO_4$ 

Molecular Weight: 190.21693

ALogP: -3.556

Rotatable Bonds: 1

Acceptors: 4

Donors: 5

## Model Prediction

Prediction: 9.294

Unit: mg/kg\_body\_weight/day

Mahalanobis Distance: 8.835

Mahalanobis Distance p-value: 0.365

Mahalanobis Distance: The Mahalanobis distance (MD) is a generalization of the Euclidean distance that accounts for correlations among the X properties. It is calculated as the distance to the center of the training data. The larger the MD, the less trustworthy the prediction.

Mahalanobis Distance p-value: The p-value gives the fraction of training data with an MD greater than or equal to the one for the given sample, assuming normally distributed data. The smaller the p-value, the less trustworthy the prediction. For highly non-normal X properties (e.g., fingerprints), the MD p-value is wildly inaccurate.

## Structural Similar Compounds

| Name                        | 5-Azacytidine | 720     | 2-Hydroxyethylhydrazine s |
|-----------------------------|---------------|---------|---------------------------|
| Structure                   |               |         |                           |
| Actual Endpoint (-log C)    | 6.49901       | 6.49901 | 5.28258                   |
| Predicted Endpoint (-log C) | 4.14504       | 4.14504 | 3.70898                   |
| Distance                    | 0.846         | 0.846   | 0.874                     |
| Reference                   | CPDB          | CPDB    | CPDB                      |

## Model Applicability

Unknown features are fingerprint features in the query molecule, but not found in the training set.

1. All properties and OPS components are within expected ranges.
2. Unknown ECFP\_2 feature: 1976330679: [\*][NH+](\*)[\*]
3. Unknown ECFP\_2 feature: -1693770146: [\*][C@H]1[\*][\*][C@H]2[\*][\*][C[NH+]12
4. Unknown ECFP\_2 feature: -1395316370: [\*][C@H]1[\*][\*][NH+]2[\*][\*][C@H]([\*])C12
5. Unknown ECFP\_2 feature: -705668329: [\*][C[C@H]1[C@H]([\*])[\*][\*][NH+]1[\*]
6. Unknown ECFP\_2 feature: -244159614: [\*][NH+]1[\*][\*]CC1

## Feature Contribution

### Top features for positive contribution

| Fingerprint | Bit/Smiles | Feature Structure           | Score |
|-------------|------------|-----------------------------|-------|
| ECFP_6      | 1559650422 | <p><chem>[*]C[*]</chem></p> | 0.203 |

|                                        |             |                                                                                                         |        |
|----------------------------------------|-------------|---------------------------------------------------------------------------------------------------------|--------|
| ECFP_6                                 | -167460056  | 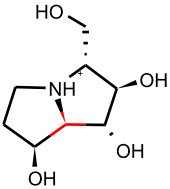 <p>[*]C([*])[*]</p> | 0.060  |
| ECFP_6                                 | 2022454958  |  <p>[*]CO</p>        | 0.045  |
| Top Features for negative contribution |             |                                                                                                         |        |
| Fingerprint                            | Bit/Smiles  | Feature Structure                                                                                       | Score  |
| ECFP_6                                 | -1884411803 |  <p>[*]O</p>         | -0.217 |
| ECFP_6                                 | -992506539  |  <p>[*]C[*]</p>     | -0.085 |

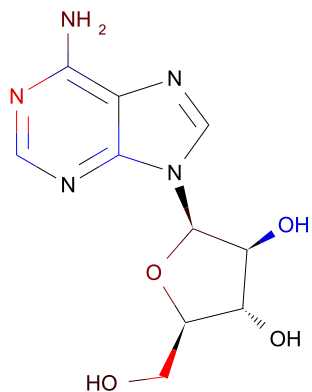

$C_{10}H_{13}N_5O_4$

Molecular Weight: 267.24132

ALogP: -1.881

Rotatable Bonds: 2

Acceptors: 8

Donors: 4

## Model Prediction

Prediction: 4.245

Unit: mg/kg\_body\_weight/day

Mahalanobis Distance: 8.944

Mahalanobis Distance p-value: 0.314

Mahalanobis Distance: The Mahalanobis distance (MD) is a generalization of the Euclidean distance that accounts for correlations among the X properties. It is calculated as the distance to the center of the training data. The larger the MD, the less trustworthy the prediction.

Mahalanobis Distance p-value: The p-value gives the fraction of training data with an MD greater than or equal to the one for the given sample, assuming normally distributed data. The smaller the p-value, the less trustworthy the prediction. For highly non-normal X properties (e.g., fingerprints), the MD p-value is wildly inaccurate.

## Structural Similar Compounds

| Name                        | (N-6)-(Methylnitroso)adenosine | 377     | 720     |
|-----------------------------|--------------------------------|---------|---------|
| Structure                   |                                |         |         |
| Actual Endpoint (-log C)    | 4.22928                        | 4.22928 | 6.49901 |
| Predicted Endpoint (-log C) | 5.36013                        | 5.36013 | 4.14504 |
| Distance                    | 0.413                          | 0.413   | 0.726   |
| Reference                   | CPDB                           | CPDB    | CPDB    |

## Model Applicability

Unknown features are fingerprint features in the query molecule, but not found in the training set.

1. OPS PC13 out of range. Value: -3.2678. Training min, max, SD, explained variance: -3.068, 3.6909, 1.329, 0.0220.

## Feature Contribution

### Top features for positive contribution

| Fingerprint | Bit/Smiles | Feature Structure | Score |
|-------------|------------|-------------------|-------|
| ECFP_6      | 655739385  | <br>[*]:n:[*]     | 0.229 |

| ECFP_6                                 | 1572579716  | 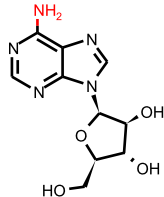<br>[*]N              | 0.225  |
|----------------------------------------|-------------|----------------------------------------------------------------------------------------------------------|--------|
| ECFP_6                                 | 1559650422  | <br>[*]C[*]           | 0.203  |
| Top Features for negative contribution |             |                                                                                                          |        |
| Fingerprint                            | Bit/Smiles  | Feature Structure                                                                                        | Score  |
| ECFP_6                                 | 642810091   | <br>[*]:[c](:[*]):[*] | -0.247 |
| ECFP_6                                 | -182236392  | <br>[*]:[cH]:[*]    | -0.232 |
| ECFP_6                                 | -1884411803 | <br>[*]O            | -0.217 |



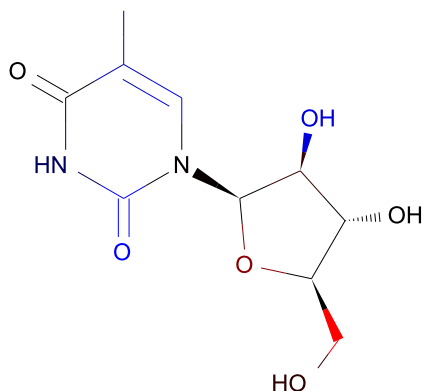

$C_{10}H_{14}N_2O_6$

Molecular Weight: 258.22795

ALogP: -2.005

Rotatable Bonds: 2

Acceptors: 6

Donors: 4

## Model Prediction

Prediction: 67.851

Unit: mg/kg\_body\_weight/day

Mahalanobis Distance: 11.000

Mahalanobis Distance p-value: 0.00144

Mahalanobis Distance: The Mahalanobis distance (MD) is a generalization of the Euclidean distance that accounts for correlations among the X properties. It is calculated as the distance to the center of the training data. The larger the MD, the less trustworthy the prediction.

Mahalanobis Distance p-value: The p-value gives the fraction of training data with an MD greater than or equal to the one for the given sample, assuming normally distributed data. The smaller the p-value, the less trustworthy the prediction. For highly non-normal X properties (e.g., fingerprints), the MD p-value is wildly inaccurate.

## Structural Similar Compounds

| Name                        | 720     | 5-Azacytidine | AZT     |
|-----------------------------|---------|---------------|---------|
| Structure                   |         |               |         |
| Actual Endpoint (-log C)    | 6.49901 | 6.49901       | 2.95561 |
| Predicted Endpoint (-log C) | 4.14504 | 4.14504       | 3.51843 |
| Distance                    | 0.470   | 0.470         | 0.607   |
| Reference                   | CPDB    | CPDB          | CPDB    |

## Model Applicability

Unknown features are fingerprint features in the query molecule, but not found in the training set.

1. All properties and OPS components are within expected ranges.

## Feature Contribution

### Top features for positive contribution

| Fingerprint | Bit/Smiles | Feature Structure | Score |
|-------------|------------|-------------------|-------|
| ECFP_6      | 1559650422 | <br>[*]C[*]       | 0.203 |



|                                        |            |                                                                                                                         |        |
|----------------------------------------|------------|-------------------------------------------------------------------------------------------------------------------------|--------|
| ECFP_6                                 | 683445015  | 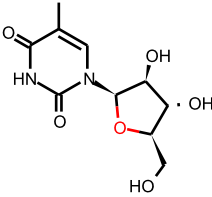<br><chem>[*]O[*]</chem>             | 0.136  |
| ECFP_6                                 | -167460056 | <br><chem>[*]C([*])[*]</chem>        | 0.060  |
| Top Features for negative contribution |            |                                                                                                                         |        |
| Fingerprint                            | Bit/Smiles | Feature Structure                                                                                                       | Score  |
| ECFP_6                                 | 2106656448 | <br><chem>[*]C(=O)[*]</chem>         | -0.275 |
| ECFP_6                                 | 642810091  | <br><chem>[*]:[c](:[*]):[*]</chem> | -0.247 |
| ECFP_6                                 | -182236392 | <br><chem>[*]:[cH]:[*]</chem>      | -0.232 |



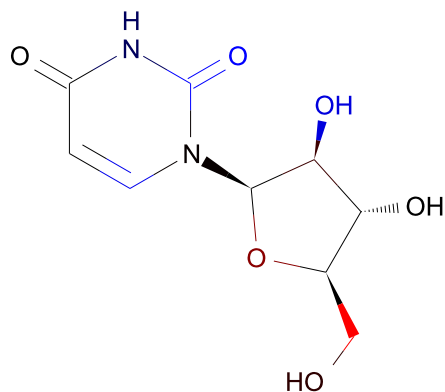

$C_9H_{12}N_2O_6$

Molecular Weight: 244.20137

ALogP: -2.451

Rotatable Bonds: 2

Acceptors: 6

Donors: 4

## Model Prediction

Prediction: 55.437

Unit: mg/kg\_body\_weight/day

Mahalanobis Distance: 10.082

Mahalanobis Distance p-value: 0.0287

Mahalanobis Distance: The Mahalanobis distance (MD) is a generalization of the Euclidean distance that accounts for correlations among the X properties. It is calculated as the distance to the center of the training data. The larger the MD, the less trustworthy the prediction.

Mahalanobis Distance p-value: The p-value gives the fraction of training data with an MD greater than or equal to the one for the given sample, assuming normally distributed data. The smaller the p-value, the less trustworthy the prediction. For highly non-normal X properties (e.g., fingerprints), the MD p-value is wildly inaccurate.

## Structural Similar Compounds

| Name                        | 5-Azacytidine | 720     | 534     |
|-----------------------------|---------------|---------|---------|
| Structure                   |               |         |         |
| Actual Endpoint (-log C)    | 6.49901       | 6.49901 | 5.98904 |
| Predicted Endpoint (-log C) | 4.14504       | 4.14504 | 5.04171 |
| Distance                    | 0.465         | 0.465   | 0.668   |
| Reference                   | CPDB          | CPDB    | CPDB    |

## Model Applicability

Unknown features are fingerprint features in the query molecule, but not found in the training set.

1. All properties and OPS components are within expected ranges.
2. Unknown ECFP\_2 feature: 935510419: [\*]C=C/N([\*])[\*]

## Feature Contribution

### Top features for positive contribution

| Fingerprint | Bit/Smiles | Feature Structure | Score |
|-------------|------------|-------------------|-------|
| ECFP_6      | 1559650422 | <br>[*]C[*]       | 0.203 |

| ECFP_6                                 | 683445015  | 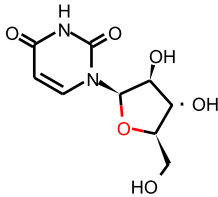<br>[*]O[*]             | 0.136  |
|----------------------------------------|------------|------------------------------------------------------------------------------------------------------------|--------|
| ECFP_6                                 | -167460056 | <br>[*]C([*])[*]        | 0.060  |
| Top Features for negative contribution |            |                                                                                                            |        |
| Fingerprint                            | Bit/Smiles | Feature Structure                                                                                          | Score  |
| ECFP_6                                 | 2106656448 | <br>[*]C(=O)[*]         | -0.275 |
| ECFP_6                                 | 642810091  | <br>[*]:[c](:[*]):[*] | -0.247 |
| ECFP_6                                 | -182236392 | <br>[*]:[cH]:[*]      | -0.232 |



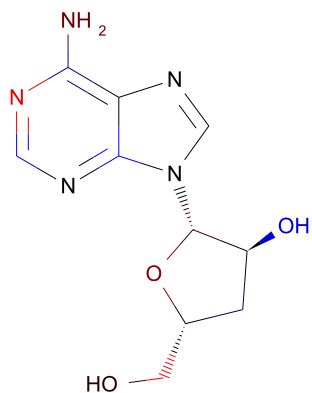
 $C_{10}H_{13}N_5O_3$ 

Molecular Weight: 251.24191

ALogP: -1.308

Rotatable Bonds: 2

Acceptors: 7

Donors: 3

## Model Prediction

Prediction: 6.402

Unit: mg/kg\_body\_weight/day

Mahalanobis Distance: 9.516

Mahalanobis Distance p-value: 0.113

Mahalanobis Distance: The Mahalanobis distance (MD) is a generalization of the Euclidean distance that accounts for correlations among the X properties. It is calculated as the distance to the center of the training data. The larger the MD, the less trustworthy the prediction.

Mahalanobis Distance p-value: The p-value gives the fraction of training data with an MD greater than or equal to the one for the given sample, assuming normally distributed data. The smaller the p-value, the less trustworthy the prediction. For highly non-normal X properties (e.g., fingerprints), the MD p-value is wildly inaccurate.

## Structural Similar Compounds

| Name                        | (N-6)-(Methylnitroso)adenosine | 377     | Triamterene |
|-----------------------------|--------------------------------|---------|-------------|
| Structure                   |                                |         |             |
| Actual Endpoint (-log C)    | 4.22928                        | 4.22928 | 3.62397     |
| Predicted Endpoint (-log C) | 5.36013                        | 5.36013 | 4.35116     |
| Distance                    | 0.546                          | 0.546   | 0.702       |
| Reference                   | CPDB                           | CPDB    | CPDB        |

## Model Applicability

Unknown features are fingerprint features in the query molecule, but not found in the training set.

1. All properties and OPS components are within expected ranges.

## Feature Contribution

### Top features for positive contribution

| Fingerprint | Bit/Smiles | Feature Structure | Score |
|-------------|------------|-------------------|-------|
| ECFP_6      | 655739385  | <br>[*]:n:[*]     | 0.229 |

|                                        |             |                                                                                                          |        |
|----------------------------------------|-------------|----------------------------------------------------------------------------------------------------------|--------|
| ECFP_6                                 | 1572579716  | 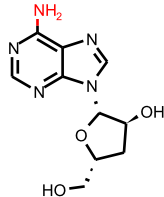<br>[*]N              | 0.225  |
| ECFP_6                                 | 1559650422  | <br>[*]C[*]           | 0.203  |
| Top Features for negative contribution |             |                                                                                                          |        |
| Fingerprint                            | Bit/Smiles  | Feature Structure                                                                                        | Score  |
| ECFP_6                                 | 642810091   | <br>[*]:[c](:[*]):[*] | -0.247 |
| ECFP_6                                 | -182236392  | <br>[*]:[cH]:[*]    | -0.232 |
| ECFP_6                                 | -1884411803 | <br>[*]O            | -0.217 |





# Ribavirin

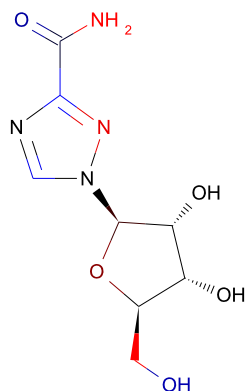

$C_8H_{12}N_4O_5$

Molecular Weight: 244.20467

ALogP: -2.745

Rotatable Bonds: 3

Acceptors: 7

Donors: 4

## Model Prediction

Prediction: 13.111

Unit: mg/kg\_body\_weight/day

Mahalanobis Distance: 9.209

Mahalanobis Distance p-value: 0.205

Mahalanobis Distance: The Mahalanobis distance (MD) is a generalization of the Euclidean distance that accounts for correlations among the X properties. It is calculated as the distance to the center of the training data. The larger the MD, the less trustworthy the prediction.

Mahalanobis Distance p-value: The p-value gives the fraction of training data with an MD greater than or equal to the one for the given sample, assuming normally distributed data. The smaller the p-value, the less trustworthy the prediction. For highly non-normal X properties (e.g., fingerprints), the MD p-value is wildly inaccurate.

# TOPKAT\_Carcinogenic\_Potency\_TD50\_Mouse

## Structural Similar Compounds

| Name                        | 5-Azacytidine | 720     | 534     |
|-----------------------------|---------------|---------|---------|
| Structure                   |               |         |         |
| Actual Endpoint (-log C)    | 6.49901       | 6.49901 | 5.98904 |
| Predicted Endpoint (-log C) | 4.14504       | 4.14504 | 5.04171 |
| Distance                    | 0.577         | 0.577   | 0.638   |
| Reference                   | CPDB          | CPDB    | CPDB    |

## Model Applicability

Unknown features are fingerprint features in the query molecule, but not found in the training set.

1. All properties and OPS components are within expected ranges.
2. Unknown ECFP\_2 feature: -1142718401: [\*]C([\*])n1:n:[\*]:[\*]:c:1
3. Unknown ECFP\_2 feature: 1128080580: [\*]C(=[\*])[c]1:n:[\*]:[\*]:n:1

## Feature Contribution

### Top features for positive contribution

| Fingerprint | Bit/Smiles | Feature Structure | Score |
|-------------|------------|-------------------|-------|
| ECFP_6      | 655739385  |                   | 0.229 |

| ECFP_6                                 | 1572579716  | 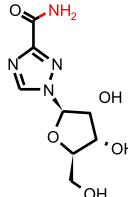<br>[*]N              | 0.225  |
|----------------------------------------|-------------|----------------------------------------------------------------------------------------------------------|--------|
| ECFP_6                                 | 1559650422  | <br>[*]C[*]           | 0.203  |
| Top Features for negative contribution |             |                                                                                                          |        |
| Fingerprint                            | Bit/Smiles  | Feature Structure                                                                                        | Score  |
| ECFP_6                                 | 642810091   | <br>[*]:[c](:[*]):[*] | -0.247 |
| ECFP_6                                 | -182236392  | <br>[*]:[cH]:[*]    | -0.232 |
| ECFP_6                                 | -1884411803 | <br>[*]O            | -0.217 |



AND Enantiomer

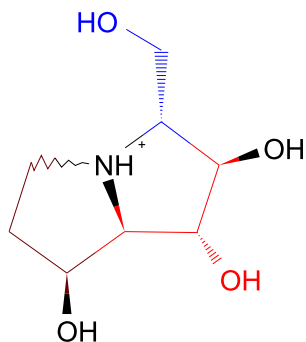 $C_8H_{16}NO_4$ 

Molecular Weight: 190.21693

ALogP: -3.556

Rotatable Bonds: 1

Acceptors: 4

Donors: 5

## Model Prediction

Prediction: 2.818

Unit: mg/kg\_body\_weight/day

Mahalanobis Distance: 9.390

Mahalanobis Distance p-value: 0.479

Mahalanobis Distance: The Mahalanobis distance (MD) is a generalization of the Euclidean distance that accounts for correlations among the X properties. It is calculated as the distance to the center of the training data. The larger the MD, the less trustworthy the prediction.

Mahalanobis Distance p-value: The p-value gives the fraction of training data with an MD greater than or equal to the one for the given sample, assuming normally distributed data. The smaller the p-value, the less trustworthy the prediction. For highly non-normal X properties (e.g., fingerprints), the MD p-value is wildly inaccurate.

## Structural Similar Compounds

| Name                        | Dibromodulcitol | 5-Azacytidine | 720     |
|-----------------------------|-----------------|---------------|---------|
| Structure                   |                 |               |         |
| Actual Endpoint (-log C)    | 4.56578         | 6.15731       | 6.15731 |
| Predicted Endpoint (-log C) | 5.42021         | 5.04824       | 5.04824 |
| Distance                    | 0.823           | 0.831         | 0.831   |
| Reference                   | CPDB            | CPDB          | CPDB    |

## Model Applicability

Unknown features are fingerprint features in the query molecule, but not found in the training set.

1. All properties and OPS components are within expected ranges.

## Feature Contribution

### Top features for positive contribution

| Fingerprint | Bit/Smiles  | Feature Structure                              | Score |
|-------------|-------------|------------------------------------------------|-------|
| FCFP_6      | -1043250487 | <br><chem>*[C@@H]1[C@H]([C@H]1O)[C@H]2O</chem> | 1.153 |

| FCFP_6                                 | -1272798659 | 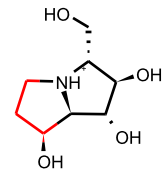<br><chem>[*][C@@H]1[*][*]CC1</chem> | 0.110  |
|----------------------------------------|-------------|-------------------------------------------------------------------------------------------------------------------------|--------|
| FCFP_6                                 | 3           | <br><chem>[*]O</chem>                | 0.064  |
| Top Features for negative contribution |             |                                                                                                                         |        |
| Fingerprint                            | Bit/Smiles  | Feature Structure                                                                                                       | Score  |
| FCFP_6                                 | -1272709286 | <br><chem>[*]C([*])CO</chem>         | -0.526 |
| FCFP_6                                 | 0           | <br><chem>[*]C([*])[*]</chem>      | -0.115 |

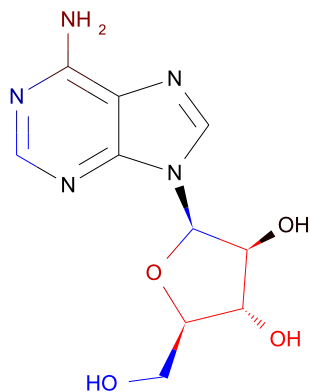
 $C_{10}H_{13}N_5O_4$ 

Molecular Weight: 267.24132

ALogP: -1.881

Rotatable Bonds: 2

Acceptors: 8

Donors: 4

## Model Prediction

Prediction: 3.280

Unit: mg/kg\_body\_weight/day

Mahalanobis Distance: 11.535

Mahalanobis Distance p-value: 0.0032

Mahalanobis Distance: The Mahalanobis distance (MD) is a generalization of the Euclidean distance that accounts for correlations among the X properties. It is calculated as the distance to the center of the training data. The larger the MD, the less trustworthy the prediction.

Mahalanobis Distance p-value: The p-value gives the fraction of training data with an MD greater than or equal to the one for the given sample, assuming normally distributed data. The smaller the p-value, the less trustworthy the prediction. For highly non-normal X properties (e.g., fingerprints), the MD p-value is wildly inaccurate.

## Structural Similar Compounds

| Name                        | b-Thioguanine deoxyriboside | 604     | C.I. disperse blue 1 |
|-----------------------------|-----------------------------|---------|----------------------|
| Structure                   |                             |         |                      |
| Actual Endpoint (-log C)    | 5.13004                     | 5.13004 | 3.23545              |
| Predicted Endpoint (-log C) | 4.82552                     | 4.96687 | 4.14295              |
| Distance                    | 0.540                       | 0.555   | 0.690                |
| Reference                   | CPDB                        | CPDB    | CPDB                 |

## Model Applicability

Unknown features are fingerprint features in the query molecule, but not found in the training set.

1. All properties and OPS components are within expected ranges.

## Feature Contribution

### Top features for positive contribution

| Fingerprint | Bit/Smiles  | Feature Structure                                                               | Score |
|-------------|-------------|---------------------------------------------------------------------------------|-------|
| FCFP_6      | -1043250487 | <br><chem>*[C@@H]1[C@H](N2C=NC3=C(N)N=CN=C3N2)O[C@H](CO)[C@@H](O)[C@H]1O</chem> | 1.153 |

|                                        |             |                                                                                                                                       |        |
|----------------------------------------|-------------|---------------------------------------------------------------------------------------------------------------------------------------|--------|
| FCFP_6                                 | 1           | 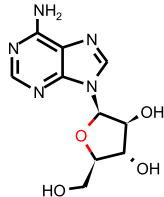<br><chem>[*]O[*]</chem>                           | 0.234  |
| FCFP_6                                 | -1043310069 | <br><chem>[*]C[C@H]1O[*]1[C@@H]1[*]C@@H1[*]</chem> | 0.085  |
| Top Features for negative contribution |             |                                                                                                                                       |        |
| Fingerprint                            | Bit/Smiles  | Feature Structure                                                                                                                     | Score  |
| FCFP_6                                 | -1272709286 | <br><chem>[*]C([*])CO</chem>                       | -0.526 |
| FCFP_6                                 | 16          | <br><chem>[*]:[cH]:[*]</chem>                    | -0.354 |
| FCFP_6                                 | 17          | <br><chem>[*]:n:[*]</chem>                       | -0.149 |





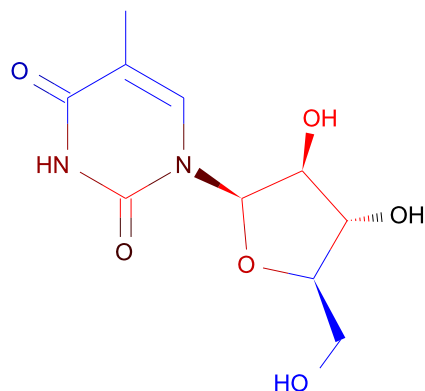

$C_{10}H_{14}N_2O_6$

Molecular Weight: 258.22795

ALogP: -2.005

Rotatable Bonds: 2

Acceptors: 6

Donors: 4

## Model Prediction

Prediction: 4.844

Unit: mg/kg\_body\_weight/day

Mahalanobis Distance: 10.874

Mahalanobis Distance p-value: 0.0266

Mahalanobis Distance: The Mahalanobis distance (MD) is a generalization of the Euclidean distance that accounts for correlations among the X properties. It is calculated as the distance to the center of the training data. The larger the MD, the less trustworthy the prediction.

Mahalanobis Distance p-value: The p-value gives the fraction of training data with an MD greater than or equal to the one for the given sample, assuming normally distributed data. The smaller the p-value, the less trustworthy the prediction. For highly non-normal X properties (e.g., fingerprints), the MD p-value is wildly inaccurate.

## Structural Similar Compounds

| Name                        | 720     | 5-Azacytidine | AZT     |
|-----------------------------|---------|---------------|---------|
| Structure                   |         |               |         |
| Actual Endpoint (-log C)    | 6.15731 | 6.15731       | 1.36245 |
| Predicted Endpoint (-log C) | 5.04824 | 5.04824       | 4.51955 |
| Distance                    | 0.442   | 0.442         | 0.559   |
| Reference                   | CPDB    | CPDB          | CPDB    |

## Model Applicability

Unknown features are fingerprint features in the query molecule, but not found in the training set.

1. All properties and OPS components are within expected ranges.

## Feature Contribution

### Top features for positive contribution

| Fingerprint | Bit/Smiles  | Feature Structure                                  | Score |
|-------------|-------------|----------------------------------------------------|-------|
| FCFP_6      | -1043250487 | <br><chem>[*][C@@H]1[*][*][C@H]([*])[C@H]1O</chem> | 1.153 |

|        |            |                                                                                                                           |       |
|--------|------------|---------------------------------------------------------------------------------------------------------------------------|-------|
| FCFP_6 | 1          | 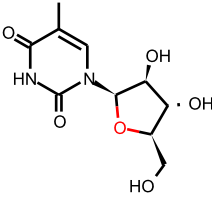<br><chem>[*]O[*]</chem>               | 0.234 |
| FCFP_6 | -885550502 | <br><chem>[*]C(=[*])NC(=[*])[*]</chem> | 0.229 |

### Top Features for negative contribution

| Fingerprint | Bit/Smiles  | Feature Structure                                                                                                         | Score  |
|-------------|-------------|---------------------------------------------------------------------------------------------------------------------------|--------|
| FCFP_6      | -1272709286 | 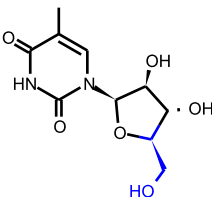<br><chem>[*]C([*])CO</chem>           | -0.526 |
| FCFP_6      | 436886043   | <br><chem>[*]C=C(C)C(=[*])[*]</chem> | -0.383 |
| FCFP_6      | 566058135   | <br><chem>[*]NC(=O)C(=[*])[*]</chem> | -0.182 |



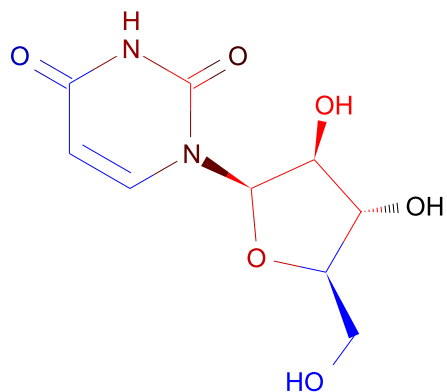

$C_9H_{12}N_2O_6$

Molecular Weight: 244.20137

ALogP: -2.451

Rotatable Bonds: 2

Acceptors: 6

Donors: 4

## Model Prediction

Prediction: 6.735

Unit: mg/kg\_body\_weight/day

Mahalanobis Distance: 10.784

Mahalanobis Distance p-value: 0.0343

Mahalanobis Distance: The Mahalanobis distance (MD) is a generalization of the Euclidean distance that accounts for correlations among the X properties. It is calculated as the distance to the center of the training data. The larger the MD, the less trustworthy the prediction.

Mahalanobis Distance p-value: The p-value gives the fraction of training data with an MD greater than or equal to the one for the given sample, assuming normally distributed data. The smaller the p-value, the less trustworthy the prediction. For highly non-normal X properties (e.g., fingerprints), the MD p-value is wildly inaccurate.

## Structural Similar Compounds

| Name                        | 5-Azacytidine | 720     | 534     |
|-----------------------------|---------------|---------|---------|
| Structure                   |               |         |         |
| Actual Endpoint (-log C)    | 6.15731       | 6.15731 | 5.43998 |
| Predicted Endpoint (-log C) | 5.04824       | 5.04824 | 6.92268 |
| Distance                    | 0.438         | 0.438   | 0.622   |
| Reference                   | CPDB          | CPDB    | CPDB    |

## Model Applicability

Unknown features are fingerprint features in the query molecule, but not found in the training set.

1. All properties and OPS components are within expected ranges.

## Feature Contribution

### Top features for positive contribution

| Fingerprint | Bit/Smiles  | Feature Structure                          | Score |
|-------------|-------------|--------------------------------------------|-------|
| FCFP_6      | -1043250487 | <br><br>[*][C@@H]1[*][*][C@H]1([*])[C@H]1O | 1.153 |

|                                        |             |                                                                                                                           |        |
|----------------------------------------|-------------|---------------------------------------------------------------------------------------------------------------------------|--------|
| FCFP_6                                 | 1           | 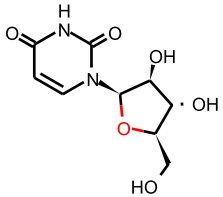<br><chem>[*]O[*]</chem>               | 0.234  |
| FCFP_6                                 | -885550502  | <br><chem>[*]C(=[*])NC(=[*])[*]</chem> | 0.229  |
| Top Features for negative contribution |             |                                                                                                                           |        |
| Fingerprint                            | Bit/Smiles  | Feature Structure                                                                                                         | Score  |
| FCFP_6                                 | -1272709286 | <br><chem>[*]C([*])CO</chem>           | -0.526 |
| FCFP_6                                 | 451847724   | <br><chem>[*]C=C/C(=[*])[*]</chem>   | -0.436 |
| FCFP_6                                 | 566058135   | <br><chem>[*]NC(=O)C(=[*])[*]</chem> | -0.182 |



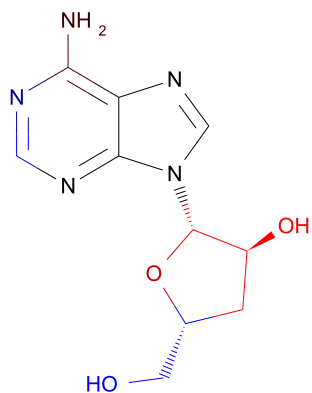
 $C_{10}H_{13}N_5O_3$ 

Molecular Weight: 251.24191

ALogP: -1.308

Rotatable Bonds: 2

Acceptors: 7

Donors: 3

## Model Prediction

Prediction: 2.651

Unit: mg/kg\_body\_weight/day

Mahalanobis Distance: 11.898

Mahalanobis Distance p-value: 0.000812

Mahalanobis Distance: The Mahalanobis distance (MD) is a generalization of the Euclidean distance that accounts for correlations among the X properties. It is calculated as the distance to the center of the training data. The larger the MD, the less trustworthy the prediction.

Mahalanobis Distance p-value: The p-value gives the fraction of training data with an MD greater than or equal to the one for the given sample, assuming normally distributed data. The smaller the p-value, the less trustworthy the prediction. For highly non-normal X properties (e.g., fingerprints), the MD p-value is wildly inaccurate.

## Structural Similar Compounds

| Name                        | b-Thioguanine deoxyriboside | 604     | 4,6-Diamino-2-(5-nitro-2-furyl)-S-triazine |
|-----------------------------|-----------------------------|---------|--------------------------------------------|
| Structure                   |                             |         |                                            |
| Actual Endpoint (-log C)    | 5.13004                     | 5.13004 | 5.11367                                    |
| Predicted Endpoint (-log C) | 4.82552                     | 4.96687 | 4.92048                                    |
| Distance                    | 0.605                       | 0.607   | 0.696                                      |
| Reference                   | CPDB                        | CPDB    | CPDB                                       |

## Model Applicability

Unknown features are fingerprint features in the query molecule, but not found in the training set.

1. All properties and OPS components are within expected ranges.

## Feature Contribution

### Top features for positive contribution

| Fingerprint | Bit/Smiles  | Feature Structure                         | Score |
|-------------|-------------|-------------------------------------------|-------|
| FCFP_6      | -1043250487 | <br><chem>[*]C@@H1[*]C@H([*])C@H1O</chem> | 1.153 |

|                                        |             |                                                                                                                         |        |
|----------------------------------------|-------------|-------------------------------------------------------------------------------------------------------------------------|--------|
| FCFP_6                                 | 1           | 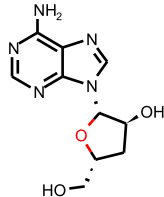<br><chem>[*]O[*]</chem>             | 0.234  |
| FCFP_6                                 | -1272798659 | <br><chem>[*][C@@H]1[*][*]CC1</chem> | 0.110  |
| Top Features for negative contribution |             |                                                                                                                         |        |
| Fingerprint                            | Bit/Smiles  | Feature Structure                                                                                                       | Score  |
| FCFP_6                                 | -1272709286 | <br><chem>[*]C([*])CO</chem>         | -0.526 |
| FCFP_6                                 | 16          | <br><chem>[*]:[cH]:[*]</chem>       | -0.354 |
| FCFP_6                                 | 17          | <br><chem>[*]:n:[*]</chem>         | -0.149 |





# Ribavirin

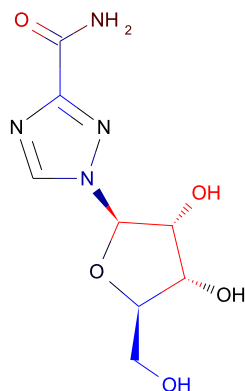

$C_8H_{12}N_4O_5$

Molecular Weight: 244.20467

ALogP: -2.745

Rotatable Bonds: 3

Acceptors: 7

Donors: 4

## Model Prediction

Prediction: 16.625

Unit: mg/kg\_body\_weight/day

Mahalanobis Distance: 10.582

Mahalanobis Distance p-value: 0.0578

Mahalanobis Distance: The Mahalanobis distance (MD) is a generalization of the Euclidean distance that accounts for correlations among the X properties. It is calculated as the distance to the center of the training data. The larger the MD, the less trustworthy the prediction.

Mahalanobis Distance p-value: The p-value gives the fraction of training data with an MD greater than or equal to the one for the given sample, assuming normally distributed data. The smaller the p-value, the less trustworthy the prediction. For highly non-normal X properties (e.g., fingerprints), the MD p-value is wildly inaccurate.

# TOPKAT\_Carcinogenic\_Potency\_TD50\_Rat

## Structural Similar Compounds

| Name                        | 604     | 5-Azacytidine | 720     |
|-----------------------------|---------|---------------|---------|
| Structure                   |         |               |         |
| Actual Endpoint (-log C)    | 5.13004 | 6.15731       | 6.15731 |
| Predicted Endpoint (-log C) | 4.96687 | 5.04824       | 5.04824 |
| Distance                    | 0.557   | 0.566         | 0.566   |
| Reference                   | CPDB    | CPDB          | CPDB    |

## Model Applicability

Unknown features are fingerprint features in the query molecule, but not found in the training set.

1. All properties and OPS components are within expected ranges.

## Feature Contribution

### Top features for positive contribution

| Fingerprint | Bit/Smiles  | Feature Structure                                | Score |
|-------------|-------------|--------------------------------------------------|-------|
| FCFP_6      | -1043250487 | <br><chem>*[C@@H]1[C@H](*)[C@H](*)[C@H]1O</chem> | 1.153 |

|                                        |             |                                                                                                                                   |        |
|----------------------------------------|-------------|-----------------------------------------------------------------------------------------------------------------------------------|--------|
| FCFP_6                                 | 1           | 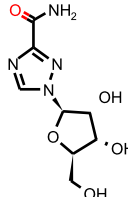<br><chem>[*]O[*]</chem>                       | 0.234  |
| FCFP_6                                 | -1043310069 | <br><chem>[*]C[C@H]1O[*]1[C@@H]1[C@@H]1</chem> | 0.085  |
| Top Features for negative contribution |             |                                                                                                                                   |        |
| Fingerprint                            | Bit/Smiles  | Feature Structure                                                                                                                 | Score  |
| FCFP_6                                 | -1272709286 | <br><chem>[*]C[*]CO</chem>                     | -0.526 |
| FCFP_6                                 | 16          | <br><chem>[*]:[cH]:[*]</chem>                | -0.354 |
| FCFP_6                                 | 17          | <br><chem>[*]:n:[*]</chem>                   | -0.149 |



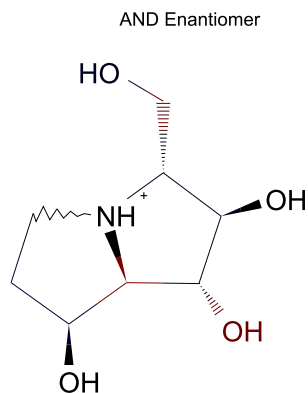

$C_8H_{16}NO_4$

Molecular Weight: 190.21693

ALogP: -3.556

Rotatable Bonds: 1

Acceptors: 4

Donors: 5

## Model Prediction

Prediction: 0.018

Unit: g/kg\_body\_weight

Mahalanobis Distance: 29.463

Mahalanobis Distance p-value: 1.1e-023

Mahalanobis Distance: The Mahalanobis distance (MD) is a generalization of the Euclidean distance that accounts for correlations among the X properties. It is calculated as the distance to the center of the training data. The larger the MD, the less trustworthy the prediction.

Mahalanobis Distance p-value: The p-value gives the fraction of training data with an MD greater than or equal to the one for the given sample, assuming normally distributed data. The smaller the p-value, the less trustworthy the prediction. For highly non-normal X properties (e.g., fingerprints), the MD p-value is wildly inaccurate.

## Structural Similar Compounds

| Name                        | L-ASCORBIC ACID | GLYPHOSATE                      | D-MANNITOL       |
|-----------------------------|-----------------|---------------------------------|------------------|
| Structure                   |                 |                                 |                  |
| Actual Endpoint (-log C)    | 1.84788         | 3.75094                         | 2.16357          |
| Predicted Endpoint (-log C) | 4.02723         | 3.64652                         | 2.8029           |
| Distance                    | 0.656           | 0.708                           | 0.731            |
| Reference                   | NTP 247 115     | EPA COVER SHEET 0057;891001;(1) | NTP REPORT # 236 |

## Model Applicability

Unknown features are fingerprint features in the query molecule, but not found in the training set.

1. All properties and OPS components are within expected ranges.
2. Unknown FCFP\_2 feature: 10: [\*][NH+]([\*])[\*]
3. Unknown FCFP\_2 feature: -1853714334: [\*][C@ @H]1[\*][\*][C@H]2[\*][\*][C][NH+]12
4. Unknown FCFP\_2 feature: -1817836174: [\*][C@H]1[\*][\*][NH+]2[\*][\*][C@H]([\*])C12
5. Unknown FCFP\_2 feature: 1155241219: [\*][NH+]1[\*][\*]CC1
6. Unknown ECFP\_6 feature: 1976330679: [\*][NH+]([\*])[\*]
7. Unknown ECFP\_6 feature: 2024749573: [\*]C([\*])O
8. Unknown ECFP\_6 feature: 2022454958: [\*]CO
9. Unknown ECFP\_6 feature: -1693770146: [\*][C@ @H]1[\*][\*][C@H]2[\*][\*][C][NH+]12
10. Unknown ECFP\_6 feature: -1395316370: [\*][C@H]1[\*][\*][NH+]2[\*][\*][C@H]([\*])C12
11. Unknown ECFP\_6 feature: -705668329: [\*]C[C@ @H]1[C@ @H]([\*])[\*][\*][NH+]1[\*]
12. Unknown ECFP\_6 feature: 305695353: [\*][C@ @H]1[\*][\*][C@H]([\*])C@H]1O
13. Unknown ECFP\_6 feature: -329826665: [\*][C@ @H]1[\*][\*][C][C@ @H]1O
14. Unknown ECFP\_6 feature: -244159614: [\*][NH+]1[\*][\*]CC1
15. Unknown ECFP\_6 feature: -85480422: [\*]C([\*])CO

## Feature Contribution

### Top features for positive contribution

| Fingerprint | Bit/Smiles | Feature Structure | Score |
|-------------|------------|-------------------|-------|
|-------------|------------|-------------------|-------|

| ECFP_6                                 | -167460056  | 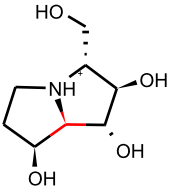<br><chem>[*]C([*])[*]</chem>         | 0.136  |
|----------------------------------------|-------------|--------------------------------------------------------------------------------------------------------------------------|--------|
| ECFP_6                                 | 1559650422  | <br><chem>[*]C[*]</chem>              | 0.129  |
| FCFP_6                                 | 3           | <br><chem>[*]O</chem>                 | 0.092  |
| Top Features for negative contribution |             |                                                                                                                          |        |
| Fingerprint                            | Bit/Smiles  | Feature Structure                                                                                                        | Score  |
| ECFP_6                                 | -1331450522 | <br><chem>[*]C@@H]1[*][*]CC1</chem> | -0.054 |
| FCFP_6                                 | -1272709286 | <br><chem>[*]C([*])CO</chem>        | -0.031 |

FCFP\_6

-1043250487

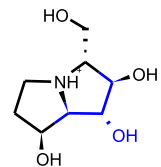

[\*][C@@H]1[\*][\*][C@H]  
([\*])[C@H]1O

-0.027

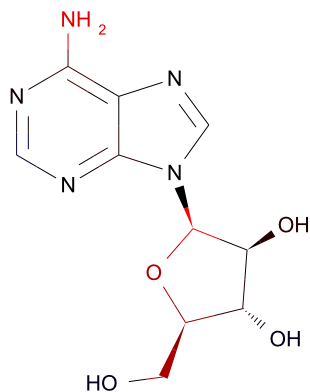
 $C_{10}H_{13}N_5O_4$ 

Molecular Weight: 267.24132

ALogP: -1.881

Rotatable Bonds: 2

Acceptors: 8

Donors: 4

## Model Prediction

Prediction: 0.010

Unit: g/kg\_body\_weight

Mahalanobis Distance: 44.555

Mahalanobis Distance p-value: 1.76e-049

Mahalanobis Distance: The Mahalanobis distance (MD) is a generalization of the Euclidean distance that accounts for correlations among the X properties. It is calculated as the distance to the center of the training data. The larger the MD, the less trustworthy the prediction.

Mahalanobis Distance p-value: The p-value gives the fraction of training data with an MD greater than or equal to the one for the given sample, assuming normally distributed data. The smaller the p-value, the less trustworthy the prediction. For highly non-normal X properties (e.g., fingerprints), the MD p-value is wildly inaccurate.

## Structural Similar Compounds

| Name                        | C.I. DISPERSE BLUE I | AMPICILLIN TRIHYDRATE | AMILORIDE |
|-----------------------------|----------------------|-----------------------|-----------|
| Structure                   |                      |                       |           |
| Actual Endpoint (-log C)    | 3.6327               | 2.81416               | 4.75896   |
| Predicted Endpoint (-log C) | 3.26657              | 3.59519               | 3.54686   |
| Distance                    | 0.658                | 0.703                 | 0.703     |
| Reference                   | NTP REPORT # 299     | NTP REPORT # 318      | NDA-18201 |

## Model Applicability

Unknown features are fingerprint features in the query molecule, but not found in the training set.

1. All properties and OPS components are within expected ranges.
2. Unknown ECFP\_6 feature: 672362763: [\*]n(:[\*]):[\*]
3. Unknown ECFP\_6 feature: -677309799: [\*]c(:[\*]):n:[cH]:[\*]
4. Unknown ECFP\_6 feature: -710237522: [\*]:n:[cH]:n:[\*]
5. Unknown ECFP\_6 feature: 1049075205: [\*]n1:[\*]:[\*]:c(:[\*]):c:1:n:[\*]
6. Unknown ECFP\_6 feature: 1048320787: [\*]c(:[\*]):c:1:n:[\*]:[\*]:c:1:[\*]
7. Unknown ECFP\_6 feature: -1734834311: [\*]:n:[c](N):[c](:[\*]):[\*]
8. Unknown ECFP\_6 feature: -938530932: [\*]:c(:[\*])N
9. Unknown ECFP\_6 feature: -1219098860: [\*]C([\*])n1:[cH]:[\*]:[\*]:c:1:[\*]
10. Unknown ECFP\_6 feature: -708878603: [\*]n1:[\*]:[\*]:n:[cH]:1
11. Unknown ECFP\_6 feature: 125442029: [\*][C@H]1[\*][\*]O[C@H]1n(:[\*]):[\*]
12. Unknown ECFP\_6 feature: -1409796893: [\*][C@H]1[\*][\*][C@H]([\*])O1
13. Unknown ECFP\_6 feature: -553149446: [\*][C@H]1O[\*][\*][C@H]1[\*]
14. Unknown ECFP\_6 feature: 305695353: [\*][C@H]1[\*][\*][C@H]([\*])[C@H]1O
15. Unknown ECFP\_6 feature: 2024749573: [\*]C([\*])O
16. Unknown ECFP\_6 feature: -85480422: [\*]C([\*])CO
17. Unknown ECFP\_6 feature: 2022454958: [\*]CO

## Feature Contribution

Top features for positive contribution



| Fingerprint                            | Bit/Smiles  | Feature Structure                                                                                                                | Score  |
|----------------------------------------|-------------|----------------------------------------------------------------------------------------------------------------------------------|--------|
| ECFP_6                                 | -167460056  | 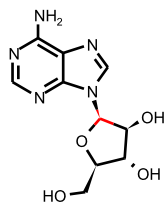<br><chem>[*]C([*])[*]</chem>                 | 0.136  |
| FCFP_6                                 | -1143715940 | <br><chem>[*][C@@H]1[*][*][C@H]1([*])O</chem> | 0.130  |
| ECFP_6                                 | 1559650422  | <br><chem>[*]C[*]</chem>                      | 0.129  |
| Top Features for negative contribution |             |                                                                                                                                  |        |
| Fingerprint                            | Bit/Smiles  | Feature Structure                                                                                                                | Score  |
| FCFP_6                                 | 1           | <br><chem>[*]O[*]</chem>                    | -0.102 |
|                                        |             |                                                                                                                                  |        |

|        |             |                                                                                                                  |        |
|--------|-------------|------------------------------------------------------------------------------------------------------------------|--------|
| FCFP_6 | 16          | 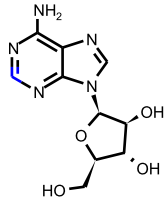<br><chem>[*]:[cH]:[*]</chem> | -0.046 |
| FCFP_6 | -1272709286 | <br><chem>[*]C([*])CO</chem>  | -0.031 |

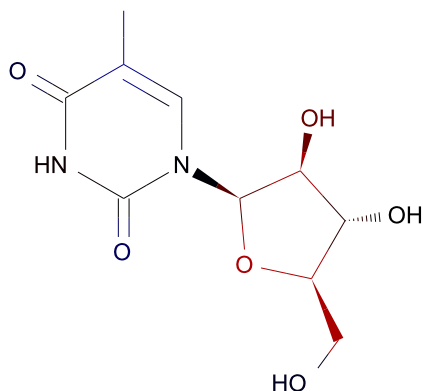

$C_{10}H_{14}N_2O_6$

Molecular Weight: 258.22795

ALogP: -2.005

Rotatable Bonds: 2

Acceptors: 6

Donors: 4

## Model Prediction

Prediction: 0.009

Unit: g/kg\_body\_weight

Mahalanobis Distance: 38.315

Mahalanobis Distance p-value: 2.4e-039

Mahalanobis Distance: The Mahalanobis distance (MD) is a generalization of the Euclidean distance that accounts for correlations among the X properties. It is calculated as the distance to the center of the training data. The larger the MD, the less trustworthy the prediction.

Mahalanobis Distance p-value: The p-value gives the fraction of training data with an MD greater than or equal to the one for the given sample, assuming normally distributed data. The smaller the p-value, the less trustworthy the prediction. For highly non-normal X properties (e.g., fingerprints), the MD p-value is wildly inaccurate.

## Structural Similar Compounds

| Name                        | L-ASCORBIC ACID | AMPICILLIN TRIHYDRATE | GLYPHOSATE                      |
|-----------------------------|-----------------|-----------------------|---------------------------------|
| Structure                   |                 |                       |                                 |
| Actual Endpoint (-log C)    | 1.84788         | 2.81416               | 3.75094                         |
| Predicted Endpoint (-log C) | 4.02723         | 3.59519               | 3.64652                         |
| Distance                    | 0.544           | 0.682                 | 0.705                           |
| Reference                   | NTP 247 115     | NTP REPORT # 318      | EPA COVER SHEET 0057;891001;(1) |

## Model Applicability

Unknown features are fingerprint features in the query molecule, but not found in the training set.

1. All properties and OPS components are within expected ranges.
2. Unknown ECFP\_6 feature: -154530762: [\*]N[\*]
3. Unknown ECFP\_6 feature: -1409796893: [\*][C@@H]1[\*][\*][C@H]([\*])O1
4. Unknown ECFP\_6 feature: 2024749573: [\*]C([\*])O
5. Unknown ECFP\_6 feature: 2022454958: [\*]CO
6. Unknown ECFP\_6 feature: -1811420270: [\*]C([\*])N(C=[\*])C([\*])[\*]
7. Unknown ECFP\_6 feature: -1699286547: [\*]C([\*])NC([\*])[\*]
8. Unknown ECFP\_6 feature: 305695353: [\*][C@@H]1[\*][\*][C@H]([\*])[C@H]1O
9. Unknown ECFP\_6 feature: -627157165: [\*][C@H]1[\*][\*]O[C@H]1N([\*])[\*]
10. Unknown ECFP\_6 feature: -553149446: [\*]C[C@H]1O[\*][\*][C@@H]1[\*]
11. Unknown ECFP\_6 feature: -85480422: [\*]C([\*])CO
12. Unknown ECFP\_6 feature: 471356069: [\*]N([\*])C=C([\*])[\*]
13. Unknown ECFP\_6 feature: 1526392165: [\*]NC(=O)N([\*])[\*]
14. Unknown ECFP\_6 feature: -3067141: [\*]C=C(\C)/C([\*])[\*]
15. Unknown ECFP\_6 feature: 1298725959: [\*]NC(=O)C([\*])[\*]

## Feature Contribution

### Top features for positive contribution

| Fingerprint | Bit/Smiles | Feature Structure | Score |
|-------------|------------|-------------------|-------|
|-------------|------------|-------------------|-------|

| ECFP_6                                 | -167460056  | 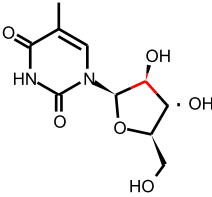<br><chem>[*]C([*])[*]</chem>                 | 0.136  |
|----------------------------------------|-------------|----------------------------------------------------------------------------------------------------------------------------------|--------|
| FCFP_6                                 | -1143715940 | <br><chem>[*][C@@H]1[*][*][C@H]([*])O1</chem> | 0.130  |
| ECFP_6                                 | 1559650422  | <br><chem>[*]C[*]</chem>                      | 0.129  |
| Top Features for negative contribution |             |                                                                                                                                  |        |
| Fingerprint                            | Bit/Smiles  | Feature Structure                                                                                                                | Score  |
| ECFP_6                                 | 2106656448  | <br><chem>[*]C(=O)[*]</chem>                 | -0.110 |
| FCFP_6                                 | 1           | <br><chem>[*]O[*]</chem>                    | -0.102 |

|        |           |                                                                                                                 |        |
|--------|-----------|-----------------------------------------------------------------------------------------------------------------|--------|
| FCFP_6 | 136597326 | 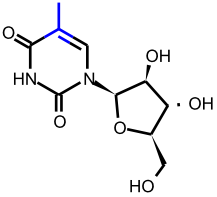<br><chem>[*]C(=[*])C</chem> | -0.081 |
|--------|-----------|-----------------------------------------------------------------------------------------------------------------|--------|

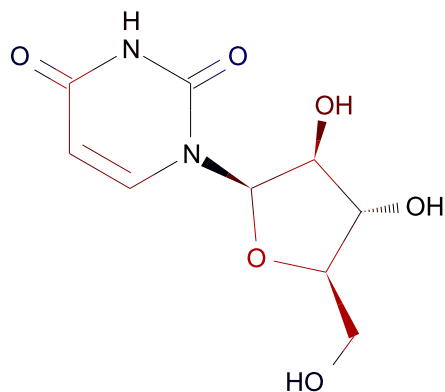

$C_9H_{12}N_2O_6$

Molecular Weight: 244.20137

ALogP: -2.451

Rotatable Bonds: 2

Acceptors: 6

Donors: 4

## Model Prediction

Prediction: 0.006

Unit: g/kg\_body\_weight

Mahalanobis Distance: 35.673

Mahalanobis Distance p-value: 8.25e-035

Mahalanobis Distance: The Mahalanobis distance (MD) is a generalization of the Euclidean distance that accounts for correlations among the X properties. It is calculated as the distance to the center of the training data. The larger the MD, the less trustworthy the prediction.

Mahalanobis Distance p-value: The p-value gives the fraction of training data with an MD greater than or equal to the one for the given sample, assuming normally distributed data. The smaller the p-value, the less trustworthy the prediction. For highly non-normal X properties (e.g., fingerprints), the MD p-value is wildly inaccurate.

## Structural Similar Compounds

| Name                        | L-ASCORBIC ACID | GLYPHOSATE                      | AMPICILLIN TRIHYDRATE |
|-----------------------------|-----------------|---------------------------------|-----------------------|
| Structure                   |                 |                                 |                       |
| Actual Endpoint (-log C)    | 1.84788         | 3.75094                         | 2.81416               |
| Predicted Endpoint (-log C) | 4.02723         | 3.64652                         | 3.59519               |
| Distance                    | 0.527           | 0.660                           | 0.701                 |
| Reference                   | NTP 247 115     | EPA COVER SHEET 0057;891001;(1) | NTP REPORT # 318      |

## Model Applicability

Unknown features are fingerprint features in the query molecule, but not found in the training set.

1. All properties and OPS components are within expected ranges.
2. Unknown ECFP\_6 feature: -154530762: [\*]N[\*]
3. Unknown ECFP\_6 feature: -1409796893: [\*][C@@H]1[\*][\*][C@H]([\*])O1
4. Unknown ECFP\_6 feature: 2024749573: [\*]C([\*])O
5. Unknown ECFP\_6 feature: 2022454958: [\*]CO
6. Unknown ECFP\_6 feature: -1811420270: [\*]C([\*])N(C=[\*])C(=[\*])[\*]
7. Unknown ECFP\_6 feature: -1699286547: [\*]C(=[\*])NC(=[\*])[\*]
8. Unknown ECFP\_6 feature: 305695353: [\*][C@@H]1[\*][\*][C@H]([\*])[C@H]1O
9. Unknown ECFP\_6 feature: -627157165: [\*][C@H]1[\*][\*]O[C@H]1N([\*])[\*]
10. Unknown ECFP\_6 feature: -553149446: [\*]C[C@H]1O[\*][\*][C@H]1[\*]
11. Unknown ECFP\_6 feature: -85480422: [\*]C([\*])CO
12. Unknown ECFP\_6 feature: 1526392165: [\*]NC(=O)N([\*])[\*]
13. Unknown ECFP\_6 feature: 935510419: [\*]C=C/N([\*])[\*]
14. Unknown ECFP\_6 feature: 1745066357: [\*]C=C/C(=[\*])[\*]
15. Unknown ECFP\_6 feature: -867415197: [\*]NC(=O)C=[\*]

## Feature Contribution

### Top features for positive contribution

| Fingerprint | Bit/Smiles | Feature Structure | Score |
|-------------|------------|-------------------|-------|
|-------------|------------|-------------------|-------|

|                                        |             |                                                                                                                                  |        |
|----------------------------------------|-------------|----------------------------------------------------------------------------------------------------------------------------------|--------|
| FCFP_6                                 | 451847724   | 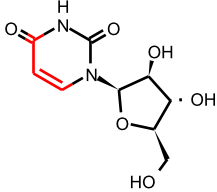<br><chem>[*]C=C/C(=[*])[*]</chem>            | 0.160  |
| ECFP_6                                 | -167460056  | <br><chem>[*]C([*])[*]</chem>                 | 0.136  |
| FCFP_6                                 | -1143715940 | <br><chem>[*][C@@H]1[*][*][C@H]([*])O1</chem> | 0.130  |
| Top Features for negative contribution |             |                                                                                                                                  |        |
| Fingerprint                            | Bit/Smiles  | Feature Structure                                                                                                                | Score  |
| ECFP_6                                 | 2106656448  | <br><chem>[*]C(=O)[*]</chem>                | -0.110 |
| FCFP_6                                 | 1           | <br><chem>[*]O[*]</chem>                    | -0.102 |

|        |           |                                                                                                                                                                                                                                                                                                                                                                                                                                               |        |
|--------|-----------|-----------------------------------------------------------------------------------------------------------------------------------------------------------------------------------------------------------------------------------------------------------------------------------------------------------------------------------------------------------------------------------------------------------------------------------------------|--------|
| FCFP_6 | 566058135 | 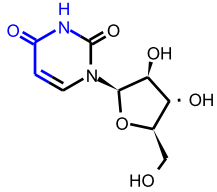 <p>Chemical structure of 2-(2,3,5-trihydroxypropyl)-2H-pyrimidin-4(1H)-one. The structure shows a pyrimidine ring with a carbonyl group at position 4 and a hydroxyl group at position 2. The nitrogen at position 1 is substituted with a 2,3,5-trihydroxypropyl group. The pyrimidine ring is highlighted in blue.</p> <chem>[*]NC(=O)C(=[*])[*]</chem> | -0.056 |
|--------|-----------|-----------------------------------------------------------------------------------------------------------------------------------------------------------------------------------------------------------------------------------------------------------------------------------------------------------------------------------------------------------------------------------------------------------------------------------------------|--------|



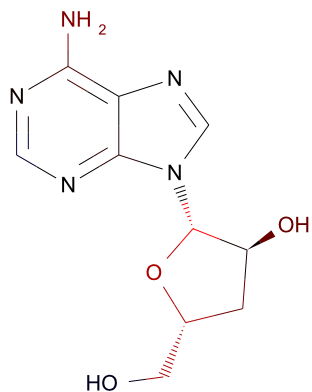

$C_{10}H_{13}N_5O_3$

Molecular Weight: 251.24191

ALogP: -1.308

Rotatable Bonds: 2

Acceptors: 7

Donors: 3

## Model Prediction

Prediction: 0.004

Unit: g/kg\_body\_weight

Mahalanobis Distance: 45.467

Mahalanobis Distance p-value: 6.83e-051

Mahalanobis Distance: The Mahalanobis distance (MD) is a generalization of the Euclidean distance that accounts for correlations among the X properties. It is calculated as the distance to the center of the training data. The larger the MD, the less trustworthy the prediction.

Mahalanobis Distance p-value: The p-value gives the fraction of training data with an MD greater than or equal to the one for the given sample, assuming normally distributed data. The smaller the p-value, the less trustworthy the prediction. For highly non-normal X properties (e.g., fingerprints), the MD p-value is wildly inaccurate.

## Structural Similar Compounds

| Name                        | TRIAMTERENE      | HYDROCHLOROTHIAZID E | PIROXICAM |
|-----------------------------|------------------|----------------------|-----------|
| Structure                   |                  |                      |           |
| Actual Endpoint (-log C)    | 4.40358          | 4.37691              | 5.52028   |
| Predicted Endpoint (-log C) | 3.6657           | 3.84479              | 4.06087   |
| Distance                    | 0.660            | 0.683                | 0.690     |
| Reference                   | NTP REPORT # 420 | NTP REPORT # 357     | NDA-18147 |

## Model Applicability

Unknown features are fingerprint features in the query molecule, but not found in the training set.

1. All properties and OPS components are within expected ranges.
2. Unknown ECFP\_6 feature: 672362763: [\*]n(:[\*]):[\*]
3. Unknown ECFP\_6 feature: -677309799: [\*][c](:[\*]):n:[cH]:[\*]
4. Unknown ECFP\_6 feature: -710237522: [\*]:n:[cH]:n:[\*]
5. Unknown ECFP\_6 feature: 1049075205: [\*]n1:[\*]:[\*]:[c](:[\*]):[c]:1:n:[\*]
6. Unknown ECFP\_6 feature: 1048320787: [\*][c](:[\*]):[c]1:n:[\*]:[\*]:[c]:1:[\*]
7. Unknown ECFP\_6 feature: -1734834311: [\*]:n:[c](N):[c](:[\*]):[\*]
8. Unknown ECFP\_6 feature: -1219098860: [\*]C(\*)n1:[cH]:[\*]:[\*]:[c]:1:[\*]
9. Unknown ECFP\_6 feature: -708878603: [\*]n1:[\*]:[\*]:n:[cH]:1
10. Unknown ECFP\_6 feature: 125442029: [\*][C@H]1[\*][\*]O[C@H]1n(:[\*]):[\*]
11. Unknown ECFP\_6 feature: -1409796893: [\*][C@ @H]1[\*][\*][C@H]1(\*)O1
12. Unknown ECFP\_6 feature: -554480104: [\*]C[C@H]1C[\*][\*]O1
13. Unknown ECFP\_6 feature: -801490360: [\*][C@ @H]1[\*][\*][C@ @H]1(\*)C1
14. Unknown ECFP\_6 feature: -329826665: [\*][C@ @H]1[\*][\*]C[C@ @H]1O
15. Unknown ECFP\_6 feature: 2024749573: [\*]C(\*)O
16. Unknown ECFP\_6 feature: -85480422: [\*]C(\*)CO
17. Unknown ECFP\_6 feature: 2022454958: [\*]CO
18. Unknown ECFP\_6 feature: -938530932: [\*]:[c](:[\*])N

## Feature Contribution

| Top features for positive contribution |             |                                                                                                                                 |        |
|----------------------------------------|-------------|---------------------------------------------------------------------------------------------------------------------------------|--------|
| Fingerprint                            | Bit/Smiles  | Feature Structure                                                                                                               | Score  |
| ECFP_6                                 | -167460056  | 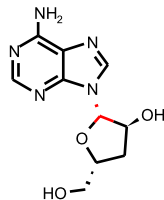<br><chem>[*]C([*])[*]</chem>                | 0.136  |
| FCFP_6                                 | -1143715940 | <br><chem>[*][C@@H]1[*][*][C@H](1*)O1</chem> | 0.130  |
| ECFP_6                                 | 1559650422  | <br><chem>[*]C[*]</chem>                     | 0.129  |
| Top Features for negative contribution |             |                                                                                                                                 |        |
| Fingerprint                            | Bit/Smiles  | Feature Structure                                                                                                               | Score  |
| FCFP_6                                 | 1           | <br><chem>[*]O[*]</chem>                   | -0.102 |
|                                        |             |                                                                                                                                 |        |

|        |             |                                                                                                                  |        |
|--------|-------------|------------------------------------------------------------------------------------------------------------------|--------|
| FCFP_6 | 16          | 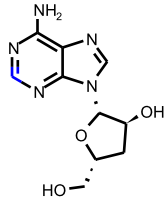<br><chem>[*]:[cH]:[*]</chem> | -0.046 |
| FCFP_6 | -1272709286 | <br><chem>[*]C([*])CO</chem>  | -0.031 |

# Ribavirin

# TOPKAT\_Chronic\_LOAEL

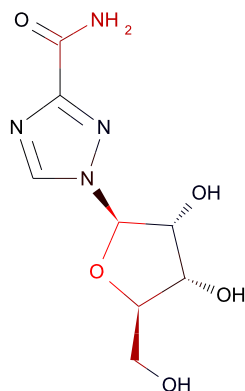

$C_8H_{12}N_4O_5$

Molecular Weight: 244.20467

ALogP: -2.745

Rotatable Bonds: 3

Acceptors: 7

Donors: 4

## Model Prediction

Prediction: 0.013

Unit: g/kg\_body\_weight

Mahalanobis Distance: 42.536

Mahalanobis Distance p-value: 2.71e-046

Mahalanobis Distance: The Mahalanobis distance (MD) is a generalization of the Euclidean distance that accounts for correlations among the X properties. It is calculated as the distance to the center of the training data. The larger the MD, the less trustworthy the prediction.

Mahalanobis Distance p-value: The p-value gives the fraction of training data with an MD greater than or equal to the one for the given sample, assuming normally distributed data. The smaller the p-value, the less trustworthy the prediction. For highly non-normal X properties (e.g., fingerprints), the MD p-value is wildly inaccurate.

## Structural Similar Compounds

| Name                        | AMILORIDE | AMPICILLIN TRIHYDRATE | L-ASCORBIC ACID |
|-----------------------------|-----------|-----------------------|-----------------|
| Structure                   |           |                       |                 |
| Actual Endpoint (-log C)    | 4.75896   | 2.81416               | 1.84788         |
| Predicted Endpoint (-log C) | 3.54686   | 3.59519               | 4.02723         |
| Distance                    | 0.638     | 0.648                 | 0.688           |
| Reference                   | NDA-18201 | NTP REPORT # 318      | NTP 247 115     |

## Model Applicability

Unknown features are fingerprint features in the query molecule, but not found in the training set.

- All properties and OPS components are within expected ranges.
- Unknown ECFP\_6 feature: 672362763: [\*]n(:[\*]):[\*]
- Unknown ECFP\_6 feature: -1142718401: [\*]C([\*])n1:[cH]:[\*]:[\*]:n:1
- Unknown ECFP\_6 feature: 835630791: [\*]n1:[\*]:[\*]:[c]([\*]):n:1
- Unknown ECFP\_6 feature: 1128080580: [\*]C(=[\*])[c]1:n:[\*]:[\*]:n:1
- Unknown ECFP\_6 feature: -677309799: [\*][c](:[\*]):n:[cH]:[\*]
- Unknown ECFP\_6 feature: -708878603: [\*]n1:[\*]:[\*]:n:[cH]:1
- Unknown ECFP\_6 feature: 852414842: [\*]:[c](:[\*])C(=O)N
- Unknown ECFP\_6 feature: -932108170: [\*]C(=[\*])N
- Unknown ECFP\_6 feature: -1409796893: [\*][C@ @H]1[\*][\*][C@H]([\*])O1
- Unknown ECFP\_6 feature: 125442029: [\*][C@H]1[\*][\*]O[C@H]1n(:[\*]):[\*]
- Unknown ECFP\_6 feature: 305695353: [\*][C@ @H]1[\*][\*][C@H]([\*])[C@H]1O
- Unknown ECFP\_6 feature: -553149446: [\*]C[C@H]1O[\*][\*][C@ @H]1[\*]
- Unknown ECFP\_6 feature: -85480422: [\*]C([\*])CO
- Unknown ECFP\_6 feature: 2022454958: [\*]CO
- Unknown ECFP\_6 feature: 2024749573: [\*]C([\*])O

## Feature Contribution

### Top features for positive contribution

| Fingerprint | Bit/Smiles | Feature Structure | Score |
|-------------|------------|-------------------|-------|
|-------------|------------|-------------------|-------|

|                                        |             |                                                                                                                                 |        |
|----------------------------------------|-------------|---------------------------------------------------------------------------------------------------------------------------------|--------|
| ECFP_6                                 | -167460056  | 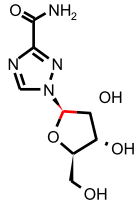<br><chem>[*]C([*])[*]</chem>                | 0.136  |
| FCFP_6                                 | -1143715940 | <br><chem>[*][C@@H]1[*][*][C@H](1*)O1</chem> | 0.130  |
| ECFP_6                                 | 1559650422  | <br><chem>[*]C[*]</chem>                     | 0.129  |
| Top Features for negative contribution |             |                                                                                                                                 |        |
| Fingerprint                            | Bit/Smiles  | Feature Structure                                                                                                               | Score  |
| FCFP_6                                 | 1           | <br><chem>[*]O[*]</chem>                    | -0.102 |
| FCFP_6                                 | 16          | <br><chem>[*]:[cH]:[*]</chem>              | -0.046 |

|        |             |                                                                                                                |        |
|--------|-------------|----------------------------------------------------------------------------------------------------------------|--------|
| FCFP_6 | -1272709286 | 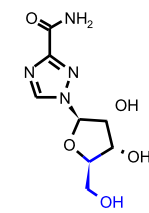<br><chem>[*]C([*])CO</chem> | -0.031 |
|--------|-------------|----------------------------------------------------------------------------------------------------------------|--------|

AND Enantiomer

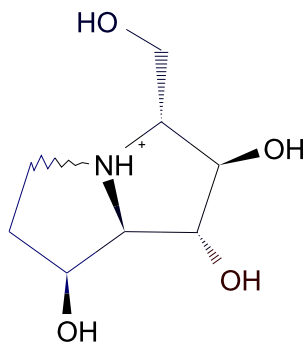 $C_8H_{16}NO_4$ 

Molecular Weight: 190.21693

ALogP: -3.556

Rotatable Bonds: 1

Acceptors: 4

Donors: 5

## Model Prediction

Prediction: 0.191

Unit: g/kg\_body\_weight

Mahalanobis Distance: 8.310

Mahalanobis Distance p-value: 0.0109

Mahalanobis Distance: The Mahalanobis distance (MD) is a generalization of the Euclidean distance that accounts for correlations among the X properties. It is calculated as the distance to the center of the training data. The larger the MD, the less trustworthy the prediction.

Mahalanobis Distance p-value: The p-value gives the fraction of training data with an MD greater than or equal to the one for the given sample, assuming normally distributed data. The smaller the p-value, the less trustworthy the prediction. For highly non-normal X properties (e.g., fingerprints), the MD p-value is wildly inaccurate.

## Structural Similar Compounds

| Name                        | D-MANNITOL     | L-ASORBIC ACID | DIETHANOLAMINE |
|-----------------------------|----------------|----------------|----------------|
| Structure                   |                |                |                |
| Actual Endpoint (-log C)    | 1.9083         | 1.89364        | 3.32279        |
| Predicted Endpoint (-log C) | 2.52388        | 2.56611        | 2.92091        |
| Distance                    | 0.651          | 0.670          | 0.791          |
| Reference                   | NCI/NTP TR-236 | NCI/NTP TR-247 | NCI/NTP TR-478 |

## Model Applicability

Unknown features are fingerprint features in the query molecule, but not found in the training set.

1. OPS PC3 out of range. Value: -5.7487. Training min, max, SD, explained variance: -5.5951, 5.5124, 2.075, 0.0973.
2. Unknown FCFP\_2 feature: 10: [\*][NH+]([\*])[\*]
3. Unknown FCFP\_2 feature: -1853714334: [\*][C@@H]1[\*][\*][C@H]2[\*][\*]C[NH+]12
4. Unknown FCFP\_2 feature: -1817836174: [\*][C@H]1[\*][\*][NH+]2[\*][\*][C@H]([\*])C12
5. Unknown FCFP\_2 feature: 1155241219: [\*][NH+]1[\*][\*]CC1

## Feature Contribution

### Top features for positive contribution

| Fingerprint | Bit/Smiles | Feature Structure     | Score |
|-------------|------------|-----------------------|-------|
| FCFP_2      | 3          | <br><chem>[*]O</chem> | 0.074 |

### Top Features for negative contribution

| Fingerprint | Bit/Smiles  | Feature Structure                                                                                                       | Score  |
|-------------|-------------|-------------------------------------------------------------------------------------------------------------------------|--------|
| FCFP_2      | -1272798659 | 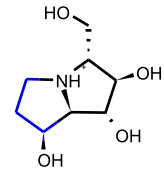<br><chem>[*][C@@H]1[*][*]CC1</chem> | -0.111 |
| FCFP_2      | -1272709286 | <br><chem>[*]C([*])CO</chem>         | -0.049 |
| FCFP_2      | 0           | <br><chem>[*]C([*])[*]</chem>        | -0.031 |



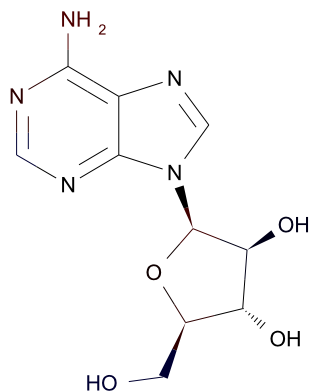

$C_{10}H_{13}N_5O_4$

Molecular Weight: 267.24132

ALogP: -1.881

Rotatable Bonds: 2

Acceptors: 8

Donors: 4

## Model Prediction

Prediction: 0.175

Unit: g/kg\_body\_weight

Mahalanobis Distance: 10.106

Mahalanobis Distance p-value: 2.99e-005

Mahalanobis Distance: The Mahalanobis distance (MD) is a generalization of the Euclidean distance that accounts for correlations among the X properties. It is calculated as the distance to the center of the training data. The larger the MD, the less trustworthy the prediction.

Mahalanobis Distance p-value: The p-value gives the fraction of training data with an MD greater than or equal to the one for the given sample, assuming normally distributed data. The smaller the p-value, the less trustworthy the prediction. For highly non-normal X properties (e.g., fingerprints), the MD p-value is wildly inaccurate.

## Structural Similar Compounds

| Name                        | 50%1,4,5,8-TETRAAMINOANTHRAQUIONONE + DERIVATIVES | TRIAMTERENE    | MELAMINE       |
|-----------------------------|---------------------------------------------------|----------------|----------------|
| Structure                   |                                                   |                |                |
| Actual Endpoint (-log C)    | 3.0764                                            | 4.00564        | 2.40182        |
| Predicted Endpoint (-log C) | 3.08142                                           | 3.1992         | 3.01288        |
| Distance                    | 0.664                                             | 0.699          | 0.796          |
| Reference                   | NCI/NTP TR-299                                    | NCI/NTP TR-420 | NCI/NTP TR-245 |

## Model Applicability

Unknown features are fingerprint features in the query molecule, but not found in the training set.

1. All properties and OPS components are within expected ranges.
2. Unknown FCFP\_2 feature: -124685461: [\*]:n:c:n:[\*]
3. Unknown FCFP\_2 feature: -306856457: [\*]C([\*])n1:[c]([\*]):[\*]:[\*]:c:1
4. Unknown FCFP\_2 feature: 1315416442: [\*][C@H]1[\*][\*]O[C@H]1n(:[\*]):[\*]

## Feature Contribution

### Top features for positive contribution

| Fingerprint | Bit/Smiles  | Feature Structure                               | Score |
|-------------|-------------|-------------------------------------------------|-------|
| FCFP_2      | -1143715940 | <p><chem>*[C@@H]1[*][*][C@H]1([*])O1</chem></p> | 0.095 |

|                                        |             |                                                                                                       |        |
|----------------------------------------|-------------|-------------------------------------------------------------------------------------------------------|--------|
| FCFP_2                                 | 3           | 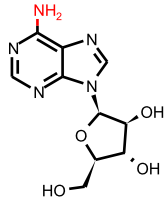<br>[*]O           | 0.074  |
| FCFP_2                                 | 17          | <br>[*]:n:[*]      | 0.044  |
| Top Features for negative contribution |             |                                                                                                       |        |
| Fingerprint                            | Bit/Smiles  | Feature Structure                                                                                     | Score  |
| FCFP_2                                 | 1           | <br>[*]O[*]        | -0.080 |
| FCFP_2                                 | 16          | <br>[*]:[cH]:[*] | -0.051 |
| FCFP_2                                 | -1272709286 | <br>[*]C([*])CO  | -0.049 |



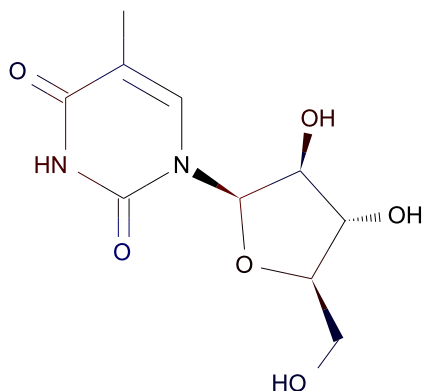

$C_{10}H_{14}N_2O_6$

Molecular Weight: 258.22795

ALogP: -2.005

Rotatable Bonds: 2

Acceptors: 6

Donors: 4

## Model Prediction

Prediction: 0.095

Unit: g/kg\_body\_weight

Mahalanobis Distance: 8.873

Mahalanobis Distance p-value: 0.00211

Mahalanobis Distance: The Mahalanobis distance (MD) is a generalization of the Euclidean distance that accounts for correlations among the X properties. It is calculated as the distance to the center of the training data. The larger the MD, the less trustworthy the prediction.

Mahalanobis Distance p-value: The p-value gives the fraction of training data with an MD greater than or equal to the one for the given sample, assuming normally distributed data. The smaller the p-value, the less trustworthy the prediction. For highly non-normal X properties (e.g., fingerprints), the MD p-value is wildly inaccurate.

## Structural Similar Compounds

| Name                        | L-ASORBIC ACID | METHYLDOPA SESQUIHYDRATE | HYDROCHLOROTHIAZIDE |
|-----------------------------|----------------|--------------------------|---------------------|
| Structure                   |                |                          |                     |
| Actual Endpoint (-log C)    | 1.89364        | 2.94452                  | 3.56001             |
| Predicted Endpoint (-log C) | 2.56611        | 2.32114                  | 3.55045             |
| Distance                    | 0.435          | 0.644                    | 0.733               |
| Reference                   | NCI/NTP TR-247 | NCI/NTP TR-348           | NCI/NTP TR-357      |

## Model Applicability

Unknown features are fingerprint features in the query molecule, but not found in the training set.

1. All properties and OPS components are within expected ranges.

## Feature Contribution

### Top features for positive contribution

| Fingerprint | Bit/Smiles | Feature Structure                      | Score |
|-------------|------------|----------------------------------------|-------|
| FCFP_2      | -885550502 | <br><chem>[*]C(=[*])NC(=[*])[*]</chem> | 0.115 |

|                                        |             |                                                                                                                           |        |
|----------------------------------------|-------------|---------------------------------------------------------------------------------------------------------------------------|--------|
| FCFP_2                                 | -1143715940 | 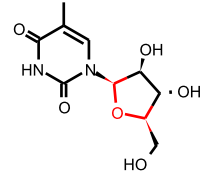<br><chem>[*]C@@H1[*]([*]C@H)O1</chem> | 0.095  |
| FCFP_2                                 | 3           | <br><chem>[*]O</chem>                  | 0.074  |
| Top Features for negative contribution |             |                                                                                                                           |        |
| Fingerprint                            | Bit/Smiles  | Feature Structure                                                                                                         | Score  |
| FCFP_2                                 | 1872154524  | <br><chem>[*]C(=O)[*]</chem>           | -0.105 |
| FCFP_2                                 | 1           | <br><chem>[*]O[*]</chem>             | -0.080 |
| FCFP_2                                 | -1272709286 | <br><chem>[*]C([*])CO</chem>         | -0.049 |



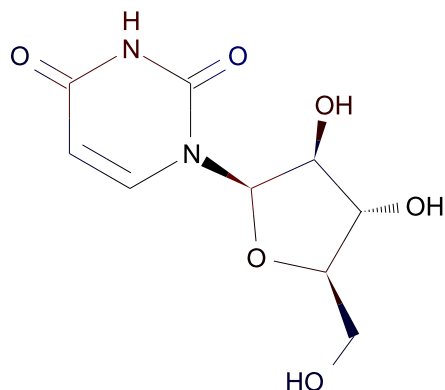

$C_9H_{12}N_2O_6$

Molecular Weight: 244.20137

ALogP: -2.451

Rotatable Bonds: 2

Acceptors: 6

Donors: 4

## Model Prediction

Prediction: 0.094

Unit: g/kg\_body\_weight

Mahalanobis Distance: 8.623

Mahalanobis Distance p-value: 0.00448

Mahalanobis Distance: The Mahalanobis distance (MD) is a generalization of the Euclidean distance that accounts for correlations among the X properties. It is calculated as the distance to the center of the training data. The larger the MD, the less trustworthy the prediction.

Mahalanobis Distance p-value: The p-value gives the fraction of training data with an MD greater than or equal to the one for the given sample, assuming normally distributed data. The smaller the p-value, the less trustworthy the prediction. For highly non-normal X properties (e.g., fingerprints), the MD p-value is wildly inaccurate.

## Structural Similar Compounds

| Name                        | L-ASORBIC ACID | METHYLDOPA SESQUIHYDRATE | D-MANNITOL     |
|-----------------------------|----------------|--------------------------|----------------|
| Structure                   |                |                          |                |
| Actual Endpoint (-log C)    | 1.89364        | 2.94452                  | 1.9083         |
| Predicted Endpoint (-log C) | 2.56611        | 2.32114                  | 2.52388        |
| Distance                    | 0.417          | 0.663                    | 0.711          |
| Reference                   | NCI/NTP TR-247 | NCI/NTP TR-348           | NCI/NTP TR-236 |

## Model Applicability

Unknown features are fingerprint features in the query molecule, but not found in the training set.

1. All properties and OPS components are within expected ranges.

## Feature Contribution

### Top features for positive contribution

| Fingerprint | Bit/Smiles | Feature Structure                      | Score |
|-------------|------------|----------------------------------------|-------|
| FCFP_2      | -885550502 | <br><chem>[*]C(=[*])NC(=[*])[*]</chem> | 0.115 |

| FCFP_2                                 | -1143715940 | 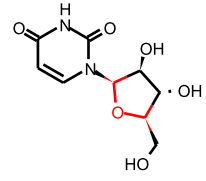<br><chem>["][C@@H]1["][*][C@H]([*])O1</chem> | 0.095  |
|----------------------------------------|-------------|----------------------------------------------------------------------------------------------------------------------------------|--------|
| FCFP_2                                 | 3           | <br><chem>["]O</chem>                         | 0.074  |
| Top Features for negative contribution |             |                                                                                                                                  |        |
| Fingerprint                            | Bit/Smiles  | Feature Structure                                                                                                                | Score  |
| FCFP_2                                 | 1872154524  | <br><chem>["]C(=O)["]</chem>                  | -0.105 |
| FCFP_2                                 | 1           | <br><chem>["]O["]</chem>                    | -0.080 |
| FCFP_2                                 | -1272709286 | <br><chem>["]C(["])CO</chem>                | -0.049 |





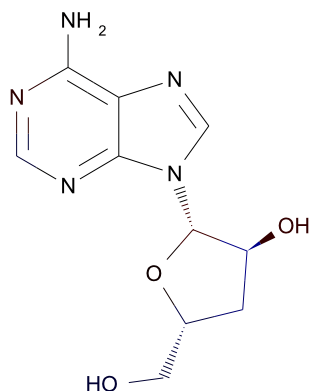
 $C_{10}H_{13}N_5O_3$ 

Molecular Weight: 251.24191

ALogP: -1.308

Rotatable Bonds: 2

Acceptors: 7

Donors: 3

## Model Prediction

Prediction: 0.155

Unit: g/kg\_body\_weight

Mahalanobis Distance: 11.019

Mahalanobis Distance p-value: 8.17e-007

Mahalanobis Distance: The Mahalanobis distance (MD) is a generalization of the Euclidean distance that accounts for correlations among the X properties. It is calculated as the distance to the center of the training data. The larger the MD, the less trustworthy the prediction.

Mahalanobis Distance p-value: The p-value gives the fraction of training data with an MD greater than or equal to the one for the given sample, assuming normally distributed data. The smaller the p-value, the less trustworthy the prediction. For highly non-normal X properties (e.g., fingerprints), the MD p-value is wildly inaccurate.

## Structural Similar Compounds

| Name                        | TRIAMTERENE    | MELAMINE       | 50%1,4,5,8-TETRAAMINOANTHRAQUIONONE + DERIVATIVES |
|-----------------------------|----------------|----------------|---------------------------------------------------|
| Structure                   |                |                |                                                   |
| Actual Endpoint (-log C)    | 4.00564        | 2.40182        | 3.0764                                            |
| Predicted Endpoint (-log C) | 3.1992         | 3.01288        | 3.08142                                           |
| Distance                    | 0.639          | 0.707          | 0.715                                             |
| Reference                   | NCI/NTP TR-420 | NCI/NTP TR-245 | NCI/NTP TR-299                                    |

## Model Applicability

Unknown features are fingerprint features in the query molecule, but not found in the training set.

1. All properties and OPS components are within expected ranges.
2. Unknown FCFP\_2 feature: -124685461: [\*]:n:c:n:[\*]
3. Unknown FCFP\_2 feature: -306856457: [\*]C([\*])n1:[c]([\*]):[\*]:[\*]:c:1
4. Unknown FCFP\_2 feature: 1315416442: [\*][C@H]1[\*][\*]O[C@H]1n(:[\*]):[\*]

## Feature Contribution

### Top features for positive contribution

| Fingerprint | Bit/Smiles  | Feature Structure                                 | Score |
|-------------|-------------|---------------------------------------------------|-------|
| FCFP_2      | -1143715940 | <br><chem>[*][C@H]1[*][*][C@H]1n(:[*]):[*]</chem> | 0.095 |

|                                        |             |                                                                                                            |        |
|----------------------------------------|-------------|------------------------------------------------------------------------------------------------------------|--------|
| FCFP_2                                 | 3           | 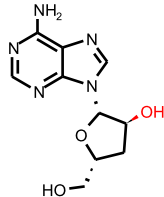<br>[*]O                | 0.074  |
| FCFP_2                                 | 17          | <br>[*]:n:[*]           | 0.044  |
| Top Features for negative contribution |             |                                                                                                            |        |
| Fingerprint                            | Bit/Smiles  | Feature Structure                                                                                          | Score  |
| FCFP_2                                 | -1272798659 | <br>[*][C@@H]1[*][*]CC1 | -0.111 |
| FCFP_2                                 | 1           | <br>[*]O[*]           | -0.080 |
| FCFP_2                                 | 16          | <br>[*]:[cH]:[*]      | -0.051 |



# Ribavirin

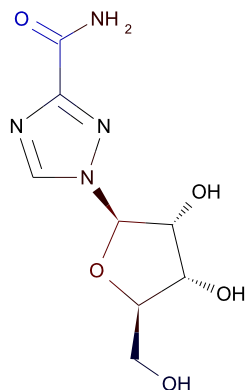

$C_8H_{12}N_4O_5$

Molecular Weight: 244.20467

ALogP: -2.745

Rotatable Bonds: 3

Acceptors: 7

Donors: 4

## Model Prediction

Prediction: 0.154

Unit: g/kg\_body\_weight

Mahalanobis Distance: 9.872

Mahalanobis Distance p-value: 7.13e-005

Mahalanobis Distance: The Mahalanobis distance (MD) is a generalization of the Euclidean distance that accounts for correlations among the X properties. It is calculated as the distance to the center of the training data. The larger the MD, the less trustworthy the prediction.

Mahalanobis Distance p-value: The p-value gives the fraction of training data with an MD greater than or equal to the one for the given sample, assuming normally distributed data. The smaller the p-value, the less trustworthy the prediction. For highly non-normal X properties (e.g., fingerprints), the MD p-value is wildly inaccurate.

# TOPKAT\_Rat\_Maximum\_Tolerated\_Dose\_Feed

## Structural Similar Compounds

| Name                        | L-ASORBIC ACID | METHYLDOPA SESQUIHYDRATE | HYDROCHLOROTHIAZIDE |
|-----------------------------|----------------|--------------------------|---------------------|
| Structure                   |                |                          |                     |
| Actual Endpoint (-log C)    | 1.89364        | 2.94452                  | 3.56001             |
| Predicted Endpoint (-log C) | 2.56611        | 2.32114                  | 3.55045             |
| Distance                    | 0.651          | 0.683                    | 0.740               |
| Reference                   | NCI/NTP TR-247 | NCI/NTP TR-348           | NCI/NTP TR-357      |

## Model Applicability

Unknown features are fingerprint features in the query molecule, but not found in the training set.

1. All properties and OPS components are within expected ranges.
2. Unknown FCFP\_2 feature: -2049666792: [\*]C[\*]n1:n:[\*]:[\*]:c:1
3. Unknown FCFP\_2 feature: -124685461: [\*]:n:c:n:[\*]
4. Unknown FCFP\_2 feature: 1315416442: [\*][C@H]1[\*][\*]O[C@H]1n(:[\*]):[\*]

## Feature Contribution

### Top features for positive contribution

| Fingerprint | Bit/Smiles  | Feature Structure                    | Score |
|-------------|-------------|--------------------------------------|-------|
| FCFP_2      | -1143715940 | <br>[*][C@H]1[*][*][C@H]1n(:[*]):[*] | 0.095 |

|                                        |            |                                                                                                       |        |
|----------------------------------------|------------|-------------------------------------------------------------------------------------------------------|--------|
| FCFP_2                                 | 3          | 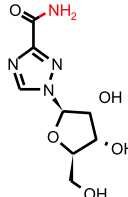<br>[*]O           | 0.074  |
| FCFP_2                                 | 17         | <br>[*]:n:[*]      | 0.044  |
| Top Features for negative contribution |            |                                                                                                       |        |
| Fingerprint                            | Bit/Smiles | Feature Structure                                                                                     | Score  |
| FCFP_2                                 | 1872154524 | <br>[*]C(=O)[*]    | -0.105 |
| FCFP_2                                 | 1          | <br>[*]O[*]      | -0.080 |
| FCFP_2                                 | 16         | <br>[*]:[cH]:[*] | -0.051 |



AND Enantiomer

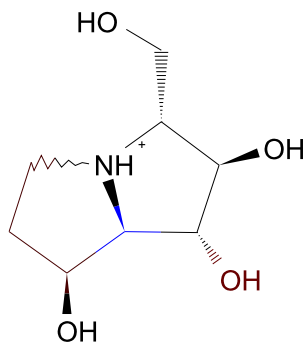 $C_8H_{16}NO_4$ 

Molecular Weight: 190.21693

ALogP: -3.556

Rotatable Bonds: 1

Acceptors: 4

Donors: 5

## Model Prediction

Prediction: 0.261

Unit: g/kg\_body\_weight

Mahalanobis Distance: 15.946

Mahalanobis Distance p-value: 2.66e-014

Mahalanobis Distance: The Mahalanobis distance (MD) is a generalization of the Euclidean distance that accounts for correlations among the X properties. It is calculated as the distance to the center of the training data. The larger the MD, the less trustworthy the prediction.

Mahalanobis Distance p-value: The p-value gives the fraction of training data with an MD greater than or equal to the one for the given sample, assuming normally distributed data. The smaller the p-value, the less trustworthy the prediction. For highly non-normal X properties (e.g., fingerprints), the MD p-value is wildly inaccurate.

## Structural Similar Compounds

| Name                        | HC RED 3       | 2,4-DIAMINOPHENOL DIHYDROCHLORIDE | AMPICILLIN TRIHYDRATE |
|-----------------------------|----------------|-----------------------------------|-----------------------|
| Structure                   |                |                                   |                       |
| Actual Endpoint (-log C)    | 2.59592        | 3.69598                           | 2.36724               |
| Predicted Endpoint (-log C) | 3.285          | 3.37438                           | 2.27651               |
| Distance                    | 1.095          | 1.138                             | 1.197                 |
| Reference                   | NCI/NTP TR-281 | NCI/NTP TR-401                    | NCI/NTP TR-318        |

## Model Applicability

Unknown features are fingerprint features in the query molecule, but not found in the training set.

1. ALogP out of range. Value: -3.556. Training min, max, mean, SD: -2.297, 8.698, 1.9556, 1.637.
2. Num\_H\_Donors out of range. Value: 5. Training min, max, mean, SD: 0, 3, 0.4375, 0.8311.
3. OPS PC9 out of range. Value: -2.7771. Training min, max, SD, explained variance: -2.7086, 2.9267, 1.019, 0.0321.
4. Unknown FCFP\_2 feature: 10: [\*][NH+]([\*])[\*]
5. Unknown FCFP\_2 feature: -1853714334: [\*][C@@H]1[\*][\*][C@H]2[\*][\*][C][NH+]12
6. Unknown FCFP\_2 feature: -1817836174: [\*][C@H]1[\*][\*][NH+]2[\*][\*][C@H]([\*])C12
7. Unknown FCFP\_2 feature: 1155241219: [\*][NH+]1[\*][\*]CC1

## Feature Contribution

### Top features for positive contribution

| Fingerprint | Bit/Smiles | Feature Structure | Score |
|-------------|------------|-------------------|-------|
|             |            |                   |       |



|                                        |             |                                                                                                                                                                                       |        |
|----------------------------------------|-------------|---------------------------------------------------------------------------------------------------------------------------------------------------------------------------------------|--------|
| FCFP_2                                 | 3           | 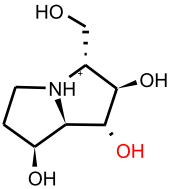 <p>Chemical structure showing a bicyclic molecule with a red OH group.</p> <p>[*]O</p>            | 0.104  |
| FCFP_2                                 | -1272798659 |  <p>Chemical structure showing a bicyclic molecule with a red ring.</p> <p>[*][C@@H]1[*][*]CC1</p> | 0.070  |
| Top Features for negative contribution |             |                                                                                                                                                                                       |        |
| Fingerprint                            | Bit/Smiles  | Feature Structure                                                                                                                                                                     | Score  |
| FCFP_2                                 | 0           |  <p>Chemical structure showing a bicyclic molecule with a blue bond.</p> <p>[*]C([*])[*]</p>       | -0.290 |

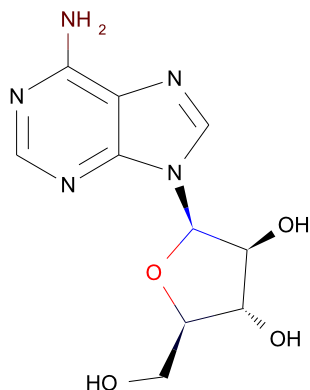

Molecular Weight: 267.24132

Rotatable Bonds: 2

Donors: 4

Prediction: 0.001

Mahalanobis Distance: 13.179

Mahalanobis Distance p-value: 1.86e-010

**Mahalanobis Distance:** The Mahalanobis distance (MD) is a generalization of the Euclidean distance that accounts for correlations among the X properties. It is calculated as the distance to the center of the training data. The larger the MD, the less trustworthy the prediction.

Mahalanobis Distance p-value: The p-value gives the fraction of training data with an MD greater than or equal to the one for the given sample, assuming normally distributed data. The smaller the p-value, the less trustworthy the prediction. For highly non-normal X properties (e.g., fingerprints), the MD p-value is wildly inaccurate.

## Structural Similar Compounds

| Name                        | AMPICILLIN TRIHYDRATE                                                               | HC RED 3                                                                            | SULFISOOXAZOLE                                                                      |
|-----------------------------|-------------------------------------------------------------------------------------|-------------------------------------------------------------------------------------|-------------------------------------------------------------------------------------|
| Structure                   | 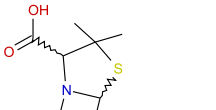 |  |  |
| Actual Endpoint (-log C)    | 2.36724                                                                             | 2.59592                                                                             | 2.82494                                                                             |
| Predicted Endpoint (-log C) | 2.27651                                                                             | 3.285                                                                               | 3.0705                                                                              |
| Distance                    | 0.831                                                                               | 0.961                                                                               | 1.101                                                                               |
| Reference                   | NCI/NTP TR-318                                                                      | NCI/NTP TR-281                                                                      | NCI/NTP TR-138                                                                      |

## Model Applicability

Unknown features are fingerprint features in the query molecule, but not found in the training set.

1. Num\_H\_Donors out of range. Value: 4. Training min, max, mean, SD: 0, 3, 0.4375, 0.8311.
2. Num\_H\_Acceptors out of range. Value: 8. Training min, max, mean, SD: 0, 6, 1.6146, 1.644.
3. Molecular\_PolarSASA out of range. Value: 238.62. Training min, max, mean, SD: 0, 223.97, 50.816, 55.15.
4. Molecular\_PolarSurfaceArea out of range. Value: 139.54. Training min, max, mean, SD: 0, 138.03, 28.978, 32.1.
5. Unknown FCFP\_2 feature: -124685461: [\*]:n:c:n:[\*]
6. Unknown FCFP\_2 feature: -1564473960: [\*]n1:[\*]:[\*]:[c]:([\*]):[c]:1:n:[\*]
7. Unknown FCFP\_2 feature: -306856457: [\*]C([\*])n1:[c]:([\*]):[\*]:[\*]:c:1
8. Unknown FCFP\_2 feature: 1315416442: [\*][C@H]1[\*]\*[O][C@H]1n([\*]):[\*]

## Feature Contribution

| Top features for positive contribution |            |                   |       |
|----------------------------------------|------------|-------------------|-------|
| Fingerprint                            | Bit/Smiles | Feature Structure | Score |
|                                        |            |                   |       |

|                                        |             |                                                                                                                                    |        |
|----------------------------------------|-------------|------------------------------------------------------------------------------------------------------------------------------------|--------|
| FCFP_2                                 | 1           | 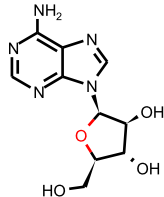<br><chem>[*]O[*]</chem>                        | 0.511  |
| FCFP_2                                 | 3           | <br><chem>[*]O</chem>                           | 0.104  |
| Top Features for negative contribution |             |                                                                                                                                    |        |
| Fingerprint                            | Bit/Smiles  | Feature Structure                                                                                                                  | Score  |
| FCFP_2                                 | 0           | <br><chem>[*]C([*])[*]</chem>                   | -0.290 |
| FCFP_2                                 | -1143715940 | <br><chem>[*][C@@H]1[*][*][C@H]([*])O1</chem> | -0.053 |

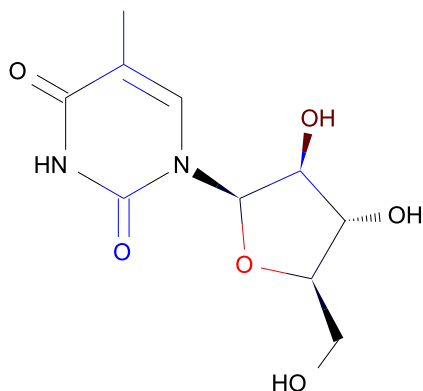
 $C_{10}H_{14}N_2O_6$ 

Molecular Weight: 258.22795

ALogP: -2.005

Rotatable Bonds: 2

Acceptors: 6

Donors: 4

## Model Prediction

Prediction: 0.060

Unit: g/kg\_body\_weight

Mahalanobis Distance: 12.293

Mahalanobis Distance p-value: 3.39e-009

Mahalanobis Distance: The Mahalanobis distance (MD) is a generalization of the Euclidean distance that accounts for correlations among the X properties. It is calculated as the distance to the center of the training data. The larger the MD, the less trustworthy the prediction.

Mahalanobis Distance p-value: The p-value gives the fraction of training data with an MD greater than or equal to the one for the given sample, assuming normally distributed data. The smaller the p-value, the less trustworthy the prediction. For highly non-normal X properties (e.g., fingerprints), the MD p-value is wildly inaccurate.

## Structural Similar Compounds

| Name                        | AMPICILLIN TRIHYDRATE | HC RED 3       | PENICILLIN VK  |
|-----------------------------|-----------------------|----------------|----------------|
| Structure                   |                       |                |                |
| Actual Endpoint (-log C)    | 2.36724               | 2.59592        | 2.54455        |
| Predicted Endpoint (-log C) | 2.27651               | 3.285          | 3.9702         |
| Distance                    | 0.681                 | 0.847          | 0.930          |
| Reference                   | NCI/NTP TR-318        | NCI/NTP TR-281 | NCI/NTP TR-336 |

## Model Applicability

Unknown features are fingerprint features in the query molecule, but not found in the training set.

1. Num\_H\_Donors out of range. Value: 4. Training min, max, mean, SD: 0, 3, 0.4375, 0.8311.

## Feature Contribution

### Top features for positive contribution

| Fingerprint | Bit/Smiles | Feature Structure | Score |
|-------------|------------|-------------------|-------|
| FCFP_2      | 1          | <br>[*]O[*]       | 0.511 |

|                                        |            |                                                                                                      |        |
|----------------------------------------|------------|------------------------------------------------------------------------------------------------------|--------|
| FCFP_2                                 | 3          | 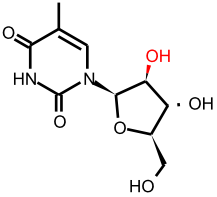<br>[*]O          | 0.104  |
| Top Features for negative contribution |            |                                                                                                      |        |
| Fingerprint                            | Bit/Smiles | Feature Structure                                                                                    | Score  |
| FCFP_2                                 | 136597326  | <br>[*]C(=[*])C   | -0.489 |
| FCFP_2                                 | 1872154524 | <br>[*]C(=O)[*]   | -0.307 |
| FCFP_2                                 | 0          | <br>[*]C([*])[*] | -0.290 |

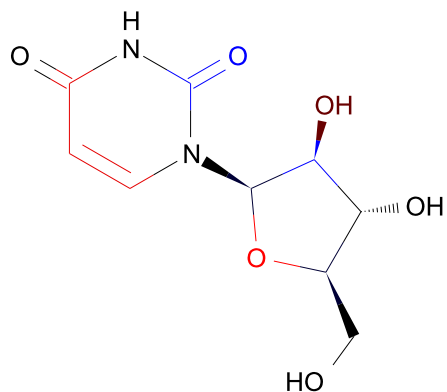
 $C_9H_{12}N_2O_6$ 

Molecular Weight: 244.20137

ALogP: -2.451

Rotatable Bonds: 2

Acceptors: 6

Donors: 4

### Model Prediction

Prediction: 0.014

Unit: g/kg\_body\_weight

Mahalanobis Distance: 12.800

Mahalanobis Distance p-value: 6.44e-010

Mahalanobis Distance: The Mahalanobis distance (MD) is a generalization of the Euclidean distance that accounts for correlations among the X properties. It is calculated as the distance to the center of the training data. The larger the MD, the less trustworthy the prediction.

Mahalanobis Distance p-value: The p-value gives the fraction of training data with an MD greater than or equal to the one for the given sample, assuming normally distributed data. The smaller the p-value, the less trustworthy the prediction. For highly non-normal X properties (e.g., fingerprints), the MD p-value is wildly inaccurate.

### Structural Similar Compounds

| Name                        | AMPICILLIN TRIHYDRATE | HC RED 3       | PENICILLIN VK  |
|-----------------------------|-----------------------|----------------|----------------|
| Structure                   |                       |                |                |
| Actual Endpoint (-log C)    | 2.36724               | 2.59592        | 2.54455        |
| Predicted Endpoint (-log C) | 2.27651               | 3.285          | 3.9702         |
| Distance                    | 0.713                 | 0.861          | 0.983          |
| Reference                   | NCI/NTP TR-318        | NCI/NTP TR-281 | NCI/NTP TR-336 |

### Model Applicability

Unknown features are fingerprint features in the query molecule, but not found in the training set.

1. ALogP out of range. Value: -2.451. Training min, max, mean, SD: -2.297, 8.698, 1.9556, 1.637.
2. Num\_H\_Donors out of range. Value: 4. Training min, max, mean, SD: 0, 3, 0.4375, 0.8311.

### Feature Contribution

#### Top features for positive contribution

| Fingerprint | Bit/Smiles | Feature Structure | Score |
|-------------|------------|-------------------|-------|
| FCFP_2      | 1          | <br>[*]O[*]       | 0.511 |

|                                        |             |                                                                                                                                     |        |
|----------------------------------------|-------------|-------------------------------------------------------------------------------------------------------------------------------------|--------|
| FCFP_2                                 | 451847724   | 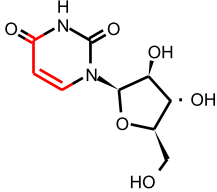<br><chem>[*]C=C/C(=[*])[*]</chem>               | 0.225  |
| FCFP_2                                 | 3           | <br><chem>[*]O</chem>                            | 0.104  |
| Top Features for negative contribution |             |                                                                                                                                     |        |
| Fingerprint                            | Bit/Smiles  | Feature Structure                                                                                                                   | Score  |
| FCFP_2                                 | 1872154524  | <br><chem>[*]C(=O)[*]</chem>                     | -0.307 |
| FCFP_2                                 | 0           | <br><chem>[*]C([*])[*]</chem>                  | -0.290 |
| FCFP_2                                 | -1143715940 | <br><chem>[*][C@@H]1[*][*][C@H]1([*])O1</chem> | -0.053 |





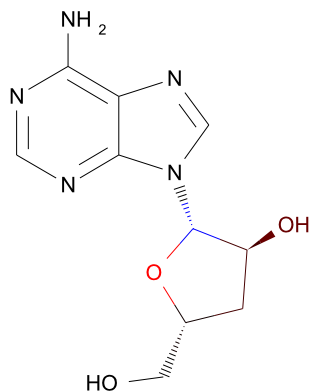
 $C_{10}H_{13}N_5O_3$ 

Molecular Weight: 251.24191

ALogP: -1.308

Rotatable Bonds: 2

Acceptors: 7

Donors: 3

### Model Prediction

Prediction: 0.002

Unit: g/kg\_body\_weight

Mahalanobis Distance: 11.838

Mahalanobis Distance p-value: 1.51e-008

Mahalanobis Distance: The Mahalanobis distance (MD) is a generalization of the Euclidean distance that accounts for correlations among the X properties. It is calculated as the distance to the center of the training data. The larger the MD, the less trustworthy the prediction.

Mahalanobis Distance p-value: The p-value gives the fraction of training data with an MD greater than or equal to the one for the given sample, assuming normally distributed data. The smaller the p-value, the less trustworthy the prediction. For highly non-normal X properties (e.g., fingerprints), the MD p-value is wildly inaccurate.

### Structural Similar Compounds

| Name                        | AMPICILLIN TRIHYDRATE | HC RED 3       | SULFISOOXAZOLE |
|-----------------------------|-----------------------|----------------|----------------|
| Structure                   |                       |                |                |
| Actual Endpoint (-log C)    | 2.36724               | 2.59592        | 2.82494        |
| Predicted Endpoint (-log C) | 2.27651               | 3.285          | 3.0705         |
| Distance                    | 0.782                 | 0.782          | 0.849          |
| Reference                   | NCI/NTP TR-318        | NCI/NTP TR-281 | NCI/NTP TR-138 |

### Model Applicability

Unknown features are fingerprint features in the query molecule, but not found in the training set.

1. Num\_H\_Acceptors out of range. Value: 7. Training min, max, mean, SD: 0, 6, 1.6146, 1.644.
2. Unknown FCFP\_2 feature: -124685461: [\*]:n:c:n:[\*]
3. Unknown FCFP\_2 feature: -1564473960: [\*]n1:[\*]:[\*]:[c]:[\*]:[c]:1:n:[\*]
4. Unknown FCFP\_2 feature: -306856457: [\*]C([\*])n1:[c]:[\*]:[\*]:[\*]:c:1
5. Unknown FCFP\_2 feature: 1315416442: [\*][C@H]1[\*][\*]O[C@H]1n(:[\*]):[\*]

### Feature Contribution

#### Top features for positive contribution

| Fingerprint | Bit/Smiles | Feature Structure | Score |
|-------------|------------|-------------------|-------|
| FCFP_2      | 1          | <br>[*]O[*]       | 0.511 |

|                                        |             |                                                                                                                                    |        |
|----------------------------------------|-------------|------------------------------------------------------------------------------------------------------------------------------------|--------|
| FCFP_2                                 | 3           | 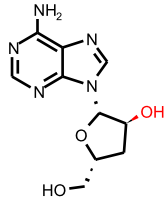<br><chem>[*]O</chem>                           | 0.104  |
| FCFP_2                                 | -1272798659 | <br><chem>[*][C@@H]1[*][*]CC1</chem>            | 0.070  |
| Top Features for negative contribution |             |                                                                                                                                    |        |
| Fingerprint                            | Bit/Smiles  | Feature Structure                                                                                                                  | Score  |
| FCFP_2                                 | 0           | <br><chem>[*]C([*])[*]</chem>                   | -0.290 |
| FCFP_2                                 | -1143715940 | <br><chem>[*][C@@H]1[*][*][C@H]([*])O1</chem> | -0.053 |

# Ribavirin

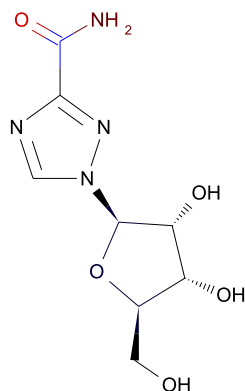
$$\text{C}_8\text{H}_{12}\text{N}_4\text{O}_5$$

Molecular Weight: 244.20467

ALogP: -2.745

Rotatable Bonds: 3

Acceptors: 7

Donors: 4

## Model Prediction

Prediction: 0.024

Unit: g/kg\_body\_weight

Mahalanobis Distance: 12.098

Mahalanobis Distance p-value: 6.42e-009

**Mahalanobis Distance:** The Mahalanobis distance (MD) is a generalization of the Euclidean distance that accounts for correlations among the X properties. It is calculated as the distance to the center of the training data. The larger the MD, the less trustworthy the prediction.

Mahalanobis Distance p-value: The p-value gives the fraction of training data with an MD greater than or equal to the one for the given sample, assuming normally distributed data. The smaller the p-value, the less trustworthy the prediction. For highly non-normal X properties (e.g., fingerprints), the MD p-value is wildly inaccurate.

## TOPKAT\_Rat\_Maximum\_Tolerated\_Dose\_Gavage

## Structural Similar Compounds

| Name                        | AMPICILLIN TRIHYDRATE                                                               | HC RED 3                                                                            | PENICILLIN VK                                                                       |
|-----------------------------|-------------------------------------------------------------------------------------|-------------------------------------------------------------------------------------|-------------------------------------------------------------------------------------|
| Structure                   | 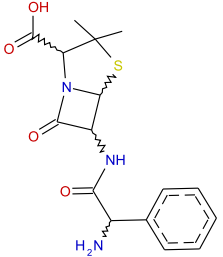 |  |  |
| Actual Endpoint (-log C)    | 2.36724                                                                             | 2.59592                                                                             | 2.54455                                                                             |
| Predicted Endpoint (-log C) | 2.27651                                                                             | 3.285                                                                               | 3.9702                                                                              |
| Distance                    | 0.702                                                                               | 0.898                                                                               | 1.075                                                                               |
| Reference                   | NCI/NTP TR-318                                                                      | NCI/NTP TR-281                                                                      | NCI/NTP TR-336                                                                      |

## Model Applicability

Unknown features are fingerprint features in the query molecule, but not found in the training set.

1. ALogP out of range. Value: -2.745. Training min, max, mean, SD: -2.297, 8.698, 1.9556, 1.637.
2. Num\_H\_Donors out of range. Value: 4. Training min, max, mean, SD: 0, 3, 0.4375, 0.8311.
3. Num\_H\_Acceptors out of range. Value: 7. Training min, max, mean, SD: 0, 6, 1.6146, 1.644.
4. Molecular\_PolarSASA out of range. Value: 251.23. Training min, max, mean, SD: 0, 223.97, 50.816, 55.15.
5. Molecular\_PolarSurfaceArea out of range. Value: 143.72. Training min, max, mean, SD: 0, 138.03, 28.978, 32.1.
6. Unknown FCFP\_2 feature: -2049666792: [\*]C([\*])n1:n:[\*]:[\*]:c:1
7. Unknown FCFP\_2 feature: -1539162406: [\*]C(=[\*])[c]1:n:[\*]:[\*]:n:1
8. Unknown FCFP\_2 feature: -124685461: [\*]:n:c:n:[\*]
9. Unknown FCFP\_2 feature: 1315416442: [\*][C@H]1[\*][\*]O[C@H]1n(:[\*]):[\*]

## Feature Contribution

| Top features for positive contribution |            |                   |       |
|----------------------------------------|------------|-------------------|-------|
| Fingerprint                            | Bit/Smiles | Feature Structure | Score |
|                                        |            |                   |       |

|                                        |             |                                                                                                                                 |        |
|----------------------------------------|-------------|---------------------------------------------------------------------------------------------------------------------------------|--------|
| FCFP_2                                 | 1           | 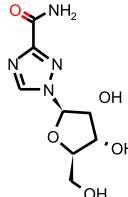<br><chem>[*]O[*]</chem>                     | 0.511  |
| FCFP_2                                 | 3           | <br><chem>[*]O</chem>                        | 0.104  |
| Top Features for negative contribution |             |                                                                                                                                 |        |
| Fingerprint                            | Bit/Smiles  | Feature Structure                                                                                                               | Score  |
| FCFP_2                                 | 1872154524  | <br><chem>[*]C(=O)[*]</chem>                 | -0.307 |
| FCFP_2                                 | 0           | <br><chem>[*]C([*])[*]</chem>              | -0.290 |
| FCFP_2                                 | -1143715940 | <br><chem>[*]C@@H1[*][*]C@H1([*])O1</chem> | -0.053 |



AND Enantiomer

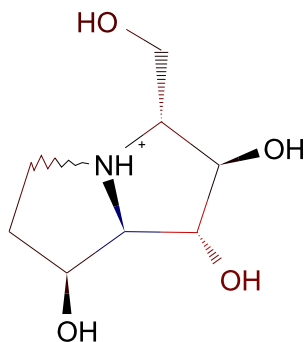 $C_8H_{16}NO_4$ 

Molecular Weight: 190.21693

ALogP: -3.556

Rotatable Bonds: 1

Acceptors: 4

Donors: 5

## Model Prediction

Prediction: 0.778

Unit: g/kg\_body\_weight

Mahalanobis Distance: 22.451

Mahalanobis Distance p-value: 3.06e-018

Mahalanobis Distance: The Mahalanobis distance (MD) is a generalization of the Euclidean distance that accounts for correlations among the X properties. It is calculated as the distance to the center of the training data. The larger the MD, the less trustworthy the prediction.

Mahalanobis Distance p-value: The p-value gives the fraction of training data with an MD greater than or equal to the one for the given sample, assuming normally distributed data. The smaller the p-value, the less trustworthy the prediction. For highly non-normal X properties (e.g., fingerprints), the MD p-value is wildly inaccurate.

## Structural Similar Compounds

| Name                        | GLUCOSE        | 2-AMINO-2-(HYDROXYMETHYL)-1,3-PROPANEDIOL | L-ASCORBIC ACID  |
|-----------------------------|----------------|-------------------------------------------|------------------|
| Structure                   |                |                                           |                  |
| Actual Endpoint (-log C)    | 0.844          | 1.312                                     | 1.17             |
| Predicted Endpoint (-log C) | 1.68269        | 2.10886                                   | 2.00353          |
| Distance                    | 0.652          | 0.663                                     | 0.738            |
| Reference                   | 85AIAL -;39;73 | BCFAAI 110;653;71                         | OYYAA2 19;323;80 |

## Model Applicability

Unknown features are fingerprint features in the query molecule, but not found in the training set.

1. All properties and OPS components are within expected ranges.
2. Unknown ECFP\_2 feature: 1976330679: [\*][NH+]([\*])([\*])
3. Unknown ECFP\_2 feature: -1693770146: [\*][C@ @H]1[\*][\*][C@H]2[\*][\*][C[NH+]12
4. Unknown ECFP\_2 feature: -1395316370: [\*][C@H]1[\*][\*][NH+]2[\*][\*][C@H]([\*])C12
5. Unknown ECFP\_2 feature: -705668329: [\*][C[C@ @H]1[C@ @H]([\*])([\*])([\*][NH+]1[\*])
6. Unknown ECFP\_2 feature: -244159614: [\*][NH+]1[\*][\*]CC1
7. Unknown FCFP\_6 feature: 10: [\*][NH+]([\*])([\*])
8. Unknown FCFP\_6 feature: -1853714334: [\*][C@ @H]1[\*][\*][C@H]2[\*][\*][C[NH+]12
9. Unknown FCFP\_6 feature: -1817836174: [\*][C@H]1[\*][\*][NH+]2[\*][\*][C@H]([\*])C12
10. Unknown FCFP\_6 feature: 1155241219: [\*][NH+]1[\*][\*]CC1

## Feature Contribution

### Top features for positive contribution

| Fingerprint | Bit/Smiles | Feature Structure | Score |
|-------------|------------|-------------------|-------|
|             |            |                   |       |

| FCFP_6                                 | -1272709286 | 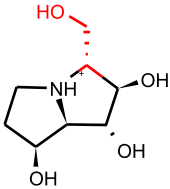<br><chem>[*]C([*])CO</chem>         | 0.115  |
|----------------------------------------|-------------|-------------------------------------------------------------------------------------------------------------------------|--------|
| FCFP_6                                 | 1070061035  | <br><chem>[*]C([*])O</chem>          | 0.100  |
| ECFP_6                                 | -1331450522 | <br><chem>[*][C@@H]1[*][*]CC1</chem> | 0.086  |
| Top Features for negative contribution |             |                                                                                                                         |        |
| Fingerprint                            | Bit/Smiles  | Feature Structure                                                                                                       | Score  |
| FCFP_6                                 | 3           | <br><chem>[*]O</chem>              | -0.107 |
| FCFP_6                                 | 0           | <br><chem>[*]C([*])[*]</chem>      | -0.079 |

ECFP\_6

-167460056

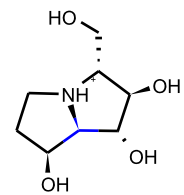

[\*]C([\*])[\*]

-0.057



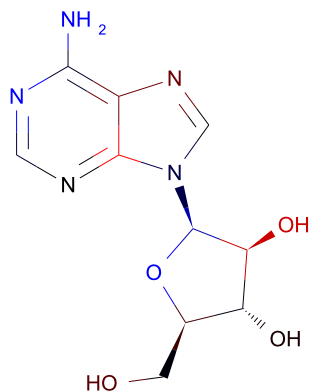
 $C_{10}H_{13}N_5O_4$ 

Molecular Weight: 267.24132

ALogP: -1.881

Rotatable Bonds: 2

Acceptors: 8

Donors: 4

## Model Prediction

Prediction: 1.119

Unit: g/kg\_body\_weight

Mahalanobis Distance: 17.894

Mahalanobis Distance p-value: 0.00118

Mahalanobis Distance: The Mahalanobis distance (MD) is a generalization of the Euclidean distance that accounts for correlations among the X properties. It is calculated as the distance to the center of the training data. The larger the MD, the less trustworthy the prediction.

Mahalanobis Distance p-value: The p-value gives the fraction of training data with an MD greater than or equal to the one for the given sample, assuming normally distributed data. The smaller the p-value, the less trustworthy the prediction. For highly non-normal X properties (e.g., fingerprints), the MD p-value is wildly inaccurate.

## Structural Similar Compounds

| Name                        | 6-MERCAPTOPURINE RIBOSIDE | TUBERCIDIN       | 7H-PYRROLO[2;3-d]PYRIMIDIN-4-OL; 7-.beta.-d-RIBOFURANOSYL- |
|-----------------------------|---------------------------|------------------|------------------------------------------------------------|
| Structure                   |                           |                  |                                                            |
| Actual Endpoint (-log C)    | 2.5                       | 4.221            | 4.012                                                      |
| Predicted Endpoint (-log C) | 2.54632                   | 2.53511          | 3.00148                                                    |
| Distance                    | 0.286                     | 0.316            | 0.422                                                      |
| Reference                   | NIIRDN 6;853;82           | CNREA8 29;116;69 | CNREA8 29;116;69                                           |

## Model Applicability

Unknown features are fingerprint features in the query molecule, but not found in the training set.

1. All properties and OPS components are within expected ranges.
2. Unknown FCFP\_6 feature: 16: [\*]:[cH]:[\*]
3. Unknown FCFP\_6 feature: 1747237384: [\*][c](:[\*]):n:[cH]:[\*]
4. Unknown FCFP\_6 feature: -124685461: [\*]:n:[cH]:n:[\*]
5. Unknown FCFP\_6 feature: -1564473960: [\*]n1:[\*]:[\*]:[c](:[\*]):[c]:1:n:[\*]
6. Unknown FCFP\_6 feature: -1151884458: [\*]:n:[c](N):[c](:[\*]):[\*]
7. Unknown FCFP\_6 feature: 1069584379: [\*]:[c](:[\*])N
8. Unknown FCFP\_6 feature: -306856457: [\*]C([\*])n1:[cH]:[\*]:[\*]:[c]:1:[\*]
9. Unknown FCFP\_6 feature: 1315416442: [\*][C@H]1[\*][\*]O[C@H]1n(:[\*]):[\*]

## Feature Contribution

### Top features for positive contribution

| Fingerprint | Bit/Smiles | Feature Structure | Score |
|-------------|------------|-------------------|-------|
|             |            |                   |       |

|                                        |             |                                                                                                                              |        |
|----------------------------------------|-------------|------------------------------------------------------------------------------------------------------------------------------|--------|
| ECFP_6                                 | 642810091   | 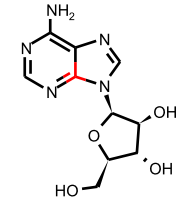<br>[*]:[c](:[*]):[*]                     | 0.281  |
| FCFP_6                                 | -1272709286 | <br>[*]C([*])CO                           | 0.115  |
| FCFP_6                                 | 178336375   | <br>[*][c](:[*]):[c]1:n:[*]:[*]:[c]:1:[*] | 0.109  |
| Top Features for negative contribution |             |                                                                                                                              |        |
| Fingerprint                            | Bit/Smiles  | Feature Structure                                                                                                            | Score  |
| ECFP_6                                 | 683445015   | <br>[*]O[*]                              | -0.266 |
| ECFP_6                                 | 655739385   | <br>[*]:n:[*]                           | -0.239 |

|        |   |                                                                                                                                                                                                                                                                                                                                                                                                                                                                                                                 |        |
|--------|---|-----------------------------------------------------------------------------------------------------------------------------------------------------------------------------------------------------------------------------------------------------------------------------------------------------------------------------------------------------------------------------------------------------------------------------------------------------------------------------------------------------------------|--------|
| FCFP_6 | 3 | 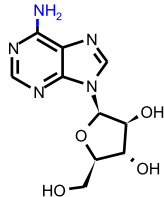 <p>Chemical structure of a purine derivative, specifically 2-amino-9-((2R,3R,4R)-4-hydroxy-3-hydroxymethyl-2-methyltetrahydrofuran-2-yl)-9H-purin-6(1H)-one. The structure shows a purine ring system with an amino group (NH<sub>2</sub>) at position 2 and a tetrahydrofuran ring attached at position 9. The tetrahydrofuran ring has hydroxyl groups at positions 2 and 3, and a hydroxymethyl group at position 4.</p> | -0.107 |
|--------|---|-----------------------------------------------------------------------------------------------------------------------------------------------------------------------------------------------------------------------------------------------------------------------------------------------------------------------------------------------------------------------------------------------------------------------------------------------------------------------------------------------------------------|--------|

[\*]O

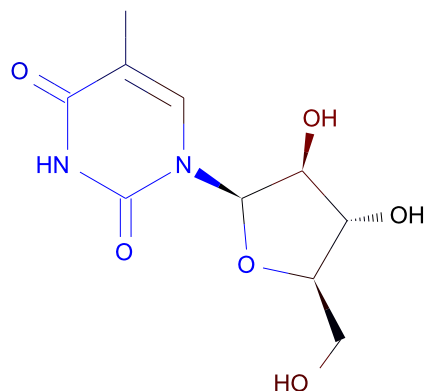

$C_{10}H_{14}N_2O_6$

Molecular Weight: 258.22795

ALogP: -2.005

Rotatable Bonds: 2

Acceptors: 6

Donors: 4

## Model Prediction

Prediction: 6.173

Unit: g/kg\_body\_weight

Mahalanobis Distance: 22.213

Mahalanobis Distance p-value: 3.41e-017

Mahalanobis Distance: The Mahalanobis distance (MD) is a generalization of the Euclidean distance that accounts for correlations among the X properties. It is calculated as the distance to the center of the training data. The larger the MD, the less trustworthy the prediction.

Mahalanobis Distance p-value: The p-value gives the fraction of training data with an MD greater than or equal to the one for the given sample, assuming normally distributed data. The smaller the p-value, the less trustworthy the prediction. For highly non-normal X properties (e.g., fingerprints), the MD p-value is wildly inaccurate.

## Structural Similar Compounds

| Name                        | 2'-DEOXY-5-FLUOROURIDINE  | 5-BROMODEOXYURIDINE | L-ASCORBIC ACID  |
|-----------------------------|---------------------------|---------------------|------------------|
| Structure                   |                           |                     |                  |
| Actual Endpoint (-log C)    | 3.059                     | 1.563               | 1.17             |
| Predicted Endpoint (-log C) | 2.42812                   | 2.06634             | 2.00353          |
| Distance                    | 0.495                     | 0.520               | 0.535            |
| Reference                   | NCILB* NCI-E-C-72-3252;73 | IYKEDH 4;467;73     | OYYAA2 19;323;80 |

## Model Applicability

Unknown features are fingerprint features in the query molecule, but not found in the training set.

1. All properties and OPS components are within expected ranges.

## Feature Contribution

### Top features for positive contribution

| Fingerprint | Bit/Smiles | Feature Structure                  | Score |
|-------------|------------|------------------------------------|-------|
| ECFP_6      | 642810091  | <br><chem>[*]:[c](:[*]):[*]</chem> | 0.281 |

|        |             |                                                                                                                 |       |
|--------|-------------|-----------------------------------------------------------------------------------------------------------------|-------|
| ECFP_6 | -1074141656 | 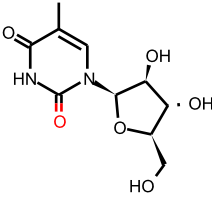<br><chem>[*]=O</chem>       | 0.142 |
| FCFP_6 | -1272709286 | <br><chem>[*]C([*])CO</chem> | 0.115 |

### Top Features for negative contribution

| Fingerprint | Bit/Smiles | Feature Structure                                                                                                         | Score  |
|-------------|------------|---------------------------------------------------------------------------------------------------------------------------|--------|
| ECFP_6      | 2106656448 | 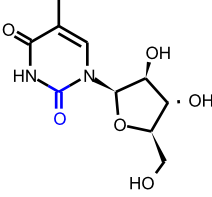<br><chem>[*]C(=O)[*]</chem>           | -0.352 |
| ECFP_6      | 683445015  | <br><chem>[*]O[*]</chem>             | -0.266 |
| FCFP_6      | 566058135  | <br><chem>[*]NC(=O)C(=[*])[*]</chem> | -0.216 |



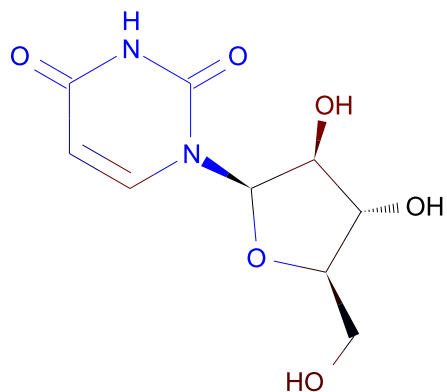

$C_9H_{12}N_2O_6$

Molecular Weight: 244.20137

ALogP: -2.451

Rotatable Bonds: 2

Acceptors: 6

Donors: 4

## Model Prediction

Prediction: 4.343

Unit: g/kg\_body\_weight

Mahalanobis Distance: 21.674

Mahalanobis Distance p-value: 6.08e-015

Mahalanobis Distance: The Mahalanobis distance (MD) is a generalization of the Euclidean distance that accounts for correlations among the X properties. It is calculated as the distance to the center of the training data. The larger the MD, the less trustworthy the prediction.

Mahalanobis Distance p-value: The p-value gives the fraction of training data with an MD greater than or equal to the one for the given sample, assuming normally distributed data. The smaller the p-value, the less trustworthy the prediction. For highly non-normal X properties (e.g., fingerprints), the MD p-value is wildly inaccurate.

## Structural Similar Compounds

| Name                        | 2'-DEOXY-5-FLUOROURIDINE  | L-ASCORBIC ACID  | 5-BROMODEOXYURIDINE |
|-----------------------------|---------------------------|------------------|---------------------|
| Structure                   |                           |                  |                     |
| Actual Endpoint (-log C)    | 3.059                     | 1.17             | 1.563               |
| Predicted Endpoint (-log C) | 2.42812                   | 2.00353          | 2.06634             |
| Distance                    | 0.509                     | 0.526            | 0.551               |
| Reference                   | NCILB* NCI-E-C-72-3252;73 | OYYAA2 19;323;80 | IYKEDH 4;467;73     |

## Model Applicability

Unknown features are fingerprint features in the query molecule, but not found in the training set.

1. OPS PC52 out of range. Value: -4.4898. Training min, max, SD, explained variance: -4.4185, 5.4839, 1.093, 0.0043.

## Feature Contribution

| Top features for positive contribution |            |                                    |       |
|----------------------------------------|------------|------------------------------------|-------|
| Fingerprint                            | Bit/Smiles | Feature Structure                  | Score |
| ECFP_6                                 | 642810091  | <br><chem>[*]:[c](:[*]):[*]</chem> | 0.281 |

| ECFP_6                                 | -1074141656 | 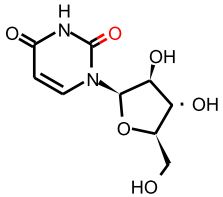<br>[*]=O                 | 0.142  |
|----------------------------------------|-------------|--------------------------------------------------------------------------------------------------------------|--------|
| FCFP_6                                 | -1272709286 | <br>[*]C[*]CO             | 0.115  |
| Top Features for negative contribution |             |                                                                                                              |        |
| Fingerprint                            | Bit/Smiles  | Feature Structure                                                                                            | Score  |
| ECFP_6                                 | 2106656448  | <br>[*]C(=O)[*]           | -0.352 |
| ECFP_6                                 | 683445015   | <br>[*]O[*]             | -0.266 |
| FCFP_6                                 | 566058135   | <br>[*]NC(=O)C(=[*])[*] | -0.216 |





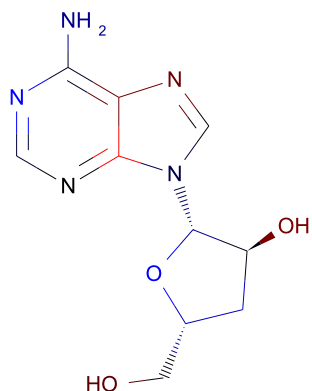
 $C_{10}H_{13}N_5O_3$ 

Molecular Weight: 251.24191

ALogP: -1.308

Rotatable Bonds: 2

Acceptors: 7

Donors: 3

## Model Prediction

Prediction: 1.213

Unit: g/kg\_body\_weight

Mahalanobis Distance: 20.095

Mahalanobis Distance p-value: 3.16e-009

Mahalanobis Distance: The Mahalanobis distance (MD) is a generalization of the Euclidean distance that accounts for correlations among the X properties. It is calculated as the distance to the center of the training data. The larger the MD, the less trustworthy the prediction.

Mahalanobis Distance p-value: The p-value gives the fraction of training data with an MD greater than or equal to the one for the given sample, assuming normally distributed data. The smaller the p-value, the less trustworthy the prediction. For highly non-normal X properties (e.g., fingerprints), the MD p-value is wildly inaccurate.

## Structural Similar Compounds

| Name                        | TUBERCIDIN       | 7H-PYRROLO[2;3-d]PYRIMIDIN-4-OL; 7-<br>.beta.-d-RIBOFURANOSYL- | 6-MERCAPTOPURINE<br>RIBOSIDE |
|-----------------------------|------------------|----------------------------------------------------------------|------------------------------|
| Structure                   |                  |                                                                |                              |
| Actual Endpoint (-log C)    | 4.221            | 4.012                                                          | 2.5                          |
| Predicted Endpoint (-log C) | 2.53511          | 3.00148                                                        | 2.54632                      |
| Distance                    | 0.434            | 0.467                                                          | 0.541                        |
| Reference                   | CNREA8 29;116;69 | CNREA8 29;116;69                                               | NIIRDN 6;853;82              |

## Model Applicability

Unknown features are fingerprint features in the query molecule, but not found in the training set.

1. All properties and OPS components are within expected ranges.
2. Unknown FCFP\_6 feature: 16: [\*]:[cH]:[\*]
3. Unknown FCFP\_6 feature: 1747237384: [\*][c](:[\*]):n:[cH]:[\*]
4. Unknown FCFP\_6 feature: -124685461: [\*]:n:[cH]:n:[\*]
5. Unknown FCFP\_6 feature: -1564473960: [\*]n1:[\*]:[\*]:[c](:[\*]):[c]:1:n:[\*]
6. Unknown FCFP\_6 feature: -1151884458: [\*]:n:[c](N):[c](:[\*]):[\*]
7. Unknown FCFP\_6 feature: -306856457: [\*]C([\*])n1:[cH]:[\*]:[\*]:[c]:1:[\*]
8. Unknown FCFP\_6 feature: 1315416442: [\*][C@H]1[\*][\*]O[C@H]1n(:[\*]):[\*]
9. Unknown FCFP\_6 feature: 1069584379: [\*]:[c](:[\*])N

## Feature Contribution

### Top features for positive contribution

| Fingerprint | Bit/Smiles | Feature Structure | Score |
|-------------|------------|-------------------|-------|
|             |            |                   |       |

|                                        |             |                                                                                                                                           |        |
|----------------------------------------|-------------|-------------------------------------------------------------------------------------------------------------------------------------------|--------|
| ECFP_6                                 | 642810091   | 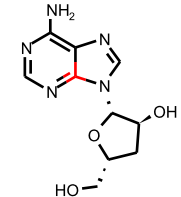<br><chem>[*]:[c](:[*]):[*]</chem>                     | 0.281  |
| FCFP_6                                 | -1272709286 | <br><chem>[*]C([*])CO</chem>                           | 0.115  |
| FCFP_6                                 | 178336375   | <br><chem>[*][c](:[*]):[c]1:n:[*]:[*]:[c]:1:[*]</chem> | 0.109  |
| Top Features for negative contribution |             |                                                                                                                                           |        |
| Fingerprint                            | Bit/Smiles  | Feature Structure                                                                                                                         | Score  |
| ECFP_6                                 | 683445015   | <br><chem>[*]O[*]</chem>                              | -0.266 |
| ECFP_6                                 | 655739385   | <br><chem>[*]:n:[*]</chem>                           | -0.239 |

|        |           |                                                                                                                                              |       |
|--------|-----------|----------------------------------------------------------------------------------------------------------------------------------------------|-------|
| ECFP_6 | 801490360 | 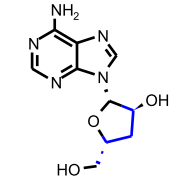<br><chem>Nc1ncnc2c1ncn2[C@H]3C[C@@H](O)[C@H](O)C3</chem> | 0.189 |
|--------|-----------|----------------------------------------------------------------------------------------------------------------------------------------------|-------|

# Ribavirin

TOPKAT\_Rat\_Oral\_LD50

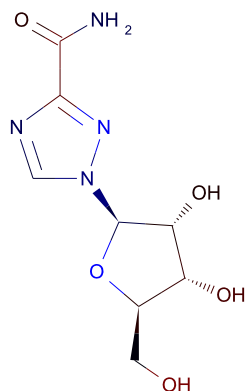

$C_8H_{12}N_4O_5$

Molecular Weight: 244.20467

ALogP: -2.745

Rotatable Bonds: 3

Acceptors: 7

Donors: 4

## Model Prediction

Prediction: 0.750

Unit: g/kg\_body\_weight

Mahalanobis Distance: 19.779

Mahalanobis Distance p-value: 3e-008

Mahalanobis Distance: The Mahalanobis distance (MD) is a generalization of the Euclidean distance that accounts for correlations among the X properties. It is calculated as the distance to the center of the training data. The larger the MD, the less trustworthy the prediction.

Mahalanobis Distance p-value: The p-value gives the fraction of training data with an MD greater than or equal to the one for the given sample, assuming normally distributed data. The smaller the p-value, the less trustworthy the prediction. For highly non-normal X properties (e.g., fingerprints), the MD p-value is wildly inaccurate.

## Structural Similar Compounds

| Name                        | RIBAVIRIN        | BREDININ         | TUBERCIDIN       |
|-----------------------------|------------------|------------------|------------------|
| Structure                   |                  |                  |                  |
| Actual Endpoint (-log C)    | 1.956            | 1.922            | 4.221            |
| Predicted Endpoint (-log C) | 2.51269          | 2.11795          | 2.53511          |
| Distance                    | 0.000            | 0.414            | 0.570            |
| Reference                   | PCJOAU 18;667;84 | IYKEDH 15;688;84 | CNREA8 29;116;69 |

## Model Applicability

Unknown features are fingerprint features in the query molecule, but not found in the training set.

1. All properties and OPS components are within expected ranges.
2. Unknown FCFP\_6 feature: 16: [\*]:[cH]:[\*]
3. Unknown FCFP\_6 feature: -2049666792: [\*]C([\*])n1:[cH]:[\*]:[\*]:n:1
4. Unknown FCFP\_6 feature: 4427049: [\*]n1:[\*]:[\*]:[c]([\*]):n:1
5. Unknown FCFP\_6 feature: -1539162406: [\*]C(=[\*])[c]1:n:[\*]:[\*]:n:1
6. Unknown FCFP\_6 feature: 1747237384: [\*][c]([\*]):n:[cH]:[\*]
7. Unknown FCFP\_6 feature: -124685461: [\*]:n:[cH]:n:[\*]
8. Unknown FCFP\_6 feature: 1315416442: [\*][C@H]1[\*][\*]O[C@H]1n(:[\*]):[\*]

## Feature Contribution

### Top features for positive contribution

| Fingerprint | Bit/Smiles | Feature Structure | Score |
|-------------|------------|-------------------|-------|
|             |            |                   |       |

| ECFP_6                                 | 642810091   | 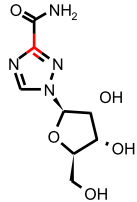<br><chem>[*]:[c](:[*]):[*]</chem> | 0.281  |
|----------------------------------------|-------------|-----------------------------------------------------------------------------------------------------------------------|--------|
| ECFP_6                                 | -1074141656 | <br><chem>[*]=O</chem>             | 0.142  |
| ECFP_6                                 | -932108170  | <br><chem>[*]C(=[*])N</chem>       | 0.126  |
| Top Features for negative contribution |             |                                                                                                                       |        |
| Fingerprint                            | Bit/Smiles  | Feature Structure                                                                                                     | Score  |
| ECFP_6                                 | 683445015   | <br><chem>[*]O[*]</chem>         | -0.266 |
| ECFP_6                                 | 655739385   | <br><chem>[*]:n:[*]</chem>       | -0.239 |

|        |             |                                                                                                                                                                                                                                                                                                                                                                                                                    |        |
|--------|-------------|--------------------------------------------------------------------------------------------------------------------------------------------------------------------------------------------------------------------------------------------------------------------------------------------------------------------------------------------------------------------------------------------------------------------|--------|
| FCFP_6 | -1549103449 | 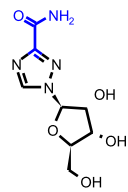 <p>Chemical structure of 2-((2S,3S,4S)-4-hydroxy-3-methoxy-2-methylpentan-2-yl)-1H-imidazole-4-carboxamide. The structure shows an imidazole ring with a carboxamide group (-CONH2) at position 4 and a (2S,3S,4S)-4-hydroxy-3-methoxy-2-methylpentan-2-yl group at position 2. The imidazole ring is highlighted in blue.</p> | -0.117 |
|--------|-------------|--------------------------------------------------------------------------------------------------------------------------------------------------------------------------------------------------------------------------------------------------------------------------------------------------------------------------------------------------------------------------------------------------------------------|--------|

[\*]:[c](:[\*])C(=O)N
